# Supplementary material for: Gemcitabine Modulates HLA-I Regulation to Improve Tumor Antigen Presentation by Pancreatic Cancer Cells
Source: MDPI journal article supplement (doi:10.3390/ijms25063211), 2024-03-11
Supplement: s1 [file s1]

**Table S1. Gemcitabine-exclusive HLA-I peptides mapped to a single source protein.**

|    | <i>Source protein</i>                                                 | <i>Peptide</i> | <i>Assigned HLA-I allotype(s)</i> | <i>IC50 (nM)</i> | <i>Immunogenicity score(s)<sup>#</sup></i> | <i>Accession number(s)</i> | <i>Repeated peptide sequence</i> |
|----|-----------------------------------------------------------------------|----------------|-----------------------------------|------------------|--------------------------------------------|----------------------------|----------------------------------|
| 1  | 26S proteasome regulatory subunit 6B                                  | LVIGQFLEA      | A*02:06                           | 17.5             | 0.124                                      | P43686                     |                                  |
| 2  | 7-dehydrocholesterol reductase                                        | GQWGRAWEV      | A*02:06                           | 2.7              | 0.439                                      | Q9UBM7                     |                                  |
| 3  | Adenylate kinase 2, mitochondrial                                     | FSIPDSLLI      | A*02:06                           | 53.5             | -0.118                                     | P54819                     |                                  |
| 4  | Adhesion G-protein coupled receptor G6                                | IQDPVIFYV      | A*02:06                           | 2.8              | 0.258                                      | Q86SQ4                     |                                  |
| 5  | ADP-ribosylation factor-like protein 6-interacting protein 1          | YLDPSVLSGV     | A*02:06                           | 8.8              | -0.255                                     | Q15041                     | ‡                                |
| 6  | Aminoacyl tRNA synthase complex-interacting multifunctional protein 2 | TVADVVLWSV     | A*02:06                           | 5.8              | 0.195                                      | Q13155                     |                                  |
| 7  | Angio-associated migratory cell protein                               | SGLLKVVQV      | A*02:06                           | 229.7            | -0.067                                     | Q13685                     |                                  |
| 8  | Anillin                                                               | FALVGSYTL      | A*02:06                           | 29.7             | -0.065                                     | Q9NQW6                     |                                  |
| 9  | AP-3 complex subunit mu-2                                             | FIPPDGNFRL     | A*02:06                           | 217.4            | 0.163                                      | P53677                     |                                  |
|    |                                                                       |                | C*01:02                           | 277.8            | 0.166                                      |                            |                                  |
| 10 | Apoptosis inhibitor 5                                                 | RVADILTQL      | A*02:06                           | 13.3             | 0.119                                      | Q9BZZ5                     | †                                |
| 11 | Aspartate--tRNA ligase, mitochondrial                                 | GGLDRYFQV      | A*02:06                           | 437.7            | 0.097                                      | Q6PI48                     |                                  |
| 12 | ATPase GET3                                                           | FAMEIDPSL      | A*02:06                           | 6.6              | 0.088                                      | O43681                     |                                  |
|    |                                                                       |                | C*01:02                           | 368.2            | 0.145                                      |                            |                                  |

|    |                                                               |             |         |       |        |        |   |
|----|---------------------------------------------------------------|-------------|---------|-------|--------|--------|---|
| 13 | ATP-dependent DNA/RNA helicase DHX36                          | YQLPEILRT   | A*02:06 | 31.1  | 0.229  | Q9H2U1 |   |
| 14 | Bax inhibitor 1                                               | NVFFGSIWL   | A*02:06 | 151.3 | 0.275  | P55061 |   |
| 15 | Biogenesis of lysosome-related organelles complex 1 subunit 1 | TIATALEYV   | A*02:06 | 7.2   | 0.162  | P78537 |   |
| 16 | Calponin-2                                                    | HQLENLSNFI  | A*02:06 | 43.6  | -0.013 | Q99439 |   |
| 17 | Carboxypeptidase D                                            | SLITLIEKV   | A*02:06 | 13.9  | 0.155  | O75976 |   |
| 18 | Catenin alpha-1                                               | KQDETQTKI   | A*02:06 | 328.0 | -0.057 | P35221 |   |
| 19 | Caveolae-associated protein 1                                 | SLLDKIIGA   | A*02:06 | 14.7  | 0.066  | Q6NZI2 | † |
| 20 | CCAAT/enhancer-binding protein beta                           | RAIDFSPYL   | A*02:06 | 11.9  | 0.012  | P17676 |   |
|    |                                                               |             | C*01:02 | 401.4 | -0.031 |        |   |
|    |                                                               |             | C*07:02 | 373.3 | 0.012  |        |   |
| 21 | CCN family member 1                                           | RALALVVTI   | A*02:06 | 91.8  | 0.121  | O00622 |   |
| 22 | Centrosomal protein of 55 kDa                                 | NQITQLESL   | A*02:06 | 71.5  | -0.053 | Q53EZ4 |   |
| 23 | Cold shock domain-containing protein E1                       | GVIEKLLTS   | A*02:06 | 271.8 | -0.063 | O75534 | † |
| 24 | Cold-inducible RNA-binding protein                            | GQISEVVVV   | A*02:06 | 16.0  | 0.072  | Q14011 | † |
| 25 | Conserved oligomeric Golgi complex subunit 4                  | SQMATILNL   | A*02:06 | 5.9   | 0.132  | Q9H9E3 |   |
| 26 | Cyclin-dependent kinase 12                                    | AQLELISRL   | A*02:06 | 10.3  | 0.102  | Q9NYV4 |   |
| 27 | Cyclin-dependent kinase 13                                    | AQLELISRI   | A*02:06 | 9.6   | 0.102  | Q14004 |   |
| 28 | Cytoplasmic dynein 1 heavy chain 1                            | IITKDLFQV   | A*02:06 | 10.3  | -0.162 | Q14204 | † |
| 29 | Cytoplasmic dynein 1 heavy chain 1                            | SVLDDNKLLTL | A*02:06 | 249.6 | -0.173 | Q14204 |   |
| 30 | Cytosolic 5'-nucleotidase 3A                                  | YAIEVDPVL   | A*02:06 | 34.2  | 0.220  | Q9H0P0 |   |

|    |                                                                          |            |         |       |        |        |   |
|----|--------------------------------------------------------------------------|------------|---------|-------|--------|--------|---|
| 31 | D-dopachrome decarboxylase                                               | KIGTVMTFL  | A*02:06 | 229.6 | 0.026  | P30046 |   |
| 32 | Death-associated protein kinase 1                                        | FLKQILNGV  | A*02:06 | 15.9  | -0.053 | P53355 |   |
| 33 | Disks large homolog 5                                                    | SQLELGVHL  | A*02:06 | 18.2  | 0.172  | Q8TDM6 |   |
| 34 | DISP complex protein LRCH3                                               | HLPEELAEL  | A*02:06 | 31.9  | 0.276  | Q96II8 |   |
|    |                                                                          |            | C*01:02 | 58.8  | 0.279  |        |   |
| 35 | DNA mismatch repair protein Msh6                                         | KIIGIMEEV  | A*02:06 | 3.4   | 0.185  | P52701 |   |
| 36 | DNA repair protein XRCC1                                                 | FQNPFRSEL  | A*02:06 | 46.2  | 0.068  | P18887 |   |
|    |                                                                          |            | C*07:02 | 131.3 | 0.068  |        |   |
| 37 | DNA replication licensing factor MCM2                                    | YVIEDDVNM  | A*02:06 | 26.8  | 0.217  | P49736 |   |
| 38 | DNA topoisomerase 3-alpha                                                | FVPEIFHRI  | A*02:06 | 5.3   | 0.394  | Q13472 |   |
|    |                                                                          |            | C*01:02 | 215.1 | 0.398  |        |   |
| 39 | Dolichyl-diphosphooligosaccharide--protein glycosyltransferase subunit 4 | VQLAIFANM  | A*02:06 | 47.5  | 0.305  | P0C6T2 | † |
| 40 | Dr1-associated corepressor                                               | FLKDLVASV  | A*02:06 | 9.2   | -0.083 | Q14919 |   |
| 41 | Dual specificity protein phosphatase 1                                   | KLDEAFEFV  | A*02:06 | 4.3   | 0.409  | P28562 |   |
| 42 | E3 ubiquitin-protein ligase HUWE1                                        | HVLDTLIQL  | A*02:06 | 21.3  | 0.091  | Q7Z6Z7 |   |
| 43 | E3 ubiquitin-protein ligase ZNF598                                       | FQEEDFPAL  | A*02:06 | 8.8   | 0.279  | Q86UK7 |   |
| 44 | E3 ubiquitin-protein transferase MAEA                                    | GVVEKLSVL  | A*02:06 | 309.4 | -0.222 | Q7L5Y9 |   |
| 45 | Ectoderm-neural cortex protein 1                                         | YLPPELLQTV | A*02:06 | 3.2   | 0.001  | O14682 | † |
|    |                                                                          |            | C*01:02 | 69.1  | 0.004  |        |   |

|    |                                                      |              |         |       |        |        |   |
|----|------------------------------------------------------|--------------|---------|-------|--------|--------|---|
| 46 | EH domain-containing protein 1                       | TVLGKIWKL    | A*02:06 | 26.3  | 0.007  | Q9H4M9 |   |
| 47 | EKC/KEOPS complex subunit LAGE3                      | SVINFLDQL    | A*02:06 | 11.1  | 0.091  | Q14657 |   |
| 48 | EKC/KEOPS complex subunit TPRKB                      | IVDPFQILV    | A*02:06 | 13.7  | 0.107  | Q9Y3C4 |   |
| 49 | Elongation factor 1-gamma                            | FSWEGAFQHV   | A*02:06 | 9.2   | 0.275  | P26641 | † |
| 50 | Epithelial cell adhesion molecule                    | YQLDPKFITSIL | A*02:06 | 75.5  | 0.016  | P16422 |   |
|    |                                                      |              | B*07:02 | 204.9 | 0.016  |        |   |
| 51 | Estradiol 17-beta-dehydrogenase 11                   | ILPERFLAV    | A*02:06 | 6.0   | 0.271  | Q8NBQ5 |   |
|    |                                                      |              | C*01:02 | 35.7  | 0.275  |        |   |
| 52 | Eukaryotic initiation factor 4A-I                    | QIYDIFQKL    | A*02:06 | 118.2 | 0.037  | P60842 |   |
| 53 | Eukaryotic peptide chain release factor subunit 1    | SVLGAITSV    | A*02:06 | 4.9   | 0.130  | P62495 |   |
| 54 | Eukaryotic translation initiation factor 3 subunit L | SVLNVLHSL    | A*02:06 | 11.0  | -0.050 | Q9Y262 | † |
| 55 | Eukaryotic translation initiation factor 3 subunit M | YIPTELDQV    | A*02:06 | 20.2  | 0.074  | Q7L2H7 | † |
| 56 | Eukaryotic translation initiation factor 4 gamma 1   | GVIDLIFEKA   | A*02:06 | 33.7  | 0.253  | Q04637 | † |
| 57 | Eukaryotic translation initiation factor 4 gamma 2   | AIISELVSI    | A*02:06 | 9.7   | -0.098 | P78344 | † |
| 58 | Exosome complex component RRP4                       | FLQEGDLISA   | A*02:06 | 23.2  | 0.123  | Q13868 | ‡ |
| 59 | Exportin-2                                           | AIIPYIPTL    | A*02:06 | 6.1   | 0.167  | P55060 |   |
| 60 | Fanconi anemia group B protein                       | AVWKESFQV    | A*02:06 | 9.5   | -0.172 | Q8NB91 |   |
| 61 | Fatty acid synthase                                  | QTPEFFQDV    | A*02:06 | 119.8 | 0.237  | P49327 |   |
| 62 | Fc receptor-like protein 1                           | LLSTLGPATV   | A*02:06 | 272.9 | 0.053  | Q96LA6 |   |
| 63 | Ferritin light chain                                 | YLQASYTYL    | A*02:06 | 12.5  | -0.132 | P02792 | † |

|    |                                                                            |              |         |       |        |        |   |
|----|----------------------------------------------------------------------------|--------------|---------|-------|--------|--------|---|
|    |                                                                            |              | C*01:02 | 350.1 | -0.095 |        |   |
| 64 | Fibronectin type III domain-containing protein 3B                          | AQQVILVQV    | A*02:06 | 23.6  | 0.090  | Q53EP0 |   |
| 65 | Follicle-stimulating hormone receptor                                      | LSQLYVMSLL   | A*02:06 | 173.2 | -0.324 | P23945 |   |
| 66 | G2/mitotic-specific cyclin-B1                                              | ILIDWLQVQV   | A*02:06 | 2.6   | 0.238  | P14635 |   |
| 67 | G2/mitotic-specific cyclin-B2                                              | ILVDWLQVQV   | A*02:06 | 3.3   | 0.208  | O95067 |   |
| 68 | Glutamine and serine-rich protein 1                                        | AQLPSLLSV    | A*02:06 | 3.2   | -0.292 | Q2KHR3 |   |
| 69 | Glyceraldehyde-3-phosphate dehydrogenase                                   | ILGYTEHQV    | A*02:06 | 419.4 | 0.099  | P04406 |   |
| 70 | Glycerol-3-phosphate acyltransferase 3                                     | VLLPLRVTL    | A*02:06 | 132.6 | 0.081  | Q53EU6 |   |
| 71 | Glycogen phosphorylase, liver form                                         | MIKLITSV     | A*02:06 | 4.6   | -0.123 | P06737 |   |
| 72 | Glycolipid transfer protein                                                | YTQMNAELNYKV | A*02:06 | 219.9 | -0.231 | Q9NZD2 |   |
| 73 | Golgi-specific brefeldin A-resistance guanine nucleotide exchange factor 1 | FVDPNGKISL   | A*02:06 | 233.7 | -0.165 | Q92538 | † |
|    |                                                                            |              | C*01:02 | 262.2 | -0.172 |        |   |
| 74 | GRIP and coiled-coil domain-containing protein 2                           | TQLELSEQL    | A*02:06 | 42.0  | -0.053 | Q8IWJ2 |   |
| 75 | Growth arrest and DNA damage-inducible protein GADD45 alpha                | RTITVGVYEA   | A*02:06 | 247.3 | 0.250  | P24522 |   |
| 76 | GTP-binding protein 4                                                      | QSLEYLEQV    | A*02:06 | 25.0  | 0.100  | Q9BZE4 |   |
| 77 | Histone deacetylase complex subunit SAP18                                  | ATLKELTSL    | A*02:06 | 92.5  | -0.197 | O00422 |   |
| 78 | Histone-lysine N-methyltransferase 2A                                      | AVFPDDMPTL   | A*02:06 | 84.2  | -0.082 | Q03164 | † |
| 79 | Importin-9                                                                 | TAIDILTTV    | A*02:06 | 7.3   | 0.240  | Q96P70 | † |
| 80 | Interleukin enhancer-binding factor 2                                      | STVKVLIRL    | A*02:06 | 192.6 | -0.031 | Q12905 | † |

|    |                                                        |            |         |       |         |        |   |
|----|--------------------------------------------------------|------------|---------|-------|---------|--------|---|
| 81 | Interleukin-6 receptor subunit beta                    | KILDYEVTL  | A*02:06 | 27.1  | 0.167   | P40189 |   |
| 82 | Inverted formin-2                                      | EVVERLLSV  | A*02:06 | 48.1  | 0.048   | Q27J81 |   |
| 83 | Keratin, type II cytoskeletal 80                       | NLLQVLEKV  | A*02:06 | 30.31 | -0.1319 | Q6KB66 |   |
| 84 | KH homology domain-containing protein 4                | VQDKLFVGL  | A*02:06 | 75.5  | -0.056  | Q7Z7F0 |   |
| 85 | Kinesin-like protein KIF11                             | TVLQELINV  | A*02:06 | 11.2  | 0.075   | P52732 | † |
| 86 | Kinesin-like protein KIF1C                             | GQVDMDIKL  | A*02:06 | 82.9  | -0.128  | O43896 | † |
| 87 | Kinesin-like protein KIF3B                             | KVVDVDVKL  | A*02:06 | 105.3 | 0.006   | O15066 |   |
| 88 | Laminin subunit alpha-3                                | SLLQTNIAL  | A*02:06 | 103.4 | 0.047   | Q16787 |   |
| 89 | Large ribosomal subunit protein mL65                   | SVPIEPTI   | A*02:06 | 235.2 | 0.366   | Q9NP92 |   |
|    |                                                        |            | C*01:02 | 332.2 | 0.370   |        |   |
| 90 | Large ribosomal subunit protein uL30                   | DLIHEITYV  | A*02:06 | 135.3 | 0.318   | P18124 |   |
| 91 | Large ribosomal subunit protein uL6                    | LILEGNDIEL | A*02:06 | 277.1 | 0.316   | P32969 |   |
| 92 | Ligand-dependent nuclear receptor-interacting factor 1 | SVLQSIEKI  | A*02:06 | 391.1 | -0.197  | Q5T3J3 |   |
| 93 | Lipase member H                                        | FCMYHYFVDI | A*02:06 | 367.2 | 0.125   | Q8WWY8 |   |
| 94 | Lysine--tRNA ligase                                    | KLVGEFLEV  | A*02:06 | 3.9   | 0.304   | Q15046 |   |
| 95 | Lysyl oxidase homolog 4                                | RIPEEGLLEV | A*02:06 | 61.8  | 0.266   | Q96JB6 |   |
| 96 | Macrophage migration inhibitory factor                 | FLSELTQQL  | A*02:06 | 7.2   | -0.093  | P14174 |   |
|    |                                                        |            | C*07:02 | 288.4 | -0.093  |        |   |
| 97 | Matrin-3                                               | YTIPDEYRI  | A*02:06 | 29.0  | 0.175   | P43243 |   |
| 98 | Mediator of RNA polymerase II transcription subunit 23 | LIPKFLTEV  | A*02:06 | 6.8   | -0.026  | Q9ULK4 |   |

|     |                                                               |            |         |       |        |        |   |
|-----|---------------------------------------------------------------|------------|---------|-------|--------|--------|---|
|     |                                                               |            | C*01:02 | 275.7 | -0.022 |        |   |
| 99  | Metaxin-3                                                     | SQIPFPLSL  | A*02:06 | 13.9  | 0.030  | Q5HYI7 |   |
|     |                                                               |            | C*07:02 | 337.5 | 0.030  |        |   |
| 100 | Microfibrillar-associated protein 1                           | TILPKVMQV  | A*02:06 | 20.1  | -0.402 | P55081 | † |
| 101 | Microtubule-actin cross-linking factor 1, isoforms 1/2/3/4/5  | ALLDWVTSV  | A*02:06 | 3.0   | 0.209  | Q9UPN3 |   |
| 102 | Minor histocompatibility antigen H13                          | FGTNVMVTV  | A*02:06 | 55.7  | -0.061 | Q8TCT9 |   |
| 103 | Mitochondrial carrier homolog 1                               | VQVDGKIGL  | A*02:06 | 125.7 | -0.002 | Q9NZJ7 | ‡ |
| 104 | Mitochondrial potassium channel                               | SVLGALIGV  | A*02:06 | 3.0   | 0.190  | Q96ER9 |   |
| 105 | Mitotic checkpoint serine/threonine-protein kinase BUB1 beta  | KIVDFSYSV  | A*02:06 | 2.5   | -0.106 | O60566 |   |
| 106 | Monocarboxylate transporter 1                                 | YAFPKSITV  | A*02:06 | 7.5   | -0.204 | P53985 |   |
|     |                                                               |            | C*01:02 | 282.5 | -0.242 |        |   |
|     |                                                               |            | C*07:02 | 222.6 | -0.204 |        |   |
| 107 | Myoglobin                                                     | GLSDGEWQL  | A*02:06 | 52.5  | 0.215  | P02144 |   |
| 108 | NADH dehydrogenase [ubiquinone] 1 alpha subcomplex subunit 13 | LQIEDFEARI | A*02:06 | 32.6  | 0.437  | Q9P0J0 |   |
| 109 | Nardilysin                                                    | TQVTALIKL  | A*02:06 | 79.5  | 0.066  | O43847 |   |
| 110 | NEDD4-binding protein 2                                       | AAIEIFEKV  | A*02:06 | 10.1  | 0.342  | Q86UW6 |   |
| 111 | Nuclear factor NF-kappa-B p100 subunit                        | SVIEQIVYV  | A*02:06 | 2.4   | 0.189  | Q00653 | ‡ |
| 112 | Nuclear pore complex protein Nup50                            | SVLGSLSSV  | A*02:06 | 5.2   | -0.377 | Q9UKX7 |   |
| 113 | Nucleolar GTP-binding protein 2                               | IVLKGVVQV  | A*02:06 | 16.9  | -0.182 | Q13823 |   |

|     |                                           |             |         |       |        |        |   |
|-----|-------------------------------------------|-------------|---------|-------|--------|--------|---|
| 114 | Nucleolar protein 56                      | VIAEILRGV   | A*02:06 | 7.9   | 0.296  | O00567 |   |
| 115 | Nucleolysin TIAR                          | SQWGQWSQV   | A*02:06 | 8.5   | -0.006 | Q01085 |   |
| 116 | ORM1-like protein 2                       | ATYVFLHTV   | A*02:06 | 6.3   | 0.194  | Q53FV1 |   |
| 117 | PDZ domain-containing protein GIPC1       | SVIDHIHLI   | A*02:06 | 4.4   | 0.243  | O14908 | † |
| 118 | Pecanex-like protein 3                    | GVLENIFGV   | A*02:06 | 2.4   | 0.335  | Q9H6A9 |   |
| 119 | Peptidyl-prolyl cis-trans isomerase C     | VTAKVFFDV   | A*02:06 | 29.3  | 0.058  | P45877 |   |
| 120 | PHD finger protein 20-like protein 1      | NLLTHIENV   | A*02:06 | 18.1  | 0.273  | A8MW92 |   |
| 121 | Phospholipase A-2-activating protein      | SLISTILEV   | A*02:06 | 5.9   | 0.089  | Q9Y263 |   |
| 122 | Plastin-1                                 | EIVEKILSV   | A*02:06 | 81.3  | -0.077 | Q14651 |   |
| 123 | Plectin                                   | YVIDPIKGLKL | A*02:06 | 385.4 | -0.129 | Q15149 |   |
| 124 | Pogo transposable element with ZNF domain | NQVGIVLNV   | A*02:06 | 10.4  | 0.203  | Q7Z3K3 |   |
| 125 | Probable ATP-dependent RNA helicase DDX52 | FQMPTPIQM   | A*02:06 | 9.1   | 0.004  | Q9Y2R4 |   |
|     |                                           |             | C*07:02 | 98.3  | 0.004  |        |   |
| 126 | Proteasome maturation protein             | QQVQRLPFL   | A*02:06 | 31.3  | -0.004 | Q9Y244 |   |
| 127 | Protein cereblon                          | QVIPVLPQV   | A*02:06 | 5.1   | -0.015 | Q96SW2 |   |
| 128 | Protein disulfide-isomerase A3            | LAAARLAAA   | A*02:06 | 201.5 | 0.148  | P30101 |   |
| 129 | Protein FAM171B                           | VLLKARLVPA  | A*02:06 | 78.4  | -0.114 | Q6P995 |   |
| 130 | Protein FAM83D                            | TQTAVITRI   | A*02:06 | 206.1 | 0.280  | Q9H4H8 |   |
| 131 | Protein flightless-1 homolog              | SLFPGKLEV   | A*02:06 | 12.4  | -0.094 | Q13045 | † |
| 132 | Protein flightless-1 homolog              | SQVEIKLSL   | A*02:06 | 42.8  | -0.065 | Q13045 |   |
| 133 | Protein mono-ADP-ribosyltransferase PARP4 | FIFSDTHEL   | A*02:06 | 4.2   | 0.015  | Q9UKK3 |   |



|     |                                                    |             |         |       |        |        |   |
|-----|----------------------------------------------------|-------------|---------|-------|--------|--------|---|
|     |                                                    |             | C*01:02 | 459.2 | -0.023 |        |   |
|     |                                                    |             | C*07:02 | 245.4 | 0.015  |        |   |
| 134 | Protein PRRC2C                                     | SQFQQEFPSL  | A*02:06 | 84.0  | -0.090 | Q9Y520 |   |
| 135 | Protein RRP5 homolog                               | VQYNEPLKV   | A*02:06 | 61.7  | -0.056 | Q14690 |   |
| 136 | Protein S100-A11                                   | GQLDFSEFLNL | A*02:06 | 112.8 | 0.166  | P31949 |   |
| 137 | Protein transport protein Sec24A                   | FLLHIQQQV   | A*02:06 | 7.3   | -0.116 | O95486 |   |
| 138 | Protein unc-45 homolog A                           | NLLDLLTEV   | A*02:06 | 4.1   | 0.089  | Q9H3U1 |   |
| 139 | Protein unc-80 homolog                             | RQTSQVETV   | A*02:06 | 64.0  | -0.121 | Q8N2C7 |   |
| 140 | Ras association domain-containing protein 1        | GSYTGFIKV   | A*02:06 | 62.5  | 0.167  | Q9NS23 |   |
| 141 | Ras GTPase-activating protein-binding protein 1    | YQDEVFGGF   | A*02:06 | 53.8  | 0.307  | Q13283 |   |
| 142 | Ras-related protein Rab-18                         | ATIGVDFKV   | A*02:06 | 14.0  | 0.111  | Q9NP72 |   |
| 143 | Renin receptor                                     | NAVVELVTV   | A*02:06 | 193.1 | 0.200  | O75787 |   |
| 144 | Replication protein A 32 kDa subunit               | TLVDEVFRI   | A*02:06 | 19.9  | 0.301  | P15927 |   |
| 145 | Reticulon-4                                        | AQIDHYLGL   | A*02:06 | 6.1   | 0.104  | Q9NQC3 |   |
| 146 | Retinaldehyde dehydrogenase 3                      | KQFDKILEL   | A*02:06 | 5.0   | 0.025  | P47895 |   |
|     |                                                    |             | C*07:02 | 304.9 | 0.025  |        |   |
| 147 | Rhomboid domain-containing protein 2               | YSIDLSERV   | A*02:06 | 19.7  | 0.014  | Q6NTF9 | † |
| 148 | Rho-related GTP-binding protein RhoD               | AVFQEAAEV   | A*02:06 | 40.8  | 0.147  | O00212 | † |
| 149 | Ribonucleoside-diphosphate reductase large subunit | FVDPAQITM   | A*02:06 | 36.3  | 0.060  | P23921 | † |
| 150 | Ribosomal L1 domain-containing protein 1           | HIENIVAV    | A*02:06 | 4.3   | 0.321  | O76021 |   |

|     |                                                          |            |         |       |        |        |   |
|-----|----------------------------------------------------------|------------|---------|-------|--------|--------|---|
| 151 | RING finger protein 214                                  | ALFPAPLAQI | A*02:06 | 100.7 | 0.009  | Q8ND24 |   |
| 152 | Serine palmitoyltransferase 1                            | STIKEVAQA  | A*02:06 | 148.7 | -0.072 | O15269 |   |
| 153 | Serine/threonine-protein kinase DCLK1                    | SAIKYLHSL  | A*02:06 | 28.6  | -0.257 | O15075 |   |
| 154 | Serine/threonine-protein phosphatase 4 catalytic subunit | AILELDEHL  | A*02:06 | 130.1 | 0.211  | P60510 |   |
| 155 | Serine/threonine-protein phosphatase 4 catalytic subunit | FVDRGFYSV  | A*02:06 | 2.8   | 0.103  | P60510 | † |
| 156 | Small integral membrane protein 30                       | SVSTQLSLV  | A*02:06 | 98.4  | -0.284 | A4D0T7 |   |
| 157 | Small ribosomal subunit protein eS19                     | KVPEWVDTV  | A*02:06 | 7.5   | 0.393  | P39019 |   |
| 158 | Small ribosomal subunit protein uS3                      | FVADGIFKA  | A*02:06 | 3.6   | 0.166  | P23396 | † |
| 159 | Small ribosomal subunit protein uS9                      | KLLEPVLLL  | A*02:06 | 12.2  | 0.109  | P62249 |   |
| 160 | Speriolin-like protein                                   | YVFPGVTRL  | A*02:06 | 10.7  | 0.162  | Q9H0A9 | † |
|     |                                                          |            | C*07:02 | 229.8 | 0.162  |        |   |
| 161 | Splicing factor 3B subunit 3                             | GQWASVIRV  | A*02:06 | 6.7   | 0.132  | Q15393 | † |
| 162 | Structural maintenance of chromosomes protein 5          | KMIEDLQNEL | A*02:06 | 21.2  | 0.099  | Q8IY18 |   |
| 163 | T-complex protein 1 subunit theta                        | EVISKLYAV  | A*02:06 | 14.4  | -0.324 | P50990 | ‡ |
| 164 | Threonine--tRNA ligase 1, cytoplasmic                    | TVIAKVNNV  | A*02:06 | 31.4  | -0.098 | P26639 |   |
| 165 | Transcription elongation factor SPT5                     | VTTDIQVKV  | A*02:06 | 249.7 | -0.036 | O00267 |   |
| 166 | Transcription factor Sp1                                 | QVIPQFQTV  | A*02:06 | 16.7  | -0.046 | P08047 |   |
| 167 | Transcriptional repressor protein YY1                    | YIEQTLVTV  | A*02:06 | 36.9  | 0.001  | P25490 |   |
| 168 | Transmembrane emp24 domain-containing protein 2          | KMGLIFEV   | A*02:06 | 60.0  | 0.324  | Q15363 |   |

|     |                                                       |             |         |       |        |        |
|-----|-------------------------------------------------------|-------------|---------|-------|--------|--------|
| 169 | Transmembrane emp24 domain-containing protein 9       | SLFAGGMLRV  | A*02:06 | 27.5  | -0.001 | Q9BVK6 |
| 170 | Transmembrane protein 41B                             | FAIPGSIFL   | A*02:06 | 11.4  | 0.090  | Q5BJD5 |
|     |                                                       |             | C*01:02 | 268.3 | 0.047  |        |
|     |                                                       |             | C*07:02 | 428.7 | 0.090  |        |
| 171 | Tripartite motif-containing protein 5                 | NIVEKLREV   | A*02:06 | 52.4  | -0.004 | Q9C035 |
| 172 | Tyrosine-protein kinase receptor UFO                  | NQDDSILKV   | A*02:06 | 98.6  | -0.142 | P30530 |
| 173 | Ubiquitin-like modifier-activating enzyme 6           | ALLNILSEV   | A*02:06 | 3.9   | 0.028  | A0AVT1 |
| 174 | UDP-N-acetylhexosamine pyrophosphorylase              | NIANHFFTV   | A*02:06 | 4.2   | 0.269  | Q16222 |
| 175 | UMP-CMP kinase                                        | KIVPVEITI   | A*02:06 | 187.7 | 0.272  | P30085 |
| 176 | Utrophin                                              | NQWDGTQHGV  | A*02:06 | 45.1  | 0.103  | P46939 |
| 177 | Voltage-dependent anion-selective channel protein 2   | YQLDPTASISA | A*02:06 | 120.7 | -0.056 | P45880 |
| 178 | V-type proton ATPase subunit d 1                      | RLYPEGLAQL  | A*02:06 | 44.6  | 0.073  | P61421 |
|     |                                                       |             | A*24:02 | 390.3 | 0.073  |        |
|     |                                                       |             | C*01:02 | 403.9 | 0.074  |        |
| 179 | Zinc finger protein 217                               | ATINEVVQV   | A*02:06 | 16.1  | 0.140  | O75362 |
| 180 | 26S proteasome regulatory subunit 8                   | YYLSKIEEL   | A*24:02 | 26.8  | -0.112 | P62195 |
|     |                                                       |             | C*07:02 | 30.8  | -0.112 |        |
| 181 | Abnormal spindle-like microcephaly-associated protein | SYNPLWLRI   | A*24:02 | 14.4  | 0.205  | Q8IZT6 |
| 182 | Activated CDC42 kinase 1                              | QYLKVEQLF   | A*24:02 | 13.3  | -0.190 | Q07912 |
| 183 | AF4/FMR2 family member 4                              | SYVQVTSNF   | A*24:02 | 12.2  | -0.170 | Q9UHB7 |

|     |                                                                             |             |         |       |        |        |   |
|-----|-----------------------------------------------------------------------------|-------------|---------|-------|--------|--------|---|
|     |                                                                             |             | C*07:02 | 185.8 | -0.170 |        |   |
| 184 | AKT-interacting protein                                                     | LYQDGVFKF   | A*24:02 | 9.7   | 0.029  | Q9H8T0 |   |
| 185 | Alpha-enolase                                                               | RYISPDQLADL | A*24:02 | 460.5 | -0.190 | P06733 | † |
| 186 | AP-2 complex subunit sigma                                                  | AYLEAIHNF   | A*24:02 | 9.0   | 0.284  | P53680 |   |
|     |                                                                             |             | C*07:02 | 283.5 | 0.284  |        |   |
| 187 | Aquaporin-3                                                                 | LYYDAIWHF   | A*24:02 | 13.6  | 0.390  | Q92482 |   |
|     |                                                                             |             | C*07:02 | 124.0 | 0.390  |        |   |
| 188 | Aspartate aminotransferase, mitochondrial                                   | EYLPIGGLAEF | A*24:02 | 250.5 | 0.262  | P00505 | ‡ |
| 189 | ATPase family AAA domain-containing protein 2                               | LYPEVFEKF   | A*24:02 | 7.9   | 0.206  | Q6PL18 | † |
|     |                                                                             |             | C*07:02 | 237.1 | 0.206  |        |   |
| 190 | BLOC-2 complex member HPS3                                                  | IYPWVHVVI   | A*24:02 | 19.6  | 0.349  | Q969F9 |   |
|     |                                                                             |             | C*07:02 | 405.0 | 0.349  |        |   |
| 191 | Brain-specific angiogenesis inhibitor 1-associated protein 2-like protein 2 | IYKSIMEQF   | A*24:02 | 15.2  | -0.255 | Q6UXY1 | † |
|     |                                                                             |             | C*07:02 | 195.5 | -0.255 |        |   |
| 192 | Breast cancer anti-estrogen resistance protein 3                            | AYSRVQYQF   | A*24:02 | 10.4  | -0.141 | O75815 | † |
|     |                                                                             |             | C*07:02 | 380.8 | -0.141 |        |   |
| 193 | Carnitine O-palmitoyltransferase 1, liver isoform                           | VYPASPSSWLI | A*24:02 | 27.6  | -0.273 | P50416 |   |
| 194 | CCAAT/enhancer-binding protein zeta                                         | LYQHEINLF   | A*24:02 | 11.1  | 0.206  | Q03701 |   |
| 195 | Cellular tumor antigen p53                                                  | TYSPALNKMf  | A*24:02 | 46.3  | -0.328 | P04637 | † |
| 196 | Cip1-interacting zinc finger protein                                        | RYFKTPRKF   | A*24:02 | 30.6  | -0.234 | Q9ULV3 |   |

|     |                                                  |            |         |       |        |        |   |
|-----|--------------------------------------------------|------------|---------|-------|--------|--------|---|
|     |                                                  |            | C*07:02 | 149.3 | -0.234 |        |   |
| 197 | Cleavage stimulation factor subunit 3            | AYIDYLSHL  | A*24:02 | 63.5  | -0.069 | Q12996 |   |
|     |                                                  |            | C*07:02 | 74.0  | -0.069 |        |   |
| 198 | Condensin-2 complex subunit H2                   | LFIATSQKF  | A*24:02 | 39.0  | -0.259 | Q6IBW4 |   |
| 199 | Cytochrome b-245 light chain                     | AYSIVAGVF  | A*24:02 | 86.8  | 0.210  | P13498 | † |
| 200 | Cytoplasmic dynein 1 heavy chain 1               | RYKLYQEMF  | A*24:02 | 26.2  | -0.212 | Q14204 | ‡ |
|     |                                                  |            | C*07:02 | 496.6 | -0.212 |        |   |
| 201 | Cytoplasmic dynein 2 intermediate chain 2        | RWSPVRPLVF | A*24:02 | 16.5  | 0.030  | Q96EX3 | ‡ |
| 202 | Cytoplasmic FMR1-interacting protein 1           | LYQPNFNTNF | A*24:02 | 8.8   | 0.082  | Q7L576 |   |
|     |                                                  |            | C*07:02 | 408.7 | 0.082  |        |   |
| 203 | Deoxyribonuclease TATDN1                         | KYFEKQFEL  | A*24:02 | 46.0  | -0.023 | Q6P1N9 |   |
|     |                                                  |            | C*07:02 | 67.4  | -0.023 |        |   |
| 204 | DNA ligase 1                                     | KYPDIIISRI | A*24:02 | 24.3  | 0.164  | P18858 | † |
|     |                                                  |            | C*07:02 | 425.3 | 0.164  |        |   |
| 205 | DNA repair protein RAD50                         | EYVEKFYRI  | A*24:02 | 30.0  | 0.041  | Q92878 |   |
| 206 | DNA topoisomerase 3-beta-1                       | KYLQSTISF  | A*24:02 | 12.0  | -0.229 | O95985 |   |
|     |                                                  |            | C*07:02 | 299.2 | -0.229 |        |   |
| 207 | DNA-(apurinic or apyrimidinic site) endonuclease | YFLLSHSLL  | A*24:02 | 217.3 | -0.292 | P27695 |   |
|     |                                                  |            | C*07:02 | 374.3 | -0.292 |        |   |
| 208 | DNA-dependent protein kinase catalytic subunit   | YYIQNGIQSF | A*24:02 | 8.1   | -0.116 | P78527 |   |
|     |                                                  |            | C*07:02 | 73.0  | -0.116 |        |   |

|     |                                                                    |             |         |       |        |        |   |
|-----|--------------------------------------------------------------------|-------------|---------|-------|--------|--------|---|
| 209 | DNA-directed RNA polymerase I subunit RPA1                         | VYQLRFQFL   | A*24:02 | 21.8  | 0.082  | O95602 |   |
|     |                                                                    |             | C*07:02 | 172.4 | 0.082  |        |   |
| 210 | E3 ubiquitin-protein ligase ZNF598                                 | DYAYLREHF   | A*24:02 | 291.9 | 0.150  | Q86UK7 |   |
| 211 | EH domain-containing protein 2                                     | KYDEIFYNL   | A*24:02 | 52.5  | 0.341  | Q9NZN4 | † |
|     |                                                                    |             | C*07:02 | 422.8 | 0.341  |        |   |
| 212 | Elongation of very long chain fatty acids protein 1                | QYPVIIHLI   | A*24:02 | 11.2  | 0.314  | Q9BW60 | ‡ |
| 213 | Elongation of very long chain fatty acids protein 5                | KYITQGQLLQF | A*24:02 | 52.9  | -0.198 | Q9NYP7 | † |
| 214 | Epidermal growth factor receptor kinase substrate 8-like protein 1 | EYTDVLQKI   | A*24:02 | 299.5 | -0.159 | Q8TE68 |   |
| 215 | Ethanolamine kinase 1                                              | AYLEAYKEF   | A*24:02 | 32.2  | 0.008  | Q9HBU6 |   |
|     |                                                                    |             | C*07:02 | 298.8 | 0.008  |        |   |
| 216 | Eukaryotic initiation factor 4A-I                                  | RYLSPKYIKMF | A*24:02 | 47.1  | -0.554 | P60842 |   |
| 217 | Eukaryotic translation initiation factor 2D                        | SYPDLLPTF   | A*24:02 | 11.5  | 0.011  | P41214 |   |
|     |                                                                    |             | C*07:02 | 77.8  | 0.011  |        |   |
| 218 | Fanconi anemia group D2 protein                                    | SYPKIIEEF   | A*24:02 | 10.3  | 0.177  | Q9BXW9 |   |
|     |                                                                    |             | C*07:02 | 133.6 | 0.177  |        |   |
| 219 | Fanconi anemia group I protein                                     | FYQPKIQQF   | A*24:02 | 12.6  | -0.299 | Q9NVI1 | † |
|     |                                                                    |             | C*07:02 | 18.2  | -0.299 |        |   |
| 220 | Filamin-B                                                          | YYPSTPGRYSI | A*24:02 | 93.1  | -0.161 | O75369 |   |
| 221 | G1/S-specific cyclin-D3                                            | RYVPRASYF   | A*24:02 | 12.1  | -0.052 | P30281 |   |
|     |                                                                    |             | C*07:02 | 28.9  | -0.052 |        |   |

|     |                                                     |             |         |       |        |        |   |
|-----|-----------------------------------------------------|-------------|---------|-------|--------|--------|---|
| 222 | Glutathione peroxidase 3                            | QYAGKYVLF   | A*24:02 | 11.1  | -0.138 | P22352 |   |
|     |                                                     |             | C*07:02 | 350.0 | -0.138 |        |   |
| 223 | Guanine nucleotide-binding protein subunit alpha-15 | RYLDEINLL   | A*24:02 | 24.8  | 0.230  | P30679 |   |
|     |                                                     |             | C*07:02 | 256.0 | 0.230  |        |   |
| 224 | Heat shock protein beta-1                           | RLPEEWSQW   | A*24:02 | 193.1 | 0.196  | P04792 | † |
| 225 | Helicase-like transcription factor                  | SYPTFFPRF   | A*24:02 | 5.8   | 0.281  | Q14527 |   |
|     |                                                     |             | C*07:02 | 65.5  | 0.281  |        |   |
| 226 | Histone-lysine N-methyltransferase ASH1L            | TYDYNFHSF   | A*24:02 | 17.8  | 0.038  | Q9NR48 |   |
|     |                                                     |             | C*07:02 | 59.6  | 0.038  |        |   |
| 227 | Importin-7                                          | YYNPHLLLNTL | A*24:02 | 143.4 | 0.003  | O95373 |   |
|     |                                                     |             | C*07:02 | 151.7 | 0.003  |        |   |
| 228 | Integrin beta-4                                     | DYTIGFGKF   | A*24:02 | 487.3 | 0.192  | P16144 | † |
| 229 | Iron-responsive element-binding protein 2           | TYLKAVKLF   | A*24:02 | 11.1  | -0.332 | P48200 | † |
|     |                                                     |             | C*07:02 | 413.5 | -0.332 |        |   |
| 230 | Kinesin-like protein KIF2C                          | IYNGKLFDL   | A*24:02 | 161.9 | -0.077 | Q99661 | † |
|     |                                                     |             | C*07:02 | 237.7 | -0.077 |        |   |
| 231 | La-related protein 4                                | VYSIVPQSW   | A*24:02 | 36.4  | -0.084 | Q71RC2 | † |
| 232 | Large ribosomal subunit protein eL19                | LYLKVKGNVF  | A*24:02 | 74.0  | -0.340 | P84098 | † |
| 233 | Large ribosomal subunit protein eL27                | KWFFQKLRF   | A*24:02 | 32.3  | -0.139 | P61353 |   |
| 234 | Large ribosomal subunit protein uL22                | RWPKKSAEFL  | A*24:02 | 232.8 | -0.367 | P18621 |   |

|     |                                                                  |             |         |       |        |        |   |
|-----|------------------------------------------------------------------|-------------|---------|-------|--------|--------|---|
| 235 | Leucine-rich PPR motif-containing protein, mitochondrial         | IYKPVTDF    | A*24:02 | 9.1   | 0.083  | P42704 | ‡ |
|     |                                                                  |             | C*07:02 | 84.4  | 0.083  |        |   |
| 236 | Melanophilin                                                     | YYEHVKARF   | A*24:02 | 62.0  | -0.034 | Q9BV36 |   |
|     |                                                                  |             | C*07:02 | 238.8 | -0.034 |        |   |
| 237 | Mitofusin-2                                                      | AYIQESATF   | A*24:02 | 18.8  | -0.076 | O95140 |   |
|     |                                                                  |             | C*07:02 | 344.7 | -0.076 |        |   |
| 238 | Molybdenum cofactor sulfurase                                    | VYLDHAGATLF | A*24:02 | 28.4  | 0.184  | Q96EN8 |   |
| 239 | Myotubularin-related protein 12                                  | LYIPIFSTF   | A*24:02 | 4.6   | 0.155  | Q9C0I1 |   |
|     |                                                                  |             | C*07:02 | 84.1  | 0.155  |        |   |
| 240 | Myotubularin-related protein 6                                   | NYSNIRFQF   | A*24:02 | 12.1  | 0.149  | Q9Y217 |   |
|     |                                                                  |             | C*07:02 | 71.9  | 0.149  |        |   |
| 241 | N-acetyllactosaminide beta-1,3-N-acetylglucosaminyltransferase 2 | NYRDTFFNL   | A*24:02 | 104.9 | 0.282  | Q9NY97 |   |
|     |                                                                  |             | C*07:02 | 109.0 | 0.282  |        |   |
| 242 | NADH dehydrogenase [ubiquinone] 1 beta subcomplex subunit 6      | VYKKSIFVF   | A*24:02 | 9.2   | -0.200 | O95139 |   |
|     |                                                                  |             | C*07:02 | 104.6 | -0.200 |        |   |
| 243 | Neutral cholesterol ester hydrolase 1                            | KYFLKPEVL   | A*24:02 | 143.9 | -0.085 | Q6PIU2 |   |
|     |                                                                  |             | C*07:02 | 340.3 | -0.085 |        |   |
| 244 | Nuclear autoantigenic sperm protein                              | NYVQAVEEF   | A*24:02 | 37.5  | 0.117  | P49321 |   |
|     |                                                                  |             | C*07:02 | 221.8 | 0.117  |        |   |



|     |                                                 |             |         |       |        |          |
|-----|-------------------------------------------------|-------------|---------|-------|--------|----------|
| 245 | Nuclear pore complex protein<br>Nup107          | AYLEAHETF   | A*24:02 | 11.6  | 0.273  | P57740   |
|     |                                                 |             | C*07:02 | 292.5 | 0.273  |          |
| 246 | Nuclear receptor corepressor 1                  | TYIPGTQITF  | A*24:02 | 13.0  | 0.129  | O75376   |
|     |                                                 |             | C*07:02 | 309.5 | 0.129  |          |
| 247 | Opsin-3                                         | VYNPVIYVF   | A*24:02 | 5.3   | 0.173  | Q9H1Y3   |
|     |                                                 |             | C*07:02 | 33.3  | 0.173  |          |
| 248 | ORM1-like protein 2                             | VLLPKLPQF   | A*24:02 | 481.0 | -0.312 | Q53FV1   |
| 249 | Oxysterol-binding protein-<br>related protein 2 | EYMEHVYLI   | A*24:02 | 6.9   | 0.105  | Q9H1P3   |
|     |                                                 |             | C*07:02 | 483.4 | 0.105  |          |
| 250 | Paired amphipathic helix<br>protein Sin3a       | VYAQVARLF   | A*24:02 | 8.3   | 0.010  | Q96ST3   |
|     |                                                 |             | C*07:02 | 78.9  | 0.010  |          |
| 251 | Paired amphipathic helix<br>protein Sin3b       | VFTEVANLF   | A*24:02 | 33.1  | 0.178  | O75182   |
| 252 | Partitioning defective 3<br>homolog B           | VYFPDQHINF  | A*24:02 | 17.7  | 0.075  | Q8TEW8 † |
|     |                                                 |             | C*07:02 | 395.0 | 0.075  |          |
| 253 | Phospholipase A-2-activating<br>protein         | IYFPKKEAVTF | A*24:02 | 48.7  | -0.201 | Q9Y263   |
| 254 | Plectin                                         | IYLEKLKTI   | A*24:02 | 30.5  | -0.283 | Q15149   |
| 255 | Polycystin family receptor for<br>egg jelly     | SYILTHFIF   | A*24:02 | 10.4  | 0.277  | Q9NTG1   |
|     |                                                 |             | C*07:02 | 442.6 | 0.277  |          |
| 256 | Pre-mRNA-processing-splicing<br>factor 8        | NYLHLDYNF   | A*24:02 | 8.5   | 0.032  | Q6P2Q9   |
| 257 | Probable C-<br>mannosyltransferase DPY19L4      | NYSPYVNYF   | A*24:02 | 13.5  | -0.037 | Q7Z388 † |

|     |                                                                               |             |         |       |        |        |   |
|-----|-------------------------------------------------------------------------------|-------------|---------|-------|--------|--------|---|
|     |                                                                               |             | C*07:02 | 26.2  | -0.037 |        |   |
| 258 | Probable dolichyl pyrophosphate Glc1Man9GlcNAc2 alpha-1,3-glucosyltransferase | HYSLFPLL    | A*24:02 | 9.6   | 0.023  | Q9BVK2 |   |
|     |                                                                               |             | C*07:02 | 122.5 | 0.023  |        |   |
| 259 | Programmed cell death protein 6                                               | KYITDWQNVF  | A*24:02 | 11.4  | 0.229  | O75340 | † |
| 260 | Prohibitin 1                                                                  | TYLPAGQSVLL | A*24:02 | 183.8 | -0.184 | P35232 |   |
| 261 | Prostaglandin E synthase 3                                                    | KWYDRRDYVF  | A*24:02 | 30.3  | 0.164  | Q15185 |   |
| 262 | Proteasome subunit beta type-7                                                | VYAPPVGGFSF | A*24:02 | 19.7  | 0.098  | Q99436 |   |
| 263 | Protein AATF (Apoptosis-antagonizing transcription factor)                    | PQPDVFPLF   | A*24:02 | 257.4 | 0.153  | Q9NY61 | † |
| 264 | Protein CIP2A                                                                 | TYGKIDLGF   | A*24:02 | 27.5  | -0.045 | Q8TCG1 |   |
| 265 | Protein FAM104A                                                               | LYFHINQTL   | A*24:02 | 45.7  | 0.119  | Q969W3 |   |
|     |                                                                               |             | C*07:02 | 83.2  | 0.119  |        |   |
| 266 | Protein mono-ADP-ribosyltransferase PARP3                                     | FYTVIPHNF   | A*24:02 | 10.8  | 0.197  | Q9Y6F1 |   |
|     |                                                                               |             | C*07:02 | 54.3  | 0.197  |        |   |
| 267 | Protein Niban 1                                                               | VYEEILHQI   | A*24:02 | 47.8  | 0.212  | Q9BZQ8 | † |
| 268 | Protein PPP4R3C                                                               | AYIPKLLQL   | A*24:02 | 97.2  | -0.265 | Q6ZMV5 |   |
|     |                                                                               |             | C*07:02 | 118.5 | -0.265 |        |   |
| 269 | Protein SGT1 homolog                                                          | NYAAALET    | A*24:02 | 10.3  | 0.187  | Q9Y2Z0 |   |
|     |                                                                               |             | C*07:02 | 214.5 | 0.187  |        |   |
| 270 | Protein unc-119 homolog B                                                     | IYSIDFTRF   | A*24:02 | 15.9  | 0.275  | A6NIH7 |   |
|     |                                                                               |             | C*07:02 | 432.8 | 0.275  |        |   |

|     |                                                                 |           |         |       |        |        |   |
|-----|-----------------------------------------------------------------|-----------|---------|-------|--------|--------|---|
| 271 | Protein zwilch homolog                                          | FYSRLLQKF | A*24:02 | 13.1  | -0.247 | Q9H900 |   |
|     |                                                                 |           | C*07:02 | 102.0 | -0.247 |        |   |
| 272 | Pterin-4-alpha-carbinolamine dehydratase                        | VYNKVHITL | A*24:02 | 25.4  | -0.013 | P61457 |   |
|     |                                                                 |           | C*07:02 | 74.5  | -0.013 |        |   |
| 273 | Retinoic acid-induced protein 3                                 | LYAPYSTHF | A*24:02 | 9.4   | -0.106 | Q8NFJ5 |   |
|     |                                                                 |           | C*07:02 | 38.6  | -0.106 |        |   |
| 274 | Selenoprotein N                                                 | SYLPFTEAF | A*24:02 | 9.0   | 0.243  | Q9NZV5 |   |
|     |                                                                 |           | C*07:02 | 59.9  | 0.243  |        |   |
| 275 | Semaphorin-7A                                                   | AYDDKIYYF | A*24:02 | 126.2 | -0.060 | O75326 |   |
|     |                                                                 |           | C*07:02 | 200.9 | -0.060 |        |   |
| 276 | Separin                                                         | LYSNIAFNL | A*24:02 | 30.3  | 0.201  | Q14674 |   |
|     |                                                                 |           | C*07:02 | 223.9 | 0.201  |        |   |
| 277 | Serine--tRNA ligase, cytoplasmic                                | YFLKGVLVF | A*24:02 | 51.4  | -0.134 | P49591 |   |
| 278 | SET and MYND domain-containing protein 4                        | NYNAVFNLL | A*24:02 | 30.8  | 0.176  | Q8IYR2 |   |
|     |                                                                 |           | C*07:02 | 96.3  | 0.176  |        |   |
| 279 | Short transient receptor potential channel 4-associated protein | SYADQMFL  | A*24:02 | 33.5  | -0.151 | Q8TEL6 |   |
|     |                                                                 |           | C*07:02 | 62.4  | -0.151 |        |   |
| 280 | Signal peptidase complex subunit 2                              | KYVENFGLI | A*24:02 | 12.3  | 0.240  | Q15005 |   |
| 281 | Small ribosomal subunit protein uS8                             | LLPSRQFGF | A*24:02 | 306.8 | -0.110 | P62244 |   |
| 282 | Sodium bicarbonate cotransporter 3                              | VYIGVHVPF | A*24:02 | 14.8  | 0.176  | Q9Y6M7 | † |

|     |                                                      |             |         |       |        |        |   |
|-----|------------------------------------------------------|-------------|---------|-------|--------|--------|---|
|     |                                                      |             | C*07:02 | 206.4 | 0.176  |        |   |
| 283 | Splicing factor 3B subunit 3                         | NYISGIQTI   | A*24:02 | 12.8  | -0.040 | Q15393 |   |
|     |                                                      |             | C*07:02 | 214.7 | -0.040 |        |   |
| 284 | StAR-related lipid transfer protein 7, mitochondrial | TYTDVTPRQFF | A*24:02 | 105.3 | 0.121  | Q9NQZ5 | † |
| 285 | Terminal nucleotidyltransferase 4A                   | LYGRNFNYL   | A*24:02 | 33.1  | 0.159  | Q5XG87 | † |
|     |                                                      |             | C*07:02 | 370.5 | 0.159  |        |   |
| 286 | Terminal uridylyltransferase 4                       | VYEYVVERF   | A*24:02 | 34.5  | 0.223  | Q5TAX3 |   |
| 287 | Thimet oligopeptidase                                | KYPHYFPLL   | A*24:02 | 7.8   | 0.120  | P52888 |   |
|     |                                                      |             | C*07:02 | 117.5 | 0.120  |        |   |
| 288 | Thioredoxin-like protein 4B                          | SYIPSTVFF   | A*24:02 | 9.3   | 0.011  | Q9NX01 |   |
|     |                                                      |             | C*07:02 | 38.7  | 0.011  |        |   |
| 289 | Trafficking protein particle complex subunit 1       | SYVRSLPFF   | A*24:02 | 7.9   | -0.047 | Q9Y5R8 |   |
|     |                                                      |             | C*07:02 | 244.7 | -0.047 |        |   |
| 290 | Transcription elongation factor SPT5                 | RYSRKGFLF   | A*24:02 | 5.6   | -0.087 | O00267 |   |
|     |                                                      |             | C*07:02 | 219.7 | -0.087 |        |   |
| 291 | tRNA-splicing endonuclease subunit Sen34             | VYPGDPLRF   | A*24:02 | 47.5  | 0.063  | Q9BSV6 | † |
|     |                                                      |             | C*07:02 | 400.6 | 0.063  |        |   |
| 292 | Tumor necrosis factor receptor superfamily member 21 | VYSHLPDLL   | A*24:02 | 66.7  | -0.030 | O75509 | † |
| 293 | Tyrosine-protein kinase BAZ1B                        | RYQDIIHSI   | A*24:02 | 6.3   | 0.170  | Q9UIG0 |   |
|     |                                                      |             | C*07:02 | 166.4 | 0.170  |        |   |
| 294 | Tyrosine-protein kinase receptor UFO                 | VYTSKSDVWSF | A*24:02 | 56.0  | -0.374 | P30530 |   |

|     |                                                           |             |         |       |        |        |   |
|-----|-----------------------------------------------------------|-------------|---------|-------|--------|--------|---|
| 295 | U5 small nuclear ribonucleoprotein 200 kDa helicase       | VYMDWYEKF   | A*24:02 | 2.9   | 0.136  | O75643 |   |
|     |                                                           |             | C*07:02 | 87.7  | 0.136  |        |   |
| 296 | Ubiquitin-like FUBI-ribosomal protein eS30 fusion protein | RFVNVVPTF   | A*24:02 | 17.9  | 0.099  | P62861 | † |
| 297 | Ubiquitin-like modifier-activating enzyme 1               | SYKNGFLNL   | A*24:02 | 63.3  | 0.054  | P22314 |   |
|     |                                                           |             | C*07:02 | 134.2 | 0.054  |        |   |
| 298 | Unconventional myosin-Ic                                  | VYSRTFTWL   | A*24:02 | 34.7  | 0.309  | O00159 |   |
|     |                                                           |             | C*07:02 | 275.1 | 0.309  |        |   |
| 299 | Vacuolar protein sorting-associated protein 37B           | KYQELQVLF   | A*24:02 | 7.0   | -0.028 | Q9H9H4 |   |
|     |                                                           |             | C*07:02 | 298.4 | -0.028 |        |   |
| 300 | V-type proton ATPase subunit d 1                          | AYLESFYKF   | A*24:02 | 4.6   | -0.083 | P61421 |   |
|     |                                                           |             | C*07:02 | 424.5 | -0.083 |        |   |
| 301 | Zinc phosphodiesterase ELAC protein 2                     | RYQQWMERF   | A*24:02 | 5.6   | 0.011  | Q9BQ52 |   |
|     |                                                           |             | C*07:02 | 454.8 | 0.011  |        |   |
| 302 | 26S proteasome non-ATPase regulatory subunit 12           | RPKDPNNLL   | B*07:02 | 13.6  | -0.077 | O00232 |   |
| 303 | Cyclin-G-associated kinase                                | QPYGGFLDI   | B*07:02 | 213.9 | 0.180  | O14976 |   |
| 304 | Cysteine desulfurase                                      | GPKGVGAIYI  | B*07:02 | 464.1 | 0.184  | Q9Y697 |   |
| 305 | DNA replication licensing factor MCM6                     | LPRGSIPRSL  | B*07:02 | 6.6   | -0.044 | Q14566 |   |
| 306 | DNA replication licensing factor MCM7                     | RPADVIFATV  | B*07:02 | 63.0  | 0.371  | P33993 |   |
| 307 | Heat shock protein beta-1                                 | MPKLATQSNEI | B*07:02 | 245.6 | -0.221 | P04792 |   |
| 308 | Integrin beta-4                                           | GPRPSPWARL  | B*07:02 | 15.7  | 0.106  | P16144 |   |

|     |                                                             |              |         |       |        |        |   |
|-----|-------------------------------------------------------------|--------------|---------|-------|--------|--------|---|
| 309 | Large ribosomal subunit protein uL23                        | RPDGEKKAYVRL | B*07:02 | 355.0 | -0.182 | P62750 |   |
| 310 | Lipid droplet-regulating VLDL assembly factor AUP1          | LPHVPLGVI    | B*07:02 | 43.2  | 0.084  | Q9Y679 |   |
| 311 | Maestro heat-like repeat-containing protein family member 6 | APRPARPPP    | B*07:02 | 41.0  | 0.077  | A6NGR9 |   |
| 312 | Neuroplastin                                                | LPSALALSLL   | B*07:02 | 67.4  | -0.144 | Q9Y639 |   |
| 313 | Poly(rC)-binding protein 2                                  | RPKPSSSPVIF  | B*07:02 | 17.8  | -0.462 | Q15366 |   |
| 314 | Proteasome subunit alpha type-1                             | RPYGVGLLI    | B*07:02 | 35.9  | 0.089  | P25786 | † |
|     |                                                             |              | B*59:01 | 221.0 | 0.089  |        |   |
| 315 | SEC14-like protein 1                                        | APHEILIQI    | B*07:02 | 461.4 | 0.275  | Q92503 |   |
| 316 | Serine protease HTRA1                                       | IPRAALLPLL   | B*07:02 | 5.4   | 0.057  | Q92743 |   |
| 317 | SH2 domain-containing protein 3A                            | RPRPGRPTA    | B*07:02 | 5.0   | 0.101  | Q9BRG2 |   |
| 318 | Solute carrier family 25 member 3                           | QPRRPRNLAA   | B*07:02 | 22.8  | 0.116  | Q00325 |   |
| 319 | Trafficking protein particle complex subunit 4              | RPRLTSNEKL   | B*07:02 | 3.4   | -0.165 | Q9Y296 |   |
| 320 | Transcription elongation factor SPT4                        | LPQGIVREL    | B*07:02 | 36.2  | 0.267  | P63272 |   |
| 321 | Transmembrane protein 214                                   | GPRLPWTRL    | B*07:02 | 8.9   | 0.266  | Q6NUQ4 |   |
| 322 | Tricarboxylate transport protein, mitochondrial             | APRAPRALAAA  | B*07:02 | 21.4  | 0.179  | P53007 |   |
| 323 | Zinc finger protein 526                                     | APRLPITGL    | B*07:02 | 5.7   | 0.173  | Q8TF50 |   |
| 324 | Zinc finger protein 843                                     | GLPAVPAVPL   | B*07:02 | 91.5  | 0.130  | Q8N446 |   |
| 325 | F-box only protein 33                                       | LPSELIVHI    | B*59:01 | 198.4 | 0.215  | Q7Z6M2 |   |
| 326 | FIGNL1-interacting regulator of recombination and mitosis   | LPSSVLHII    | B*59:01 | 127.8 | -0.085 | Q9NSG2 |   |
|     |                                                             |              | B*07:02 | 210.2 | -0.085 |        |   |

|     |                                                              |              |         |       |        |        |
|-----|--------------------------------------------------------------|--------------|---------|-------|--------|--------|
| 327 | Galectin-3                                                   | FPFESGKPFKI  | B*59:01 | 367.7 | -0.237 | P17931 |
| 328 | Lathosterol oxidase                                          | LPWISILTV    | B*59:01 | 110.7 | 0.183  | O75845 |
| 329 | Leucine--tRNA ligase,<br>cytoplasmic                         | LPFEPVPVI    | B*59:01 | 231.4 | 0.182  | Q9P2J5 |
| 330 | Vacuolar protein sorting-<br>associated protein 26C          | IPFEFPLHL    | B*59:01 | 250.5 | 0.252  | O14972 |
| 331 | HLA class I histocompatibility<br>antigen, A alpha chain     | VMAPRTLTL    | C*01:02 | 169.5 | 0.060  | P04439 |
|     |                                                              |              | A*02:06 | 205.9 | 0.073  |        |
|     |                                                              |              | A*24:02 | 297.7 | 0.073  |        |
|     |                                                              |              | C*07:02 | 232.9 | 0.073  |        |
| 332 | Threonylcarbamoyl-AMP<br>synthase                            | YGLLPASHASYL | C*01:02 | 112.9 | -0.257 | Q86U90 |
| 333 | 5'-nucleotidase domain-<br>containing protein 1              | YYNPPLVL     | C*07:02 | 20.6  | -0.017 | Q5TFE4 |
|     |                                                              |              | C*01:02 | 167.9 | -0.013 |        |
| 334 | Cadherin-like and PC-esterase<br>domain-containing protein 1 | IYREDRPSL    | C*07:02 | 304.4 | 0.082  | A4D0V7 |
| 335 | Cyclin-dependent kinases<br>regulatory subunit 2             | KYFDEHYEY    | C*07:02 | 73.8  | 0.244  | P33552 |
|     |                                                              |              | A*24:02 | 462.1 | 0.244  |        |
| 336 | CYFIP-related Rac1 interactor<br>B                           | IYNQVNVVL    | C*07:02 | 85.9  | -0.026 | Q9NUQ9 |
|     |                                                              |              | A*24:02 | 136.5 | -0.026 |        |
| 337 | Elongin-A                                                    | NYRPLPSLEL   | C*07:02 | 441.2 | -0.123 | Q14241 |
| 338 | Microtubule-associated protein<br>1S                         | LYDELRNLL    | C*07:02 | 200.4 | 0.134  | Q66K74 |
| 339 | Probable phospholipid-<br>transporting ATPase IIB            | YYEHEFVEL    | C*07:02 | 118.4 | 0.366  | O43861 |
|     |                                                              |              | A*24:02 | 366.8 | 0.366  |        |

|     |                                                         |           |         |       |        |        |
|-----|---------------------------------------------------------|-----------|---------|-------|--------|--------|
| 340 | Protein ITPRID2                                         | LYENTFQEL | C*07:02 | 145.0 | 0.135  | P28290 |
|     |                                                         |           | A*24:02 | 280.0 | 0.135  |        |
| 341 | Protein transport protein Sec61 subunit alpha isoform 1 | QYNTYPIKL | C*07:02 | 412.0 | 0.009  | P61619 |
| 342 | Structural maintenance of chromosomes protein 4         | HYKPTPLYF | C*07:02 | 33.1  | -0.065 | Q9NTJ3 |
|     |                                                         |           | A*24:02 | 41.0  | -0.065 |        |
| 343 | V-type proton ATPase subunit d 1                        | LYPEGLAQL | C*07:02 | 180.0 | 0.085  | P61421 |
|     |                                                         |           | A*24:02 | 211.1 | 0.085  |        |

---

#immunogenicity scores were calculated via the IEDB immunogenicity tool and allele-specific anchor residues were masked. Positive scores indicate more immunogenic peptides, whereas negative scores designate less immunogenic peptides

† peptide sequence identified in two of three mass spectrometry replicates

‡ peptide sequence identified in three of three mass spectrometry replicates
