# Supplementary material for: Gemcitabine Modulates HLA-I Regulation to Improve Tumor Antigen Presentation by Pancreatic Cancer Cells
Source: MDPI journal article supplement (doi:10.3390/ijms25063211), 2024-03-11
Supplement: s1 [file s1]

**Table S2. Gemcitabine-exclusive HLA-I peptides mapped to multiple source proteins.**

| <i>Source Proteins</i>                                                                                                                                                                                                                                   | <i>Peptide</i> | <i>Assigned HLA-I allotype(s)</i> | <i>IC50 (nM)</i> | <i>Immunogenicity score(s)<sup>#</sup></i> | <i>Accession numbers</i>                       | <i>Repeated peptide sequence</i> |
|----------------------------------------------------------------------------------------------------------------------------------------------------------------------------------------------------------------------------------------------------------|----------------|-----------------------------------|------------------|--------------------------------------------|------------------------------------------------|----------------------------------|
| 1 Putative high mobility group protein B1-like 1, High mobility group protein B1, High mobility group protein B2                                                                                                                                         | APKRPPSAF      | B*07:02                           | 11.3             | -0.156                                     | B2RPK0<br>P09429<br>P26583                     |                                  |
| 2 Heterogeneous nuclear ribonucleoprotein C-like 2, Heterogeneous nuclear ribonucleoprotein C-like 4, Heterogeneous nuclear ribonucleoprotein C-like 3, Heterogeneous nuclear ribonucleoprotein C-like 1, Heterogeneous nuclear ribonucleoproteins C1/C2 | RVFIGNLNTL     | A*02:06                           | 157.1            | 0.205                                      | B2RXH8<br>P0DMR1<br>B7ZW38<br>O60812<br>P07910 | †                                |
| 3 Protein transport protein Sec24A, Protein transport protein Sec24B                                                                                                                                                                                     | TYINPFVSF      | A*24:02                           | 10.5             | 0.074                                      | O95486<br>O95487                               |                                  |
|                                                                                                                                                                                                                                                          |                | C*07:02                           | 101.1            | 0.074                                      |                                                |                                  |
| 4 Mitogen-activated protein kinase kinase kinase 4, Misshapen-like kinase 1, TRAF2 and NCK-interacting protein kinase                                                                                                                                    | AWAPKPYHKF     | A*24:02                           | 80.8             | -0.321                                     | O95819<br>Q8N4C8<br>Q9UKE5                     |                                  |
| 5 Ferritin heavy chain, Ferritin, mitochondrial                                                                                                                                                                                                          | RQINLELYA      | A*02:06                           | 50.4             | 0.109                                      | P02794<br>Q8N4E7                               |                                  |
| 6 Guanine nucleotide-binding protein G(i) subunit alpha-2, Guanine nucleotide-binding protein G(z) subunit alpha                                                                                                                                         | YYLNDLERI      | A*24:02                           | 22.1             | 0.116                                      | P04899<br>P19086                               | †                                |

|    |                                                                                                                                                                                                                                                                     |             |         |       |        |                                                                              |   |
|----|---------------------------------------------------------------------------------------------------------------------------------------------------------------------------------------------------------------------------------------------------------------------|-------------|---------|-------|--------|------------------------------------------------------------------------------|---|
| 7  | Sodium/potassium-transporting ATPase subunit alpha-1, Sodium/potassium-transporting ATPase subunit alpha-2, Sodium/potassium-transporting ATPase subunit alpha-3, Potassium-transporting ATPase alpha chain 2, Sodium/potassium-transporting ATPase subunit alpha-4 | NVPEGLLATV  | A*02:06 | 86.2  | 0.165  | P05023<br>P50993<br>P13637<br>P54707<br>Q13733                               | † |
| 8  | Alpha-enolase, Gamma-enolase, Beta-enolase                                                                                                                                                                                                                          | FIADLVVGL   | A*02:06 | 4.0   | 0.118  | P06733<br>P09104<br>P13929                                                   |   |
| 9  | Tubulin beta chain, Tubulin beta-4B chain, Tubulin beta-2B chain, Tubulin beta-2A chain, Tubulin beta-3 chain, Tubulin beta-4A chain, Tubulin beta-6 chain, Tubulin beta-1 chain                                                                                    | FVEWIPNNV   | A*02:06 | 58.7  | 0.365  | P07437<br>P68371<br>Q9BVA1<br>Q13885<br>Q13509<br>P04350<br>Q9BUF5<br>Q9H4B7 |   |
| 10 | Heat shock protein HSP 90-alpha, Heat shock protein HSP 90-beta, Heat shock protein HSP 90-alpha A2, Putative heat shock protein HSP 90-beta 2                                                                                                                      | FQAEIAQLMSL | A*02:06 | 12.9  | -0.087 | P07900<br>P08238<br>Q14568<br>Q58FF8                                         |   |
| 11 | Heat shock protein HSP 90-alpha, Heat shock protein HSP 90-beta, Heat shock protein HSP 90-alpha A2, Putative heat shock protein HSP 90-beta 2                                                                                                                      | FQAEIAQLM   | A*02:06 | 7.2   | 0.176  | P07900<br>P08238<br>Q14568<br>Q58FF8                                         | † |
|    |                                                                                                                                                                                                                                                                     |             | C*07:02 | 276.0 | 0.176  |                                                                              |   |
| 12 | U2 small nuclear ribonucleoprotein B", U1 small nuclear ribonucleoprotein A                                                                                                                                                                                         | NQFPGFKEV   | A*02:06 | 15.1  | 0.047  | P08579<br>P09012                                                             |   |
| 13 | Heat shock 70 kDa protein 1A, Heat shock 70 kDa protein 1B, Heat shock 70 kDa protein 1-like                                                                                                                                                                        | LTIDDGIFEV  | A*02:06 | 6.7   | 0.403  | P0DMV8<br>P0DMV9<br>P34931                                                   |   |
| 14 | Translationally-controlled tumor protein, Putative translationally-controlled tumor protein-like protein TPT1P8                                                                                                                                                     | EMFSDIYKI   | A*02:06 | 184.5 | -0.111 | P13693<br>Q9HAU6                                                             |   |
| 15 | Plastin-3, Plastin-2                                                                                                                                                                                                                                                | ALPEDLVEV   | A*02:06 | 5.1   | 0.202  | P13797<br>P13796                                                             |   |

|    |                                                                                                                  |             |         |       |        |                            |   |
|----|------------------------------------------------------------------------------------------------------------------|-------------|---------|-------|--------|----------------------------|---|
| 16 | Receptor-type tyrosine-protein phosphatase delta, Receptor-type tyrosine-protein phosphatase S                   | GVVDIFQTV   | A*02:06 | 5.3   | 0.200  | P23468<br>Q13332           |   |
| 17 | Rab proteins geranylgeranyltransferase component A 1, Rab proteins geranylgeranyltransferase component A 2       | SYYGGNWASF  | A*24:02 | 7.5   | 0.204  | P24386<br>P26374           |   |
|    |                                                                                                                  |             | C*07:02 | 169.2 | 0.204  |                            |   |
| 18 | DNA dC->dU-editing enzyme APOBEC-3A, DNA dC->dU-editing enzyme APOBEC-3B                                         | LQLDPAQIYRV | A*02:06 | 57.0  | 0.086  | P31941<br>Q9UH17           |   |
| 19 | GMP reductase 1, GMP reductase 2                                                                                 | GYSEHFVEF   | A*24:02 | 32.7  | 0.282  | P36959<br>Q9P2T1           |   |
|    |                                                                                                                  |             | C*07:02 | 113.3 | 0.282  |                            |   |
| 20 | Lysine-specific demethylase 5C, Lysine-specific demethylase 5D                                                   | NYLDQIAKF   | A*24:02 | 33.2  | -0.062 | P41229<br>Q9BY66           | † |
|    |                                                                                                                  |             | C*07:02 | 232.4 | -0.062 |                            |   |
| 21 | Small ribosomal subunit protein eS27, Ribosomal protein eS27-like                                                | TVFSHAQTV   | A*02:06 | 53.6  | -0.135 | P42677<br>Q71UM5           |   |
| 22 | Ribose-phosphate pyrophosphokinase 1, Ribose-phosphate pyrophosphokinase 2, Ribose-phosphate pyrophosphokinase 3 | VYAILTHGI   | A*24:02 | 20.3  | 0.219  | P60891<br>P11908<br>P21108 |   |
| 23 | Ubiquitin-conjugating enzyme E2 D3, Ubiquitin-conjugating enzyme E2 D2                                           | SQWSPALTI   | A*02:06 | 24.8  | -0.055 | P61077<br>P62837           |   |
| 24 | Ubiquitin-conjugating enzyme E2 D3, Ubiquitin-conjugating enzyme E2 D2, Ubiquitin-conjugating enzyme E2 D4       | YPFKPPKVAF  | B*07:02 | 44.9  | -0.346 | P61077<br>P62837<br>Q9Y2X8 |   |
| 25 | Protein transport protein Sec61 subunit alpha isoform 1, Protein transport protein Sec61 subunit alpha isoform 2 | RYIPTAAAF   | A*24:02 | 10.2  | 0.163  | P61619<br>Q9H9S3           |   |
|    |                                                                                                                  |             | C*07:02 | 64.3  | 0.163  |                            |   |

|    |                                                                                                                                                     |             |         |       |        |                            |   |
|----|-----------------------------------------------------------------------------------------------------------------------------------------------------|-------------|---------|-------|--------|----------------------------|---|
| 26 | 14-3-3 protein gamma, 14-3-3 protein eta                                                                                                            | QYESKVFYL   | A*24:02 | 393.7 | -0.208 | P61981<br>Q04917           |   |
| 27 | Small ribosomal subunit protein eS26, Putative ribosomal protein eS26-like                                                                          | APRPPPKPM   | B*07:02 | 5.2   | -0.204 | P62854<br>Q5JNZ5           |   |
| 28 | Elongation factor 1-alpha 1, Putative elongation factor 1-alpha-like 3, Elongation factor 1-alpha 2                                                 | KYAWVLDKL   | A*24:02 | 34.8  | 0.158  | P68104<br>Q5VTE0<br>Q05639 | ‡ |
| 29 | Elongation factor 1-alpha 1, Putative elongation factor 1-alpha-like 3, Elongation factor 1-alpha 2                                                 | RPTDKPLRL   | B*07:02 | 68.9  | -0.165 | P68104<br>Q5VTE0<br>Q05639 |   |
| 30 | Inositol 1, 4, 5-trisphosphate receptor type 2, Inositol 1, 4, 5-trisphosphate receptor type 3, Inositol 1, 4, 5-trisphosphate receptor type 1      | IFGVIIDTF   | A*24:02 | 47.4  | 0.349  | Q14571<br>Q14573<br>Q14643 |   |
| 31 | Septin-2, Septin-5, Septin-4                                                                                                                        | FISPFHGHL   | A*02:06 | 13.9  | 0.128  | Q15019<br>Q99719<br>O43236 |   |
| 32 | Putative Dol-P-Glc:Glc(2)Man(9)GlcNAc(2)-PP-Dol alpha-1,2-glucosyltransferase, Dol-P-Glc:Glc(2)Man(9)GlcNAc(2)-PP-Dol alpha-1,2-glucosyltransferase | LLFSAFSRA   | A*02:06 | 41.3  | -0.090 | Q5I7T1<br>Q5BKT4           |   |
| 33 | tRNA N(3)-methylcytidine methyltransferase METTL2B, tRNA N(3)-methylcytidine methyltransferase METTL2A                                              | FFKDRHWLF   | C*07:02 | 58.6  | 0.214  | Q6P1Q9<br>Q96IZ6           |   |
|    |                                                                                                                                                     |             | A*24:02 | 63.9  | 0.214  |                            |   |
| 34 | Ribonucleoside-diphosphate reductase subunit M2 B, Ribonucleoside-diphosphate reductase subunit M2                                                  | KPSEERVREI  | B*07:02 | 188.8 | 0.336  | Q7LG56<br>P31350           |   |
| 35 | Putative ribosomal protein uL10-like, Large ribosomal subunit protein uL10                                                                          | FLADPSAFVAA | A*02:06 | 37.2  | 0.069  | Q8NHW5<br>P05388           |   |
| 36 | Folliculin-interacting protein 1, Folliculin-interacting protein 2                                                                                  | PYNPLWAQL   | A*24:02 | 104.5 | 0.150  | Q8TF40<br>Q9P278           |   |

|    |                                                                                                                                                    |             |         |       |        |                                      |   |
|----|----------------------------------------------------------------------------------------------------------------------------------------------------|-------------|---------|-------|--------|--------------------------------------|---|
| 37 | SEC14-like protein 1, SEC14-like protein 5                                                                                                         | NYPETLGRLLI | A*24:02 | 371.3 | 0.190  | Q92503<br>O43304                     |   |
| 38 | MORF4 family-associated protein 1-like 1, MORF4 family-associated protein 1                                                                        | FLLPVINEM   | A*02:06 | 6.3   | 0.204  | Q96HT8<br>Q9Y605                     |   |
|    |                                                                                                                                                    |             | C*07:02 | 397.2 | 0.204  |                                      |   |
| 39 | Metastasis-associated protein MTA3, Metastasis-associated protein MTA2                                                                             | RQIDQFLVV   | A*02:06 | 4.0   | 0.078  | Q9BTC8<br>O94776                     |   |
| 40 | Putative FERM domain-containing protein FRMD8P1, FERM domain-containing protein 8                                                                  | RAADVLYL    | A*02:06 | 13.4  | 0.097  | Q9BZ68<br>Q9BZ67                     | ‡ |
| 41 | Ribosomal protein S6 kinase alpha-6, Ribosomal protein S6 kinase alpha-2, Ribosomal protein S6 kinase alpha-1, Ribosomal protein S6 kinase alpha-3 | FQTEGKLYL   | A*02:06 | 11.0  | -0.068 | Q9UK32<br>Q15349<br>Q15418<br>P51812 |   |
|    |                                                                                                                                                    |             | C*07:02 | 458.5 | -0.068 |                                      |   |
| 42 | Guanine nucleotide-binding protein-like 3-like protein, Thioredoxin-like protein 4B                                                                | VYLDKFIRL   | A*24:02 | 42.9  | 0.061  | Q9NVN8<br>Q9NX01                     | † |
|    |                                                                                                                                                    |             | C*07:02 | 197.5 | 0.062  |                                      |   |

#immunogenicity scores were calculated via the IEDB immunogenicity tool and allele-specific anchor residues were masked. Positive scores indicate more immunogenic peptides, whereas negative scores designate less immunogenic peptides

† peptide sequence identified in two of three mass spectrometry replicates

‡ peptide sequence identified in three of three mass spectrometry replicates
