# Supplementary material for: Gemcitabine Modulates HLA-I Regulation to Improve Tumor Antigen Presentation by Pancreatic Cancer Cells
Source: MDPI journal article supplement (doi:10.3390/ijms25063211), 2024-03-11
Supplement: s1 [file s1]

**Table S6. HLA typing of pancreatic cancer cell lines.**

| <i>Cell line</i> | <i>Expressed HLA-I molecules</i>                                                       | <i>Typing source</i>                                      |
|------------------|----------------------------------------------------------------------------------------|-----------------------------------------------------------|
| S2-013           | HLA-A*02:06<br>HLA-A*24:02<br>HLA-B*07:02<br>HLA-B*59:01<br>HLA-C*01:02<br>HLA-C*07:02 | Molecular Diagnostics Histocompatibility Lab <sup>#</sup> |
| T3M-4            | HLA-A*02<br>HLA-A*02<br>HLA-B*40<br>HLA-B*52<br>HLA-C*03<br>HLA-C*12                   | Molecular Diagnostics Histocompatibility Lab <sup>#</sup> |
| PANC-1           | HLA-A*02:01<br>HLA-A*11:01<br>HLA-B*38:01<br>HLA-C*12:03                               | Tron Cell Line Portal <sup>†</sup>                        |

<sup>#</sup> Molecular Diagnostics Histocompatibility Lab at the University of Nebraska Medical center performed Next Generation Sequencing using the CareDx® AlloSeq™ Tx 17 assay (Illumina MiSeq instruments) on indicated cell types. Sequencing data was compared to the IMGT/HLA database to determine the HLA type for each sample. High resolution and intermediate typing were conducted for the S2-013 and T3M-4 cells, respectively.

<sup>†</sup> Tron Cell Line Portal "<http://celllines.tron-mainz.de/> (accessed 10 December 2021)"
