# Supplementary material for: Gemcitabine Modulates HLA-I Regulation to Improve Tumor Antigen Presentation by Pancreatic Cancer Cells
Source: MDPI journal article supplement (doi:10.3390/ijms25063211), 2024-03-11
Supplement: s1 [file s1]

**Table S5. Gene Ontology analysis of source proteins which generated gemcitabine-exclusive HLA-I peptides.**

| <i>Ontology domain</i> | <i>GO term ID</i> | <i>Term</i>                                                                         | <i>Count</i> | <i>P-value</i>         |
|------------------------|-------------------|-------------------------------------------------------------------------------------|--------------|------------------------|
| MF                     | GO:0005515        | protein binding                                                                     | 377          | 1.44x10 <sup>-18</sup> |
| MF                     | GO:0017111        | ribonucleoside triphosphate<br>phosphatase activity                                 | 51           | 2.05x10 <sup>-12</sup> |
| MF                     | GO:0003723        | RNA binding                                                                         | 107          | 7.39x10 <sup>-6</sup>  |
| MF                     | GO:0008554        | P-type sodium transporter activity                                                  | 5            | 4.07x10 <sup>-5</sup>  |
| MF                     | GO:0003697        | single-stranded DNA binding                                                         | 14           | 1.53x10 <sup>-4</sup>  |
| MF                     | GO:0140640        | catalytic activity, acting on a nucleic acid                                        | 33           | 2.75x10 <sup>-4</sup>  |
| MF                     | GO:0045182        | translation regulator activity                                                      | 15           | 4.57x10 <sup>-4</sup>  |
| MF                     | GO:0004711        | ribosomal protein S6 kinase activity                                                | 4            | 3.32x10 <sup>-3</sup>  |
| MF                     | GO:0004748        | ribonucleoside-diphosphate reductase<br>activity, thioredoxin disulfide as acceptor | 3            | 4.95x10 <sup>-3</sup>  |
| MF                     | GO:0005220        | inositol 1,4,5-trisphosphate-sensitive<br>calcium-release channel activity          | 3            | 4.95x10 <sup>-3</sup>  |
| MF                     | GO:0000287        | magnesium ion binding                                                               | 16           | 1.04x10 <sup>-2</sup>  |
| MF                     | GO:0004634        | phosphopyruvate hydratase activity                                                  | 3            | 1.95x10 <sup>-2</sup>  |
| MF                     | GO:0097718        | disordered domain specific binding                                                  | 6            | 2.80x10 <sup>-2</sup>  |
| MF                     | GO:0008199        | ferric iron binding                                                                 | 4            | 2.94x10 <sup>-2</sup>  |
| MF                     | GO:0005200        | structural constituent of cytoskeleton                                              | 10           | 4.53x10 <sup>-2</sup>  |
| MF                     | GO:0004749        | ribose phosphate diphosphokinase<br>activity                                        | 3            | 4.80x10 <sup>-2</sup>  |
| MF                     | GO:0097100        | supercoiled DNA binding                                                             | 3            | 4.80x10 <sup>-2</sup>  |
| BP                     | GO:0006996        | organelle organization                                                              | 144          | 2.72x10 <sup>-17</sup> |
| BP                     | GO:0006518        | peptide metabolic process                                                           | 59           | 7.36x10 <sup>-14</sup> |
| BP                     | GO:0051641        | cellular localization                                                               | 121          | 7.32x10 <sup>-8</sup>  |
| BP                     | GO:0035556        | intracellular signal transduction                                                   | 86           | 5.63x10 <sup>-4</sup>  |
| BP                     | GO:0010248        | establishment or maintenance of<br>transmembrane electrochemical<br>gradient        | 5            | 1.99x10 <sup>-3</sup>  |
| BP                     | GO:0006015        | 5-phosphoribose 1-diphosphate<br>biosynthetic process                               | 4            | 3.70x10 <sup>-3</sup>  |
| BP                     | GO:0031396        | regulation of protein ubiquitination                                                | 16           | 5.70x10 <sup>-3</sup>  |
| BP                     | GO:0051301        | cell division                                                                       | 31           | 6.46x10 <sup>-3</sup>  |
| BP                     | GO:0032502        | developmental process                                                               | 164          | 7.70x10 <sup>-3</sup>  |
| BP                     | GO:0009056        | catabolic process                                                                   | 80           | 1.01x10 <sup>-2</sup>  |
| BP                     | GO:0030007        | intracellular potassium ion homeostasis                                             | 5            | 1.21x10 <sup>-2</sup>  |
| BP                     | GO:0006901        | vesicle coating                                                                     | 7            | 1.48x10 <sup>-2</sup>  |
| BP                     | GO:0036376        | sodium ion export across plasma<br>membrane                                         | 5            | 1.74x10 <sup>-2</sup>  |
| BP                     | GO:0034660        | ncRNA metabolic process                                                             | 29           | 2.11x10 <sup>-2</sup>  |
| BP                     | GO:0010033        | response to organic substance                                                       | 83           | 2.95x10 <sup>-2</sup>  |
| CC                     | GO:0005737        | cytoplasm                                                                           | 338          | 1.70x10 <sup>-28</sup> |

|    |            |                                             |    |                       |
|----|------------|---------------------------------------------|----|-----------------------|
| CC | GO:0045171 | intercellular bridge                        | 15 | $4.58 \times 10^{-8}$ |
| CC | GO:0030054 | cell junction                               | 84 | $5.35 \times 10^{-8}$ |
| CC | GO:0098687 | chromosomal region                          | 24 | $1.38 \times 10^{-4}$ |
| CC | GO:0000793 | condensed chromosome                        | 19 | $3.63 \times 10^{-4}$ |
| CC | GO:0030867 | rough endoplasmic reticulum<br>membrane     | 6  | $2.68 \times 10^{-3}$ |
| CC | GO:0090533 | cation-transporting ATPase complex          | 5  | $6.47 \times 10^{-3}$ |
| CC | GO:0002189 | ribose phosphate diphosphokinase<br>complex | 3  | $1.99 \times 10^{-2}$ |
| CC | GO:0005784 | Sec61 translocon complex                    | 3  | $3.93 \times 10^{-2}$ |

---

MF, Molecular Function; BP, Biological Process; Cellular Component, CC
