# Supplementary material for: Gemcitabine Modulates HLA-I Regulation to Improve Tumor Antigen Presentation by Pancreatic Cancer Cells
Source: MDPI journal article supplement (doi:10.3390/ijms25063211), 2024-03-11
Supplement: s1 [file s1]

**Table S4. Gene Ontology analysis of source proteins which generated no treatment-exclusive HLA-I peptides.**

| <i>Ontology domain</i> | <i>GO term ID</i> | <i>Term</i>                                               | <i>Count</i> | <i>P-value</i>         |
|------------------------|-------------------|-----------------------------------------------------------|--------------|------------------------|
| MF                     | GO:0045296        | cadherin binding                                          | 14           | 1.84x10 <sup>-5</sup>  |
| MF                     | GO:0000030        | mannosyltransferase activity                              | 5            | 2.14x10 <sup>-4</sup>  |
| MF                     | GO:0003746        | translation elongation factor activity                    | 5            | 3.28x10 <sup>-4</sup>  |
| MF                     | GO:0098973        | structural constituent of postsynaptic actin cytoskeleton | 3            | 5.64x10 <sup>-4</sup>  |
| MF                     | GO:0038132        | neuregulin binding                                        | 3            | 1.40x10 <sup>-3</sup>  |
| MF                     | GO:0044877        | protein-containing complex binding                        | 23           | 5.37x10 <sup>-3</sup>  |
| MF                     | GO:0140142        | nucleocytoplasmic carrier activity                        | 4            | 2.14x10 <sup>-2</sup>  |
| MF                     | GO:0097718        | disordered domain specific binding                        | 4            | 3.15x10 <sup>-2</sup>  |
| MF                     | GO:0043022        | ribosome binding                                          | 6            | 3.85x10 <sup>-2</sup>  |
| BP                     | GO:1901566        | organonitrogen compound biosynthetic process              | 35           | 2.42x10 <sup>-7</sup>  |
| BP                     | GO:0045901        | positive regulation of translational elongation           | 3            | 1.39x10 <sup>-3</sup>  |
| BP                     | GO:0045905        | positive regulation of translational termination          | 3            | 1.39x10 <sup>-3</sup>  |
| BP                     | GO:0097502        | mannosylation                                             | 5            | 3.26x10 <sup>-3</sup>  |
| BP                     | GO:1901137        | carbohydrate derivative biosynthetic process              | 16           | 3.29x10 <sup>-3</sup>  |
| BP                     | GO:0051128        | regulation of cellular component organization             | 33           | 7.61x10 <sup>-3</sup>  |
| BP                     | GO:0051131        | chaperone-mediated protein complex assembly               | 4            | 1.64x10 <sup>-2</sup>  |
| CC                     | GO:0070062        | extracellular exosome                                     | 44           | 4.67x10 <sup>-12</sup> |
| CC                     | GO:0005829        | cytosol                                                   | 70           | 1.54x10 <sup>-10</sup> |
| CC                     | GO:1904813        | ficolin-1-rich granule lumen                              | 9            | 1.42x10 <sup>-5</sup>  |
| CC                     | GO:0032991        | protein-containing complex                                | 74           | 1.79x10 <sup>-4</sup>  |
| CC                     | GO:0005925        | focal adhesion                                            | 12           | 2.24x10 <sup>-3</sup>  |
| CC                     | GO:0012505        | endomembrane system                                       | 48           | 1.08x10 <sup>-2</sup>  |
| CC                     | GO:0015629        | actin cytoskeleton                                        | 12           | 1.35x10 <sup>-2</sup>  |
| CC                     | GO:0030132        | clathrin coat of coated pit                               | 3            | 3.07x10 <sup>-2</sup>  |

MF, Molecular Function; BP, Biological Process; Cellular Component, CC
