# Supplementary material for: Gemcitabine Modulates HLA-I Regulation to Improve Tumor Antigen Presentation by Pancreatic Cancer Cells
Source: Int J Mol Sci. 2024 Mar 11;25(6):3211. doi: 10.3390/ijms25063211 (PMC10970070; doi:10.3390/ijms25063211)
Supplement: Supplementary file 1 [file ijms-25-03211-s001.zip]

Archive with 7 entries (7 files):
- Supplementary Figures S1-S9.pptx
- Table S1.pdf
- Table S2.pdf
- Table S3.xlsx
- Table S4.pdf
- Table S5.pdf
- Table S6.pdf
