# Supplementary material for: Gemcitabine Modulates HLA-I Regulation to Improve Tumor Antigen Presentation by Pancreatic Cancer Cells
Source: Int J Mol Sci. 2024 Mar 11;25(6):3211. doi: 10.3390/ijms25063211 (PMC10970070; doi:10.3390/ijms25063211)
Supplement: Supplementary file 1 [file ijms-25-03211-s001.zip › Table S3.xlsx]

## Sheet: Information
Gemcitabine modulates HLA-I regulation to improve tumor antigen presentation by pancreatic cancer cells
Alaina C. Larson 1, Shelby M. Knoche 1, Gabrielle L. Brumfield 1, Kenadie R. Doty 1, Benjamin D. Gephart 1, Promise R. Moore-Saufley 2, and Joyce C. Solheim 1*
1 Eppley Institute for Research in Cancer & Allied Diseases, Fred & Pamela Buffett Cancer Center, University of Nebraska Medical Center, Omaha, NE 68198, USA
2 University of Nebraska Omaha, Omaha, NE 68192, USA
* Correspondence: jsolheim@unmc.edu; Tel.: +1-402-559-4539

## Sheet: Gemcitabine-Exclusive Peptides 
Peptide	HLA-A*02:06 Immunogenicity Score	HLA-A*24:02 Immunogenicity Score	HLA-B*07:02 Immunogenicity Score	HLA-B*59:01 Immunogenicity Score	HLA-C*01:02 Immunogenicity Score	HLA-C*07:02 Immunogenicity Score	HLA-A*02:06 Binding Affinity (nM)	HLA-A*24:02 Binding Affinity (nM)	HLA-B*07:02 Binding Affinity (nM)	HLA-B*59:01 Binding Affinity (nM)	HLA-C*01:02 Binding Affinity (nM)	HLA-C*07:02 Binding Affinity (nM)	-10lgP	Mass	Length	ppm	m/z	RT	No Treatment Area	Gemcitabine Area	Fraction	Scan	Source File	Source Protein (Uniprot Accession)
RVFIGNLNTL	0.2054	0.2054	0.2054	0.2054	0.1674	0.2054	157.12	724.27	3312.05	18771	6882.3	5060.99	34.37	1145.66	10	-0.3	573.835	80.32	0	1161000	2	F2:23422	MSB60102A.raw	B2RXH8|P0DMR1|B7ZW38|O60812|P07910
RQINLELYA	0.10862	0.10862	0.10862	0.10862	0.06542	0.10862	50.42	25548.8	27000.6	19923.9	34097	16667.1	33.49	1118.61	9	-1.4	560.311	72	0	1943900	2	F2:20825	MSB60102A.raw	P02794|Q8N4E7
NVPEGLLATV	0.16461	0.16461	0.16461	0.16461	0.16821	0.16461	86.21	24066.8	6442.73	7161.08	4917.25	18942.2	29.75	1011.56	10	-2.1	506.786	98.54	0	646470	4	F4:27106	MSB66431A.raw	P05023|P50993|P13637|P54707|Q13733
FIADLVVGL	0.11772	0.11772	0.11772	0.11772	0.10502	0.11772	4.02	24901.5	10585	14175.5	3123.24	2343.3	14.55	945.553	9	1.3	473.785	111.31	0	462700	2	F2:34520	MSB60102A.raw	P06733|P09104|P13929
FVEWIPNNV	0.36531	0.36531	0.36531	0.36531	0.33281	0.36531	58.73	27957.5	22726.7	10399.4	12631.5	11558.8	24.94	1116.56	9	5.6	559.291	101.95	0	1174700	2	F2:30728	MSB60102A.raw	P07437|P68371|Q9BVA1|Q13885|Q13509|P04350|Q9BUF5|Q9H4B7
FQAEIAQLMSL	-0.08695	-0.08695	-0.08695	-0.08695	-0.09965	-0.08695	12.87	20290.7	20485.7	20952.6	14011.8	8179.19	37.01	1249.64	11	-0.5	625.826	111.69	0	1727500	2	F2:34638	MSB60102A.raw	P07900|P08238|Q14568|Q58FF8
FQAEIAQLM	0.17564	0.17564	0.17564	0.17564	0.16294	0.17564	7.2	7537.03	14735.6	10437.5	3742.95	276.02	25.77	1049.52	9	1.3	525.769	99.14	0	2222700	2	F2:29714	MSB60102A.raw	P07900|P08238|Q14568|Q58FF8
FQAEIAQLM	0.17564	0.17564	0.17564	0.17564	0.16294	0.17564	7.2	7537.03	14735.6	10437.5	3742.95	276.02	32.93	1049.52	9	-0.3	525.768	102.64	0	1629400	4	F4:28559	MSB66431A.raw	P07900|P08238|Q58FF8|Q14568
RVFIGNLNTL	0.2054	0.2054	0.2054	0.2054	0.1674	0.2054	157.12	724.27	3312.05	18771	6882.3	5060.99	39.35	1145.66	10	-0.1	573.835	85.06	0	1219700	4	F4:23286	MSB66431A.raw	P07910|O60812|B2RXH8|P0DMR1|B7ZW38
NQFPGFKEV	0.04654	0.04654	0.04654	0.04654	0.00854	0.04654	15.12	19829.3	24756.4	8566.31	12491.9	2397.05	38.93	1064.53	9	-1.5	533.271	65.27	0	3230500	2	F2:18830	MSB60102A.raw	P08579|P09012
LTIDDGIFEV	0.4027	0.4027	0.4027	0.4027	0.3595	0.4027	6.69	28144.8	30570.5	15296.5	22415.1	22730.4	21.1	1120.57	10	0.1	561.29	109.53	0	298780	2	F2:33760	MSB60102A.raw	P0DMV8|P0DMV9|P34931
EMFSDIYKI	-0.11071	-0.11071	-0.11071	-0.11071	-0.14871	-0.11071	184.53	5771.9	33254.6	4532.61	25049.8	13323.7	41.67	1144.55	9	-0.6	573.281	97.76	0	787420	2	F2:26939	MSB66429A.raw	P13693|Q9HAU6
ALPEDLVEV	0.20165	0.20165	0.20165	0.20165	0.20525	0.20165	5.08	19630.8	31360.5	29164.4	726.04	6437.5	31.38	983.518	9	-0.3	492.766	96.91	0	2626300	4	F4:26521	MSB66431A.raw	P13797|P13796
GVVDIFQTV	0.20044	0.20044	0.20044	0.20044	0.18704	0.20044	5.26	24505.9	21923.9	14001.8	16736.7	11560.4	30.44	976.523	9	-0.8	489.268	106.55	0	4586300	2	F2:32455	MSB60102A.raw	P23468|Q13332
LQLDPAQIYRV	0.08562	0.08562	0.08562	0.08562	0.08922	0.08562	56.99	24914.7	38703.1	21692.9	32071.2	29908	29.73	1314.73	11	-0.9	658.371	91.85	0	740370	4	F4:25158	MSB66431A.raw	P31941|Q9UH17
TVFSHAQTV	-0.13522	-0.13522	-0.13522	-0.13522	-0.17322	-0.13522	53.6	17398.1	10580.4	4851.25	3358.64	1992.4	22.91	988.498	9	-0.8	495.256	34.81	0	525150	2	F2:9590	MSB60102A.raw	P42677|Q71UM5
NVPEGLLATV	0.16461	0.16461	0.16461	0.16461	0.16821	0.16461	86.21	24066.8	6442.73	7161.08	4917.25	18942.2	34.1	1011.56	10	-0.3	506.787	94.64	0	1564200	2	F2:28137	MSB60102A.raw	P50993|P05023|Q13733|P13637|P54707
SQWSPALTI	-0.05522	-0.05522	-0.05522	-0.05522	-0.12712	-0.05522	24.84	2308.75	12623.5	4889.77	8024.91	5913.56	28.9	1001.52	9	0	501.766	99.09	0	2762500	4	F4:27351	MSB66431A.raw	P61077|P62837
FISPFGHGL	0.12814	0.12814	0.12814	0.12814	0.18184	0.12814	13.93	15173.4	3634.95	11130.2	570.24	1158.54	19.28	973.502	9	0.2	487.758	85.32	0	935090	2	F2:25015	MSB60102A.raw	Q15019|Q99719|O43236
LLFSAFSRA	-0.08955	-0.08955	-0.08955	-0.08955	-0.12755	-0.08955	41.33	30241.2	20889.9	11804.2	21570	17839.7	30.39	1010.55	9	0	506.285	83.22	0	1811600	2	F2:24283	MSB60102A.raw	Q5I7T1|Q5BKT4
NLLQVLEKV	-0.1319	-0.1319	-0.1319	-0.1319	-0.1283	-0.1319	30.31	27039.2	35197.5	12954.4	32457.6	23345.6	24.2	1054.64	9	-0.5	528.326	108.78	0	2383500	4	F4:30956	MSB66431A.raw	Q6KB66
FLADPSAFVAA	0.06912	0.06912	0.06912	0.06912	0.05642	0.06912	37.17	34506.7	20161.1	24799.5	13126.6	22004.7	24.87	1107.56	11	-7.2	554.783	97.86	0	3126500	2	F2:29296	MSB60102A.raw	Q8NHW5|P05388
FLLPVINEM	0.20376	0.20376	0.20376	0.20376	0.20736	0.20376	6.27	10589.5	12151	10986.2	2360.2	397.16	41.07	1074.58	9	-0.1	538.296	111.84	0	7685900	2	F2:34697	MSB60102A.raw	Q96HT8|Q9Y605
RQIDQFLVV	0.07768	0.07768	0.07768	0.07768	0.03448	0.07768	3.97	3857.16	15937.9	8362.81	11027.9	2082.8	33.15	1116.63	9	-0.8	559.321	88.6	0	1574400	4	F4:24270	MSB66431A.raw	Q9BTC8|O94776
RAADVLVYL	0.09746	0.09746	0.09746	0.09746	0.08476	0.09746	13.39	9984.93	2518.29	8052.3	1614.5	990.34	22.2	1018.58	9	-0.5	510.298	92.21		2200600	3	F3:25426	MSB66430A.raw	Q9BZ68|Q9BZ67
RAADVLVYL	0.09746	0.09746	0.09746	0.09746	0.08476	0.09746	13.39	9984.93	2518.29	8052.3	1614.5	990.34	22.2	1018.58	9	-0.5	510.298	92.21		226090	3	F3:25426	MSB66430A.raw	Q9BZ68|Q9BZ67
RAADVLVYL	0.09746	0.09746	0.09746	0.09746	0.08476	0.09746	13.39	9984.93	2518.29	8052.3	1614.5	990.34	22.07	1018.58	9	0.5	510.298	87.34		4267700	2	F2:25562	MSB60102A.raw	Q9BZ68|Q9BZ67
FQTEGKLYL	-0.06817	-0.06817	-0.06817	-0.06817	-0.08077	-0.06817	10.95	15606.5	16449.1	14124.7	2559.52	458.46	21.14	1097.58	9	-1.7	549.794	68.42		488240	2	F2:19773	MSB60102A.raw	Q9UK32|Q15349|Q15418|P51812
AAIEIFEKV	0.34225	0.34225	0.34225	0.34225	0.29905	0.34225	10.12	20061.7	25185.2	4561.69	14532	11971.3	28.6	1018.57	9	-3.6	510.29	84.7		164900	4	F4:23267	MSB66431A.raw	Q86UW6|N4BP2_HUMAN
AIIPYIPTL	0.16704	0.16704	0.16704	0.16704	0.12384	0.16704	6.05	7831.39	7070.54	14488.8	1064.78	1303.47	14.39	999.601	9	-0.9	500.807	110.9		1519500	2	F2:34344	MSB60102A.raw	P55060|XPO2_HUMAN
AIISELVSI	-0.09803	-0.09803	-0.09803	-0.09803	-0.14123	-0.09803	9.68	16528.6	14619.5	17077.1	11319.2	17431	25.37	943.559	9	-0.8	472.786	108.93		1646400	4	F4:30993	MSB66431A.raw	P78344|IF4G2_HUMAN
AIISELVSI	-0.09803	-0.09803	-0.09803	-0.09803	-0.14123	-0.09803	9.68	16528.6	14619.5	17077.1	11319.2	17431	26.25	943.559	9	0.8	472.787	108.31		6210300	2	F2:33237	MSB60102A.raw	P78344|IF4G2_HUMAN
AILELDEHL	0.21063	0.21063	0.21063	0.21063	0.21423	0.21063	130.09	30454.7	26878.4	27763.1	18401.2	26405.1	32.77	1051.55	9	-1.8	526.784	86.41		259530	3	F3:23866	MSB66430A.raw	P60510|PP4C_HUMAN
ALFPAPLAQI	0.00904	0.00904	0.00904	0.00904	-0.02896	0.00904	100.71	4827.16	19799.9	15862.7	3965.32	13140.1	22.88	1039.61	10	-1	520.81	109.58		1094100	2	F2:33719	MSB60102A.raw	Q8ND24|RN214_HUMAN
ALLDWVTSV	0.20938	0.20938	0.20938	0.20938	0.21298	0.20938	3.04	21462	21067.2	14636.4	9444.28	6144.06	29.89	1002.54	9	-0.9	502.276	111.69		922990	2	F2:34645	MSB60102A.raw	Q9UPN3|MACF1_HUMAN
ALLNILSEV	0.02793	0.02793	0.02793	0.02793	0.03153	0.02793	3.88	25781.5	23000.3	19622.5	15996.2	13159.9	18.34	970.57	9	-0.2	486.292	111.79		1377100	2	F2:34690	MSB60102A.raw	A0AVT1|UBA6_HUMAN
AQIDHYLGL	0.10398	0.10398	0.10398	0.10398	0.06078	0.10398	6.11	8969.61	18549.9	23475	6637.88	1616.79	14.38	1028.53	9	5.4	515.275	76.82		826660	2	F2:22309	MSB60102A.raw	Q9NQC3|RTN4_HUMAN
AQLELISRI	0.10225	0.10225	0.10225	0.10225	0.10585	0.10225	9.57	8536.61	29805.6	14783.8	26366.9	17045.2	26.71	1041.62	9	-0.4	521.816	83.68		673950	2	F2:24440	MSB60102A.raw	Q14004|CDK13_HUMAN
AQLELISRL	0.10225	0.10225	0.10225	0.10225	0.10585	0.10225	10.25	12233.6	23359.7	23862	17933	8070.62	26.71	1041.62	9	-0.4	521.816	83.68		673950	2	F2:24440	MSB60102A.raw	Q9NYV4|CDK12_HUMAN
AQLPSLLSV	-0.29232	-0.29232	-0.29232	-0.29232	-0.28872	-0.29232	3.2	13905.6	20682.1	12120.9	14654.2	8770.38	22.95	926.544	9	-2.1	464.278	103.84		3165900	2	F2:31393	MSB60102A.raw	Q2KHR3|QSER1_HUMAN
AQQVILVQV	0.09026	0.09026	0.09026	0.09026	0.12786	0.09026	23.62	22561.1	36078.6	21360.8	35737.4	26560.4	19.51	996.597	9	0.2	499.306	84.78		332350	4	F4:23308	MSB66431A.raw	Q53EP0|FND3B_HUMAN
ATIGVDFKV	0.11118	0.11118	0.11118	0.11118	0.06798	0.11118	14.04	19170.8	29520	13885.5	24811.4	22724	21.19	948.528	9	0.5	475.272	74.94		316160	2	F2:21686	MSB60102A.raw	Q9NP72|RAB18_HUMAN
ATINEVVQV	0.14021	0.14021	0.14021	0.14021	0.09701	0.14021	16.11	28487.6	29811.8	20413.3	14637.4	15525.3	13.3	971.529	9	-1.5	486.771	70.92		341630	1	F1:20638	MSB60101A.raw	O75362|ZN217_HUMAN
ATLKELTSL	-0.19744	-0.19744	-0.19744	-0.19744	-0.19384	-0.19744	92.46	16954.5	7651.4	29296	7415.45	18730.8	24.46	974.565	9	-1.8	488.289	73.53		2514900	2	F2:21271	MSB60102A.raw	O00422|SAP18_HUMAN
ATYVFLHTV	0.19388	0.19388	0.19388	0.19388	0.19508	0.19388	6.26	12887.3	24675.9	7934.34	9485.45	12331.5	18.63	1049.55	9	-1.7	525.784	79.25		521720	4	F4:21758	MSB66431A.raw	Q53FV1|ORML2_HUMAN
AVFPDDMPTL	-0.08194	-0.08194	-0.08194	-0.08194	-0.11994	-0.08194	84.16	10194.4	16106.7	22580.4	2301.82	9350.54	14.87	1104.52	10	-0.5	553.265	106.69		2216300	4	F4:30095	MSB66431A.raw	Q03164|KMT2A_HUMAN
AVFPDDMPTL	-0.08194	-0.08194	-0.08194	-0.08194	-0.11994	-0.08194	84.16	10194.4	16106.7	22580.4	2301.82	9350.54	25.14	1104.52	10	-2.6	553.264	106.24		4626000	2	F2:32356	MSB60102A.raw	Q03164|KMT2A_HUMAN
AVFQEAAEV	0.14729	0.14729	0.14729	0.14729	0.10929	0.14729	40.76	33966.2	19340.4	16477	11672.7	15144.7	19.43	962.471	9	-0.4	482.243	65.22		1153000	4	F4:17857	MSB66431A.raw	O00212|RHOD_HUMAN
AVFQEAAEV	0.14729	0.14729	0.14729	0.14729	0.10929	0.14729	40.76	33966.2	19340.4	16477	11672.7	15144.7	18.45	962.471	9	-0.5	482.243	64.35		3008700	2	F2:18614	MSB60102A.raw	O00212|RHOD_HUMAN
AVWKESFQV	-0.17221	-0.17221	-0.17221	-0.17221	-0.24411	-0.17221	9.46	17909.2	19267.1	9905.94	25070.7	21978.1	25.15	1092.56	9	2.3	547.289	75.14		145560	4	F4:20691	MSB66431A.raw	Q8NB91|FANCB_HUMAN
DLIHEIYTV	0.31809	0.31809	0.31809	0.31809	0.27489	0.31809	135.32	20912.8	33149	12087.4	29254.5	19227.8	34.22	1101.57	9	-0.4	551.792	103.46		15237000	2	F2:31174	MSB60102A.raw	P18124|RL7_HUMAN
EIVEKILSV	-0.07659	-0.07659	-0.07659	-0.07659	-0.08999	-0.07659	81.34	32657	19648	14140.3	20127.8	14610.2	17.18	1028.61	9	2.8	515.315	87.68		73039	2	F2:24268	MSB66429A.raw	Q14651|PLSI_HUMAN
EVISKLYAV	-0.32397	-0.32397	-0.32397	-0.32397	-0.36717	-0.32397	14.41	18875.5	11552.4	10066.5	19228.6	10161.5	30.76	1020.59	9	-2.4	511.299	72.82		492530	1	F1:20192	MSB66428A.raw	P50990|TCPQ_HUMAN
EVISKLYAV	-0.32397	-0.32397	-0.32397	-0.32397	-0.36717	-0.32397	14.41	18875.5	11552.4	10066.5	19228.6	10161.5	30.76	1020.59	9	-2.4	511.299	72.82		37218	1	F1:20192	MSB66428A.raw	P50990|TCPQ_HUMAN
EVISKLYAV	-0.32397	-0.32397	-0.32397	-0.32397	-0.36717	-0.32397	14.41	18875.5	11552.4	10066.5	19228.6	10161.5	30.09	1020.59	9	0.4	511.3	67.27		797170	2	F2:19446	MSB60102A.raw	P50990|TCPQ_HUMAN
EVVERLLSV	0.04809	0.04809	0.04809	0.04809	0.03469	0.04809	48.06	29549.7	12690.2	11434.8	17482.8	11668.8	31.6	1042.6	9	-0.1	522.308	81.41		761450	4	F4:22344	MSB66431A.raw	Q27J81|INF2_HUMAN
FAIPGSIFL	0.09003	0.09003	0.09003	0.09003	0.04683	0.09003	11.35	14842.8	7041.68	4061.9	268.25	428.72	19.18	963.543	9	0.7	482.779	113.03		2980100	2	F2:35147	MSB60102A.raw	Q5BJD5|TM41B_HUMAN
FALVGSYTL	-0.06523	-0.06523	-0.06523	-0.06523	-0.06163	-0.06523	29.7	5234.98	4035.79	2979.26	1186.62	1806.85	22.7	969.517	9	-0.4	485.766	105.36		1055800	2	F2:32008	MSB60102A.raw	Q9NQW6|ANLN_HUMAN
FAMEIDPSL	0.08821	0.08821	0.08821	0.08821	0.14521	0.08821	6.57	14415.3	2014.71	2032.82	368.18	547.11	19.22	1021.48	9	-1.5	511.746	104.52		558960	4	F4:29272	MSB66431A.raw	O43681|GET3_HUMAN
FCMYHYFVDI	0.12518	0.12518	0.12518	0.12518	0.18218	0.12518	367.15	19235.9	28493.8	8248.15	18136.9	19173.1	17.02	1336.56	10	-2.3	669.287	84.4		9404600	4	F4:23222	MSB66431A.raw	Q8WWY8|LIPH_HUMAN
FGTNVMVTV	-0.06149	-0.06149	-0.06149	-0.06149	-0.07409	-0.06149	55.7	23191.2	23218.6	3841	13195.6	7364.52	21.88	966.484	9	-0.8	484.249	85.39		943440	4	F4:23419	MSB66431A.raw	Q8TCT9|HM13_HUMAN
FIFSDTHEL	0.01547	0.01547	0.01547	0.01547	-0.02253	0.01547	4.17	8807.47	5151.21	6308.08	459.19	245.39	24.03	1107.52	9	-1	554.769	83.85		554370	4	F4:23033	MSB66431A.raw	Q9UKK3|PARP4_HUMAN
FIPPDGNFRL	0.16279	0.16279	0.16279	0.16279	0.16639	0.16279	217.4	12152.9	7470.86	12681	277.79	7191.13	18.24	1174.61	10	-1.5	588.313	87.09		906800	4	F4:23853	MSB66431A.raw	P53677|AP3M2_HUMAN
FLKDLVASV	-0.08326	-0.08326	-0.08326	-0.08326	-0.01326	-0.08326	9.15	26487	11481.9	8772.66	5165.1	1630.62	17.73	990.575	9	1.3	496.295	81.6		319730	2	F2:23778	MSB60102A.raw	Q14919|NC2A_HUMAN
FLKQILNGV	-0.05306	-0.05306	-0.05306	-0.05306	0.01694	-0.05306	15.88	31421	21387.1	14134.8	21651.2	12666.2	17.06	1030.62	9	1.3	516.317	85.8		289400	4	F4:23555	MSB66431A.raw	P53355|DAPK1_HUMAN
FLLHIQQQV	-0.11593	-0.11593	-0.11593	-0.11593	-0.11233	-0.11593	7.33	20214	26239.4	6875.6	11583.3	5005.77	18.6	1124.63	9	0.4	563.325	76.12		192790	2	F2:22092	MSB60102A.raw	O95486|SC24A_HUMAN
FLQEGDLISA	0.12297	0.12297	0.12297	0.12297	0.16057	0.12297	23.18	36216.2	24746	22359.4	26941.6	25069.1	38.42	1091.55	10	-0.4	546.782	89.29		4815900	4	F4:24421	MSB66431A.raw	Q13868|EXOS2_HUMAN
FLQEGDLISA	0.12297	0.12297	0.12297	0.12297	0.16057	0.12297	23.18	36216.2	24746	22359.4	26941.6	25069.1	38.42	1091.55	10	-0.4	546.782	89.29		875800	4	F4:24421	MSB66431A.raw	Q13868|EXOS2_HUMAN
FLQEGDLISA	0.12297	0.12297	0.12297	0.12297	0.16057	0.12297	23.18	36216.2	24746	22359.4	26941.6	25069.1	27.06	1091.55	10	0.5	546.783	86.62		6248900	2	F2:25395	MSB60102A.raw	Q13868|EXOS2_HUMAN
FLSELTQQL	-0.09265	-0.09265	-0.09265	-0.09265	-0.03895	-0.09265	7.21	9708.48	7215.76	10589.1	507.22	288.4	20.85	1077.57	9	4.4	539.795	97.81		1504500	2	F2:29241	MSB60102A.raw	P14174|MIF_HUMAN
FQEEDFPAL	0.27855	0.27855	0.27855	0.27855	0.24605	0.27855	8.82	16549.9	14597.7	17264.2	4534.62	1876.59	33.04	1094.49	9	-1	548.253	98.28		6646700	4	F4:27100	MSB66431A.raw	Q86UK7|ZN598_HUMAN
FQMPTPIQM	0.00384	0.00384	0.00384	0.00384	0.06084	0.00384	9.1	6765.94	7591.7	9203.88	2466.54	98.28	29.13	1091.51	9	-0.8	546.764	102.38		1847100	2	F2:30989	MSB60102A.raw	Q9Y2R4|DDX52_HUMAN
FQNPFRSEL	0.06834	0.06834	0.06834	0.06834	0.07044	0.06834	46.18	12203.9	2392.83	13772.8	865.57	131.28	22	1136.56	9	-2.4	569.287	84.44		513490	4	F4:23127	MSB66431A.raw	P18887|XRCC1_HUMAN
FSIPDSLLI	-0.11793	-0.11793	-0.11793	-0.11793	-0.16113	-0.11793	53.54	5190.15	21609.3	2698.79	2688.1	3314.02	13.13	1003.56	9	0.5	502.787	106.95		31420000	2	F2:32725	MSB60102A.raw	P54819|KAD2_HUMAN
FSWEGAFQHV	0.27509	0.27509	0.27509	0.27509	0.20319	0.27509	9.23	8864.73	25187.3	5237.02	12402.6	13144.7	52.77	1206.55	10	-1.1	604.279	100.11		5408100	4	F4:27592	MSB66431A.raw	P26641|EF1G_HUMAN
FSWEGAFQHV	0.27509	0.27509	0.27509	0.27509	0.20319	0.27509	9.23	8864.73	25187.3	5237.02	12402.6	13144.7	47.62	1206.55	10	0.2	604.28	94.49		15337000	2	F2:28066	MSB60102A.raw	P26641|EF1G_HUMAN
FVADGIFKA	0.1661	0.1661	0.1661	0.1661	0.1534	0.1661	3.64	31759.7	20352.2	11600.1	20468.6	7479.02	37.54	966.517	9	-1.2	484.265	75.42		296100	4	F4:20793	MSB66431A.raw	P23396|RS3_HUMAN
FVADGIFKA	0.1661	0.1661	0.1661	0.1661	0.1534	0.1661	3.64	31759.7	20352.2	11600.1	20468.6	7479.02	37.54	966.517	9	-1.2	484.265	75.42		106660	4	F4:20793	MSB66431A.raw	P23396|RS3_HUMAN
FVDPAQITM	0.0601	0.0601	0.0601	0.0601	0.0529	0.0601	36.29	21021.7	5921.18	12687.4	1262.81	1032	43.41	1020.5	9	-0.3	511.255	90.58		1758200	4	F4:24792	MSB66431A.raw	P23921|RIR1_HUMAN
FVDPAQITM	0.0601	0.0601	0.0601	0.0601	0.0529	0.0601	36.29	21021.7	5921.18	12687.4	1262.81	1032	31.37	1020.5	9	0	511.255	88.47		1932300	2	F2:26026	MSB60102A.raw	P23921|RIR1_HUMAN
FVDPNGKISL	-0.1646	-0.1646	-0.1646	-0.1646	-0.1718	-0.1646	233.74	26593.2	5384.75	23256.1	262.15	5731.01	25.27	1088.59	10	2.8	545.302	73.8		172600	1	F1:20467	MSB66428A.raw	Q92538|GBF1_HUMAN
FVDPNGKISL	-0.1646	-0.1646	-0.1646	-0.1646	-0.1718	-0.1646	233.74	26593.2	5384.75	23256.1	262.15	5731.01	30.51	1088.59	10	0	545.301	67.52		1487300	2	F2:19539	MSB60102A.raw	Q92538|GBF1_HUMAN
FVDRGFYSV	0.1027	0.1027	0.1027	0.1027	0.0955	0.1027	2.8	12581.7	8168.22	7662.83	3573.38	3960.05	15.8	1088.53	9	0.9	545.272	67.77		156300	4	F4:18659	MSB66431A.raw	P60510|PP4C_HUMAN
FVDRGFYSV	0.1027	0.1027	0.1027	0.1027	0.0955	0.1027	2.8	12581.7	8168.22	7662.83	3573.38	3960.05	18.55	1088.53	9	1.2	545.273	67.42		529420	2	F2:19539	MSB60102A.raw	P60510|PP4C_HUMAN
FVPEIFHRI	0.39449	0.39449	0.39449	0.39449	0.39809	0.39449	5.25	901.59	22271.8	7608.31	215.06	1112.55	24.93	1156.64	9	-2.5	386.553	77.18		1239300	2	F2:22418	MSB60102A.raw	Q13472|TOP3A_HUMAN
GGLDRYFQV	0.09676	0.09676	0.09676	0.09676	0.10036	0.09676	437.7	19709.7	33767.6	16665.1	29967.3	19857	23.27	1053.52	9	-1.3	527.769	83.6		494420	4	F4:23004	MSB66431A.raw	Q6PI48|SYDM_HUMAN
GLSDGEWQL	0.21513	0.21513	0.21513	0.21513	0.26883	0.21513	52.5	25088.6	30463.9	30647	20381.6	14237.5	26.25	1003.46	9	-2.8	502.736	92.18		220990	2	F2:27301	MSB60102A.raw	P02144|MYG_HUMAN
GQISEVVVV	0.07205	0.07205	0.07205	0.07205	0.02885	0.07205	15.96	25350.6	33957.4	22516	27723.2	15498.6	35.3	928.523	9	-0.2	465.269	75.43		4394000	4	F4:20731	MSB66431A.raw	Q14011|CIRBP_HUMAN
GQISEVVVV	0.07205	0.07205	0.07205	0.07205	0.02885	0.07205	15.96	25350.6	33957.4	22516	27723.2	15498.6	32.42	928.523	9	-0.3	465.269	74.01		20772000	2	F2:21454	MSB60102A.raw	Q14011|CIRBP_HUMAN
GQLDFSEFLNL	0.16618	0.16618	0.16618	0.16618	0.16978	0.16618	112.75	21532.7	36946.1	31498.9	34919.5	24187.4	32.34	1281.62	11	-0.2	641.819	114.34		1097000	2	F2:35700	MSB60102A.raw	P31949|S10AB_HUMAN
GQVDMDIKL	-0.12808	-0.12808	-0.12808	-0.12808	-0.14148	-0.12808	82.89	31323.9	34100.3	28993.6	30970.7	19472.3	32.8	1017.52	9	2.4	509.767	73.82		209360	4	F4:20278	MSB66431A.raw	O43896|KIF1C_HUMAN
GQVDMDIKL	-0.12808	-0.12808	-0.12808	-0.12808	-0.14148	-0.12808	82.89	31323.9	34100.3	28993.6	30970.7	19472.3	20.91	1017.52	9	7.2	509.769	72.3		128000	2	F2:20929	MSB60102A.raw	O43896|KIF1C_HUMAN
GQWASVIRV	0.13159	0.13159	0.13159	0.13159	0.05969	0.13159	6.74	20619.8	33447.3	14955.1	33820.7	17514.4	39.53	1014.56	9	-4	508.286	79.4		402600	4	F4:21836	MSB66431A.raw	Q15393|SF3B3_HUMAN
GQWASVIRV	0.13159	0.13159	0.13159	0.13159	0.05969	0.13159	6.74	20619.8	33447.3	14955.1	33820.7	17514.4	31.71	1014.56	9	-0.7	508.287	75.91		1761400	2	F2:22060	MSB60102A.raw	Q15393|SF3B3_HUMAN
GQWGRAWEV	0.43867	0.43867	0.43867	0.43867	0.36677	0.43867	2.68	6962.36	25500.2	7761.21	24401.6	5164.77	39.61	1087.52	9	-1.6	544.766	74.56		297040	4	F4:20534	MSB66431A.raw	Q9UBM7|DHCR7_HUMAN
GSYTGFIKV	0.16738	0.16738	0.16738	0.16738	0.16858	0.16738	62.48	23595.7	29846.3	13449.7	19364.9	16146.3	29.44	970.512	9	1	486.264	71.16		331570	2	F2:20588	MSB60102A.raw	Q9NS23|RASF1_HUMAN
GVIDLIFEKA	0.25302	0.25302	0.25302	0.25302	0.20982	0.25302	33.7	39669.7	34605.4	28584.6	43783.8	37243.5	33.88	1103.62	10	1.6	552.819	107.48		1675100	4	F4:30490	MSB66431A.raw	Q04637|IF4G1_HUMAN
GVIDLIFEKA	0.25302	0.25302	0.25302	0.25302	0.20982	0.25302	33.7	39669.7	34605.4	28584.6	43783.8	37243.5	38.78	1103.62	10	1	552.819	106.42		4556400	2	F2:32440	MSB60102A.raw	Q04637|IF4G1_HUMAN
GVIEKLLTS	-0.06317	-0.06317	-0.06317	-0.06317	-0.10637	-0.06317	271.83	39775.4	29044.1	35778.1	36237	27907.1	23.31	958.57	9	-0.6	480.292	85.81		67319	2	F2:23772	MSB66429A.raw	O75534|CSDE1_HUMAN
GVIEKLLTS	-0.06317	-0.06317	-0.06317	-0.06317	-0.10637	-0.06317	271.83	39775.4	29044.1	35778.1	36237	27907.1	28.34	958.57	9	-1.6	480.291	79.52		1007900	2	F2:23193	MSB60102A.raw	O75534|CSDE1_HUMAN
GVLENIFGV	0.33473	0.33473	0.33473	0.33473	0.33833	0.33473	2.39	22969	29407.8	15796.9	27170.8	19622.2	34.97	946.512	9	0.4	474.264	111.39		2954300	2	F2:34518	MSB60102A.raw	Q9H6A9|PCX3_HUMAN
GVVEKLSVL	-0.22179	-0.22179	-0.22179	-0.22179	-0.23519	-0.22179	309.39	31286.3	5269.25	31757.6	6844.57	10171.8	20.78	942.575	9	-0.2	472.295	73.88		31040	4	F4:20364	MSB66431A.raw	Q7L5Y9|MAEA_HUMAN
HIIENIVAV	0.32063	0.32063	0.32063	0.32063	0.27743	0.32063	4.29	25000.3	9774.14	9063.75	5185.26	3544.04	37.14	1006.58	9	-0.2	504.298	72.37		5351200	4	F4:19937	MSB66431A.raw	O76021|RL1D1_HUMAN
HLPEELAEL	0.27573	0.27573	0.27573	0.27573	0.27933	0.27573	31.86	12006.5	17801.2	30292.6	58.79	1811.98	29.53	1049.54	9	1.3	525.778	81.88		63688	4	F4:22511	MSB66431A.raw	Q96II8|LRCH3_HUMAN
HQLENLSNFI	-0.01274	-0.01274	-0.01274	-0.01274	-0.00914	-0.01274	43.56	14358	26955	11310.6	26695.9	21608.3	34.91	1213.61	10	0.5	607.812	90.68		859310	4	F4:24887	MSB66431A.raw	Q99439|CNN2_HUMAN
HVLDTLIQL	0.09072	0.09072	0.09072	0.09072	0.09432	0.09072	21.32	22607.5	10997.9	14313.6	10901.4	4933.08	27.71	1050.61	9	-3.5	526.309	100.28		437760	4	F4:27637	MSB66431A.raw	Q7Z6Z7|HUWE1_HUMAN
IITKDLFQV	-0.16212	-0.16212	-0.16212	-0.16212	-0.17472	-0.16212	10.28	19945	30521.3	11870.9	26226	21133.2	34.46	1075.63	9	0.1	538.821	87.08		2370400	4	F4:23821	MSB66431A.raw	Q14204|DYHC1_HUMAN
IITKDLFQV	-0.16212	-0.16212	-0.16212	-0.16212	-0.17472	-0.16212	10.28	19945	30521.3	11870.9	26226	21133.2	29.46	1075.63	9	-0.4	538.821	82.49		6272900	2	F2:24092	MSB60102A.raw	Q14204|DYHC1_HUMAN
ILGYTEHQV	0.09895	0.09895	0.09895	0.09895	0.08795	0.09895	419.36	24699.1	34125	20341	22246.5	26579.1	14	1058.54	9	8.5	530.282	33.95		393220	2	F2:9398	MSB60102A.raw	P04406|G3P_HUMAN
ILIDWLVQV	0.23794	0.23794	0.23794	0.23794	0.19474	0.23794	2.56	17066.2	32398	9509.08	11241.1	4816.62	23.41	1097.65	9	1.6	549.832	115.55		7305000	2	F2:36232	MSB60102A.raw	P14635|CCNB1_HUMAN
ILPERFLAV	0.27125	0.27125	0.27125	0.27125	0.27485	0.27125	6.01	3391.95	14479.5	14127.8	35.69	609.77	22.64	1056.63	9	1	529.324	86.93		619580	2	F2:25513	MSB60102A.raw	Q8NBQ5|DHB11_HUMAN
ILVDWLVQV	0.20814	0.20814	0.20814	0.20814	0.19474	0.20814	3.33	22570.7	33378.2	12377.9	14901.8	7602.3	14.06	1083.63	9	1.8	542.825	113.88		3339500	2	F2:35598	MSB60102A.raw	O95067|CCNB2_HUMAN
IQDPVIFYV	0.25816	0.25816	0.25816	0.25816	0.25096	0.25816	2.81	8214.93	30797.6	6935.9	10364.1	2626.88	16.91	1092.59	9	-3	547.298	109.47		346900	4	F4:31195	MSB66431A.raw	Q86SQ4|AGRG6_HUMAN
IVDPFQILV	0.10684	0.10684	0.10684	0.10684	0.09964	0.10684	13.71	18270.9	26993.3	6562.19	7285.5	8009.04	26.78	1042.61	9	0.9	522.311	114.35		2760400	1	F1:36127	MSB60101A.raw	Q9Y3C4|TPRKB_HUMAN
IVLKGVVQV	-0.18158	-0.18158	-0.18158	-0.18158	-0.17798	-0.18158	16.85	22640.8	22959.6	10510.5	17257.1	16567.3	25.86	953.627	9	0.4	477.821	68.83		482270	4	F4:18909	MSB66431A.raw	Q13823|NOG2_HUMAN
KIGTVMTFL	0.02612	0.02612	0.02612	0.02612	0.01512	0.02612	229.55	17561.8	12928.9	31490.4	16331.3	18519	25.92	1008.57	9	2.5	505.292	90.17		321310	2	F2:26589	MSB60102A.raw	P30046|DOPD_HUMAN
KIIGIMEEV	0.1846	0.1846	0.1846	0.1846	0.1414	0.1846	3.35	19743.8	19775.1	14891	16255.3	12788.8	37.88	1030.57	9	-0.1	516.294	80.73		42765	4	F4:22210	MSB66431A.raw	P52701|MSH6_HUMAN
KILDYEVTL	0.16689	0.16689	0.16689	0.16689	0.17049	0.16689	27.13	17305.9	15633.8	20067.8	5881.28	8026.91	36.85	1092.61	9	-0.1	547.311	87.28		783430	4	F4:23908	MSB66431A.raw	P40189|IL6RB_HUMAN
KIVDFSYSV	-0.10579	-0.10579	-0.10579	-0.10579	-0.11919	-0.10579	2.54	12257.5	11235.1	8371.87	6754.16	5542.16	37.5	1056.55	9	-0.4	529.282	75.38		108300	4	F4:20771	MSB66431A.raw	O60566|BUB1B_HUMAN
KIVPVEITI	0.27169	0.27169	0.27169	0.27169	0.25829	0.27169	187.66	13639.5	20742.9	10599.6	16561.8	22165.5	17.8	1010.64	9	0.3	506.326	82.98		416600	2	F2:24283	MSB60102A.raw	P30085|KCY_HUMAN
KLDEAFEFV	0.40915	0.40915	0.40915	0.40915	0.40195	0.40915	4.29	13941.8	30881	21017.3	9782.29	11032	27.16	1096.54	9	-0.8	549.279	92.12		1232800	4	F4:25265	MSB66431A.raw	P28562|DUS1_HUMAN
KLLEPVLLL	0.10937	0.10937	0.10937	0.10937	0.11297	0.10937	12.24	4364.55	15927.2	17731.4	5167.34	3611.32	17.41	1036.69	9	0.1	519.352	106.28		14490000	2	F2:32365	MSB60102A.raw	P62249|RS16_HUMAN
KLVGEFLEV	0.30434	0.30434	0.30434	0.30434	0.29094	0.30434	3.85	14041.1	24379.5	16983.5	11962.4	8769.91	22.17	1032.59	9	-0.6	517.3	84.87		1351700	2	F2:24948	MSB60102A.raw	Q15046|SYK_HUMAN
KMGLIFEV	0.32414	0.32414	0.32414	0.32414	0.31314	0.32414	60.01	19180	35008.4	21188.8	35739	27526.8	19	935.515	8	-0.8	468.764	99.98		82472	2	F2:27611	MSB66429A.raw	Q15363|TMED2_HUMAN
KMIEDLQNEL	0.09875	0.09875	0.09875	0.09875	0.05555	0.09875	21.19	15146.8	20042	28067	10500.3	13835.7	23.16	1231.61	10	-2.9	616.811	74.29		39232	4	F4:20463	MSB66431A.raw	Q8IY18|SMC5_HUMAN
KQDETQTKI	-0.05653	-0.05653	-0.05653	-0.05653	-0.06373	-0.05653	327.98	21788.9	31117.2	24495	20080.2	21667.6	34.16	1089.57	9	-0.6	545.79	12.23		103770	2	F2:2876	MSB60102A.raw	P35221|CTNA1_HUMAN
KQFDKILEL	0.02474	0.02474	0.02474	0.02474	-0.01326	0.02474	4.99	4581.08	17454.1	15766.9	3310.4	304.87	16.91	1132.65	9	-0.1	567.332	73.83		79960	4	F4:20349	MSB66431A.raw	P47895|AL1A3_HUMAN
KVPEWVDTV	0.39311	0.39311	0.39311	0.39311	0.39671	0.39311	7.48	4108.13	24801.4	14656.5	573.03	5844.92	38.15	1071.56	9	0.1	536.787	71.95		14426000	2	F2:20848	MSB60102A.raw	P39019|RS19_HUMAN
KVVDVDVKL	0.00564	0.00564	0.00564	0.00564	-0.00776	0.00564	105.32	25121.7	18955.1	22880.7	13250.8	14390.7	25.23	1013.61	9	0.7	507.814	54.03		162120	2	F2:15393	MSB60102A.raw	O15066|KIF3B_HUMAN
LAAARLAAA	0.14791	0.14791	0.14791	0.14791	0.13521	0.14791	201.45	36332.8	1312.57	10018.4	10014.8	10776.5	30.95	826.502	9	0	414.259	31.61		4050700	2	F2:8641	MSB60102A.raw	P30101|PDIA3_HUMAN
LILEGNDIEL	0.31555	0.31555	0.31555	0.31555	0.31915	0.31555	277.06	33117.4	20366.3	26005.1	15933.5	27084.8	33.52	1127.61	10	1.4	564.812	105.88		1759100	2	F2:32188	MSB60102A.raw	P32969|RL9_HUMAN
LIPKFLTEV	-0.02578	-0.02578	-0.02578	-0.02578	-0.02218	-0.02578	6.83	12788.5	21420	13903.5	275.67	5614.28	33.24	1058.64	9	-1.5	530.325	101.19		478870	2	F2:27946	MSB66429A.raw	Q9ULK4|MED23_HUMAN
LLSTLGPATV	0.05282	0.05282	0.05282	0.05282	0.10652	0.05282	272.9	30410.2	21337.4	14458.9	19714.4	27859.7	16.99	970.57	10	-3	486.291	106.27		4023900	2	F2:32560	MSB60102A.raw	Q96LA6|FCRL1_HUMAN
LQIEDFEARI	0.43706	0.43706	0.43706	0.43706	0.39386	0.43706	32.6	17386.8	30825	13611.6	30940.2	26822.4	20.34	1232.64	10	0	617.327	93.04		1671900	2	F2:27658	MSB60102A.raw	Q9P0J0|NDUAD_HUMAN
LSQLYVMSLL	-0.32356	-0.32356	-0.32356	-0.32356	-0.28596	-0.32356	173.23	14324.2	15816.6	15384.8	15521.4	20111	15.47	1165.64	10	-9.7	583.822	72.64		332190	2	F2:20107	MSB66429A.raw	P23945|FSHR_HUMAN
LVIGQFLEA	0.12384	0.12384	0.12384	0.12384	0.08064	0.12384	17.45	32947.3	13873.6	11570.8	23784.4	13087.8	28.17	988.559	9	-2.1	495.286	107.42		1524000	2	F2:32845	MSB60102A.raw	P43686|PRS6B_HUMAN
MIIKLITSV	-0.12322	-0.12322	-0.12322	-0.12322	-0.16642	-0.12322	4.57	21084.5	6467.24	4015.45	11143.5	11792.1	32.56	1016.63	9	0.8	509.323	99.9		111130	2	F2:27593	MSB66429A.raw	P06737|PYGL_HUMAN
NAVVELVTV	0.19952	0.19952	0.19952	0.19952	0.18612	0.19952	193.14	32816	23500.2	5199.08	18162.8	15278.6	30.32	942.539	9	-1.7	472.276	92.77		2101000	4	F4:25447	MSB66431A.raw	O75787|RENR_HUMAN
NIANHFFTV	0.26937	0.26937	0.26937	0.26937	0.25667	0.26937	4.16	8202.05	10812.8	4559.07	5772.52	2434.43	33.73	1061.53	9	-0.4	531.772	80.25		6185500	2	F2:23327	MSB60102A.raw	Q16222|UAP1_HUMAN
NIVEKLREV	-0.00411	-0.00411	-0.00411	-0.00411	-0.01751	-0.00411	52.37	32768.1	17705.5	17849	12314.5	7489.79	26.81	1098.64	9	-1	550.327	58.92		704030	2	F2:16863	MSB60102A.raw	Q9C035|TRIM5_HUMAN
NLLDLLTEV	0.08874	0.08874	0.08874	0.08874	0.09234	0.08874	4.05	26425.2	26644.8	11496.7	14301.9	7036.81	28.35	1028.58	9	0.5	515.295	116.42		728440	2	F2:36551	MSB60102A.raw	Q9H3U1|UN45A_HUMAN
NLLTHIENV	0.27296	0.27296	0.27296	0.27296	0.27656	0.27296	18.11	25462.4	32617.1	14200.1	19358.7	11056.5	24.4	1051.57	9	-0.3	526.79	80.21		367570	4	F4:22018	MSB66431A.raw	A8MW92|P20L1_HUMAN
NQDDSILKV	-0.14166	-0.14166	-0.14166	-0.14166	-0.14886	-0.14166	98.57	29207.3	34085.2	18302.7	24699.7	11658.9	23.55	1030.53	9	0.6	516.272	52.85		733020	2	F2:15002	MSB60102A.raw	P30530|UFO_HUMAN
NQITQLESL	-0.05314	-0.05314	-0.05314	-0.05314	-0.09634	-0.05314	71.49	16329.6	18334	21573.1	15627.4	6009.74	35.71	1044.55	9	0.3	523.28	89.03		2835400	4	F4:24378	MSB66431A.raw	Q53EZ4|CEP55_HUMAN
NQVGIVLNV	0.20282	0.20282	0.20282	0.20282	0.18942	0.20282	10.42	21860	30741.7	10266.4	28833.4	9727.09	37.29	954.55	9	0.5	478.282	85.68		2714000	2	F2:25070	MSB60102A.raw	Q7Z3K3|POGZ_HUMAN
NQWDGTQHGV	0.10308	0.10308	0.10308	0.10308	0.03118	0.10308	45.14	23064.6	28588.9	16157.8	32988.3	22611.2	12.82	1140.49	10	0.5	571.255	30.13		113500	2	F2:8166	MSB60102A.raw	P46939|UTRO_HUMAN
NVFFGSIWL	0.27481	0.27481	0.27481	0.27481	0.23681	0.27481	151.29	20693.5	17708	13759.1	10646.8	10042.1	30	1081.56	9	0.2	541.787	115.81		2375300	2	F2:36268	MSB60102A.raw	P55061|BI1_HUMAN
QIYDIFQKL	0.03716	0.03716	0.03716	0.03716	0.03836	0.03716	118.22	13618	18517.6	13384.5	7949.03	4455.59	21.77	1166.63	9	1.8	584.325	103.69		2813900	2	F2:31332	MSB60102A.raw	P60842|IF4A1_HUMAN
QQVQRLPFL	-0.00416	-0.00416	-0.00416	-0.00416	-0.01756	-0.00416	31.25	11037.5	19100.2	23638.4	14509.2	5755.19	30.77	1127.65	9	-0.9	564.829	82.45		145680	2	F2:24085	MSB60102A.raw	Q9Y244|POMP_HUMAN
QSLEYLEQV	0.09993	0.09993	0.09993	0.09993	0.10353	0.09993	24.99	22848.5	33995.3	10760	22414.7	20572.3	26.12	1107.54	9	-1.1	554.779	84.7		682820	4	F4:23227	MSB66431A.raw	Q9BZE4|NOG1_HUMAN
QTPEFFQDV	0.23655	0.23655	0.23655	0.23655	0.24015	0.23655	119.75	9467.51	33802	21217.7	1016.62	8931.84	27.12	1109.5	9	-1.5	555.758	95.52		1816400	4	F4:26179	MSB66431A.raw	P49327|FAS_HUMAN
QVIPQFQTV	-0.04564	-0.04564	-0.04564	-0.04564	-0.08884	-0.04564	16.68	12730.5	15067.7	7329.22	8794.52	7772.47	18.49	1058.58	9	0.4	530.295	84.55		341360	4	F4:23178	MSB66431A.raw	P08047|SP1_HUMAN
QVIPVLPQV	-0.01524	-0.01524	-0.01524	-0.01524	-0.05844	-0.01524	5.13	20495	22770.6	7629.66	17756.2	12533.3	15.38	991.607	9	-2.5	496.809	98.72		426170	2	F2:29685	MSB60102A.raw	Q96SW2|CRBN_HUMAN
RAIDFSPYL	0.01227	0.01227	0.01227	0.01227	-0.03093	0.01227	11.85	7538.98	3446.36	5057.65	401.36	373.31	26.85	1080.56	9	0.3	541.288	90.11		1043800	4	F4:24622	MSB66431A.raw	P17676|CEBPB_HUMAN
RALALVVTL	0.12135	0.12135	0.12135	0.12135	0.12495	0.12135	91.8	5726.24	1751.45	6948.67	6103.18	5881.47	26.27	954.623	9	-0.7	478.318	87.24		4662200	2	F2:25693	MSB60102A.raw	O00622|CCN1_HUMAN
RIPEEGLLEV	0.26635	0.26635	0.26635	0.26635	0.26995	0.26635	61.82	19193.9	2121.07	8503.51	2862.13	20494.8	14.9	1153.63	10	-0.2	577.824	80.53		2674300	2	F2:23485	MSB60102A.raw	Q96JB6|LOXL4_HUMAN
RLYPEGLAQL	0.07304	0.07304	0.07304	0.07304	0.07424	0.07304	44.55	390.27	3448.23	22239.8	403.87	2135.7	36.04	1158.64	10	0.5	580.327	82.38		621540	4	F4:22635	MSB66431A.raw	P61421|VA0D1_HUMAN
RQTSQVETV	-0.12063	-0.12063	-0.12063	-0.12063	-0.13323	-0.12063	63.99	14703.2	25469.9	17321.4	22980	14338.3	18.9	1046.54	9	0	524.275	70.21		96687	4	F4:19327	MSB66431A.raw	Q8N2C7|UNC80_HUMAN
RTITVGVYEA	0.2497	0.2497	0.2497	0.2497	0.2065	0.2497	247.3	29916.1	17551.4	26630.4	33834.9	30577.2	26.65	1107.59	10	1.7	554.804	53.12		166410	4	F4:14499	MSB66431A.raw	P24522|GA45A_HUMAN
RVADILTQL	0.11926	0.11926	0.11926	0.11926	0.10656	0.11926	13.29	10574.4	991.89	17304.6	2747.02	2367.26	34.92	1027.6	9	0.8	514.809	88.65		1049100	4	F4:24288	MSB66431A.raw	Q9BZZ5|API5_HUMAN
RVADILTQL	0.11926	0.11926	0.11926	0.11926	0.10656	0.11926	13.29	10574.4	991.89	17304.6	2747.02	2367.26	34.92	1027.6	9	0.8	514.809	88.65		288380	4	F4:24288	MSB66431A.raw	Q9BZZ5|API5_HUMAN
SAIKYLHSL	-0.2572	-0.2572	-0.2572	-0.2572	-0.3004	-0.2572	28.56	5923.62	821.33	7855.24	824.37	1218.19	29.12	1030.58	9	1.3	516.298	57.61		241670	2	F2:16460	MSB60102A.raw	O15075|DCLK1_HUMAN
SGLLKVWQV	-0.06664	-0.06664	-0.06664	-0.06664	-0.06304	-0.06664	229.74	11534.1	28277.6	9433.76	25830.9	17279.7	16.5	1028.6	9	-3.5	515.306	87.11		816760	2	F2:25633	MSB60102A.raw	Q13685|AAMP_HUMAN
SLFAGGMLRV	-0.00105	-0.00105	-0.00105	-0.00105	-0.03905	-0.00105	27.53	17442	24451.8	14490	20421.7	17299	32.83	1049.57	10	-1.7	525.791	91.84		2275800	2	F2:27234	MSB60102A.raw	Q9BVK6|TMED9_HUMAN
SLFPGKLEV	-0.09402	-0.09402	-0.09402	-0.09402	-0.13202	-0.09402	12.35	20001.2	13723.6	7450.67	2855.08	2339.66	23.68	988.559	9	0.2	495.287	88.93		1220500	4	F4:24366	MSB66431A.raw	Q13045|FLII_HUMAN
SLFPGKLEV	-0.09402	-0.09402	-0.09402	-0.09402	-0.13202	-0.09402	12.35	20001.2	13723.6	7450.67	2855.08	2339.66	26.63	988.559	9	-0.4	495.287	83.73		4064100	2	F2:24455	MSB60102A.raw	Q13045|FLII_HUMAN
SLISTILEV	0.08895	0.08895	0.08895	0.08895	0.04575	0.08895	5.92	17703	19874.2	11895.8	6404.57	3839.67	23.21	973.569	9	-1.3	487.791	113.63		348490	4	F4:32799	MSB66431A.raw	Q9Y263|PLAP_HUMAN
SLITLIEKV	0.15524	0.15524	0.15524	0.15524	0.11204	0.15524	13.9	23176.5	32681.4	14072.7	20999.2	14075.8	28	1014.63	9	1.2	508.324	106.63		3227200	2	F2:32550	MSB60102A.raw	O75976|CBPD_HUMAN
SLLDKIIGA	0.06612	0.06612	0.06612	0.06612	0.06972	0.06612	14.74	35635.9	28784.2	25608	23635.8	16466.9	23.35	928.559	9	-1.8	465.286	101.88		1051800	2	F2:28183	MSB66429A.raw	Q6NZI2|CAVN1_HUMAN
SLLDKIIGA	0.06612	0.06612	0.06612	0.06612	0.06972	0.06612	14.74	35635.9	28784.2	25608	23635.8	16466.9	22.9	928.559	9	0.8	465.287	96.24		16738000	2	F2:28631	MSB60102A.raw	Q6NZI2|CAVN1_HUMAN
SLLQTNIAL	0.04673	0.04673	0.04673	0.04673	0.05033	0.04673	103.44	20724.7	3504.12	24543	3295.25	7165.89	24.15	971.565	9	0.4	486.79	97.58		1066100	2	F2:29191	MSB60102A.raw	Q16787|LAMA3_HUMAN
SQFQQEFPSL	-0.08968	-0.08968	-0.08968	-0.08968	-0.12768	-0.08968	84.02	4246.1	15397.1	18764.1	10892.3	8212.98	40.53	1209.57	10	0	605.79	93.17		885530	2	F2:27641	MSB60102A.raw	Q9Y520|PRC2C_HUMAN
SQIPFPLSL	0.02958	0.02958	0.02958	0.02958	-0.01362	0.02958	13.94	4237.98	9817.71	13007.5	1649.46	337.45	29.16	1000.56	9	0.3	501.287	110.65		4567600	2	F2:34224	MSB60102A.raw	Q5HYI7|MTX3_HUMAN
SQLELGVHL	0.17199	0.17199	0.17199	0.17199	0.17559	0.17199	18.16	12512.6	17530	19930.8	12321.9	7437.47	22.68	994.545	9	1.6	498.281	76.77		373620	2	F2:22322	MSB60102A.raw	Q8TDM6|DLG5_HUMAN
SQMATILNL	0.13231	0.13231	0.13231	0.13231	0.18931	0.13231	5.9	2641.25	7338.74	12811.6	5023.68	1575.71	19.48	989.521	9	-2.4	495.767	102.61		308590	2	F2:30906	MSB60102A.raw	Q9H9E3|COG4_HUMAN
SQVEIKLSL	-0.06527	-0.06527	-0.06527	-0.06527	-0.07867	-0.06527	42.8	16103	9317.92	19158.6	7675.03	3426.62	21.43	1015.59	9	-2.5	508.802	83.5		69061	4	F4:22921	MSB66431A.raw	Q13045|FLII_HUMAN
SQWGQWSQV	-0.00559	-0.00559	-0.00559	-0.00559	-0.07749	-0.00559	8.46	9823.87	16108.8	9490.38	20504.1	9605.25	34.78	1104.5	9	-1.1	553.256	86.73		121500	4	F4:23785	MSB66431A.raw	Q01085|TIAR_HUMAN
STIKEVAQA	-0.0721	-0.0721	-0.0721	-0.0721	-0.1153	-0.0721	148.65	35640.1	23391.9	25902.9	26258.4	25776.8	14.75	945.513	9	0.7	473.764	22.44		136530	1	F1:5907	MSB60101A.raw	O15269|SPTC1_HUMAN
STVKVLIRL	-0.03128	-0.03128	-0.03128	-0.03128	-0.04468	-0.03128	192.59	14314	18297.6	22947.4	14448.5	15284.4	20.83	1027.68	9	-0.9	514.845	65.92		175910	4	F4:18060	MSB66431A.raw	Q12905|ILF2_HUMAN
STVKVLIRL	-0.03128	-0.03128	-0.03128	-0.03128	-0.04468	-0.03128	192.59	14314	18297.6	22947.4	14448.5	15284.4	15.48	1027.68	9	-0.4	514.845	66.22		307770	2	F2:19162	MSB60102A.raw	Q12905|ILF2_HUMAN
SVIDHIHLI	0.24312	0.24312	0.24312	0.24312	0.19992	0.24312	4.36	2196.56	14019.1	6239.45	3175.3	963.52	33.47	1045.59	9	1.6	523.804	81.02		1738700	4	F4:22250	MSB66431A.raw	O14908|GIPC1_HUMAN
SVIDHIHLI	0.24312	0.24312	0.24312	0.24312	0.19992	0.24312	4.36	2196.56	14019.1	6239.45	3175.3	963.52	31.59	1045.59	9	0.4	523.803	78.45		3607900	2	F2:22820	MSB60102A.raw	O14908|GIPC1_HUMAN
SVIEQIVYV	0.18911	0.18911	0.18911	0.18911	0.14591	0.18911	2.42	19371.2	21059	9520.41	6234.19	2348.36	43.49	1048.58	9	0.2	525.298	104.33		4315400	4	F4:29142	MSB66431A.raw	Q00653|NFKB2_HUMAN
SVIEQIVYV	0.18911	0.18911	0.18911	0.18911	0.14591	0.18911	2.42	19371.2	21059	9520.41	6234.19	2348.36	43.49	1048.58	9	0.2	525.298	104.33		1288300	4	F4:29142	MSB66431A.raw	Q00653|NFKB2_HUMAN
SVIEQIVYV	0.18911	0.18911	0.18911	0.18911	0.14591	0.18911	2.42	19371.2	21059	9520.41	6234.19	2348.36	31.79	1048.58	9	-1.2	525.297	101.94		7060200	2	F2:30650	MSB60102A.raw	Q00653|NFKB2_HUMAN
SVINFLDQL	0.09129	0.09129	0.09129	0.09129	0.04809	0.09129	11.13	11395	15643.3	18509.4	5780.65	4441.54	29.48	1047.56	9	-2	524.786	112.54		689320	4	F4:32363	MSB66431A.raw	Q14657|LAGE3_HUMAN
SVLDDNKLLTL	-0.1731	-0.1731	-0.1731	-0.1731	-0.1695	-0.1731	249.59	26688.1	18050.4	30064.7	17574.2	21511.3	32.72	1229.69	11	-1.6	615.85	99.13		1012600	4	F4:27263	MSB66431A.raw	Q14204|DYHC1_HUMAN
SVLGAITSV	0.12998	0.12998	0.12998	0.12998	0.13358	0.12998	4.94	22300.7	6625.4	12815.2	6883.12	10525.4	28.7	845.486	9	0.4	423.75	90.34		1168700	2	F2:26597	MSB60102A.raw	P62495|ERF1_HUMAN
SVLGALIGV	0.19028	0.19028	0.19028	0.19028	0.19388	0.19028	2.96	25433	17725.3	14475.1	21278	19763.7	17.67	827.512	9	-1.6	414.762	109.59		23939000	2	F2:33776	MSB60102A.raw	Q96ER9|MITOK_HUMAN
SVLGSLSSV	-0.37732	-0.37732	-0.37732	-0.37732	-0.37372	-0.37732	5.21	23066.6	4108.13	12907.4	5798.38	11989	27.73	847.465	9	-0.3	424.74	82.97		1018200	2	F2:24234	MSB60102A.raw	Q9UKX7|NUP50_HUMAN
SVLNVLHSL	-0.04971	-0.04971	-0.04971	-0.04971	-0.04611	-0.04971	10.99	7213.65	2147.84	15473.3	5051.96	3720.7	32.82	980.566	9	0	491.29	99.01		242420	1	F1:28057	MSB66428A.raw	Q9Y262|EIF3L_HUMAN
SVLNVLHSL	-0.04971	-0.04971	-0.04971	-0.04971	-0.04611	-0.04971	10.99	7213.65	2147.84	15473.3	5051.96	3720.7	32.82	980.566	9	0	491.29	99.01		481260	1	F1:28057	MSB66428A.raw	Q9Y262|EIF3L_HUMAN
SVLQSIEKI	-0.19748	-0.19748	-0.19748	-0.19748	-0.19388	-0.19748	391.06	14420.4	25232.6	13310.1	20055.6	23447.3	16.03	1015.59	9	-0.9	508.803	80.2		706690	2	F2:23366	MSB60102A.raw	Q5T3J3|LRIF1_HUMAN
SVPIEIPTI	0.36642	0.36642	0.36642	0.36642	0.37002	0.36642	235.23	3164.09	24694.6	16681.2	332.22	8861.86	25.25	967.559	9	0.4	484.787	105.45		7046600	2	F2:32023	MSB60102A.raw	Q9NP92|RT30_HUMAN
SVSTQLSLV	-0.28398	-0.28398	-0.28398	-0.28398	-0.23028	-0.28398	98.44	26664.1	14996.3	16050	13355.3	16456.2	20.07	932.518	9	-0.8	467.266	76.12		401190	2	F2:22110	MSB60102A.raw	A4D0T7|SIM30_HUMAN
TAIDILTTV	0.24012	0.24012	0.24012	0.24012	0.19692	0.24012	7.26	23974.5	14388.5	3373.17	6151.31	4545.33	18.29	945.538	9	-0.7	473.776	104.66		785000	4	F4:29280	MSB66431A.raw	Q96P70|IPO9_HUMAN
TAIDILTTV	0.24012	0.24012	0.24012	0.24012	0.19692	0.24012	7.26	23974.5	14388.5	3373.17	6151.31	4545.33	22.2	945.538	9	0	473.776	102.38		1710600	2	F2:30951	MSB60102A.raw	Q96P70|IPO9_HUMAN
TIATALEYV	0.16176	0.16176	0.16176	0.16176	0.14906	0.16176	7.21	24355.7	22978.5	14431.8	12697.4	14125.9	20.28	979.523	9	2.2	490.77	100.82		69073	4	F4:27812	MSB66431A.raw	P78537|BL1S1_HUMAN
TILPKVMQV	-0.40178	-0.40178	-0.40178	-0.40178	-0.39818	-0.40178	20.08	22193.8	18678	9690.74	9371.19	5961.61	19.29	1027.61	9	0.9	514.813	80.43		82700	4	F4:22133	MSB66431A.raw	P55081|MFAP1_HUMAN
TILPKVMQV	-0.40178	-0.40178	-0.40178	-0.40178	-0.39818	-0.40178	20.08	22193.8	18678	9690.74	9371.19	5961.61	22.95	1027.61	9	-1.2	514.812	77.32		1053300	2	F2:22455	MSB60102A.raw	P55081|MFAP1_HUMAN
TLVDEVFRI	0.30112	0.30112	0.30112	0.30112	0.28772	0.30112	19.91	13320.2	34973.9	12400.3	18599.4	11245	32.17	1090.6	9	0.6	546.309	105.88		3119000	2	F2:32218	MSB60102A.raw	P15927|RFA2_HUMAN
TQLELSEQL	-0.05256	-0.05256	-0.05256	-0.05256	-0.04896	-0.05256	42.03	16401.3	25364.3	18381.9	18524.3	11605.2	27.34	1059.54	9	-0.5	530.779	80.48		103240	4	F4:22119	MSB66431A.raw	Q8IWJ2|GCC2_HUMAN
TQTAVITRI	0.28045	0.28045	0.28045	0.28045	0.26785	0.28045	206.12	15302	29571.4	13036.8	24665	16186	26.89	1001.59	9	0.2	501.801	45.97		1522900	2	F2:12947	MSB60102A.raw	Q9H4H8|FA83D_HUMAN
TQVTALIKL	0.06644	0.06644	0.06644	0.06644	0.05304	0.06644	79.45	17308.9	26101.2	23585	19404.8	9675.76	18.5	985.617	9	-0.4	493.816	80.58		1132100	2	F2:23438	MSB60102A.raw	O43847|NRDC_HUMAN
TVADVVLWSV	0.19526	0.19526	0.19526	0.19526	0.18256	0.19526	5.84	25223.3	21574	10873.6	25639.9	21734.2	21.08	1087.59	10	0.3	544.803	110.12		881850	2	F2:33963	MSB60102A.raw	Q13155|AIMP2_HUMAN
TVIAKVNNV	-0.09781	-0.09781	-0.09781	-0.09781	-0.14101	-0.09781	31.41	23432.9	19118.4	15669.4	10702.2	9848.13	18.22	956.566	9	-1.5	479.289	33.33		354920	2	F2:9136	MSB60102A.raw	P26639|SYTC_HUMAN
TVLGKIWKL	0.00672	0.00672	0.00672	0.00672	0.01032	0.00672	26.33	3602.42	16596.8	15575.9	15844.7	3885.81	23.28	1056.67	9	0.1	529.342	79.65		962110	2	F2:23189	MSB60102A.raw	Q9H4M9|EHD1_HUMAN
TVLQELINV	0.07544	0.07544	0.07544	0.07544	0.07904	0.07544	11.15	27282.5	29858.9	14053.8	24687.1	22475.1	30.99	1027.59	9	-1.4	514.802	109.92		3085200	4	F4:31383	MSB66431A.raw	P52732|KIF11_HUMAN
TVLQELINV	0.07544	0.07544	0.07544	0.07544	0.07904	0.07544	11.15	27282.5	29858.9	14053.8	24687.1	22475.1	27.73	1027.59	9	-0.4	514.803	109.48		5803500	2	F2:33738	MSB60102A.raw	P52732|KIF11_HUMAN
VIAEILRGV	0.29609	0.29609	0.29609	0.29609	0.28339	0.29609	7.91	29785.6	17290.3	14179.1	12534.7	14158.5	39.58	968.602	9	-0.3	485.308	86.6		367700	2	F2:23980	MSB66429A.raw	O00567|NOP56_HUMAN
VLLKARLVPA	-0.11418	-0.11418	-0.11418	-0.11418	-0.11058	-0.11418	78.39	34177.1	14763.3	26809	31733.9	30932.9	30.34	1078.72	10	-3	540.367	53.6		2299900	2	F2:15293	MSB60102A.raw	Q6P995|F171B_HUMAN
VLLPLRVTL	0.08068	0.08068	0.08068	0.08068	0.08428	0.08068	132.56	6601.07	3676.49	16249.4	2898.53	4665.41	14.96	1022.69	9	0.6	512.35	102.41		1748800	2	F2:30914	MSB60102A.raw	Q53EU6|GPAT3_HUMAN
VQDKLFVGL	-0.05576	-0.05576	-0.05576	-0.05576	-0.06296	-0.05576	75.48	13407.1	24065	27170.3	11836.4	10236.8	27.89	1017.59	9	-2.1	509.799	81.29		432410	2	F2:23690	MSB60102A.raw	Q7Z7F0|KHDC4_HUMAN
VQLAIFANM	0.30481	0.30481	0.30481	0.30481	0.30841	0.30481	47.53	4383.1	23078.1	19638	16791.1	8760.52	36.47	1005.53	9	-1.1	503.773	109.67		1881300	4	F4:31281	MSB66431A.raw	P0C6T2|OST4_HUMAN
VQLAIFANM	0.30481	0.30481	0.30481	0.30481	0.30841	0.30481	47.53	4383.1	23078.1	19638	16791.1	8760.52	31.96	1005.53	9	0	503.773	109.22		8591900	2	F2:33641	MSB60102A.raw	P0C6T2|OST4_HUMAN
VQVDGKIGL	-0.00216	-0.00216	-0.00216	-0.00216	-0.01556	-0.00216	125.7	30903.8	24194	30379.6	14179.7	12927.2	30.43	927.539	9	0.2	464.777	55.18		3753100	2	F2:15006	MSB66429A.raw	Q9NZJ7|MTCH1_HUMAN
VQVDGKIGL	-0.00216	-0.00216	-0.00216	-0.00216	-0.01556	-0.00216	125.7	30903.8	24194	30379.6	14179.7	12927.2	30.43	927.539	9	0.2	464.777	55.18		2704500	2	F2:15006	MSB66429A.raw	Q9NZJ7|MTCH1_HUMAN
VQVDGKIGL	-0.00216	-0.00216	-0.00216	-0.00216	-0.01556	-0.00216	125.7	30903.8	24194	30379.6	14179.7	12927.2	24.73	927.539	9	0.9	464.777	53.45		12840000	2	F2:15272	MSB60102A.raw	Q9NZJ7|MTCH1_HUMAN
VQYNEPLKV	-0.05601	-0.05601	-0.05601	-0.05601	-0.05481	-0.05601	61.72	15228	35262.7	10673	17021	5763.22	22.02	1088.59	9	-0.5	545.3	53.53		432300	2	F2:15190	MSB60102A.raw	Q14690|RRP5_HUMAN
VTAKVFFDV	0.05786	0.05786	0.05786	0.05786	0.04516	0.05786	29.3	8167.42	26507.6	11451.1	18088.7	20554.5	16.76	1024.56	9	5.6	513.29	90.02		655620	2	F2:24781	MSB66429A.raw	P45877|PPIC_HUMAN
VTTDIQVKV	-0.03568	-0.03568	-0.03568	-0.03568	-0.04828	-0.03568	249.67	27521.5	32486.8	12675.4	16194.1	15003.8	29.8	1001.58	9	1	501.796	52.15		3972300	2	F2:14766	MSB60102A.raw	O00267|SPT5H_HUMAN
YAFPKSITV	-0.20389	-0.20389	-0.20389	-0.20389	-0.24189	-0.20389	7.51	10939.1	6319.22	670.55	282.46	222.55	24.45	1024.56	9	1.4	513.288	78.75		416100	4	F4:21680	MSB66431A.raw	P53985|MOT1_HUMAN
YAIEVDPVL	0.21979	0.21979	0.21979	0.21979	0.17659	0.21979	34.17	18473.8	7885.9	4685.85	931.27	1272.67	16.63	1017.54	9	-0.1	509.776	99.1		653220	2	F2:29679	MSB60102A.raw	Q9H0P0|5NT3A_HUMAN
YIEQTLVTV	0.00082	0.00082	0.00082	0.00082	-0.03168	0.00082	36.9	25753.9	17638	14592.1	9163.34	13004.6	29.01	1064.58	9	-0.4	533.295	82.38		1353600	1	F1:24307	MSB60101A.raw	P25490|TYY1_HUMAN
YIPTELDQV	0.07356	0.07356	0.07356	0.07356	0.07716	0.07356	20.15	20048.7	32164	22974.5	1418.64	10680.5	43.27	1076.54	9	-0.9	539.276	82.93		4461000	4	F4:22711	MSB66431A.raw	Q7L2H7|EIF3M_HUMAN
YIPTELDQV	0.07356	0.07356	0.07356	0.07356	0.07716	0.07356	20.15	20048.7	32164	22974.5	1418.64	10680.5	32.84	1076.54	9	-1	539.276	80.64		1747600	2	F2:23508	MSB60102A.raw	Q7L2H7|EIF3M_HUMAN
YLDPSVLSGV	-0.25512	-0.25512	-0.25512	-0.25512	-0.26232	-0.25512	8.75	19432.5	19175.8	17343.9	3790.39	9603.9	40.08	1048.54	10	-0.7	525.279	97.32		11714000	4	F4:26623	MSB66431A.raw	Q15041|AR6P1_HUMAN
YLDPSVLSGV	-0.25512	-0.25512	-0.25512	-0.25512	-0.26232	-0.25512	8.75	19432.5	19175.8	17343.9	3790.39	9603.9	40.08	1048.54	10	-0.7	525.279	97.32		2743300	4	F4:26623	MSB66431A.raw	Q15041|AR6P1_HUMAN
YLDPSVLSGV	-0.25512	-0.25512	-0.25512	-0.25512	-0.26232	-0.25512	8.75	19432.5	19175.8	17343.9	3790.39	9603.9	38.56	1048.54	10	-0.5	525.279	94.36		33545000	2	F2:27982	MSB60102A.raw	Q15041|AR6P1_HUMAN
YLPELLQTV	0.00083	0.00083	0.00083	0.00083	0.00443	0.00083	3.22	2808.17	22241.4	12037.8	69.14	607.48	28.46	1074.6	9	0.3	538.306	108.04		2634000	4	F4:30685	MSB66431A.raw	O14682|ENC1_HUMAN
YLPELLQTV	0.00083	0.00083	0.00083	0.00083	0.00443	0.00083	3.22	2808.17	22241.4	12037.8	69.14	607.48	29.84	1074.6	9	2.6	538.307	107.16		13409000	2	F2:32727	MSB60102A.raw	O14682|ENC1_HUMAN
YLQASYTYL	-0.13221	-0.13221	-0.13221	-0.13221	-0.09461	-0.13221	12.5	2183.31	6969.22	17120.2	350.1	625.34	36.66	1120.54	9	-1.1	561.279	89.97		625060	2	F2:24835	MSB66429A.raw	P02792|FRIL_HUMAN
YLQASYTYL	-0.13221	-0.13221	-0.13221	-0.13221	-0.09461	-0.13221	12.5	2183.31	6969.22	17120.2	350.1	625.34	36.66	1120.54	9	-1.1	561.279	89.97		1495600	2	F2:24835	MSB66429A.raw	P02792|FRIL_HUMAN
YQDEVFGGF	0.30675	0.30675	0.30675	0.30675	0.29955	0.30675	53.77	3100.34	17435.4	21715.4	12306.6	2481.48	49.7	1060.45	9	-0.6	531.232	98.4		1733100	4	F4:27044	MSB66431A.raw	Q13283|G3BP1_HUMAN
YQLDPKFITSIL	0.0162	0.0162	0.0162	0.0162	0.0198	0.0162	75.48	17046.6	204.89	12915.9	17528	12037	28.76	1436.79	12	0.1	719.403	109.94		1751800	2	F2:33937	MSB60102A.raw	P16422|EPCAM_HUMAN
YQLDPTASISA	-0.05625	-0.05625	-0.05625	-0.05625	-0.05265	-0.05625	120.68	34667.2	28342.2	27324.2	23415.4	26202.5	39.85	1164.57	11	-2.3	583.289	74.55		669600	4	F4:20551	MSB66431A.raw	P45880|VDAC2_HUMAN
YQLPEILRT	0.2289	0.2289	0.2289	0.2289	0.2325	0.2289	31.12	28070.6	38114.2	23890.4	35356.7	17794.8	32.37	1131.63	9	-0.7	566.821	83.54		6452400	2	F2:24372	MSB60102A.raw	Q9H2U1|DHX36_HUMAN
YSIDLSERV	0.01373	0.01373	0.01373	0.01373	-0.02947	0.01373	19.7	21069	27692.6	6805.88	8539.66	6857.77	33.93	1080.55	9	1.4	541.281	69.43		259250	2	F2:19192	MSB66429A.raw	Q6NTF9|RHBD2_HUMAN
YSIDLSERV	0.01373	0.01373	0.01373	0.01373	-0.02947	0.01373	19.7	21069	27692.6	6805.88	8539.66	6857.77	33.93	1080.55	9	1.4	541.281	69.43		135240	2	F2:19192	MSB66429A.raw	Q6NTF9|RHBD2_HUMAN
YTIPDEYRI	0.17501	0.17501	0.17501	0.17501	0.13181	0.17501	29	4152.55	27532.8	6156.9	11618.6	8333.37	25.21	1168.58	9	-2	585.294	77.64		115110	4	F4:21415	MSB66431A.raw	P43243|MATR3_HUMAN
YTQMNAELNYKV	-0.23101	-0.23101	-0.23101	-0.23101	-0.19341	-0.23101	219.91	22137.7	32658.4	21138.2	29054.2	26874.1	52.01	1472.7	12	-2.8	737.354	66.78		133220	2	F2:18449	MSB66429A.raw	Q9NZD2|GLTP_HUMAN
YVFPGVTRL	0.1617	0.1617	0.1617	0.1617	0.1237	0.1617	10.73	8965.92	6140.27	8259.85	548.24	229.75	32.82	1050.59	9	-1.1	526.3	87.59		970120	4	F4:23979	MSB66431A.raw	Q9H0A9|SPC1L_HUMAN
YVFPGVTRL	0.1617	0.1617	0.1617	0.1617	0.1237	0.1617	10.73	8965.92	6140.27	8259.85	548.24	229.75	23.35	1050.59	9	0.3	526.301	82.13		933840	2	F2:23942	MSB60102A.raw	Q9H0A9|SPC1L_HUMAN
YVIDPIKGLKL	-0.12914	-0.12914	-0.12914	-0.12914	-0.17234	-0.12914	385.43	25832.3	18967.4	28781.7	3190.11	11928.5	41.96	1257.77	11	-0.6	420.264	90.08		1529700	2	F2:26590	MSB60102A.raw	Q15149|PLEC_HUMAN
YVIEDDVNM	0.21749	0.21749	0.21749	0.21749	0.17429	0.21749	26.81	27228.5	18820.2	20638.5	5730.64	4250.97	38.94	1096.47	9	-1.1	549.244	75.45		535240	4	F4:20781	MSB66431A.raw	P49736|MCM2_HUMAN
TYINPFVSF	0.07427	0.07427	0.07427	0.07427	0.03107	0.07427	9959.47	10.46	19252.8	26390	8385.92	101.05	29.56	1086.54	9	3.9	544.279	109.98	0	669140	2	F2:33963	MSB60102A.raw	O95486|O95487
AWAPKPYHKF	-0.32144	-0.32144	-0.32144	-0.32144	-0.33414	-0.32144	27665.7	80.78	29459.4	36475.4	7536.46	9285	28.95	1243.65	10	-0.5	622.832	36.98	0	221300	2	F2:10214	MSB60102A.raw	O95819|Q8N4C8|Q9UKE5
YYLNDLERI	0.11579	0.11579	0.11579	0.11579	0.11939	0.11579	2661.04	22.12	33311.1	17070.8	19896.1	1323.4	37.18	1197.6	9	0.7	599.809	89.33	0	956050	4	F4:24455	MSB66431A.raw	P04899|P19086
YYLNDLERI	0.11579	0.11579	0.11579	0.11579	0.11939	0.11579	2661.04	22.12	33311.1	17070.8	19896.1	1323.4	37.18	1197.6	9	0.7	599.809	89.33	0	304410	4	F4:24455	MSB66431A.raw	P04899|P19086
SYYGGNWASF	0.20447	0.20447	0.20447	0.20447	0.20567	0.20447	8732.69	7.45	14931.7	24693.5	12848.7	169.18	28.99	1150.47	10	0.3	576.243	100.35	0	705720	2	F2:27693	MSB66429A.raw	P24386|P26374
GYSEHFVEF	0.28209	0.28209	0.28209	0.28209	0.33579	0.28209	13667.5	32.66	26698.8	33016.9	14385.7	113.27	39.68	1113.48	9	-0.2	557.745	77.8	0	2800100	4	F4:21383	MSB66431A.raw	P36959|Q9P2T1
NYLDQIAKF	-0.06178	-0.06178	-0.06178	-0.06178	-0.05818	-0.06178	21062	33.17	34447.8	29666	26345.8	232.36	30.25	1110.57	9	0.4	556.293	96.48	0	825900	4	F4:26461	MSB66431A.raw	P41229|Q9BY66
NYLDQIAKF	-0.06178	-0.06178	-0.06178	-0.06178	-0.05818	-0.06178	21062	33.17	34447.8	29666	26345.8	232.36	30.25	1110.57	9	0.4	556.293	96.48	0	285100	4	F4:26461	MSB66431A.raw	P41229|Q9BY66
VYAILTHGI	0.21946	0.21946	0.21946	0.21946	0.20676	0.21946	8513.09	20.3	25100	16565	14087.5	2405.26	25.28	985.56	9	-0.7	493.787	76.47	0	118540	2	F2:22184	MSB60102A.raw	P60891|P11908|P21108
RYIPTAAAF	0.16255	0.16255	0.16255	0.16255	0.11935	0.16255	7727.53	10.23	7948.34	25414	4331.81	64.31	24.76	1008.54	9	3.4	505.279	62.12	0	4302200	2	F2:17902	MSB60102A.raw	P61619|Q9H9S3
QYESKVFYL	-0.20847	-0.20847	-0.20847	-0.20847	-0.24097	-0.20847	13222.9	393.71	30633.5	32600.5	15332.8	551	33.95	1175.59	9	1.8	588.802	79.4	0	530060	4	F4:21818	MSB66431A.raw	P61981|Q04917
KYAWVLDKL	0.15807	0.15807	0.15807	0.15807	0.14537	0.15807	8129.69	34.81	26026.2	28391.3	16618.3	1609.34	43.57	1134.64	9	-1.5	568.328	85.64	0	1868500	4	F4:23510	MSB66431A.raw	P68104|Q5VTE0|Q05639
KYAWVLDKL	0.15807	0.15807	0.15807	0.15807	0.14537	0.15807	8129.69	34.81	26026.2	28391.3	16618.3	1609.34	43.57	1134.64	9	-1.5	568.328	85.64	0	1001800	4	F4:23510	MSB66431A.raw	P68104|Q5VTE0|Q05639
KYAWVLDKL	0.15807	0.15807	0.15807	0.15807	0.14537	0.15807	8129.69	34.81	26026.2	28391.3	16618.3	1609.34	14.95	1134.64	9	1.1	379.222	80.2	0	348420	2	F2:23323	MSB60102A.raw	P68104|Q5VTE0|Q05639
IFGVIIDTF	0.34882	0.34882	0.34882	0.34882	0.33782	0.34882	17497	47.38	35979.9	28046	27832	6594.93	33.5	1023.56	9	1	512.79	112.52	0	2172300	1	F1:35435	MSB60101A.raw	Q14571|Q14573|Q14643
PYNPLWAQL	0.14979	0.14979	0.14979	0.14979	0.15189	0.14979	29303	104.49	31817.1	34143.8	27207.9	5154.83	22.17	1100.57	9	-8.3	551.285	107.25	0	7119500	2	F2:32740	MSB60102A.raw	Q8TF40|Q9P278
NYPETLGRLLI	0.19003	0.19003	0.19003	0.19003	0.19363	0.19003	22698.5	371.32	8656.12	9689.59	18857.7	8763.36	38.55	1287.72	11	0.2	644.867	101.2	0	2599800	2	F2:30506	MSB60102A.raw	Q92503|O43304
AYDDKIYYF	-0.06048	-0.06048	-0.06048	-0.06048	-0.06768	-0.06048	7513.74	126.2	28641.2	33789.2	13149	200.91	32.15	1196.54	9	0.8	599.277	82.38		76203	4	F4:22628	MSB66431A.raw	O75326|SEM7A_HUMAN
AYIDYLSHL	-0.06924	-0.06924	-0.06924	-0.06924	-0.11244	-0.06924	874.87	63.5	22755	26816.9	4121.09	74.02	29.39	1093.54	9	-1.7	547.779	100.74		282490	2	F2:27836	MSB66429A.raw	Q12996|CSTF3_HUMAN
AYIPKLLQL	-0.26544	-0.26544	-0.26544	-0.26544	-0.30864	-0.26544	5473.39	97.2	22988.4	31537.5	6541.41	118.48	25.72	1057.65	9	-0.4	529.834	104.29		375920	4	F4:29135	MSB66431A.raw	Q6ZMV5|P4R3C_HUMAN
AYIQESATF	-0.07589	-0.07589	-0.07589	-0.07589	-0.11909	-0.07589	13526.2	18.78	22628.8	32735.9	10709.3	344.68	30.69	1028.48	9	-0.6	515.248	68.75		306970	3	F3:18988	MSB66430A.raw	O95140|MFN2_HUMAN
AYLEAHETF	0.27288	0.27288	0.27288	0.27288	0.27648	0.27288	11965.1	11.61	25742.2	28564.8	13941.8	292.53	26.91	1079.49	9	-1.3	540.753	55		355810	4	F4:14978	MSB66431A.raw	P57740|NU107_HUMAN
AYLEAIHNF	0.28405	0.28405	0.28405	0.28405	0.28765	0.28405	6241.01	8.96	30509.4	29058	18666.3	283.46	39.36	1076.53	9	-0.6	539.271	75.07		2141500	2	F2:21789	MSB60102A.raw	P53680|AP2S1_HUMAN
AYLEAYKEF	0.00827	0.00827	0.00827	0.00827	0.01187	0.00827	18256.2	32.22	31221.7	35615.4	16365.1	298.76	38.08	1132.54	9	-2.5	567.278	73.99		84144	4	F4:20350	MSB66431A.raw	Q9HBU6|EKI1_HUMAN
AYLESFYKF	-0.08287	-0.08287	-0.08287	-0.08287	-0.07927	-0.08287	6759.5	4.56	32170.9	24793.7	20879.8	424.46	28.08	1166.56	9	-1	584.289	98.08		122360	4	F4:26922	MSB66431A.raw	P61421|VA0D1_HUMAN
AYSIVAGVF	0.20997	0.20997	0.20997	0.20997	0.26367	0.20997	25054.4	86.82	24860	32174.1	25083.2	1035.81	20.63	925.491	9	0.6	463.753	106.1		2800600	4	F4:29892	MSB66431A.raw	P13498|CY24A_HUMAN
AYSIVAGVF	0.20997	0.20997	0.20997	0.20997	0.26367	0.20997	25054.4	86.82	24860	32174.1	25083.2	1035.81	25.6	925.491	9	-0.5	463.752	104.02		13968000	2	F2:31470	MSB60102A.raw	P13498|CY24A_HUMAN
AYSRVQYQF	-0.14126	-0.14126	-0.14126	-0.14126	-0.08756	-0.14126	18877.5	10.39	28227.1	29235.5	26801.2	380.81	21.11	1160.56	9	0.1	581.288	54.33		289120	4	F4:14754	MSB66431A.raw	O75815|BCAR3_HUMAN
AYSRVQYQF	-0.14126	-0.14126	-0.14126	-0.14126	-0.08756	-0.14126	18877.5	10.39	28227.1	29235.5	26801.2	380.81	31.98	1160.56	9	-0.9	581.288	54.06		1237200	2	F2:15385	MSB60102A.raw	O75815|BCAR3_HUMAN
DYAYLREHF	0.1503	0.1503	0.1503	0.1503	0.1376	0.1503	34695	291.87	32544.1	33307.2	33965.9	3306.36	25.95	1212.56	9	0.7	607.286	68.37		181660	2	F2:19814	MSB60102A.raw	Q86UK7|ZN598_HUMAN
DYTIGFGKF	0.19232	0.19232	0.19232	0.19232	0.17972	0.19232	38671.2	487.26	37658	36293.5	36746.7	7053.42	45.85	1046.51	9	-1	524.26	94.48		923680	3	F3:26045	MSB66430A.raw	P16144|ITB4_HUMAN
DYTIGFGKF	0.19232	0.19232	0.19232	0.19232	0.17972	0.19232	38671.2	487.26	37658	36293.5	36746.7	7053.42	45.85	1046.51	9	-1	524.26	94.48		310320	3	F3:26045	MSB66430A.raw	P16144|ITB4_HUMAN
EYLPIGGLAEF	0.26192	0.26192	0.26192	0.26192	0.26552	0.26192	2752.34	250.52	6697.32	20136.1	12644.5	7205.62	52.63	1207.61	11	0	604.813	110.88		2844200	4	F4:31720	MSB66431A.raw	P00505|AATM_HUMAN
EYLPIGGLAEF	0.26192	0.26192	0.26192	0.26192	0.26552	0.26192	2752.34	250.52	6697.32	20136.1	12644.5	7205.62	52.63	1207.61	11	0	604.813	110.88		2879000	4	F4:31720	MSB66431A.raw	P00505|AATM_HUMAN
EYLPIGGLAEF	0.26192	0.26192	0.26192	0.26192	0.26552	0.26192	2752.34	250.52	6697.32	20136.1	12644.5	7205.62	46.46	1207.61	11	-0.6	604.813	110.71		12589000	2	F2:34212	MSB60102A.raw	P00505|AATM_HUMAN
EYMEHVYLI	0.10451	0.10451	0.10451	0.10451	0.16151	0.10451	1858.34	6.87	26400.9	8780.92	18570	483.41	26.49	1195.56	9	-3.1	598.785	88.7		1081000	4	F4:24300	MSB66431A.raw	Q9H1P3|OSBL2_HUMAN
EYTDVLQKI	-0.15908	-0.15908	-0.15908	-0.15908	-0.17168	-0.15908	20644.6	299.47	37537.6	21418.9	30539.1	6480.83	34.86	1107.58	9	-0.2	554.798	77.33		2151900	4	F4:21260	MSB66431A.raw	Q8TE68|ES8L1_HUMAN
EYVEKFYRI	0.04147	0.04147	0.04147	0.04147	0.02807	0.04147	9497.36	29.98	36289.6	20636.5	27403.5	3689.72	30.31	1245.64	9	-0.4	623.827	63.15		330000	4	F4:17245	MSB66431A.raw	Q92878|RAD50_HUMAN
FYQPKIQQF	-0.29892	-0.29892	-0.29892	-0.29892	-0.26132	-0.29892	16338.2	12.63	25143	26794.2	7068.17	18.18	36.29	1197.62	9	-1.1	599.816	72.51		1041500	4	F4:19918	MSB66431A.raw	Q9NVI1|FANCI_HUMAN
FYQPKIQQF	-0.29892	-0.29892	-0.29892	-0.29892	-0.26132	-0.29892	16338.2	12.63	25143	26794.2	7068.17	18.18	32.64	1197.62	9	-0.1	599.816	70.91		1554100	2	F2:20570	MSB60102A.raw	Q9NVI1|FANCI_HUMAN
FYSRLLQKF	-0.24662	-0.24662	-0.24662	-0.24662	-0.19292	-0.24662	17726.6	13.12	29089.7	25941.6	20027.4	102.03	37.93	1200.67	9	0.8	401.229	73.69		2889700	2	F2:21356	MSB60102A.raw	Q9H900|ZWILC_HUMAN
FYTVIPHNF	0.19682	0.19682	0.19682	0.19682	0.18422	0.19682	14685.1	10.76	28862.7	21794.8	16850.6	54.28	40.89	1136.57	9	-1.4	569.289	88.98		659590	4	F4:24371	MSB66431A.raw	Q9Y6F1|PARP3_HUMAN
HYSLFPLLF	0.02286	0.02286	0.02286	0.02286	0.07656	0.02286	18165.6	9.64	29447.9	19101.1	21231.5	122.46	15.98	1135.61	9	-1.7	568.81	113.47		660180	2	F2:35345	MSB60102A.raw	Q9BVK2|ALG8_HUMAN
IYFPKKEAVTF	-0.20131	-0.20131	-0.20131	-0.20131	-0.23931	-0.20131	28040.9	48.73	6043.71	23659.6	19193.3	1444.15	25.07	1341.73	11	-3.4	671.872	68.95		303100	2	F2:19911	MSB60102A.raw	Q9Y263|PLAP_HUMAN
IYKPVTDFF	0.0827	0.0827	0.0827	0.0827	0.1527	0.0827	21725.1	9.07	28294.4	25448.1	16881.8	84.39	40.82	1128.59	9	-0.1	565.3	92.66		1641600	4	F4:25302	MSB66431A.raw	P42704|LPPRC_HUMAN
IYKPVTDFF	0.0827	0.0827	0.0827	0.0827	0.1527	0.0827	21725.1	9.07	28294.4	25448.1	16881.8	84.39	40.82	1128.59	9	-0.1	565.3	92.66		608810	4	F4:25302	MSB66431A.raw	P42704|LPPRC_HUMAN
IYKPVTDFF	0.0827	0.0827	0.0827	0.0827	0.1527	0.0827	21725.1	9.07	28294.4	25448.1	16881.8	84.39	31.11	1128.59	9	-0.1	565.3	87.68		2142600	2	F2:25816	MSB60102A.raw	P42704|LPPRC_HUMAN
IYKSIMEQF	-0.25535	-0.25535	-0.25535	-0.25535	-0.18535	-0.25535	27045.6	15.23	34086.7	30938.2	27590.6	195.52	40.33	1157.58	9	-1	579.796	80.68		964620	4	F4:22172	MSB66431A.raw	Q6UXY1|BI2L2_HUMAN
IYKSIMEQF	-0.25535	-0.25535	-0.25535	-0.25535	-0.18535	-0.25535	27045.6	15.23	34086.7	30938.2	27590.6	195.52	28.88	1157.58	9	-0.8	579.796	77.13		1660900	2	F2:22447	MSB60102A.raw	Q6UXY1|BI2L2_HUMAN
IYLEKLKTI	-0.28261	-0.28261	-0.28261	-0.28261	-0.27901	-0.28261	12545	30.49	32145.5	22585.3	12727	1204.77	16.38	1119.69	9	0.1	560.852	65.71		122640	2	F2:19026	MSB60102A.raw	Q15149|PLEC_HUMAN
IYNGKLFDL	-0.07668	-0.07668	-0.07668	-0.07668	-0.07458	-0.07668	13052.9	161.86	28609.3	31846.1	13875.7	237.71	37.83	1081.58	9	-1.5	541.797	92.12		638260	4	F4:25202	MSB66431A.raw	Q99661|KIF2C_HUMAN
IYNGKLFDL	-0.07668	-0.07668	-0.07668	-0.07668	-0.07458	-0.07668	13052.9	161.86	28609.3	31846.1	13875.7	237.71	37.83	1081.58	9	-1.5	541.797	92.12		91377	4	F4:25202	MSB66431A.raw	Q99661|KIF2C_HUMAN
IYPWVHVVI	0.3489	0.3489	0.3489	0.3489	0.3525	0.3489	13629	19.63	23944.5	21181.5	1497.76	404.96	22.18	1124.64	9	-0.1	563.326	104.65		1377900	2	F2:31674	MSB60102A.raw	Q969F9|HPS3_HUMAN
IYSIDFTRF	0.27502	0.27502	0.27502	0.27502	0.32872	0.27502	25991.9	15.87	35138.2	30164.8	20892.7	432.82	14.34	1160.59	9	-4.3	581.298	98.72		580340	2	F2:29538	MSB60102A.raw	A6NIH7|U119B_HUMAN
KWFFQKLRF	-0.13912	-0.13912	-0.13912	-0.13912	-0.17712	-0.13912	19309.9	32.31	32556.8	27526.8	29884.4	3929.06	21.26	1298.73	9	-2.1	650.37	91.2		122000	4	F4:24998	MSB66431A.raw	P61353|RL27_HUMAN
KWYDRRDYVF	0.1638	0.1638	0.1638	0.1638	0.165	0.1638	18038.5	30.29	21999.2	30445.8	21559.8	2094.03	15.86	1446.7	10	-1	483.242	63.41		106510	4	F4:17405	MSB66431A.raw	Q15185|TEBP_HUMAN
KYDEIFYNL	0.34085	0.34085	0.34085	0.34085	0.33365	0.34085	674.33	52.51	25126.6	21779	8261.99	422.8	41.9	1203.58	9	-0.6	602.798	94.69		430840	4	F4:25883	MSB66431A.raw	Q9NZN4|EHD2_HUMAN
KYDEIFYNL	0.34085	0.34085	0.34085	0.34085	0.33365	0.34085	674.33	52.51	25126.6	21779	8261.99	422.8	41.9	1203.58	9	-0.6	602.798	94.69		1241800	4	F4:25883	MSB66431A.raw	Q9NZN4|EHD2_HUMAN
KYFEKQFEL	-0.02299	-0.02299	-0.02299	-0.02299	-0.06099	-0.02299	1327.2	46.02	22655.8	19613.5	5369.8	67.4	37.9	1230.63	9	-1.1	616.321	65.24		445800	4	F4:17876	MSB66431A.raw	Q6P1N9|TATD1_HUMAN
KYFLKPEVL	-0.08498	-0.08498	-0.08498	-0.08498	-0.12298	-0.08498	19227.8	143.94	25062.3	30424.7	7217.4	340.3	26.01	1135.66	9	0	568.839	65.46		122820	4	F4:17962	MSB66431A.raw	Q6PIU2|NCEH1_HUMAN
KYITDWQNVF	0.22918	0.22918	0.22918	0.22918	0.18598	0.22918	14161.8	11.41	24850	29607.3	25431.9	743.78	48.72	1312.65	10	-2	657.329	100.58		3501400	3	F3:27772	MSB66430A.raw	O75340|PDCD6_HUMAN
KYITDWQNVF	0.22918	0.22918	0.22918	0.22918	0.18598	0.22918	14161.8	11.41	24850	29607.3	25431.9	743.78	48.72	1312.65	10	-2	657.329	100.58		2643700	3	F3:27772	MSB66430A.raw	O75340|PDCD6_HUMAN
KYITQGQLLQF	-0.19782	-0.19782	-0.19782	-0.19782	-0.24102	-0.19782	19834.6	52.91	33521.2	34868.1	34117.3	4724.64	38.98	1337.73	11	0.8	669.875	90.79		2124000	4	F4:24875	MSB66431A.raw	Q9NYP7|ELOV5_HUMAN
KYITQGQLLQF	-0.19782	-0.19782	-0.19782	-0.19782	-0.24102	-0.19782	19834.6	52.91	33521.2	34868.1	34117.3	4724.64	40.61	1337.73	11	0.2	669.875	85.55		2717900	2	F2:25084	MSB60102A.raw	Q9NYP7|ELOV5_HUMAN
KYLQSTISF	-0.22906	-0.22906	-0.22906	-0.22906	-0.22546	-0.22906	11570.8	11.98	17803.9	28218	11314.3	299.24	30.86	1085.58	9	1	543.796	72.32		586320	4	F4:19910	MSB66431A.raw	O95985|TOP3B_HUMAN
KYPDIISRI	0.16422	0.16422	0.16422	0.16422	0.16782	0.16422	7519.19	24.28	29888	25303.4	2343.38	425.29	27.28	1103.63	9	-0.1	552.824	67.86		786040	4	F4:18953	MSB66431A.raw	P18858|DNLI1_HUMAN
KYPDIISRI	0.16422	0.16422	0.16422	0.16422	0.16782	0.16422	7519.19	24.28	29888	25303.4	2343.38	425.29	24.15	1103.63	9	-1.9	552.823	67.86		2692200	2	F2:19677	MSB60102A.raw	P18858|DNLI1_HUMAN
KYPHYFPLL	0.11971	0.11971	0.11971	0.11971	0.12331	0.11971	3286.24	7.77	23180.2	26423.7	529.92	117.51	37.07	1176.63	9	-1.8	589.323	89.59		667130	4	F4:24503	MSB66431A.raw	P52888|THOP1_HUMAN
KYQELQVLF	-0.02833	-0.02833	-0.02833	-0.02833	0.00927	-0.02833	11408	6.99	28568.2	25987.4	21483.2	298.4	15.68	1166.63	9	-5.5	584.321	88.96		583250	2	F2:26178	MSB60102A.raw	Q9H9H4|VP37B_HUMAN
KYVENFGLI	0.24017	0.24017	0.24017	0.24017	0.22677	0.24017	4321.83	12.29	25729.4	17966.8	10325.3	1394.06	20.3	1081.58	9	-1.5	541.797	84.78		163460	4	F4:23296	MSB66431A.raw	Q15005|SPCS2_HUMAN
LFIATSQKF	-0.25912	-0.25912	-0.25912	-0.25912	-0.30232	-0.25912	16092.2	39.03	25084.8	24600.7	15827.5	688.66	27.67	1053.59	9	0.2	527.8	71.22		462010	4	F4:19559	MSB66431A.raw	Q6IBW4|CNDH2_HUMAN
LLPSRQFGF	-0.11011	-0.11011	-0.11011	-0.11011	-0.10651	-0.11011	3846.91	306.75	22219.5	26272.6	1565.02	3980.84	29.87	1063.58	9	-0.6	532.798	76.01		5028600	2	F2:22037	MSB60102A.raw	P62244|RS15A_HUMAN
LYAPYSTHF	-0.10613	-0.10613	-0.10613	-0.10613	-0.11883	-0.10613	13816.7	9.4	19542.2	22757.3	5007.67	38.61	24.67	1097.52	9	-1.8	549.765	67.39		922830	2	F2:19527	MSB60102A.raw	Q8NFJ5|RAI3_HUMAN
LYFHINQTL	0.11898	0.11898	0.11898	0.11898	0.08098	0.11898	5275.52	45.69	21194.8	14578.2	4345.33	83.21	27.46	1147.6	9	-2	574.807	84.29		1829900	2	F2:24599	MSB60102A.raw	Q969W3|F104A_HUMAN
LYGRNFNYL	0.15936	0.15936	0.15936	0.15936	0.14836	0.15936	13843.3	33.05	23633.3	28830.6	6675.26	370.5	16.26	1158.58	9	-3	580.297	74.97		238050	4	F4:20617	MSB66431A.raw	Q5XG87|PAPD7_HUMAN
LYGRNFNYL	0.15936	0.15936	0.15936	0.15936	0.14836	0.15936	13843.3	33.05	23633.3	28830.6	6675.26	370.5	25.59	1158.58	9	-0.4	580.298	73.51		461600	2	F2:21289	MSB60102A.raw	Q5XG87|PAPD7_HUMAN
LYIPIFSTF	0.1549	0.1549	0.1549	0.1549	0.1117	0.1549	6087.55	4.64	20993.7	16146.7	9796.48	84.09	30.26	1099.6	9	0.1	550.805	115.75		1846400	2	F2:36262	MSB60102A.raw	Q9C0I1|MTMRC_HUMAN
LYLKVKGNVF	-0.33984	-0.33984	-0.33984	-0.33984	-0.33624	-0.33984	26992.7	74.02	19702.7	30368.1	26849.4	3662.87	25.37	1179.7	10	0.7	590.859	68.81		214700	4	F4:18941	MSB66431A.raw	P84098|RL19_HUMAN
LYLKVKGNVF	-0.33984	-0.33984	-0.33984	-0.33984	-0.33624	-0.33984	26992.7	74.02	19702.7	30368.1	26849.4	3662.87	25.37	1179.7	10	0.7	590.859	68.81		72536	4	F4:18941	MSB66431A.raw	P84098|RL19_HUMAN
LYPEVFEKF	0.20605	0.20605	0.20605	0.20605	0.20965	0.20605	13660.1	7.94	34128.3	28178.6	7220.13	237.07	38.18	1170.6	9	-0.2	586.305	96.92		3698200	4	F4:26573	MSB66431A.raw	Q6PL18|ATAD2_HUMAN
LYPEVFEKF	0.20605	0.20605	0.20605	0.20605	0.20965	0.20605	13660.1	7.94	34128.3	28178.6	7220.13	237.07	35	1170.6	9	-0.1	586.305	92.19		15964000	2	F2:27361	MSB60102A.raw	Q6PL18|ATAD2_HUMAN
LYQDGVFKF	0.02938	0.02938	0.02938	0.02938	0.06698	0.02938	14368.7	9.7	32074.3	25782.4	23983.9	185.81	40.05	1115.57	9	-0.7	558.789	87.95		2095100	4	F4:24105	MSB66431A.raw	Q9H8T0|AKTIP_HUMAN
LYQHEINLF	0.20579	0.20579	0.20579	0.20579	0.24339	0.20579	25036.5	11.14	35465.5	31761.8	24036.4	655.69	21.81	1175.6	9	-1.3	588.805	85.2		73387	4	F4:23372	MSB66431A.raw	Q03701|CEBPZ_HUMAN
LYQPNFNTNF	0.08183	0.08183	0.08183	0.08183	0.11943	0.08183	10599.6	8.79	25994.1	27969	7864.25	408.69	42.62	1256.58	10	1.2	629.299	92.66		665410	4	F4:25321	MSB66431A.raw	Q7L576|CYFP1_HUMAN
LYSNIAFNL	0.20124	0.20124	0.20124	0.20124	0.25494	0.20124	4542.82	30.31	24917.9	16585.4	13567.4	223.85	15.81	1053.55	9	-9.3	527.777	104.73		3902600	2	F2:31906	MSB60102A.raw	Q14674|ESPL1_HUMAN
LYYDAIWHF	0.39034	0.39034	0.39034	0.39034	0.39154	0.39034	4587.47	13.61	35833.5	16310.7	21030.3	123.99	36.36	1226.58	9	-0.2	614.295	107.92		12936000	2	F2:33079	MSB60102A.raw	Q92482|AQP3_HUMAN
NYAAALETF	0.18691	0.18691	0.18691	0.18691	0.17421	0.18691	15778.1	10.33	24237.7	26842.7	17977.3	214.5	39.31	998.471	9	-0.6	500.242	92.13		859590	4	F4:25232	MSB66431A.raw	Q9Y2Z0|SGT1_HUMAN
NYISGIQTI	-0.04007	-0.04007	-0.04007	-0.04007	-0.08327	-0.04007	5659.65	12.77	23856.3	16132	10156.6	214.7	24.86	1007.53	9	-0.7	504.771	84.09		1917500	4	F4:23023	MSB66431A.raw	Q15393|SF3B3_HUMAN
NYLHLDYNF	0.03213	0.03213	0.03213	0.03213	0.03573	0.03213	14796.6	8.54	32878.9	22829.3	33206.1	1169.61	30.77	1197.55	9	-3.1	599.778	97.07		357700	2	F2:26792	MSB66429A.raw	Q6P2Q9|PRP8_HUMAN
NYNAVFNLL	0.17573	0.17573	0.17573	0.17573	0.17783	0.17573	9530.92	30.77	23321.3	20623.8	12284	96.27	16.55	1066.54	9	-0.6	534.279	110.22		4256700	2	F2:34038	MSB60102A.raw	Q8IYR2|SMYD4_HUMAN
NYRDTFFNL	0.28214	0.28214	0.28214	0.28214	0.26534	0.28214	11996.3	104.86	18756.4	26114.2	12474.7	109.04	14.9	1188.56	9	-2.1	595.284	90.75		489110	2	F2:26801	MSB60102A.raw	Q9NY97|B3GN2_HUMAN
NYSNIRFQF	0.14923	0.14923	0.14923	0.14923	0.20293	0.14923	19937.9	12.06	21913	23803.7	25830.4	71.9	33.69	1187.57	9	-1.2	594.793	81.04		3668100	2	F2:23611	MSB60102A.raw	Q9Y217|MTMR6_HUMAN
NYSPYVNYF	-0.03722	-0.03722	-0.03722	-0.03722	0.01648	-0.03722	17407.1	13.51	28613.4	24434.7	10355.3	26.17	38.83	1165.51	9	-2.5	583.76	96.6		2590500	3	F3:26620	MSB66430A.raw	Q7Z388|D19L4_HUMAN
NYSPYVNYF	-0.03722	-0.03722	-0.03722	-0.03722	0.01648	-0.03722	17407.1	13.51	28613.4	24434.7	10355.3	26.17	30.8	1165.51	9	-3.3	583.759	93.14		4602700	2	F2:27620	MSB60102A.raw	Q7Z388|D19L4_HUMAN
NYVQAVEEF	0.1168	0.1168	0.1168	0.1168	0.1034	0.1168	19589.6	37.46	29632	30490.6	23367.8	221.75	30.1	1097.5	9	-0.2	549.759	89.85		269220	4	F4:24607	MSB66431A.raw	P49321|NASP_HUMAN
PQPDVFPLF	0.15328	0.15328	0.15328	0.15328	0.15688	0.15328	5923.23	257.35	38745	32382.2	15690.3	7505.61	30.54	1058.54	9	-0.8	530.279	111.43		6476100	4	F4:31918	MSB66431A.raw	Q9NY61|AATF_HUMAN
PQPDVFPLF	0.15328	0.15328	0.15328	0.15328	0.15688	0.15328	5923.23	257.35	38745	32382.2	15690.3	7505.61	30.54	1058.54	9	-0.8	530.279	111.43		4652900	4	F4:31918	MSB66431A.raw	Q9NY61|AATF_HUMAN
QYAGKYVLF	-0.13832	-0.13832	-0.13832	-0.13832	-0.15102	-0.13832	22995.4	11.08	31685.6	32610.7	18890.6	349.98	23.66	1087.57	9	-2.3	544.791	80.68		530250	4	F4:22203	MSB66431A.raw	P22352|GPX3_HUMAN
QYLKVEQLF	-0.19039	-0.19039	-0.19039	-0.19039	-0.18679	-0.19039	21464.6	13.34	36195.8	26868.9	35030.7	1937.55	20.38	1166.63	9	-1.6	584.323	89.99		917640	2	F2:26634	MSB60102A.raw	Q07912|ACK1_HUMAN
QYPVIIHLI	0.31364	0.31364	0.31364	0.31364	0.31724	0.31364	8943.73	11.23	33361.6	21905.2	7474.33	1374.97	32.37	1094.65	9	0	548.332	105.45		5274500	4	F4:29558	MSB66431A.raw	Q9BW60|ELOV1_HUMAN
QYPVIIHLI	0.31364	0.31364	0.31364	0.31364	0.31724	0.31364	8943.73	11.23	33361.6	21905.2	7474.33	1374.97	32.37	1094.65	9	0	548.332	105.45		1692200	4	F4:29558	MSB66431A.raw	Q9BW60|ELOV1_HUMAN
QYPVIIHLI	0.31364	0.31364	0.31364	0.31364	0.31724	0.31364	8943.73	11.23	33361.6	21905.2	7474.33	1374.97	29.77	1094.65	9	-0.2	548.332	101.45		14937000	2	F2:30762	MSB60102A.raw	Q9BW60|ELOV1_HUMAN
RFVNVVPTF	0.09927	0.09927	0.09927	0.09927	0.08587	0.09927	5565.53	17.9	16239.2	23396.9	14001.5	502	39.73	1077.6	9	0.2	539.806	89.14		2030000	4	F4:24409	MSB66431A.raw	P62861|RS30_HUMAN
RFVNVVPTF	0.09927	0.09927	0.09927	0.09927	0.08587	0.09927	5565.53	17.9	16239.2	23396.9	14001.5	502	32.73	1077.6	9	-1	539.805	83.75		4981200	2	F2:24489	MSB60102A.raw	P62861|RS30_HUMAN
RLPEEWSQW	0.19586	0.19586	0.19586	0.19586	0.19946	0.19586	8758.62	193.07	26906.4	30125.3	8104.84	13985.6	43.06	1229.58	9	-1.4	615.798	88.41		1185000	4	F4:24189	MSB66431A.raw	P04792|HSPB1_HUMAN
RLPEEWSQW	0.19586	0.19586	0.19586	0.19586	0.19946	0.19586	8758.62	193.07	26906.4	30125.3	8104.84	13985.6	43.06	1229.58	9	-1.4	615.798	88.41		708380	4	F4:24189	MSB66431A.raw	P04792|HSPB1_HUMAN
RWPKKSAEFLL	-0.36703	-0.36703	-0.36703	-0.36703	-0.36343	-0.36703	20252.5	232.76	5065.65	21205.1	11608.8	13684.7	43.34	1373.78	11	-0.4	458.934	65.31		5087000	2	F2:18826	MSB60102A.raw	P18621|RL17_HUMAN
RWSPVRPLVF	0.03006	0.03006	0.03006	0.03006	0.08376	0.03006	19334	16.47	13850.5	28669.8	4766.28	2270.82	42.43	1255.72	10	-0.2	628.867	89.29		6315500	4	F4:24441	MSB66431A.raw	Q96EX3|DC2I2_HUMAN
RWSPVRPLVF	0.03006	0.03006	0.03006	0.03006	0.08376	0.03006	19334	16.47	13850.5	28669.8	4766.28	2270.82	42.43	1255.72	10	-0.2	628.867	89.29		995870	4	F4:24441	MSB66431A.raw	Q96EX3|DC2I2_HUMAN
RWSPVRPLVF	0.03006	0.03006	0.03006	0.03006	0.08376	0.03006	19334	16.47	13850.5	28669.8	4766.28	2270.82	40.67	1255.72	10	0.2	628.867	82.82		25610000	2	F2:24131	MSB60102A.raw	Q96EX3|DC2I2_HUMAN
RYFKTPRKF	-0.23396	-0.23396	-0.23396	-0.23396	-0.27196	-0.23396	28888	30.63	24218	28976.6	17697.3	149.27	21.26	1241.7	9	0.4	414.909	25.65		510840	2	F2:6909	MSB60102A.raw	Q9ULV3|CIZ1_HUMAN
RYISPDQLADL	-0.18973	-0.18973	-0.18973	-0.18973	-0.23293	-0.18973	9014.17	460.48	23249.5	34957.3	5662.42	5345.1	30.93	1289.66	11	-2.7	645.836	82.63		556270	4	F4:22664	MSB66431A.raw	P06733|ENOA_HUMAN
RYISPDQLADL	-0.18973	-0.18973	-0.18973	-0.18973	-0.23293	-0.18973	9014.17	460.48	23249.5	34957.3	5662.42	5345.1	30.93	1289.66	11	-2.7	645.836	82.63		204840	4	F4:22664	MSB66431A.raw	P06733|ENOA_HUMAN
RYKLYQEMF	-0.2119	-0.2119	-0.2119	-0.2119	-0.1419	-0.2119	30355.6	26.19	29802.7	34147.9	25675.2	496.63	41.94	1276.63	9	0.5	426.55	70.22		120480	4	F4:19355	MSB66431A.raw	Q14204|DYHC1_HUMAN
RYKLYQEMF	-0.2119	-0.2119	-0.2119	-0.2119	-0.1419	-0.2119	30355.6	26.19	29802.7	34147.9	25675.2	496.63	41.94	1276.63	9	0.5	426.55	70.22		55248	4	F4:19355	MSB66431A.raw	Q14204|DYHC1_HUMAN
RYKLYQEMF	-0.2119	-0.2119	-0.2119	-0.2119	-0.1419	-0.2119	30355.6	26.19	29802.7	34147.9	25675.2	496.63	35.69	1276.63	9	2.9	639.323	71.07		333020	2	F2:20582	MSB60102A.raw	Q14204|DYHC1_HUMAN
RYLDEINLL	0.22956	0.22956	0.22956	0.22956	0.23316	0.22956	3175.89	24.84	27505.7	25276.9	9835.25	256	23.79	1147.62	9	-0.4	574.819	94.6		6516700	2	F2:28198	MSB60102A.raw	P30679|GNA15_HUMAN
RYLSPKYIKMF	-0.55379	-0.55379	-0.55379	-0.55379	-0.55019	-0.55379	20656.9	47.07	31446.8	34221.9	20425.3	4514.55	29.68	1444.79	11	-1.2	482.603	69.53		132940	4	F4:19174	MSB66431A.raw	P60842|IF4A1_HUMAN
RYQDIIHSI	0.17024	0.17024	0.17024	0.17024	0.20784	0.17024	3085.35	6.3	15314.2	15059.2	7469.48	166.38	15.53	1143.6	9	1.4	572.81	61.54		127780	4	F4:16810	MSB66431A.raw	Q9UIG0|BAZ1B_HUMAN
RYQQWMERF	0.01098	0.01098	0.01098	0.01098	0.04858	0.01098	20268.5	5.55	26826.4	31115.5	25026	454.81	28.41	1342.62	9	-1.2	672.318	67.53		145170	4	F4:18588	MSB66431A.raw	Q9BQ52|RNZ2_HUMAN
RYSRKGFLF	-0.0874	-0.0874	-0.0874	-0.0874	-0.0337	-0.0874	19121.3	5.61	18992.9	27905.9	15359.7	219.71	35.25	1172.65	9	1	391.889	48.83		2690400	2	F2:13782	MSB60102A.raw	O00267|SPT5H_HUMAN
RYVPRASYF	-0.05231	-0.05231	-0.05231	-0.05231	-0.06571	-0.05231	16320.4	12.07	13014.8	29659.9	4915.55	28.93	18.02	1157.6	9	1.1	579.807	46.83		527380	2	F2:13186	MSB60102A.raw	P30281|CCND3_HUMAN
SYADQMFLL	-0.15076	-0.15076	-0.15076	-0.15076	-0.16346	-0.15076	1676.96	33.48	22072.9	22061	6013.38	62.39	31.51	1086.51	9	-0.8	544.26	110.17		2899300	2	F2:33963	MSB60102A.raw	Q8TEL6|TP4AP_HUMAN
SYILTHFIF	0.27685	0.27685	0.27685	0.27685	0.23365	0.27685	12424.5	10.42	28947.8	24460	21105.3	442.58	14.83	1139.6	9	-5.9	570.805	93.58		200980	4	F4:25587	MSB66431A.raw	Q9NTG1|PKDRE_HUMAN
SYIPSTVFF	0.01072	0.01072	0.01072	0.01072	-0.03248	0.01072	7767.85	9.34	20970.8	23425.3	5030.37	38.72	31.71	1059.53	9	0	530.771	109.18		2296700	2	F2:33660	MSB60102A.raw	Q9NX01|TXN4B_HUMAN
SYKNGFLNL	0.05355	0.05355	0.05355	0.05355	0.12355	0.05355	15177	63.27	17612.1	31287.3	7653.55	134.15	24.1	1054.54	9	-0.4	528.279	76.98		724070	2	F2:22374	MSB60102A.raw	P22314|UBA1_HUMAN
SYLPFTEAF	0.24314	0.24314	0.24314	0.24314	0.24674	0.24314	9293.15	8.99	18595.8	23789	7013.17	59.87	29.22	1073.51	9	2.1	537.762	109.42		1102200	2	F2:33742	MSB60102A.raw	Q9NZV5|SELN_HUMAN
SYNPLWLRI	0.20533	0.20533	0.20533	0.20533	0.20743	0.20533	12241.4	14.42	24375.5	14564.4	17495.5	647.76	28.23	1160.63	9	-0.1	581.324	102.96		2761900	2	F2:31026	MSB60102A.raw	Q8IZT6|ASPM_HUMAN
SYPDLLPTF	0.0108	0.0108	0.0108	0.0108	0.0144	0.0108	8555.1	11.54	25499.9	28985.7	2181.33	77.77	23.44	1051.52	9	-1.5	526.768	109.58		1774300	2	F2:33786	MSB60102A.raw	P41214|EIF2D_HUMAN
SYPKIIEEF	0.17728	0.17728	0.17728	0.17728	0.18088	0.17728	15455.9	10.27	27932.2	33122.4	4826.95	133.64	24.61	1124.58	9	-0.5	563.295	88.36		1107000	4	F4:24373	MSB66431A.raw	Q9BXW9|FACD2_HUMAN
SYPTFFPRF	0.28054	0.28054	0.28054	0.28054	0.28414	0.28054	12927.8	5.8	28549.4	27088.7	2482.23	65.51	32.56	1160.57	9	-1.7	581.289	101.94		3905100	2	F2:30687	MSB60102A.raw	Q14527|HLTF_HUMAN
SYVQVTSNF	-0.16982	-0.16982	-0.16982	-0.16982	-0.18322	-0.16982	14402.5	12.23	18807.8	28661.1	12397.4	103.99	38.1	1043.49	9	-0.7	522.753	70.85		2058600	2	F2:20504	MSB60102A.raw	Q9UHB7|AFF4_HUMAN
SYVRSLPFF	-0.04702	-0.04702	-0.04702	-0.04702	-0.06042	-0.04702	8427.58	7.88	25944.9	28619.6	14133.3	244.7	34.53	1114.58	9	1	558.298	96.7		4815200	2	F2:28955	MSB60102A.raw	Q9Y5R8|TPPC1_HUMAN
TYDYNFHSF	0.03802	0.03802	0.03802	0.03802	0.03082	0.03802	9745.21	17.75	14296	25627.7	5194.75	59.61	35.79	1192.48	9	-1.6	597.248	74.94		566450	4	F4:20623	MSB66431A.raw	Q9NR48|ASH1L_HUMAN
TYGKIDLGF	-0.04508	-0.04508	-0.04508	-0.04508	-0.05608	-0.04508	26081.4	27.5	32673.3	32964.4	32356.6	2776.78	18.83	1012.52	9	-2.1	507.268	82.99		270220	4	F4:22828	MSB66431A.raw	Q8TCG1|CIP2A_HUMAN
TYIPGTQITF	0.1288	0.1288	0.1288	0.1288	0.0856	0.1288	14284.4	13.02	21010.5	26519.4	4822.72	309.51	19.65	1139.59	10	-0.9	570.8	103.92		2033800	2	F2:31482	MSB60102A.raw	O75376|NCOR1_HUMAN
TYLKAVKLF	-0.33212	-0.33212	-0.33212	-0.33212	-0.32852	-0.33212	25131.8	11.13	32961.9	30940.6	25274.7	413.46	38.08	1081.65	9	-1	541.833	76.23		25075	4	F4:20988	MSB66431A.raw	P48200|IREB2_HUMAN
TYLKAVKLF	-0.33212	-0.33212	-0.33212	-0.33212	-0.32852	-0.33212	25131.8	11.13	32961.9	30940.6	25274.7	413.46	38.08	1081.65	9	-1	541.833	76.23		45177	4	F4:20988	MSB66431A.raw	P48200|IREB2_HUMAN
TYLPAGQSVLL	-0.18383	-0.18383	-0.18383	-0.18383	-0.18023	-0.18383	2964.76	183.83	2143.75	16529.2	2521.69	3127.03	28.98	1160.64	11	-1	581.329	100.6		702750	2	F2:27828	MSB66429A.raw	P35232|PHB_HUMAN
TYSPALNKMF	-0.32825	-0.32825	-0.32825	-0.32825	-0.27455	-0.32825	27707.3	46.3	29943	33652.4	12434.6	1422.45	38.53	1170.57	10	-0.9	586.294	78.85		255910	4	F4:21702	MSB66431A.raw	P04637|P53_HUMAN
TYSPALNKMF	-0.32825	-0.32825	-0.32825	-0.32825	-0.27455	-0.32825	27707.3	46.3	29943	33652.4	12434.6	1422.45	29.9	1170.57	10	1	586.295	75.86		2509600	2	F2:22079	MSB60102A.raw	P04637|P53_HUMAN
TYTDVTPRQFF	0.12148	0.12148	0.12148	0.12148	0.10888	0.12148	24324.1	105.28	31376.1	35203.2	28000.8	1838.46	44.66	1373.66	11	-1.9	687.837	83.76		486190	4	F4:23003	MSB66431A.raw	Q9NQZ5|STAR7_HUMAN
TYTDVTPRQFF	0.12148	0.12148	0.12148	0.12148	0.10888	0.12148	24324.1	105.28	31376.1	35203.2	28000.8	1838.46	28.07	1373.66	11	1	687.839	80.21		849090	2	F2:23308	MSB60102A.raw	Q9NQZ5|STAR7_HUMAN
VFTEVANLF	0.17844	0.17844	0.17844	0.17844	0.16584	0.17844	11253.9	33.11	29450.1	23763.8	15807.3	869.5	31.92	1038.54	9	-1.1	520.276	108.51		5007300	2	F2:33336	MSB60102A.raw	O75182|SIN3B_HUMAN
VLLPKLPQF	-0.31224	-0.31224	-0.31224	-0.31224	-0.30864	-0.31224	715.24	480.98	21481.3	18705.9	11597.3	3827.85	31.82	1053.66	9	0.2	527.837	101.64		1988600	2	F2:30659	MSB60102A.raw	Q53FV1|ORML2_HUMAN
VYAPPVGGFSF	0.09798	0.09798	0.09798	0.09798	0.08528	0.09798	20529.4	19.67	7478.78	25134.5	6241.28	1134.97	22.76	1139.57	11	0.6	570.79	105.14		8881900	2	F2:31915	MSB60102A.raw	Q99436|PSB7_HUMAN
VYAQVARLF	0.01037	0.01037	0.01037	0.01037	-0.00233	0.01037	22888.6	8.31	25633.8	27038.3	12319.4	78.92	31.03	1065.6	9	-0.1	533.806	80.68		547600	2	F2:23530	MSB60102A.raw	Q96ST3|SIN3A_HUMAN
VYEEILHQI	0.21203	0.21203	0.21203	0.21203	0.17953	0.21203	7707.57	47.81	31944.4	19349.8	16213.9	1457.17	40.55	1142.6	9	-5.9	572.303	81.29		728590	2	F2:22531	MSB66429A.raw	Q9BZQ8|NIBA1_HUMAN
VYEEILHQI	0.21203	0.21203	0.21203	0.21203	0.17953	0.21203	7707.57	47.81	31944.4	19349.8	16213.9	1457.17	40.55	1142.6	9	-5.9	572.303	81.29		50245	2	F2:22531	MSB66429A.raw	Q9BZQ8|NIBA1_HUMAN
VYEYVVERF	0.22258	0.22258	0.22258	0.22258	0.19008	0.22258	26189.5	34.5	36625.3	32287.4	26337.5	1038.23	42.79	1202.6	9	-3.8	602.304	78.23		501750	4	F4:21508	MSB66431A.raw	Q5TAX3|TUT4_HUMAN
VYFPDQHINF	0.07463	0.07463	0.07463	0.07463	0.03663	0.07463	22459.1	17.66	31877.1	26016.6	10647.6	394.96	40.62	1278.6	10	-0.5	640.309	88.7		2403000	4	F4:24316	MSB66431A.raw	Q8TEW8|PAR3L_HUMAN
VYFPDQHINF	0.07463	0.07463	0.07463	0.07463	0.03663	0.07463	22459.1	17.66	31877.1	26016.6	10647.6	394.96	40.62	1278.6	10	-0.5	640.309	88.7		1086300	4	F4:24316	MSB66431A.raw	Q8TEW8|PAR3L_HUMAN
VYIGVHVPF	0.17631	0.17631	0.17631	0.17631	0.13311	0.17631	8727.78	14.76	19395.5	24766.6	14211.5	206.39	35.16	1029.56	9	-0.1	515.79	97.31		6151600	2	F2:26837	MSB66429A.raw	Q9Y6M7|S4A7_HUMAN
VYIGVHVPF	0.17631	0.17631	0.17631	0.17631	0.13311	0.17631	8727.78	14.76	19395.5	24766.6	14211.5	206.39	32.13	1029.56	9	1.2	515.79	90.48		22898000	2	F2:26679	MSB60102A.raw	Q9Y6M7|S4A7_HUMAN
VYKKSIFVF	-0.1999	-0.1999	-0.1999	-0.1999	-0.1299	-0.1999	23174.7	9.21	29070.8	30018.3	21136.8	104.63	26.71	1129.65	9	0.5	565.834	72.15		128570	2	F2:20892	MSB60102A.raw	O95139|NDUB6_HUMAN
VYLDHAGATLF	0.18443	0.18443	0.18443	0.18443	0.18803	0.18443	8727.13	28.44	26606.2	30826.3	23006.8	1904.28	30.67	1205.61	11	-0.2	603.811	84.95		1302200	4	F4:23245	MSB66431A.raw	Q96EN8|MOCOS_HUMAN
VYLDKFIRL	0.06148	0.06148	0.06148	0.06148	0.06508	0.06148	6680.31	42.89	31406.4	26155.2	8427.3	197.5	39.89	1165.69	9	-0.2	583.85	92.61		1612700	4	F4:25313	MSB66431A.raw	Q9NVN8|GNL3L_HUMAN
VYLDKFIRL	0.06148	0.06148	0.06148	0.06148	0.06508	0.06148	6680.31	42.89	31406.4	26155.2	8427.3	197.5	39.89	1165.69	9	-0.2	583.85	92.61		489420	4	F4:25313	MSB66431A.raw	Q9NVN8|GNL3L_HUMAN
VYMDWYEKF	0.13604	0.13604	0.13604	0.13604	0.19304	0.13604	9537.73	2.89	30714.8	19780	17421.8	87.67	24.52	1279.56	9	-3.7	640.784	101.61		1089100	4	F4:28183	MSB66431A.raw	O75643|U520_HUMAN
VYNKVHITL	-0.01345	-0.01345	-0.01345	-0.01345	-0.01135	-0.01345	12079.6	25.43	15316.7	21999.2	6180.53	74.5	17.79	1085.62	9	1.5	362.882	52.53		325710	2	F2:14922	MSB60102A.raw	P61457|PHS_HUMAN
VYNPVIYVF	0.17322	0.17322	0.17322	0.17322	0.17532	0.17322	9894.91	5.27	24892.6	18929.5	14065.4	33.32	31.64	1112.59	9	1.5	557.303	110.12		2831900	2	F2:34006	MSB60102A.raw	Q9H1Y3|OPN3_HUMAN
VYPASPSSWLI	-0.2725	-0.2725	-0.2725	-0.2725	-0.2689	-0.2725	6187.49	27.57	4093.22	2225.58	7209.36	5540.06	22.03	1218.63	11	-1.2	610.321	109.08		2210800	2	F2:33622	MSB60102A.raw	P50416|CPT1A_HUMAN
VYPGDPLRF	0.06254	0.06254	0.06254	0.06254	0.06614	0.06254	30421.1	47.45	35005.3	35882.7	11022.2	400.6	20.22	1062.55	9	-0.6	532.282	81.24		2124500	4	F4:22271	MSB66431A.raw	Q9BSV6|SEN34_HUMAN
VYPGDPLRF	0.06254	0.06254	0.06254	0.06254	0.06614	0.06254	30421.1	47.45	35005.3	35882.7	11022.2	400.6	22.99	1062.55	9	-1.3	532.282	77.78		5915200	2	F2:22565	MSB60102A.raw	Q9BSV6|SEN34_HUMAN
VYQLRFQFL	0.08248	0.08248	0.08248	0.08248	0.12008	0.08248	17714.1	21.83	23061.4	30471.5	4924.54	172.39	35.65	1212.67	9	-0.7	607.34	106.4		1352900	2	F2:32459	MSB60102A.raw	O95602|RPA1_HUMAN
VYSHLPDLL	-0.03015	-0.03015	-0.03015	-0.03015	0.02355	-0.03015	18145.6	66.73	29506.9	24119.7	13355	758.2	14.89	1055.57	9	2.1	528.791	89.24		686760	4	F4:24429	MSB66431A.raw	O75509|TNR21_HUMAN
VYSHLPDLL	-0.03015	-0.03015	-0.03015	-0.03015	0.02355	-0.03015	18145.6	66.73	29506.9	24119.7	13355	758.2	23.77	1055.57	9	-0.4	528.79	84.29		1140000	2	F2:24652	MSB60102A.raw	O75509|TNR21_HUMAN
VYSIVPQSW	-0.08444	-0.08444	-0.08444	-0.08444	-0.03074	-0.08444	32568.4	36.41	32735.9	25480.9	26141.3	2847.09	34.27	1077.55	9	-0.9	539.782	103.61		2536900	4	F4:28866	MSB66431A.raw	Q71RC2|LARP4_HUMAN
VYSIVPQSW	-0.08444	-0.08444	-0.08444	-0.08444	-0.03074	-0.08444	32568.4	36.41	32735.9	25480.9	26141.3	2847.09	34.27	1077.55	9	-0.9	539.782	103.61		4562700	4	F4:28866	MSB66431A.raw	Q71RC2|LARP4_HUMAN
VYSRTFTWL	0.30856	0.30856	0.30856	0.30856	0.36226	0.30856	12124.1	34.67	19750	26158.9	6777.95	275.05	20.15	1171.6	9	0.6	586.809	96.57		498810	2	F2:26656	MSB66429A.raw	O00159|MYO1C_HUMAN
VYTSKSDVWSF	-0.37423	-0.37423	-0.37423	-0.37423	-0.38683	-0.37423	18600.8	56	34335.8	33850.3	32208.2	4531.58	50.56	1317.62	11	-0.9	659.819	81.49		180110	4	F4:22409	MSB66431A.raw	P30530|UFO_HUMAN
YFLKGVLVF	-0.13398	-0.13398	-0.13398	-0.13398	-0.13038	-0.13398	7297.57	51.36	24042.6	23336.8	15877.4	1101	34.68	1084.63	9	-0.1	543.323	107.18		2163900	2	F2:32793	MSB60102A.raw	P49591|SYSC_HUMAN
YFLLSHSLL	-0.29151	-0.29151	-0.29151	-0.29151	-0.28791	-0.29151	2634.51	217.32	10616.7	18927	2331.44	374.27	33.83	1091.6	9	0	546.808	104.32		4449400	2	F2:31521	MSB60102A.raw	P27695|APEX1_HUMAN
YYEHVKARF	-0.03449	-0.03449	-0.03449	-0.03449	-0.06699	-0.03449	23872.8	61.95	24521	32402.9	20585	238.79	38.95	1211.61	9	0.2	606.812	28.88		2505400	1	F1:7830	MSB60101A.raw	Q9BV36|MELPH_HUMAN
YYIQNGIQSF	-0.1158	-0.1158	-0.1158	-0.1158	-0.159	-0.1158	7513.82	8.11	13127.6	26654.9	9219.93	72.98	14.78	1231.59	10	-0.9	616.8	89.03		271280	4	F4:24389	MSB66431A.raw	P78527|PRKDC_HUMAN
YYLSKIEEL	-0.11179	-0.11179	-0.11179	-0.11179	-0.10819	-0.11179	1474.63	26.8	20496.6	24162.6	3393.71	30.83	35.54	1156.6	9	-1	579.308	85.2		164960	4	F4:23366	MSB66431A.raw	P62195|PRS8_HUMAN
YYNPHLLLNTL	0.00342	0.00342	0.00342	0.00342	0.00552	0.00342	11903.5	143.36	1029.01	7159.45	9656.83	151.68	33.86	1359.72	11	-0.3	680.866	94.84		613980	2	F2:28257	MSB60102A.raw	O95373|IPO7_HUMAN
YYPSTPGRYSI	-0.16113	-0.16113	-0.16113	-0.16113	-0.15753	-0.16113	13336.2	93.09	1283.14	8423.84	5313.5	1697.15	39.87	1302.62	11	-0.8	652.319	60.94		778080	4	F4:16645	MSB66431A.raw	O75369|FLNB_HUMAN
APKRPPSAF	-0.15592	-0.15592	-0.15592	-0.15592	-0.08592	-0.15592	36423.3	31993.2	11.3	22941.7	21342.5	14180.8	29.07	969.54	9	0.5	485.777	19.92	0	1785200	2	F2:5119	MSB60102A.raw	B2RPK0|P09429|P26583
YPFKPPKVAF	-0.3459	-0.3459	-0.3459	-0.3459	-0.3839	-0.3459	23107.6	3105.28	44.86	3928.21	15279.3	1566.81	38.42	1192.66	10	0.4	398.562	74.7	0	1810600	2	F2:21630	MSB60102A.raw	P61077|P62837|Q9Y2X8
APRPPPKPM	-0.20408	-0.20408	-0.20408	-0.20408	-0.22088	-0.20408	33165.5	43078.5	5.15	20233.9	15637.9	15312.1	26.52	989.548	9	-0.2	495.781	16.12	0	2275600	2	F2:4072	MSB60102A.raw	P62854|Q5JNZ5
RPTDKPLRL	-0.16464	-0.16464	-0.16464	-0.16464	-0.17724	-0.16464	28587.4	31859.9	68.91	7556.38	17932.6	13843	14.8	1094.66	9	0.5	548.336	22.61	0	108550	2	F2:5939	MSB60102A.raw	P68104|Q5VTE0|Q05639
KPSEERVREI	0.33599	0.33599	0.33599	0.33599	0.38969	0.33599	30276.9	38183.2	188.77	9306.53	26071.6	31970.3	28.97	1241.67	10	1.6	621.845	16.24	0	87933	2	F2:4088	MSB60102A.raw	Q7LG56|P31350
APHEILIQI	0.27505	0.27505	0.27505	0.27505	0.26455	0.27505	9954.4	31028.4	461.38	1234.8	30953.3	23571.2	35.87	1032.6	9	-0.5	517.305	79.52		11787000	2	F2:23163	MSB60102A.raw	Q92503|S14L1_HUMAN
APRAPRALAAA	0.17931	0.17931	0.17931	0.17931	0.16251	0.17931	13630.9	41564.4	21.38	21255.9	23864.8	31321.2	22.44	1063.62	11	0	532.82	23.66		352270	2	F2:6267	MSB60102A.raw	P53007|TXTP_HUMAN
APRLPITGL	0.17268	0.17268	0.17268	0.17268	0.15588	0.17268	24201.5	39572.8	5.69	13985.4	16601.8	21520.1	25.49	936.576	9	-1.1	469.295	76.37		1035900	2	F2:22226	MSB60102A.raw	Q8TF50|ZN526_HUMAN
APRPARPPP	0.07662	0.07662	0.07662	0.07662	0.05982	0.07662	37722.4	44212.7	40.98	17488.8	38011.7	35865.3	19.21	957.551	9	-0.3	479.783	12.29		145400	1	F1:2894	MSB60101A.raw	A6NGR9|MROH6_HUMAN
GLPAVPAVPL	0.13036	0.13036	0.13036	0.13036	0.13396	0.13036	950.3	22283.8	91.5	12167.3	1670.46	21268.8	16.82	932.569	10	4.5	467.294	74.06		13877000	2	F2:20523	MSB66429A.raw	Q8N446|ZN843_HUMAN
GPKGVGAIYI	0.18429	0.18429	0.18429	0.18429	0.25429	0.18429	28056	39164.3	464.11	9459.31	39445.4	35421	15.25	973.56	10	7.9	487.791	86.8		3380300	2	F2:24059	MSB66429A.raw	Q9Y697|NFS1_HUMAN
GPRLPWTRL	0.26635	0.26635	0.26635	0.26635	0.24955	0.26635	30314.6	35288.3	8.89	15196.5	24897.1	26026.8	23.07	1094.63	9	0.6	548.325	71.38		375030	2	F2:20663	MSB60102A.raw	Q6NUQ4|TM214_HUMAN
GPRPSPWARL	0.10551	0.10551	0.10551	0.10551	0.08871	0.10551	24735.5	27580.8	15.71	14963.9	18682.3	12116.1	19.01	1135.62	10	-0.4	379.549	51.69		360020	2	F2:14600	MSB60102A.raw	P16144|ITB4_HUMAN
IPRAALLPLL	0.05719	0.05719	0.05719	0.05719	0.04039	0.05719	8627.04	20012	5.39	2427.57	16443.4	5577.59	18.41	1075.71	10	0.1	538.863	104.78		2470400	2	F2:31731	MSB60102A.raw	Q92743|HTRA1_HUMAN
LPHVPLGVI	0.08352	0.08352	0.08352	0.08352	0.07302	0.08352	21923.4	30712.8	43.18	514.85	18644.5	20219.5	20.35	943.585	9	-1.1	472.8	87.39		1930900	2	F2:25645	MSB60102A.raw	Q9Y679|AUP1_HUMAN
LPQGIVREL	0.26714	0.26714	0.26714	0.26714	0.30474	0.26714	19385.9	32933.4	36.18	2747.52	16356.6	9871.17	25.47	1023.61	9	-2.6	512.81	70.46		418620	2	F2:20452	MSB60102A.raw	P63272|SPT4H_HUMAN
LPRGSIPRSL	-0.04402	-0.04402	-0.04402	-0.04402	-0.06082	-0.04402	28937.2	36068.4	6.64	8150.03	19913.5	8498.54	22.79	1094.66	10	-0.5	548.335	46.16		289530	2	F2:12951	MSB60102A.raw	Q14566|MCM6_HUMAN
LPSALALSLL	-0.14357	-0.14357	-0.14357	-0.14357	-0.08987	-0.14357	2313.28	18289.3	67.44	975.77	14872.5	23272.2	15.58	996.622	10	-0.5	499.318	112.15		2606600	2	F2:34832	MSB60102A.raw	Q9Y639|NPTN_HUMAN
MPKLATQSNEI	-0.22075	-0.22075	-0.22075	-0.22075	-0.15075	-0.22075	9183.1	31788.9	245.59	2951.44	26623.2	30918.8	13.46	1230.63	11	1.3	411.217	65.08		122730	2	F2:18794	MSB60102A.raw	P04792|HSPB1_HUMAN
QPRRPRNLAA	0.11589	0.11589	0.11589	0.11589	0.09909	0.11589	39580.1	42433.2	22.77	18770.8	37601.8	22051.2	17.46	1177.68	10	-1	589.846	12.91		219020	2	F2:3084	MSB60102A.raw	Q00325|MPCP_HUMAN
QPYGGFLDI	0.1797	0.1797	0.1797	0.1797	0.1809	0.1797	9679.63	23575.8	213.93	561.7	22653.1	21106.7	13.73	1008.49	9	-2.7	505.252	106.3		6379100	2	F2:32381	MSB60102A.raw	O14976|GAK_HUMAN
RPADVIFATV	0.37072	0.37072	0.37072	0.37072	0.35802	0.37072	621.55	21155.8	63.03	654.7	15992.1	22487	24.47	1087.6	10	-1.5	544.808	81.24		496060	4	F4:22309	MSB66431A.raw	P33993|MCM7_HUMAN
RPDGEKKAYVRL	-0.1815	-0.1815	-0.1815	-0.1815	-0.1887	-0.1815	29226.6	31472.4	354.98	21586.8	35334.5	33216.8	31.35	1430.8	12	2	477.941	19.74		37410	2	F2:5142	MSB60102A.raw	P62750|RL23A_HUMAN
RPKDPNNLL	-0.07651	-0.07651	-0.07651	-0.07651	-0.00651	-0.07651	26816.6	30141	13.6	7940.69	11001.3	11504.5	28.8	1065.59	9	-0.6	533.803	27.59		1159200	2	F2:7526	MSB60102A.raw	O00232|PSD12_HUMAN
RPKPSSSPVIF	-0.4623	-0.4623	-0.4623	-0.4623	-0.3923	-0.4623	37075	26982.8	17.77	16603.6	25680.5	25930.3	18.84	1213.68	11	2.1	607.85	43.28		175450	2	F2:12111	MSB60102A.raw	Q15366|PCBP2_HUMAN
RPRLTSNEKL	-0.16525	-0.16525	-0.16525	-0.16525	-0.18205	-0.16525	26619.1	32815.3	3.38	12131.4	23087.4	17126.5	18.72	1212.69	10	1.3	607.355	19.99		654220	2	F2:5169	MSB60102A.raw	Q9Y296|TPPC4_HUMAN
RPRPGRPTA	0.10068	0.10068	0.10068	0.10068	0.08388	0.10068	32447.1	39925.5	5.03	8138.93	24944.9	20076.2	13.32	1006.58	9	0.8	336.534	10.91		519890	2	F2:2473	MSB60102A.raw	Q9BRG2|SH23A_HUMAN
RPYGVGLLI	0.08916	0.08916	0.08916	0.08916	0.09036	0.08916	7161.16	8597.32	35.86	220.95	13876.9	13207.7	26.17	986.591	9	-0.8	494.303	92.47		1038500	1	F1:25789	MSB66428A.raw	P25786|PSA1_HUMAN
RPYGVGLLI	0.08916	0.08916	0.08916	0.08916	0.09036	0.08916	7161.16	8597.32	35.86	220.95	13876.9	13207.7	18.22	986.591	9	-0.5	494.303	84.79		15382000	2	F2:24829	MSB60102A.raw	P25786|PSA1_HUMAN
FPFESGKPFKI	-0.23699	-0.23699	-0.23699	-0.23699	-0.27499	-0.23699	13172.3	24872.4	1015.17	367.7	28638.8	23387.8	30.1	1295.69	11	2.4	648.855	81.04		575100	2	F2:23671	MSB60102A.raw	P17931|LEG3_HUMAN
IPFEFPLHL	0.25185	0.25185	0.25185	0.25185	0.21385	0.25185	4297.22	15339.3	578.09	250.52	7912.99	4125.9	22.03	1111.61	9	-0.5	556.81	109.73		1495500	2	F2:33890	MSB60102A.raw	O14972|VP26C_HUMAN
LPFEPVPVI	0.18157	0.18157	0.18157	0.18157	0.14357	0.18157	10947.1	26803.5	711.04	231.35	13138.6	15494.6	27.23	1009.58	9	-0.2	505.8	108.96		7758800	2	F2:33542	MSB60102A.raw	Q9P2J5|SYLC_HUMAN
LPSELIVHI	0.21527	0.21527	0.21527	0.21527	0.26897	0.21527	6742.4	25723.3	1695.5	198.39	28629.5	21447.6	30.15	1019.6	9	-0.1	510.808	88.74		2580600	2	F2:26100	MSB60102A.raw	Q7Z6M2|FBX33_HUMAN
LPSSVLHII	-0.08535	-0.08535	-0.08535	-0.08535	-0.03165	-0.08535	8017.1	16064.9	210.2	127.78	22566.2	16571.4	24.76	977.591	9	-0.4	489.803	87.63		1666300	2	F2:25803	MSB60102A.raw	Q9NSG2|CA112_HUMAN
LPWISILTV	0.18332	0.18332	0.18332	0.18332	0.11142	0.18332	4487.86	27034.5	674.19	110.73	24800.1	24299.9	20.17	1040.63	9	-3.4	521.319	115.92		1184900	2	F2:36319	MSB60102A.raw	O75845|SC5D_HUMAN
VMAPRTLLL	0.07264	0.07264	0.07264	0.07264	0.05994	0.07264	205.86	297.7	2079.92	9560.66	169.5	232.91	22.62	1012.61	9	1.2	507.313	76.32		146120	2	F2:22171	MSB60102A.raw	P04439|HLAA_HUMAN
YGLLPSHASYL	-0.26011	-0.26011	-0.26011	-0.26011	-0.25651	-0.26011	1208.14	12808.6	15619.3	25568.2	112.92	3598.99	33.31	1219.62	11	-2.7	610.817	81.98		4688600	2	F2:23951	MSB60102A.raw	Q86U90|YRDC_HUMAN
FFKDRHWLF	0.21363	0.21363	0.21363	0.21363	0.28363	0.21363	12890.2	63.88	27818.7	24946.8	14244.1	58.59	35.9	1294.66	9	-2.1	648.336	82.49	0	576010	4	F4:22682	MSB66431A.raw	Q6P1Q9|Q96IZ6
HYKPTPLYF	-0.06532	-0.06532	-0.06532	-0.06532	0.00468	-0.06532	27096	40.95	23990.9	28751.8	16758.2	33.11	20.07	1164.6	9	3.4	583.308	60.14		160330	4	F4:16466	MSB66431A.raw	Q9NTJ3|SMC4_HUMAN
IYNQVNVVL	-0.02559	-0.02559	-0.02559	-0.02559	-0.02349	-0.02559	11490.7	136.52	17504	23019.8	6130.65	85.94	35.24	1060.59	9	-0.5	531.303	85.65		957700	4	F4:23469	MSB66431A.raw	Q9NUQ9|CYRIB_HUMAN
IYREDRPSL	0.08185	0.08185	0.08185	0.08185	0.06505	0.08185	24190.5	2750.59	4224.51	31875	6017.15	304.44	14.71	1147.6	9	0	574.807	89.58		415030	4	F4:24550	MSB66431A.raw	A4D0V7|CPED1_HUMAN
KYFDEHYEY	0.24365	0.24365	0.24365	0.24365	0.20565	0.24365	16518.3	462.14	37809.4	30052.4	27388.4	73.79	34.75	1292.53	9	1.6	647.276	49.59		210850	2	F2:14052	MSB60102A.raw	P33552|CKS2_HUMAN
LYDELRNLL	0.13393	0.13393	0.13393	0.13393	0.12673	0.13393	5365.67	782.15	13691.1	22921.6	5634.85	200.4	16.66	1147.62	9	-0.2	574.819	98.45		2973200	4	F4:27097	MSB66431A.raw	Q66K74|MAP1S_HUMAN
LYENTFQEL	0.13473	0.13473	0.13473	0.13473	0.10223	0.13473	14702.9	280.03	20799.3	28204.2	5370.61	144.96	21.74	1155.54	9	-1.7	578.779	88.86		178390	4	F4:24335	MSB66431A.raw	P28290|ITPI2_HUMAN
LYPEGLAQL	0.08505	0.08505	0.08505	0.08505	0.08865	0.08505	5641.01	211.05	22803.8	33310.8	297.98	180.04	28.4	1002.54	9	0.2	502.277	92.78		39362000	2	F2:27636	MSB60102A.raw	P61421|VA0D1_HUMAN
NYRPLPSLEL	-0.12255	-0.12255	-0.12255	-0.12255	-0.13935	-0.12255	24197.3	1347.22	10096.6	30824.3	4998.63	441.24	25.08	1200.65	10	-1.9	601.331	92.21		53445	2	F2:25447	MSB66429A.raw	Q14241|ELOA1_HUMAN
QYNTYPIKL	0.00924	0.00924	0.00924	0.00924	0.01134	0.00924	26124.9	526.91	32192.9	30454.7	18049.4	411.96	14.2	1138.6	9	0.8	570.309	70.97		356570	2	F2:20554	MSB60102A.raw	P61619|S61A1_HUMAN
YYEHEFVEL	0.36609	0.36609	0.36609	0.36609	0.33359	0.36609	7682.43	366.82	23429.6	29575.9	4227.4	118.43	20.78	1227.54	9	-1.9	614.779	79.5		772460	4	F4:21877	MSB66431A.raw	O43861|ATP9B_HUMAN
YYPNPPLVL	-0.01659	-0.01659	-0.01659	-0.01659	-0.01299	-0.01659	14149.5	168.59	15153.9	31232.9	167.94	20.64	27.46	1074.58	9	0.4	538.295	98.74		8133100	1	F1:30096	MSB60101A.raw	Q5TFE4|NT5D1_HUMAN

## Sheet: No Treatment-Exclusive Peptides
Peptide	HLA-A*02:06 Immunogenicity Score	HLA-A*24:02 Immunogenicity Score	HLA-B*07:02 Immunogenicity Score	HLA-B*59:01 Immunogenicity Score	HLA-C*01:02 Immunogenicity Score	HLA-C*07:02 Immunogenicity Score	HLA-A*02:06 Binding Affinity (nM)	HLA-A*24:02 Binding Affinity (nM)	HLA-B*07:02 Binding Affinity (nM)	HLA-B*59:01 Binding Affinity (nM)	HLA-C*01:02 Binding Affinity (nM)	HLA-C*07:02 Binding Affinity (nM)	-10lgP	Mass	Length	ppm	m/z	RT	No Treatment Area	Gemcitabine Area	Fraction	Scan	Source File	Source Protein (Uniprot Accession)
FAFQAEIAQL	0.14766	0.14766	0.14766	0.14766	0.10966	0.14766	253.27	7939.83	12245.1	9240.81	4968.7	4264.84	16.12	1136.59	10	-1.1	569.3	108.86	913910	0	1	F1:34067	MSB60101A.raw	P07900|P08238|Q14568|Q58FF8|Q58FF7
FVHDLVLYL	0.04936	0.04936	0.04936	0.04936	0.03886	0.04936	5.92	14780.3	12400	6373.67	3135.19	365.22	34.38	1117.62	9	1.3	559.817	106.01	4602800	0	1	F1:30873	MSB66428A.raw	Q00610|P53675
IQDGYLSLL	-0.11884	-0.11884	-0.11884	-0.11884	-0.12604	-0.11884	36.4	10874.5	21257.5	22688.9	4359.03	2836.82	17.34	1020.55	9	-1.2	511.281	108.23	331620	0	1	F1:31910	MSB66428A.raw	P63241|Q6IS14|Q9GZV4
YALPHAILRL	0.201	0.201	0.201	0.201	0.2046	0.201	182.45	5752.88	10676.6	8336.71	262.08	2439.1	39.72	1165.7	10	-0.9	389.573	89.78	2299300	0	1	F1:24980	MSB66428A.raw	P60709|P63261|Q562R1
YGLDKIEFL	0.0869	0.0869	0.0869	0.0869	0.0905	0.0869	218.77	13333.3	24839.6	15943.4	5344.52	2839.12	25.01	1096.58	9	-7.6	549.293	101.79	1812800	0	1	F1:29029	MSB66428A.raw	O60684|O15131|P52294
ALLNIKVKL	-0.17467	-0.17467	-0.17467	-0.17467	-0.17107	-0.17467	359.48	22539.2	20574.1	30446.1	20527	17715.7	30.14	1010.69	9	0.1	506.35	82.71	169330	0	3	F3:22853	MSB66430A.raw	P05783
ALLNIKVKL	-0.17467	-0.17467	-0.17467	-0.17467	-0.17107	-0.17467	359.48	22539.2	20574.1	30446.1	20527	17715.7	28.68	1010.69	9	-0.7	506.349	77.62	557810	0	1	F1:22741	MSB60101A.raw	P05783
LDMDSIIAEV	0.15062	0.15062	0.15062	0.15062	0.20762	0.15062	78.65	26352.1	23669.9	13991.8	21439.5	24533.7	21.52	1104.54	10	-1.1	553.275	110.19	221640	0	3	F3:31380	MSB66430A.raw	P05787
WLKGVTFNV	0.13586	0.13586	0.13586	0.13586	0.20586	0.13586	36.16	19939.2	19592.5	11467.6	24953	15309.4	27.95	1062.59	9	-2	532.299	87.25	490810		1	F1:25859	MSB60101A.raw	O00299
TVIKDLLGL	-0.1522	-0.1522	-0.1522	-0.1522	-0.1954	-0.1522	38.46	21801.4	12866.2	22026.4	12787.8	15439.7	21.22	970.606	9	-1.1	486.31	104.23	1096300		1	F1:30138	MSB66428A.raw	O14980
ALLDGSNVVFKL	-0.06382	-0.06382	-0.06382	-0.06382	-0.06022	-0.06382	177.07	27078.4	30619.9	33614.6	27898	29994.9	33.04	1274.72	12	0.6	638.369	104.85	4652600		1	F1:32467	MSB60101A.raw	O15212
LLAEAGVRL	0.24853	0.24853	0.24853	0.24853	0.23583	0.24853	87.11	18020.3	8631.8	20749.8	1977.52	6808.23	41.23	940.571	9	0.6	471.293	74.09	290560		1	F1:20526	MSB66428A.raw	O43175
SLVELLNQI	0.01977	0.01977	0.01977	0.01977	0.00637	0.01977	10.99	15373.5	24290.5	12811.6	11962.4	12515.6	25.21	1027.59	9	-1.6	514.802	111.65	498860		3	F3:31949	MSB66430A.raw	O75153
VVLGQFLVL	0.04266	0.04266	0.04266	0.04266	0.04626	0.04266	156.95	6066.31	5179.54	13171.6	6737.96	5163.76	27.69	986.616	9	-0.7	494.315	113.48	1746300		1	F1:35793	MSB60101A.raw	O75531
FLTPPLLSV	-0.12582	-0.12582	-0.12582	-0.12582	-0.13842	-0.12582	4.99	18810.2	11977.4	6863.93	1552.79	1501.8	24.63	985.585	9	-0.5	493.799	110	878530		1	F1:32597	MSB66428A.raw	O95782
YQKMYGISL	-0.20274	-0.20274	-0.20274	-0.20274	-0.13274	-0.20274	170.91	11098.2	3762.93	19061.6	4682.15	871.14	21.19	1101.55	9	-1.1	551.783	82.43	756810		1	F1:22880	MSB66428A.raw	P04083
FLASPEYVNL	-0.03949	-0.03949	-0.03949	-0.03949	-0.05219	-0.03949	76.07	15054.5	14803.2	15127.2	3769.08	8200.36	42.98	1151.59	10	-1.7	576.799	100.33	580530		1	F1:28540	MSB66428A.raw	P09211
FLASPEYVNL	-0.03949	-0.03949	-0.03949	-0.03949	-0.05219	-0.03949	76.07	15054.5	14803.2	15127.2	3769.08	8200.36	33.87	1151.59	10	2.6	576.802	96.91	6682600		1	F1:29512	MSB60101A.raw	P09211
ILITGGIVAT	0.33124	0.33124	0.33124	0.33124	0.28804	0.33124	333.51	42042.4	29575.3	37219.3	37209.2	37223.3	22.25	956.591	10	-0.3	479.303	87.11	134810		3	F3:24057	MSB66430A.raw	P13498
ILTDITKGV	0.03886	0.03886	0.03886	0.03886	0.02626	0.03886	71.32	35174.7	30559.6	18388.1	16926.8	16354.7	32.25	958.57	9	-1.2	480.292	61.22	721720		2	F2:17611	MSB60102A.raw	P13639
GFLSELTQQL	-0.21227	-0.21227	-0.21227	-0.21227	-0.20867	-0.21227	241.48	10357	24592.5	28442.7	16090	11417	41.46	1134.59	10	-0.6	568.303	110.4	2118000		1	F1:32710	MSB66428A.raw	P14174
GFLSELTQQL	-0.21227	-0.21227	-0.21227	-0.21227	-0.20867	-0.21227	241.48	10357	24592.5	28442.7	16090	11417	41.46	1134.59	10	-0.6	568.303	110.4	2856800		1	F1:32710	MSB66428A.raw	P14174
GFLSELTQQL	-0.21227	-0.21227	-0.21227	-0.21227	-0.20867	-0.21227	241.48	10357	24592.5	28442.7	16090	11417	32.42	1134.59	10	1.1	568.304	110.67	2555000		1	F1:34753	MSB60101A.raw	P14174
FQITEETQI	0.23909	0.23909	0.23909	0.23909	0.19589	0.23909	49.52	21021.2	31881.6	12486.9	16409.8	12361.9	37.88	1107.54	9	-1.1	554.779	81.71	183670		3	F3:22613	MSB66430A.raw	P16144
TVPDLLLPL	-0.01836	-0.01836	-0.01836	-0.01836	-0.01476	-0.01836	51.39	9648.89	9698.93	22301.9	73.03	2302.81	12.71	979.595	9	0.5	490.805	112.29	6435300		1	F1:35332	MSB60101A.raw	P19438
YSIAGNMDL	-0.02576	-0.02576	-0.02576	-0.02576	-0.06896	-0.02576	296.17	17403.7	8410.54	17404.3	638.45	4048.12	42.02	982.443	9	0	492.229	87.39	204900		3	F3:24145	MSB66430A.raw	P23229
YSIAGNMDL	-0.02576	-0.02576	-0.02576	-0.02576	-0.06896	-0.02576	296.17	17403.7	8410.54	17404.3	638.45	4048.12	42.02	982.443	9	0	492.229	87.39	1508700		3	F3:24145	MSB66430A.raw	P23229
YTLSKTEFL	-0.19063	-0.19063	-0.19063	-0.19063	-0.18703	-0.19063	31.85	5273.64	13582	17678.5	1383.44	1924.39	27.33	1100.58	9	-1.1	551.294	80.29	511410		1	F1:22211	MSB66428A.raw	P31949
WQIDREMLNL	0.03498	0.03498	0.03498	0.03498	-0.00822	0.03498	30.31	16156.8	18700.7	19480.1	17665.5	8532.08	45.28	1316.65	10	-1.1	659.334	104.78	17468000		3	F3:29206	MSB66430A.raw	P34932
WQIDREMLNL	0.03498	0.03498	0.03498	0.03498	-0.00822	0.03498	30.31	16156.8	18700.7	19480.1	17665.5	8532.08	45.28	1316.65	10	-1.1	659.334	104.78	26011000		3	F3:29206	MSB66430A.raw	P34932
GLLGTLVQL	0.02502	0.02502	0.02502	0.02502	0.02862	0.02502	25.69	25487	24445	30554	21774.3	17254.3	23.23	912.564	9	-1.2	457.289	111.78	829570		3	F3:31999	MSB66430A.raw	P35222
GLLGTLVQL	0.02502	0.02502	0.02502	0.02502	0.02862	0.02502	25.69	25487	24445	30554	21774.3	17254.3	22.55	912.564	9	0.8	457.29	111.43	1819400		1	F1:35065	MSB60101A.raw	P35222
QQDPQQYNV	-0.2327	-0.2327	-0.2327	-0.2327	-0.2399	-0.2327	145.59	24329.4	32826	19076.7	29476.6	22813.5	20.77	1118.5	9	0.7	560.257	32.8	187630		1	F1:9018	MSB60101A.raw	P35869
SVVTSIFGV	0.13524	0.13524	0.13524	0.13524	0.12184	0.13524	3.49	24007.2	19652.8	12754.5	19160.7	16007.5	18.33	907.501	9	-1.1	454.757	107.88	529250		1	F1:31754	MSB66428A.raw	P41252
ILFSEGLIKA	-0.02209	-0.02209	-0.02209	-0.02209	-0.06009	-0.02209	62.06	31984.2	32615	21751.2	34758.1	27411.2	36.39	1089.64	10	0.2	545.829	93.58	71597		1	F1:26165	MSB66428A.raw	P42285
ILFSEGLIKA	-0.02209	-0.02209	-0.02209	-0.02209	-0.06009	-0.02209	62.06	31984.2	32615	21751.2	34758.1	27411.2	36.39	1089.64	10	0.2	545.829	93.58	777370		1	F1:26165	MSB66428A.raw	P42285
VVLKMVTEI	-0.26148	-0.26148	-0.26148	-0.26148	-0.25788	-0.26148	142.24	7275.89	15034.5	8716.46	11397.2	17563.4	34.17	1030.61	9	-1.4	516.311	86.98	779500		1	F1:24188	MSB66428A.raw	P49915
SLPKGVVEV	-0.0554	-0.0554	-0.0554	-0.0554	-0.0518	-0.0554	16.4	12271.9	23087.6	27404.4	127.07	3685.33	27.53	926.544	9	-0.6	464.279	60.88	2194400		1	F1:16655	MSB66428A.raw	P50454
NLASFIEQV	0.10233	0.10233	0.10233	0.10233	0.08963	0.10233	11.19	23912.4	29858.9	10272.8	13242.9	7447.45	36.47	1019.53	9	-0.6	510.771	108.88	1057800		3	F3:30891	MSB66430A.raw	P61457
NLASFIEQV	0.10233	0.10233	0.10233	0.10233	0.08963	0.10233	11.19	23912.4	29858.9	10272.8	13242.9	7447.45	36.47	1019.53	9	-0.6	510.771	108.88	1766600		3	F3:30891	MSB66430A.raw	P61457
FIEENDEVL	0.25645	0.25645	0.25645	0.25645	0.22395	0.25645	472.33	31081.2	17798.9	22900.8	3073.99	8489.45	39.46	1106.51	9	0.6	554.264	78.69	584000		1	F1:21810	MSB66428A.raw	P62266
FLRGDSVIVV	0.0867	0.0867	0.0867	0.0867	0.0699	0.0867	92.91	34102.5	13097.6	16778.9	18105.6	5636.43	19.38	1103.63	10	-1.1	552.824	78.34	820150		4	F4:21570	MSB66431A.raw	P62316
MQQYEIWREL	0.49647	0.49647	0.49647	0.49647	0.53407	0.49647	75.17	6062.57	14176.5	13504.7	15325.7	6332.08	48.18	1394.67	10	-2.4	698.338	99.92	5365100		1	F1:28364	MSB66428A.raw	P68402
IVIGIIKTV	0.17286	0.17286	0.17286	0.17286	0.12966	0.17286	21.56	23112.6	21526.7	9364	14215.5	10391.2	21.7	954.648	9	0	478.331	81.79	1212300		2	F2:23856	MSB60102A.raw	Q02153
FLAEDALNTV	0.17993	0.17993	0.17993	0.17993	0.16723	0.17993	4.19	27273	21790.5	11509.8	10035.1	11704.3	25.2	1091.55	10	-1.6	546.781	94.84	623950		3	F3:26182	MSB66430A.raw	Q08345
VAVAGLLTV	0.08865	0.08865	0.08865	0.08865	0.07525	0.08865	34.58	22353.4	13139.2	4475.11	7392.22	10926.9	20.62	841.527	9	0.7	421.771	102.96	326480		3	F3:28579	MSB66430A.raw	Q13200
VVINYTEQL	0.08645	0.08645	0.08645	0.08645	0.04325	0.08645	98.15	8916.39	13034	17930.5	2320.42	2373.13	35.88	1077.57	9	3.8	539.795	80.65	251730		3	F3:22306	MSB66430A.raw	Q13233
TIITTLENL	0.19034	0.19034	0.19034	0.19034	0.14714	0.19034	111.88	19263.8	19930.8	24132	9325.68	14308.4	16.91	1016.58	9	-0.2	509.295	109.1	531280		1	F1:32252	MSB66428A.raw	Q14204
TIITTLENL	0.19034	0.19034	0.19034	0.19034	0.14714	0.19034	111.88	19263.8	19930.8	24132	9325.68	14308.4	29.24	1016.58	9	-1.9	509.294	109.5	357870		1	F1:34295	MSB60101A.raw	Q14204
TLISELVQA	-0.06905	-0.06905	-0.06905	-0.06905	-0.11225	-0.06905	21.63	36776.2	30798	23377.9	29379.8	21752.8	27.58	972.549	9	-1.8	487.281	105.87	1598000		1	F1:30822	MSB66428A.raw	Q14999
AQYLINVRL	0.17623	0.17623	0.17623	0.17623	0.17743	0.17623	137.95	17409	27892.3	23003.1	19100	10929.4	29.1	1088.63	9	0	545.324	85.71	71608		1	F1:25416	MSB60101A.raw	Q15366
GVPTKVFNV	-0.04066	-0.04066	-0.04066	-0.04066	-0.03706	-0.04066	65.13	16029.3	32294.4	30495.5	3160.15	11150	25.39	959.544	9	-1.5	480.779	61.95	1520200		1	F1:17967	MSB60101A.raw	Q16875
AIDPHLLLSV	-0.09972	-0.09972	-0.09972	-0.09972	-0.10692	-0.09972	62.17	25678.2	20009.7	25219.2	12418.6	22574.1	30.44	1076.62	10	-0.9	539.318	100.72	1098300		1	F1:28680	MSB66428A.raw	Q29RF7
TVLQAIQSL	-0.1512	-0.1512	-0.1512	-0.1512	-0.1476	-0.1512	328.36	15822.7	4417.72	19962.3	3804.19	7594.49	12.86	971.565	9	0	486.79	102.53	521000		1	F1:31466	MSB60101A.raw	Q2TAY7
SLAEVLQQL	-0.02223	-0.02223	-0.02223	-0.02223	-0.03493	-0.02223	9.12	11976.1	9413.67	19998.6	1360.39	1719.81	27.35	999.56	9	-1.5	500.787	109.6	942100		3	F3:31164	MSB66430A.raw	Q6NUM9
SLAEVLQQL	-0.02223	-0.02223	-0.02223	-0.02223	-0.03493	-0.02223	9.12	11976.1	9413.67	19998.6	1360.39	1719.81	27.35	999.56	9	-1.5	500.787	109.6	1200200		3	F3:31164	MSB66430A.raw	Q6NUM9
FLNSVGDLL	-0.08423	-0.08423	-0.08423	-0.08423	-0.08213	-0.08423	32.1	10458.8	13593.5	11121.8	2965.27	2784.27	24.7	976.523	9	-0.7	489.268	107.53	4852000		1	F1:31608	MSB66428A.raw	Q6P4A8
LDLIPSLSPT	-0.19812	-0.19812	-0.19812	-0.19812	-0.19452	-0.19812	165.59	40206.4	25274.2	31005.3	36305.7	36596.7	20.17	1054.59	10	-1.8	528.302	106.24	1218000		1	F1:30976	MSB66428A.raw	Q6P4A8
FQIQFLNSVGDL	-0.05714	-0.05714	-0.05714	-0.05714	-0.10034	-0.05714	80.53	21543	28302.7	29932.3	25509	16298.8	51.15	1379.71	12	-1.2	690.861	111.73	2014100		3	F3:31964	MSB66430A.raw	Q6P4A8
FQIQFLNSVGDL	-0.05714	-0.05714	-0.05714	-0.05714	-0.10034	-0.05714	80.53	21543	28302.7	29932.3	25509	16298.8	51.15	1379.71	12	-1.2	690.861	111.73	2393800		3	F3:31964	MSB66430A.raw	Q6P4A8
AVFDKTLAEL	-0.0308	-0.0308	-0.0308	-0.0308	-0.0688	-0.0308	84.03	18428.5	4679.57	25356.3	6094.4	6611.22	38.77	1105.6	10	-0.2	553.808	88.24	615890		4	F4:24182	MSB66431A.raw	Q6VMQ6
SQFPLPLAV	0.0191	0.0191	0.0191	0.0191	-0.0189	0.0191	7.27	12956.8	15973.8	4955.87	6802.05	1577.41	16.57	970.549	9	0.2	486.282	108	458060		1	F1:31842	MSB66428A.raw	Q75T13
GQQTLTFEV	0.1845	0.1845	0.1845	0.1845	0.2221	0.1845	12.94	13815.3	28770.5	17972	32522	16049.3	16.17	1021.51	9	-1.3	511.761	86.64	89425		3	F3:23931	MSB66430A.raw	Q8IVF2
LQDAFHISL	0.20668	0.20668	0.20668	0.20668	0.19948	0.20668	37.45	12558.6	11963.9	16009.2	4200.91	3091.87	31.88	1042.54	9	-0.5	522.279	95.09	559890		1	F1:26615	MSB66428A.raw	Q8N5H3
NLWQDLPEI	0.01564	0.01564	0.01564	0.01564	-0.05626	0.01564	13.94	15597.5	24892.6	8472.74	14819	11123.5	23.36	1126.57	9	0.4	564.29	111.54	1253200		1	F1:35054	MSB60101A.raw	Q8N5V2
WIVEQLGQL	-0.04817	-0.04817	-0.04817	-0.04817	-0.06157	-0.04817	64.55	29699.4	6935.9	21384.4	9565.73	11816	28.41	1084.59	9	-0.6	543.303	108.4	2841000		1	F1:33844	MSB60101A.raw	Q8TAE6
LAAHIPLFL	0.22345	0.22345	0.22345	0.22345	0.21075	0.22345	254.36	12843.6	7990.51	4395.35	3644.72	2845.27	18.02	993.601	9	-0.8	497.807	104.77	1530900		2	F2:31757	MSB60102A.raw	Q92600
SVVPDVRSV	0.00972	0.00972	0.00972	0.00972	-0.00368	0.00972	42.46	32456.2	8881.54	14153.6	7763.98	7951.44	22	956.529	9	-0.9	479.271	57.28	162880		1	F1:15654	MSB66428A.raw	Q969G3
IVTEIISEI	0.28711	0.28711	0.28711	0.28711	0.27451	0.28711	41.72	15021.3	17972.8	7157.83	6253.38	7819.37	22.67	1015.58	9	-1.5	508.796	104.87	865150		1	F1:30396	MSB66428A.raw	Q9BPX3
TLIAILPSIF	0.12907	0.12907	0.12907	0.12907	0.08587	0.12907	216.42	5289.47	20961.5	22928.5	28092.8	19949.1	18.84	1086.67	10	-1.6	544.341	116.37	438750		1	F1:36920	MSB60101A.raw	Q9BVK2
YTLLHNPTLQV	-0.04086	-0.04086	-0.04086	-0.04086	-0.03726	-0.04086	221.72	26357.5	24835	16699.4	18463.6	18159.9	26.81	1297.7	11	1.7	649.86	86.82	442450		1	F1:24119	MSB66428A.raw	Q9BX79
WQVSWQPFL	0.01263	0.01263	0.01263	0.01263	-0.00077	0.01263	5.5	5820.69	16629.3	7892.3	10697.8	2513.11	26.31	1189.59	9	0.3	595.803	112.93	1698700		1	F1:35552	MSB60101A.raw	Q9BY44
YVQDFLNHL	0.10172	0.10172	0.10172	0.10172	0.13932	0.10172	9.54	6672.81	11163.8	14661	1265.45	727.84	38.88	1147.57	9	-1	574.79	95.17	549130		3	F3:26229	MSB66430A.raw	Q9H074
FTLDGDIKL	0.05892	0.05892	0.05892	0.05892	0.06252	0.05892	14.77	23418.5	21620.3	15551	4351.92	4623.3	27.99	1020.55	9	0	511.282	94.74	159450		3	F3:26127	MSB66430A.raw	Q9H2G2
LLLAQLSDA	-0.21413	-0.21413	-0.21413	-0.21413	-0.21053	-0.21413	261.8	40187.2	28351.1	27129.1	35095.6	34219.3	29.11	942.539	9	-1	472.276	91.67	1004500		2	F2:27105	MSB60102A.raw	Q9NQ34
SIAGIFKEV	0.1631	0.1631	0.1631	0.1631	0.1504	0.1631	9.89	23940.3	9580.54	13974.7	7226.07	8491.01	12.98	962.544	9	0.3	482.279	83.13	2095100		1	F1:24733	MSB60101A.raw	Q9NQQ7
FVDGSAIQV	-0.03833	-0.03833	-0.03833	-0.03833	-0.04553	-0.03833	11.45	31327	19863.6	14097.1	7008.62	8082.77	22.99	934.476	9	-0.7	468.245	74.39	965560		1	F1:20647	MSB66428A.raw	Q9NUQ6
NLSDQILQV	-0.09594	-0.09594	-0.09594	-0.09594	-0.04224	-0.09594	36.04	28667	30007.9	13804.7	15760.4	6636.16	15.12	1028.55	9	0	515.282	74.16	991400		1	F1:21599	MSB60101A.raw	Q9NY47
AAILGMHNL	-0.07674	-0.07674	-0.07674	-0.07674	-0.11994	-0.07674	395.01	22130.5	7894.77	21011.7	5727.17	12933.9	37.57	938.501	9	3	470.259	77	3492600		1	F1:21396	MSB66428A.raw	Q9NYL9
GVLKEGFLV	0.00112	0.00112	0.00112	0.00112	0.00472	0.00112	38.37	20924.1	29697.5	17014.2	36229.1	33287.7	32.4	960.564	9	1.7	481.29	86.4	122150		1	F1:23989	MSB66428A.raw	Q9NYT0
TQMNAELNYKV	-0.07392	-0.07392	-0.07392	-0.07392	-0.01692	-0.07392	93.05	24566.7	34695.4	19203.4	39583.5	31754.2	28.86	1309.63	11	-3.4	655.822	58.56	19581		3	F3:16030	MSB66430A.raw	Q9NZD2
KQALKYFNL	-0.11692	-0.11692	-0.11692	-0.11692	-0.12962	-0.11692	104.96	1629.01	20927.3	28199.4	13284.5	7283.37	22.44	1123.64	9	1.6	562.828	73.9	163070		1	F1:20513	MSB66428A.raw	Q9UBV2
YSLITSFSEL	0.0361	0.0361	0.0361	0.0361	0.0397	0.0361	54.32	8466.42	7753.66	13364.4	1754.58	6315.8	23.13	1158.58	10	0.3	580.298	110.85	152420		3	F3:31598	MSB66430A.raw	Q9UHY7
FLPQKIIYL	-0.09472	-0.09472	-0.09472	-0.09472	-0.09112	-0.09472	8.97	2783.25	16066.7	23147.4	18.66	108.19	32.34	1133.68	9	-2.3	567.848	98.94	760040		1	F1:27997	MSB66428A.raw	Q9UL46
TQLESSWEL	0.02576	0.02576	0.02576	0.02576	0.02936	0.02576	4.33	4407.88	20174	11881.8	10160.8	2627.19	30.92	1091.51	9	-1.4	546.763	94.98	813950		2	F2:26200	MSB66429A.raw	Q9ULT8
TQLESSWEL	0.02576	0.02576	0.02576	0.02576	0.02936	0.02576	4.33	4407.88	20174	11881.8	10160.8	2627.19	30.92	1091.51	9	-1.4	546.763	94.98	653570		2	F2:26200	MSB66429A.raw	Q9ULT8
YSLEKVFGI	0.04461	0.04461	0.04461	0.04461	0.04821	0.04461	4.88	2947.52	22840.9	5051.64	5975.11	4924.06	28.38	1054.57	9	2.9	528.294	103.98	252790		3	F3:28917	MSB66430A.raw	Q9UNF1
MALGLGPWLA	0.22272	0.22272	0.22272	0.22272	0.22632	0.22272	128.34	23514.9	19200.5	3001.68	33605.1	26531.1	26.5	1027.55	10	-0.3	514.783	111.96	1210100		3	F3:32055	MSB66430A.raw	Q9Y3C8
MALGLGPWLA	0.22272	0.22272	0.22272	0.22272	0.22632	0.22272	128.34	23514.9	19200.5	3001.68	33605.1	26531.1	26.5	1027.55	10	-0.3	514.783	111.96	1028400		3	F3:32055	MSB66430A.raw	Q9Y3C8
MVLEDVTEF	0.24887	0.24887	0.24887	0.24887	0.25247	0.24887	231.15	3784.65	13901.9	13028.6	13652.3	3626.7	30.17	1081.5	9	-1.6	541.756	104.41	695110		1	F1:30156	MSB66428A.raw	Q9Y4Y9
IQSLSLPVL	-0.22164	-0.22164	-0.22164	-0.22164	-0.16794	-0.22164	178.04	10663.2	17194.1	20179.7	6212.91	5536.58	23.87	968.591	9	-0.5	485.302	110.2	4743000		3	F3:31351	MSB66430A.raw	Q9Y5H8
PFIPASNLFF	-0.03801	-0.03801	-0.03801	-0.03801	-0.08121	-0.03801	10230.2	99.56	30922.5	30859.3	6392.45	8811.09	20.92	1151.6	10	1.9	576.809	113.98	401130	0	1	F1:35995	MSB60101A.raw	Q8IUR5|Q6ZXV5
SYANVKQWL	-0.12495	-0.12495	-0.12495	-0.12495	-0.13765	-0.12495	16302.7	186.08	16651.8	31566.5	9483.09	222.22	43.04	1107.57	9	0.1	554.793	80.67	288510	0	4	F4:22183	MSB66431A.raw	Q9H0U4|Q92928
VLKPGMVVTF	-0.12278	-0.12278	-0.12278	-0.12278	-0.05278	-0.12278	5029.71	444.2	17330.6	27774.5	4567.91	5544.38	39.99	1089.63	10	-2.3	545.819	87.14	510230	0	1	F1:24189	MSB66428A.raw	P68104|Q5VTE0
YYFDSYAHF	-0.05234	-0.05234	-0.05234	-0.05234	-0.09034	-0.05234	3221.43	5.88	24107.2	16519.2	4736.52	14.21	15.05	1211.49	9	-0.5	606.753	92.04	453440	0	3	F3:25358	MSB66430A.raw	Q99873|Q9NR22
PYLQGQVTL	-0.13868	-0.13868	-0.13868	-0.13868	-0.13508	-0.13868	28254.3	243.69	34281.2	35411.4	25661.3	6248.57	23.44	1017.55	9	-1.1	509.781	81.04	69518		3	F3:22391	MSB66430A.raw	O15533
RYPTSIASLAF	-0.10017	-0.10017	-0.10017	-0.10017	-0.09657	-0.10017	18991.8	47.46	2734.83	13973.8	7872.6	1595.57	20.56	1224.65	11	-1.9	613.331	96.35	475800		3	F3:26550	MSB66430A.raw	O43684
KYTPPPHHI	0.0264	0.0264	0.0264	0.0264	0.0138	0.0264	17844.9	87.86	29382	25957	11863.4	1980.5	25.74	1088.58	9	-0.7	545.295	15.53	89050		1	F1:3837	MSB60101A.raw	O43920
VYVDAVGQF	0.0736	0.0736	0.0736	0.0736	0.0602	0.0736	17454.4	37.46	29228.8	30852.3	16230.2	146.08	22.62	996.492	9	-1.9	499.252	82.73	234180		3	F3:22938	MSB66430A.raw	O60308
YYVRAVLHL	0.15198	0.15198	0.15198	0.15198	0.13858	0.15198	2527.4	21.47	20623.4	21265.3	5454.23	61.35	22.52	1132.64	9	0.7	378.554	73.35	50404		3	F3:20312	MSB66430A.raw	P13498
FTFASPTQVF	-0.13163	-0.13163	-0.13163	-0.13163	-0.16963	-0.13163	574.28	270.81	9894.06	14957.7	4755.67	773.36	29.31	1143.56	10	-3.3	572.785	106.83	2127300		1	F1:31268	MSB66428A.raw	P30049
IYTSSVNRL	-0.25133	-0.25133	-0.25133	-0.25133	-0.26393	-0.25133	20510.3	105.47	27579.9	29920.3	5651.76	205.99	18.19	1051.57	9	0.2	526.79	49.19	107040		1	F1:13336	MSB66428A.raw	P35606
AYAGARFVF	0.25654	0.25654	0.25654	0.25654	0.24384	0.25654	14408.9	16.59	12158	30427.3	13813.8	109.75	38.17	1000.51	9	-0.8	501.263	82.62	1720700		1	F1:22947	MSB66428A.raw	P40926
PYISNIYLI	-0.01389	-0.01389	-0.01389	-0.01389	-0.05709	-0.01389	10901.7	6.29	37098.3	22206.3	27684.2	3879.85	15.74	1094.6	9	-2	548.307	109.45	787280		3	F3:31119	MSB66430A.raw	Q02809
RYLPKGFLNQF	-0.16134	-0.16134	-0.16134	-0.16134	-0.15774	-0.16134	12747.9	14.73	987.12	23105.6	15531.8	3273.89	39.82	1381.75	11	0.2	691.883	85.32	628890		3	F3:23607	MSB66430A.raw	Q05397
AYSAKIALF	-0.07251	-0.07251	-0.07251	-0.07251	-0.01881	-0.07251	21304.7	16.86	28669.1	35254.3	14119.8	280.28	31.12	982.549	9	0.6	492.282	78.43	1319200		1	F1:22946	MSB60101A.raw	Q12882
TWYPVSIPAF	0.00552	0.00552	0.00552	0.00552	0.00672	0.00552	11420.4	39.93	19989.1	25873.5	8221.24	1107.1	22.09	1179.6	10	2.6	590.807	111.36	1058500		3	F3:31847	MSB66430A.raw	Q14692
RYIFAKNLF	-0.01584	-0.01584	-0.01584	-0.01584	-0.05904	-0.01584	16981.8	7.93	21204.9	27685.1	16717.5	244.99	34.69	1170.65	9	-1.8	586.334	82.41	233570		4	F4:22652	MSB66431A.raw	Q16854
AYKKTHETL	-0.11157	-0.11157	-0.11157	-0.11157	-0.04157	-0.11157	25725	230.5	15752.7	35468.9	10073.1	586.08	28.28	1089.58	9	-0.8	545.798	12.07	42937		1	F1:2827	MSB60101A.raw	Q16890
IYTKIMDLI	-0.22786	-0.22786	-0.22786	-0.22786	-0.24046	-0.22786	10916.3	21.48	34636.1	14708.2	24306	3485.89	38	1108.62	9	-1.3	555.317	103.4	792080		1	F1:29771	MSB66428A.raw	Q2PZI1
FYHEAVVLF	0.21657	0.21657	0.21657	0.21657	0.20607	0.21657	5640.4	14.25	27057	21176.7	10214.6	38.76	15.08	1123.57	9	-5	562.79	96.3	282290		3	F3:26579	MSB66430A.raw	Q49AM3
PFLPASNLFF	-0.08481	-0.08481	-0.08481	-0.08481	-0.08121	-0.08481	4406.69	106.59	30812.3	30149.8	5104.33	8971.55	20.92	1151.6	10	1.9	576.809	113.98	401130		1	F1:35995	MSB60101A.raw	Q5T4D3
VYKPAQNSW	-0.25422	-0.25422	-0.25422	-0.25422	-0.18422	-0.25422	35919.2	143.99	29281.1	31948.2	23047.4	2333.66	14.04	1091.54	9	1.3	546.778	37.95	15438		1	F1:10539	MSB60101A.raw	Q86V97
EYFKSFNF	-0.23536	-0.23536	-0.23536	-0.23536	-0.27336	-0.23536	34631.2	358.89	37774.7	32099.3	38395.7	6635.15	26.59	1080.49	8	-4.2	541.251	90.99	97139		1	F1:25346	MSB66428A.raw	Q8N1A6
IYPTTYVQF	0.03694	0.03694	0.03694	0.03694	0.04054	0.03694	20426.2	12.59	30264.5	31681.4	3061.67	129.23	31.47	1130.56	9	-1.5	566.289	97.46	1484300		1	F1:27512	MSB66428A.raw	Q96S97
IYPTTYVQF	0.03694	0.03694	0.03694	0.03694	0.04054	0.03694	20426.2	12.59	30264.5	31681.4	3061.67	129.23	31.47	1130.56	9	-1.5	566.289	97.46	492840		1	F1:27512	MSB66428A.raw	Q96S97
IYPTTYVQF	0.03694	0.03694	0.03694	0.03694	0.04054	0.03694	20426.2	12.59	30264.5	31681.4	3061.67	129.23	32.23	1130.56	9	-0.1	566.29	93.71	1906200		1	F1:28311	MSB60101A.raw	Q96S97
RFLNDPGHLLW	0.0483	0.0483	0.0483	0.0483	0.0519	0.0483	10468.2	135.99	27611.8	25923.9	28960	14877.2	33.39	1366.71	11	2.8	684.366	95.27	548590		1	F1:26729	MSB66428A.raw	Q9H633
VLPSSLPTF	-0.32829	-0.32829	-0.32829	-0.32829	-0.32469	-0.32829	738.49	54.06	17993.5	24704.2	76.72	1375.41	32.38	959.533	9	-1	480.773	100.99	2794100		3	F3:27902	MSB66430A.raw	Q9HC84
VLPSSLPTF	-0.32829	-0.32829	-0.32829	-0.32829	-0.32469	-0.32829	738.49	54.06	17993.5	24704.2	76.72	1375.41	32.38	959.533	9	-1	480.773	100.99	5010700		3	F3:27902	MSB66430A.raw	Q9HC84
VLPSSLPTF	-0.32829	-0.32829	-0.32829	-0.32829	-0.32469	-0.32829	738.49	54.06	17993.5	24704.2	76.72	1375.41	36.4	959.533	9	-1.2	480.773	96.75	31626000		1	F1:29456	MSB60101A.raw	Q9HC84
LYQFNPAFF	0.16488	0.16488	0.16488	0.16488	0.20248	0.16488	19922.8	6.85	25558.2	25957.6	11339.8	141.46	32.56	1145.55	9	-1.5	573.784	110.25	738350		3	F3:31387	MSB66430A.raw	Q9UBQ5
LYQFNPAFF	0.16488	0.16488	0.16488	0.16488	0.20248	0.16488	19922.8	6.85	25558.2	25957.6	11339.8	141.46	32.56	1145.55	9	-1.5	573.784	110.25	322390		3	F3:31387	MSB66430A.raw	Q9UBQ5
IFEAPKDFNF	-0.03303	-0.03303	-0.03303	-0.03303	-0.06553	-0.03303	19782.8	122.69	32184.8	30202	27641.1	8040.29	22.24	1226.6	10	-2.3	614.304	94.74	74896		3	F3:26133	MSB66430A.raw	Q9UG56
SFRWSSYLL	-0.08674	-0.08674	-0.08674	-0.08674	-0.10354	-0.08674	8835.63	175.43	4002.52	22856.7	3366.57	581.76	15.84	1157.59	9	1.3	579.802	82.04	4328800		3	F3:22747	MSB66430A.raw	Q9UIE0
GYMEGYYTF	0.09283	0.09283	0.09283	0.09283	0.14983	0.09283	3555.18	3.52	24107.7	23685.8	17313.6	192.06	29.23	1129.44	9	-0.2	565.729	97.83	146180		3	F3:26985	MSB66430A.raw	Q9UK99
TYVSGTLRF	-0.06265	-0.06265	-0.06265	-0.06265	-0.07605	-0.06265	20907.8	15.45	25562.4	27574.8	18489.2	159.48	35.78	1042.54	9	0.9	522.28	75.39	4385900		1	F1:20920	MSB66428A.raw	Q9Y6K0
TYVSGTLRF	-0.06265	-0.06265	-0.06265	-0.06265	-0.07605	-0.06265	20907.8	15.45	25562.4	27574.8	18489.2	159.48	36.46	1042.54	9	-0.4	522.279	68.76	3331800		2	F2:19875	MSB60102A.raw	Q9Y6K0
FPVGRIHRHL	0.32053	0.32053	0.32053	0.32053	0.30713	0.32053	11087.5	27158.8	101.45	4437.12	14198.1	12739.5	23.66	1230.71	10	1.5	411.244	39.35	49483	0	1	F1:10508	MSB66428A.raw	P0C0S5|Q71UI9
TPQQAQALGIL	-0.09484	-0.09484	-0.09484	-0.09484	-0.05724	-0.09484	7383.51	35314.2	471.69	17174.4	32028.9	31664	13.89	1138.63	11	-9.6	570.319	109.46	49183000		1	F1:34255	MSB60101A.raw	A6NE01
LPALLPVPAV	0.0323	0.0323	0.0323	0.0323	0.0196	0.0323	592.49	34848.5	252.98	644.04	25817.5	28426.7	41.91	988.632	10	-1	495.323	109.11	474290		1	F1:34120	MSB60101A.raw	O95407
YVKRALANSL	-0.05591	-0.05591	-0.05591	-0.05591	0.01409	-0.05591	1533.21	23681.4	302.71	24098.6	9349.02	8611.84	20.73	1133.66	10	-3.5	567.833	40.72	69102		1	F1:10897	MSB66428A.raw	P04075
RPRGSQSLL	-0.36534	-0.36534	-0.36534	-0.36534	-0.38214	-0.36534	27009.9	30729.4	3.06	8348.35	9645.97	13350.4	13.56	1012.58	9	-0.3	507.296	20.55	381700		1	F1:5355	MSB60101A.raw	P21860
RLKLPAVVTADL	0.10906	0.10906	0.10906	0.10906	0.17906	0.10906	5045.9	27525.9	244.07	20543.8	24072.3	28372	47.6	1294.8	12	-0.3	648.406	88.66	2218500		3	F3:24483	MSB66430A.raw	P38117
RLKLPAVVTADL	0.10906	0.10906	0.10906	0.10906	0.17906	0.10906	5045.9	27525.9	244.07	20543.8	24072.3	28372	47.6	1294.8	12	-0.3	648.406	88.66	5891800		3	F3:24483	MSB66430A.raw	P38117
LKNSPLVSRLTL	-0.24903	-0.24903	-0.24903	-0.24903	-0.24693	-0.24903	23274.7	32638.3	162.86	10153.5	21590.8	19898	50.4	1339.82	12	-0.7	670.916	79.23	533900		1	F1:21973	MSB66428A.raw	P40926
GPRKGREV	-0.03398	-0.03398	-0.03398	-0.03398	-0.05078	-0.03398	42777.5	46036.6	219.13	30544.8	34207.1	39139.8	26.52	897.514	8	-2.2	449.764	10.18	213850		1	F1:2278	MSB66428A.raw	Q07020
LPETLNQPL	-0.04957	-0.04957	-0.04957	-0.04957	-0.08207	-0.04957	19900.8	38210	91.36	4663.6	20644.8	22741.5	15	1023.56	9	-0.5	512.787	81.48	440540		1	F1:23971	MSB60101A.raw	Q8TCC7
TPSKTRTSTL	-0.2629	-0.2629	-0.2629	-0.2629	-0.2092	-0.2629	31222	35366.2	8.14	11900.4	13202.4	20384.4	28.69	1090.6	10	2.2	546.308	12.58	576980		1	F1:2954	MSB60101A.raw	Q9HC84
GPLPRTVEL	0.16552	0.16552	0.16552	0.16552	0.16912	0.16552	17853.6	36346.9	21.49	7094.53	14418.9	14818.5	29.8	980.565	9	-0.6	491.29	64.83	965730		1	F1:18756	MSB60101A.raw	Q9Y2Q3
KGPGSTKEL	-0.21756	-0.21756	-0.21756	-0.21756	-0.21396	-0.21756	25048.7	27688.4	19943.5	40214.7	233.55	16288.1	12.82	915.503	9	0.2	458.759	12.55	69733		1	F1:2981	MSB60101A.raw	Q13123
NLPIGFLEL	0.32266	0.32266	0.32266	0.32266	0.32626	0.32266	312.67	4459.35	17329.5	26619.7	64.24	1907.87	18.05	1014.58	9	-3.2	508.293	113.57	908820		1	F1:35838	MSB60101A.raw	Q96N11
VFNDVRLLL	0.0933	0.0933	0.0933	0.0933	0.0954	0.0933	5091.42	393.16	11206.4	18470.6	5846.06	243.01	26.54	1087.64	9	-0.8	544.826	103.4	827350	0	1	F1:29699	MSB66428A.raw	P47755|P52907
TRVDTILEF	0.24794	0.24794	0.24794	0.24794	0.23454	0.24794	16998.2	13504.7	27426.3	28724.7	31816.1	85.61	31.02	1092.58	9	-0.1	547.298	91.24	1013900		3	F3:25089	MSB66430A.raw	O14980
YRVFTTQEL	0.16628	0.16628	0.16628	0.16628	0.15288	0.16628	8904.25	17005.2	14401	26117.3	13100.7	28.06	37.33	1155.59	9	0.7	578.804	74.29	118530		1	F1:20600	MSB66428A.raw	O95433
NRLPLVVSF	-0.04852	-0.04852	-0.04852	-0.04852	-0.04492	-0.04852	14883.5	8861.86	24820.8	23103.1	34724.7	116.63	45.37	1043.61	9	-0.6	522.813	97.13	4104600		3	F3:26785	MSB66430A.raw	Q9UHA4
NRLPLVVSF	-0.04852	-0.04852	-0.04852	-0.04852	-0.04492	-0.04852	14883.5	8861.86	24820.8	23103.1	34724.7	116.63	45.37	1043.61	9	-0.6	522.813	97.13	14456000		3	F3:26785	MSB66430A.raw	Q9UHA4
VYAQKHQQL	-0.44885	-0.44885	-0.44885	-0.44885	-0.46155	-0.44885	26526.6	111.2	15659.1	34531	2801.44	92.54	27.93	1113.59	9	-0.6	557.803	14.59	78546		1	F1:3610	MSB60101A.raw	Q9UPN9

## Sheet: All Gemcitabine Peptides
Peptide	HLA-A*02:06 Binding Affinity (nM)	HLA-A*24:02 Binding Affinity (nM)	HLA-B*07:02 Binding Affinity (nM)	HLA-B*59:01 Binding Affinity (nM)	HLA-C*01:02 Binding Affinity (nM)	HLA-C*07:02 Binding Affinity (nM)	-10lgP	Mass	Length	ppm	m/z	RT	No Treatment Area	Gemcitabine Area	Fraction	Scan	Source File	Source Protein (Uniprot)
YLPELLQTV	3.22	2808.17	22241.4	12037.8	69.14	607.48	29.84	1074.6	9	2.6	538.307	107.16		13409000	2	F2:32727	MSB60102A.raw	O14682|ENC1_HUMAN
LLIENVASL	12.02	10977.1	6921.95	15773.5	438.81	1117.47	32.34	970.57	9	-0.1	486.292	103.76	46109000	342700000	1	F1:31932	MSB60101A.raw	P07203|GPX1_HUMAN
VLIENVASL	20.5	7451.64	8707.98	19363.5	285.53	926.53	35.12	956.554	9	-1	479.284	90.9	1091500000	1192200000	1	F1:27176	MSB60101A.raw	P18283|GPX2_HUMAN
SLPEVLPIL	17.06	3281.45	17563	24300.5	40.07	873.49	28.51	979.595	9	-1	490.804	111.44	798130	3717500	2	F2:34561	MSB60102A.raw	P23229|ITA6_HUMAN
ITPENLPQI	58.55	2878	28655.2	17483.9	145.02	3843.42	24.42	1023.56	9	-0.1	512.787	81.45	440540	2080000	2	F2:23687	MSB60102A.raw	P43243|MATR3_HUMAN
FLPSYIIDV	4.59	11713	30026	16183.4	263.26	1532.06	34.17	1065.57	9	-0.9	533.794	109.68	9892800	5891400	2	F2:33793	MSB60102A.raw	Q10570|CPSF1_HUMAN
FVDPNGKISL	233.74	26593.2	5384.75	23256.1	262.15	5731.01	30.51	1088.59	10	0	545.301	67.52		1487300	2	F2:19539	MSB60102A.raw	Q92538|GBF1_HUMAN
FQAEIAQLM	7.2	7537.03	14735.6	10437.5	3742.95	276.02	25.77	1049.52	9	1.3	525.769	99.14		2222700	2	F2:29714	MSB60102A.raw	P07900|HS90A_HUMAN:P08238|HS90B_HUMAN:Q14568|HS902_HUMAN:Q58FF8|H90B2_HUMAN
FAYDGKDYL	29.94	24797.7	8585.88	4396.64	538.41	380.84	30.93	1090.5	9	-0.8	546.255	71.73	146470	3824500	2	F2:20730	MSB60102A.raw	P13747|HLAE_HUMAN
YQTEIGQTL	12.47	6919.26	10113	13902.5	1571.01	393.6	35.75	1051.52	9	-1.2	526.766	62.12	624810	2371800	2	F2:17879	MSB60102A.raw	P14324|FPPS_HUMAN
FQIVNPHLL	15.82	2501.56	20512.5	10474.3	2673.53	418.92	30.31	1079.61	9	0.2	540.814	88.94		24366000	2	F2:26092	MSB60102A.raw	P23921|RIR1_HUMAN
SLIGHLQTL	9.12	4721.98	4174.26	19050.5	515.36	488.29	23.28	980.566	9	-1	491.29	78	369420	7687800	2	F2:22631	MSB60102A.raw	Q16690|DUS5_HUMAN
FQDDNNLYL	5.11	15173.4	14726.5	13453.2	1655.04	259.78	21.96	1140.51	9	-1.8	571.261	80.11	277020	2234400	2	F2:23291	MSB60102A.raw	Q5VT25|MRCKA_HUMAN
YVFPGVTRL	10.73	8965.92	6140.27	8259.85	548.24	229.75	23.35	1050.59	9	0.3	526.301	82.13		933840	2	F2:23942	MSB60102A.raw	Q9H0A9|SPC1L_HUMAN
RVFIGNLNTL	157.12	724.27	3312.05	18771	6882.3	5060.99	34.37	1145.66	10	-0.3	573.835	80.32		1161000	2	F2:23422	MSB60102A.raw	B2RXH8|HNRC2_HUMAN:P0DMR1|HNRC4_HUMAN:B7ZW38|HNRC3_HUMAN:O60812|HNRC1_HUMAN:P07910|HNRPC_HUMAN
SVHKGFAFV	9.88	14672.1	7628.83	10704.2	7023.57	8156.83	33.34	990.529	9	0.3	496.272	49.63	1837300	9064900	2	F2:14204	MSB60102A.raw	B2RXH8|HNRC2_HUMAN:P0DMR1|HNRC4_HUMAN:B7ZW38|HNRC3_HUMAN:O60812|HNRC1_HUMAN:P07910|HNRPC_HUMAN
AVFQEAAEV	40.76	33966.2	19340.4	16477	11672.7	15144.7	18.45	962.471	9	-0.5	482.243	64.35		3008700	2	F2:18614	MSB60102A.raw	O00212|RHOD_HUMAN
NLLPKLHIV	19.34	17140.6	23977.9	12365.2	14681.8	7434.65	39.14	1045.66	9	-0.7	523.839	77.04	1329600	9040100	2	F2:22381	MSB60102A.raw	O00299|CLIC1_HUMAN:Q9Y696|CLIC4_HUMAN
SVLKSLVEI	21.27	9779.75	11345.9	11533.7	10242.5	15464.6	30.62	986.601	9	-0.4	494.308	83.83	5501900	9996700	1	F1:24746	MSB60101A.raw	O00410|IPO5_HUMAN
FVDDYTVRV	5.01	26471.8	20704.5	9223.72	4442.3	2373.44	41.97	1112.55	9	0.9	557.283	67.54	4743700	12182000	2	F2:19515	MSB60102A.raw	O00487|PSDE_HUMAN
GLIEILKKV	11.96	34187.8	35570.4	23506.5	30745.4	19616.3	36.18	1011.67	9	0.1	338.23	85.83	691310	2294400	2	F2:25108	MSB60102A.raw	O14737|PDCD5_HUMAN
SVIDHIHLI	4.36	2196.56	14019.1	6239.45	3175.3	963.52	31.59	1045.59	9	0.4	523.803	78.45		3607900	2	F2:22820	MSB60102A.raw	O14908|GIPC1_HUMAN
IIDDTIFNL	15.33	17398.2	21982.6	18438.7	5058.2	6280.3	34.02	1062.56	9	-0.5	532.287	109.9	6907200	18109000	1	F1:34444	MSB60101A.raw	O15118|NPC1_HUMAN
FQDPVPLTV	6.25	13867.9	20908.5	5759.17	5253.59	1144.25	24.26	1014.54	9	0.1	508.277	95.58		19416000	2	F2:28481	MSB60102A.raw	O15164|TIF1A_HUMAN
YVITDLTQL	8.74	15772	9962.38	19872.9	2599.54	2351.48	29.2	1064.58	9	-0.1	533.295	105.65	4305200	15501000	2	F2:32115	MSB60102A.raw	O43187|IRAK2_HUMAN
GQVDMDIKL	82.89	31323.9	34100.3	28993.6	30970.7	19472.3	20.91	1017.52	9	7.2	509.769	72.3		128000	2	F2:20929	MSB60102A.raw	O43896|KIF1C_HUMAN
LVLDSVKLEA	348.21	40097.4	24690.8	21882	35982.7	33307.2	33.69	1085.63	10	-1.6	543.823	77.62	9474300	13738000	1	F1:22682	MSB60101A.raw	O75347|TBCA_HUMAN
GVIEKLLTS	271.83	39775.4	29044.1	35778.1	36237	27907.1	28.34	958.57	9	-1.6	480.291	79.52		1007900	2	F2:23193	MSB60102A.raw	O75534|CSDE1_HUMAN
FLEKLLPPV	4.62	24940.5	16087.9	11075.1	9473.04	11059.8	28.93	1054.64	9	-0.6	528.328	97.31	6475000	9716300	2	F2:29145	MSB60102A.raw	O95372|LYPA2_HUMAN
FGFEITHEV	8.78	15752	18326.5	1000.8	4196.05	1373.51	33.82	1077.51	9	-0.5	539.764	80.14		1176800	2	F2:23376	MSB60102A.raw	O96015|DNAL4_HUMAN
TILPAIILV	9.93	18068.6	28379	8228.99	18000.5	14667.8	15.55	951.637	9	-0.4	476.825	113.68		8156100	2	F2:35439	MSB60102A.raw	P00403|COX2_HUMAN
KVLPGVDALSNI	306.68	22032.1	24030.1	21589.2	24862.7	34948.6	45.07	1224.71	12	-0.1	613.361	84.92	84188000	127890000	2	F2:24771	MSB60102A.raw	P00558|PGK1_HUMAN
KVLNNMEIGTSL	497.78	26572	3228.76	32265.7	17808.9	27322.4	18.91	1317.7	12	0.6	659.856	72.95		1814900	2	F2:21144	MSB60102A.raw	P00558|PGK1_HUMAN
FRVPTANVSV	248.5	27075.2	20557.8	20617.1	1172.22	1498.08	39.02	1088.6	10	0	545.306	69.15	9599900	8815900	2	F2:19950	MSB60102A.raw	P04406|G3P_HUMAN
RLASYLDRV	7.97	15223.4	22719.9	17170.7	13787.9	14420.6	34.13	1091.61	9	-0.1	546.812	55.66	1282800	2551200	2	F2:15837	MSB60102A.raw	P05783|K1C18_HUMAN
YVTFLGALAL	115.96	16341.8	3216.14	13702.9	5320.06	11405.5	45.86	1066.61	10	0.1	534.31	114.6	1503300000	1495700000	1	F1:36171	MSB60101A.raw	P06703|S10A6_HUMAN
VTFLGALAL	315.94	13097	5588.65	13328.3	2373.9	6774.58	29.95	903.543	9	0.3	452.779	112.15	2333900000	3195400000	2	F2:34775	MSB60102A.raw	P06703|S10A6_HUMAN
ALVVQVAEA	246.34	41172.7	27819	33262.2	30500.8	31384.3	28.63	898.512	9	0.3	450.264	63.88	10134000	27000000	2	F2:18299	MSB60102A.raw	P07686|HEXB_HUMAN
GQFGVGFYSA	21.98	23310.5	29980.6	22177.8	39684.3	29918.7	43.87	1031.47	10	-0.1	516.743	84.02	10273000	23512000	2	F2:24567	MSB60102A.raw	P07900|HS90A_HUMAN:P08238|HS90B_HUMAN:Q58FF6|H90B4_HUMAN:Q12931|TRAP1_HUMAN:P14625|ENPL_HUMAN
GVLPNIQAV	11.36	29620.4	16202.8	17702.6	11637	12228.8	36.84	909.528	9	-0.3	455.771	86.35	3733800	19715000	2	F2:25303	MSB60102A.raw	P0C0S8|H2A1_HUMAN:Q6FI13|H2A2A_HUMAN:Q93077|H2A1C_HUMAN:P04908|H2A1B_HUMAN:Q7L7L0|H2A3_HUMAN:P20671|H2A1D_HUMAN:Q99878|H2A1J_HUMAN:Q8IUE6|H2A2B_HUMAN:Q9BTM1|H2AJ_HUMAN:Q96KK5|H2A1H_HUMAN:Q16777|H2A2C_HUMAN:P16104|H2AX_HUMAN:Q96QV6|H2A1A_HUMAN
VQLAIFANM	47.53	4383.1	23078.1	19638	16791.1	8760.52	31.96	1005.53	9	0	503.773	109.22		8591900	2	F2:33641	MSB60102A.raw	P0C6T2|OST4_HUMAN
NIIPRFVQV	10.4	17708.4	13267.1	8930.68	6645.5	3330.92	26.74	1084.64	9	0.8	543.327	85.83		15511000	2	F2:25122	MSB60102A.raw	P0DMP2|SRG2B_HUMAN:P0DJJ0|SRG2C_HUMAN:O75044|SRGP2_HUMAN
SQIHDIVLV	3.54	14777.6	30770.3	13839	19957.3	10342.4	18.35	1022.58	9	-1.3	512.295	72.56		1354200	2	F2:20952	MSB60102A.raw	P11142|HSP7C_HUMAN
NQPGVLIQV	25.91	16787.8	33121	19249.4	7164.41	4746.57	39.8	966.55	9	-0.4	484.282	77.62	9367800	11923000	1	F1:22776	MSB60101A.raw	P11142|HSP7C_HUMAN:P0DMV8|HS71A_HUMAN:P0DMV9|HS71B_HUMAN:P34931|HS71L_HUMAN
SQIEADFRL	7.58	9679.63	23333	15663	13835.7	6103.58	33.25	1077.55	9	0.2	539.78	75.82	10432000	63283000	2	F2:22049	MSB60102A.raw	P11387|TOP1_HUMAN
LLLDVPTAAV	20.07	32520.5	15648.4	14074.2	16471.2	23048.9	25.56	1010.6	10	0.2	506.308	102.57	352030	4718700	2	F2:30931	MSB60102A.raw	P13284|GILT_HUMAN
LILDPIFKV	5.58	21063.6	29294.4	6914.76	22695	14149.4	26.63	1056.66	9	0.9	529.337	106.95		16539000	2	F2:32638	MSB60102A.raw	P13639|EF2_HUMAN
AVIDVGINRV	33.99	36200.6	27938.8	25533.1	30923.8	29743.5	29.68	1054.61	10	-0.8	528.314	66.49		4679900	2	F2:19136	MSB60102A.raw	P13995|MTDC_HUMAN
YGIPAIVKL	470.47	9084.08	16281.9	10354.5	2024.32	2109.15	31.54	972.601	9	-0.2	487.308	90.57	0	29872000	1	F1:27112	MSB60101A.raw	P14923|PLAK_HUMAN
AVIPRLVQL	22.48	14580	2896.65	22535.3	2347.01	2406.04	26.13	1007.65	9	0	504.832	84.97	5899300	26015000	2	F2:24971	MSB60102A.raw	P14923|PLAK_HUMAN
TALLKIEGV	328.72	33240.2	27169.7	10590.5	22767.3	23652	32.19	942.575	9	0.2	472.295	73.61	3086500	7711000	2	F2:21272	MSB60102A.raw	P18077|RL35A_HUMAN
FLLDALSEDF	209.99	6144.73	20763.5	22121.9	17388.7	8538.17	47.09	1168.57	10	-0.2	585.29	113.52	103060000	200030000	1	F1:35952	MSB60101A.raw	P20810|ICAL_HUMAN
FLLDALSED	365.91	39294.6	36285.6	33170.5	36821.2	32945.5	38.73	1021.5	9	0	511.756	104.95	289650000	488580000	1	F1:32436	MSB60101A.raw	P20810|ICAL_HUMAN
SIIDKLVNI	7.85	11052.5	17823.9	14622.8	5554.58	4961.66	22.83	1013.61	9	1.7	507.814	99.41		689840	2	F2:29799	MSB60102A.raw	P21583|SCF_HUMAN
FVDPAQITM	36.29	21021.7	5921.18	12687.4	1262.81	1032	31.37	1020.5	9	0	511.255	88.47		1932300	2	F2:26026	MSB60102A.raw	P23921|RIR1_HUMAN
YLIPLLERL	6.66	4732.88	18975	12680.9	2640.53	1076.83	29.76	1128.69	9	-1.1	565.352	109.73	3945300	6705600	2	F2:33825	MSB60102A.raw	P26196|DDX6_HUMAN
NQTPVTLQV	79.33	20465.1	26255.6	9074.84	20742.4	5363.58	28.2	998.54	9	-0.6	500.277	64.71	2112200	2552900	1	F1:18823	MSB60101A.raw	P26368|U2AF2_HUMAN
FSWEGAFQHV	9.23	8864.73	25187.3	5237.02	12402.6	13144.7	47.62	1206.55	10	0.2	604.28	94.49		15337000	2	F2:28066	MSB60102A.raw	P26641|EF1G_HUMAN
GQLDFSEFL	7.25	15479.2	33361.3	21941	20261.3	6808.16	41.21	1054.5	9	-0.6	528.255	111	29676000	52395000	2	F2:34325	MSB60102A.raw	P31949|S10AB_HUMAN
FTVDKDITL	33.24	22925.8	13716.1	15680.1	747.96	1752.19	25.84	1050.56	9	-0.3	526.287	75.57	1961800	2310800	2	F2:21908	MSB60102A.raw	P33176|KINH_HUMAN
VLLESEQFLTEL	176.75	30134.4	32105.5	33763.6	19796.7	27657	58.08	1419.75	12	0.5	710.882	112.64	997970000	1819100000	1	F1:35472	MSB60101A.raw	P37108|SRP14_HUMAN
VLLESEQFL	50.84	16892.4	28765.5	23589.6	4909.49	8869.34	40.09	1076.58	9	-0.4	539.295	103.84	729640000	378360000	1	F1:31962	MSB60101A.raw	P37108|SRP14_HUMAN
WVDPNSPVL	51.7	20814.6	2618.2	13144	875.64	1479.97	26.19	1025.52	9	-1.5	513.766	80.87	784300	880460	1	F1:23816	MSB60101A.raw	P42330|AK1C3_HUMAN:Q04828|AK1C1_HUMAN:P52895|AK1C2_HUMAN:P17516|AK1C4_HUMAN
KQLDDLKVEL	47.95	25658.2	25760.6	33341.8	20071.2	19635.8	37.73	1199.68	10	-0.6	600.845	65.66	2872800	10071000	2	F2:18906	MSB60102A.raw	P42766|RL35_HUMAN
AIVKEIVNI	116.05	23942.1	26948.3	24176.7	24600.2	28576.5	26.38	997.617	9	0.5	499.816	73.61	1311000	2873600	1	F1:21403	MSB60101A.raw	P43246|MSH2_HUMAN
IQINVGTTV	21.32	15292	22130.8	12487.1	11678.7	9445.09	28.87	943.534	9	-2.1	472.773	71.31	1664300	1542000	1	F1:20762	MSB60101A.raw	P46379|BAG6_HUMAN
STIRLLTSL	35.44	7116.59	2052.27	18727.4	2402.56	7681.84	30.73	1002.61	9	-0.6	502.311	84.79	6876600	21123000	2	F2:24798	MSB60102A.raw	P49368|TCPG_HUMAN
EVISKLYAV	14.41	18875.5	11552.4	10066.5	19228.6	10161.5	30.09	1020.59	9	0.4	511.3	67.27		797170	2	F2:19446	MSB60102A.raw	P50990|TCPQ_HUMAN
NVPEGLLATV	86.21	24066.8	6442.73	7161.08	4917.25	18942.2	34.1	1011.56	10	-0.3	506.787	94.64	0	1564200	2	F2:28137	MSB60102A.raw	P50993|AT1A2_HUMAN:P05023|AT1A1_HUMAN:Q13733|AT1A4_HUMAN:P13637|AT1A3_HUMAN:P54707|AT12A_HUMAN
GQDVGRYQV	205.45	28762	28570.1	29836	30307.4	26165.4	34.98	1020.5	9	-0.6	511.256	30.3	2523100	2279000	2	F2:8278	MSB60102A.raw	P51571|SSRD_HUMAN
FQDEINWRL	3.33	6452.77	20062.5	8564.18	6855.25	854.93	35.12	1219.6	9	-1.6	610.806	89.99	13784000	54082000	2	F2:26607	MSB60102A.raw	P51784|UBP11_HUMAN
GVVPQLVKL	170.27	29704.5	18440.5	28199.7	17795.8	14833.1	34.03	951.612	9	0.5	476.813	81.3	3337400	10796000	2	F2:23635	MSB60102A.raw	P52292|IMA1_HUMAN
GTVEQIVYL	21.46	25444.2	26240	27637.8	10052.6	8193.36	27.72	1020.55	9	0.3	511.282	94.31		1009700	2	F2:28099	MSB60102A.raw	P52292|IMA1_HUMAN
TVLQELINV	11.15	27282.5	29858.9	14053.8	24687.1	22475.1	27.73	1027.59	9	-0.4	514.803	109.48		5803500	2	F2:33738	MSB60102A.raw	P52732|KIF11_HUMAN
VIIKGLEEI	30.02	9463.92	20485.7	14217.3	10557.8	17481.1	24.2	1012.62	9	-1	507.315	77.65	1048900	11213000	2	F2:22654	MSB60102A.raw	P52732|KIF11_HUMAN
NVLGKLLSV	9.71	22609.5	9843.98	9047.88	13276.5	7242.66	15.52	941.591	9	-0.3	471.803	94.57	1641600	2742500	2	F2:28326	MSB60102A.raw	P53355|DAPK1_HUMAN
FVLPELPSV	2.06	16944.4	14404.7	3528.39	4550.15	3321.09	34.59	999.564	9	-0.3	500.789	109.8	12188000	21370000	1	F1:34387	MSB60101A.raw	P53990|IST1_HUMAN
SQVDVAVKI	45.57	17344.5	30217.3	13267.1	23140.9	11431.6	21.39	957.549	9	0.4	479.782	55.46		316690	2	F2:15749	MSB60102A.raw	P54278|PMS2_HUMAN
AQIKEMVEL	14.37	14438.5	22686.5	30225.2	14153.6	8562.97	26.69	1059.56	9	-3	530.787	68.17		1297700	2	F2:19608	MSB60102A.raw	P55072|TERA_HUMAN
TILPKVMQV	20.08	22193.8	18678	9690.74	9371.19	5961.61	22.95	1027.61	9	-1.2	514.812	77.32		1053300	2	F2:22455	MSB60102A.raw	P55081|MFAP1_HUMAN
FVDRGFYSV	2.8	12581.7	8168.22	7662.83	3573.38	3960.05	18.55	1088.53	9	1.2	545.273	67.42		529420	2	F2:19539	MSB60102A.raw	P60510|PP4C_HUMAN
KVLDFEHFL	8.38	8686.71	20779	15637.7	9133.36	5364.57	40.14	1146.61	9	0.7	383.21	92.9		3601000	2	F2:27511	MSB60102A.raw	P60660|MYL6_HUMAN
FAISILQQI	10.96	9234.21	15710.8	1755.95	5359.41	3265.61	30.97	1031.6	9	-0.1	516.808	110.65	10653000	17207000	2	F2:34195	MSB60102A.raw	P60842|IF4A1_HUMAN
FSLIAGLTIA	48.74	33274.4	22158.8	14391.8	29246.9	28742.1	37.48	1004.59	10	-0.1	503.303	112.84	52062000	53105000	1	F1:35556	MSB60101A.raw	P60903|S10AA_HUMAN
QLVDIIEKV	13.03	30741	35573.5	14122.6	27498.8	18272.5	32.35	1055.62	9	0	528.819	88.22	14815000	25210000	2	F2:25993	MSB60102A.raw	P61289|PSME3_HUMAN
SIIGRLLEV	3.89	16161	5905.57	11265.8	4008.07	2286.5	28.22	998.612	9	0.2	500.314	104.25	82590000	255140000	1	F1:32040	MSB60101A.raw	P62136|PP1A_HUMAN
RIIDVVYNA	8.45	23621.3	19945.7	15263.1	28748.4	14741.2	34.4	1061.59	9	0.6	531.801	65.06	2330500	10146000	2	F2:18846	MSB60102A.raw	P62241|RS8_HUMAN
ASFNDTFVHV	75.37	16421.5	28263.8	16197	19119.3	16247.1	49.27	1135.53	10	-0.1	568.772	74.98	1430200	9506700	2	F2:21701	MSB60102A.raw	P62263|RS14_HUMAN
VQIGDIVTV	3.93	13305.1	29556.7	11910.1	14829.6	8343.92	32.82	942.539	9	-0.5	472.276	93.21	163500000	507930000	1	F1:28026	MSB60101A.raw	P62280|RS11_HUMAN
FILPDSLPLDTL	69.78	23699.1	14818.5	18217.2	8141.93	19958.4	46.77	1342.74	12	-1.9	672.375	113.73	448040000	777810000	2	F2:35417	MSB60102A.raw	P62314|SMD1_HUMAN
VLKVFLENV	120.69	24720	34821	17924.5	25399.7	20641	41.04	1059.63	9	0.8	530.824	85.7	5996400	3767200	1	F1:25306	MSB60101A.raw	P62805|H4_HUMAN
FVNDIFERI	8.47	9658.61	23526.1	3670.8	8977.86	3097.86	42.54	1151.6	9	-0.4	576.806	95.37	33851000	103190000	2	F2:28338	MSB60102A.raw	P62807|H2B1C_HUMAN:Q16778|H2B2E_HUMAN:P33778|H2B1B_HUMAN:Q99879|H2B1M_HUMAN:Q93079|H2B1H_HUMAN:P58876|H2B1D_HUMAN:P23527|H2B1O_HUMAN:Q5QNW6|H2B2F_HUMAN:Q99880|H2B1L_HUMAN:Q99877|H2B1N_HUMAN:Q8N257|H2B3B_HUMAN:O60814|H2B1K_HUMAN:P06899|H2B1J_HUMAN:P57053|H2BFS_HUMAN
FVIRNIVEA	6.6	30224.9	13377	12148.6	12368	7070.77	37.08	1059.61	9	-0.1	530.811	74.3	6673700	22806000	2	F2:21473	MSB60102A.raw	P62854|RS26_HUMAN:Q5JNZ5|RS26L_HUMAN
STLHLVLRL	188.14	8952.06	15665.3	18438.7	13069.1	9855.7	43.38	1050.65	9	-0.3	351.226	79.1	52783000	7731200	2	F2:22961	MSB60102A.raw	P62987|RL40_HUMAN:P62979|RS27A_HUMAN:P0CG47|UBB_HUMAN:P0CG48|UBC_HUMAN
FVVDEVSNI	10.42	23161.9	20868.2	10794.5	6712.19	6320.79	24.84	1020.51	9	1.6	511.264	84.55		1767500	2	F2:24886	MSB60102A.raw	P63172|DYLT1_HUMAN
AIISELVSI	9.68	16528.6	14619.5	17077.1	11319.2	17431	26.25	943.559	9	0.8	472.787	108.31		6210300	2	F2:33237	MSB60102A.raw	P78344|IF4G2_HUMAN
KQVEEIFNL	3.5	4073.52	29659.2	18925.8	17449.7	5113.17	37.2	1118.6	9	0.1	560.306	81.65	8452500	9416300	2	F2:23758	MSB60102A.raw	P78347|GTF2I_HUMAN
KVPEIEVTV	34.26	14142.2	26524	17988.8	615.46	8977.57	28.03	1012.58	9	0.5	507.298	67.84	0	3295000	2	F2:19566	MSB60102A.raw	P78347|GTF2I_HUMAN
LIWPWFERL	57.86	5555.72	16809.8	7530.83	10966.6	8604.39	37.2	1258.69	9	-0.6	630.35	112.1	17843000	28268000	2	F2:34779	MSB60102A.raw	P78417|GSTO1_HUMAN
GVIQDFINA	56.32	39356.8	29069.3	29478.8	37747.3	34312	39.43	975.503	9	-0.5	488.758	102.05	4120500	6063400	2	F2:30696	MSB60102A.raw	P78527|PRKDC_HUMAN
SVIEQIVYV	2.42	19371.2	21059	9520.41	6234.19	2348.36	31.79	1048.58	9	-1.2	525.297	101.94		7060200	2	F2:30650	MSB60102A.raw	Q00653|NFKB2_HUMAN
KIFDEILVNA	54.82	31707.8	30524	24978.4	34688.2	27941.2	15.5	1160.64	10	-1	581.329	88.22		4900600	2	F2:26243	MSB60102A.raw	Q02880|TOP2B_HUMAN:P11388|TOP2A_HUMAN
AVFPDDMPTL	84.16	10194.4	16106.7	22580.4	2301.82	9350.54	25.14	1104.52	10	-2.6	553.264	106.24		4626000	2	F2:32356	MSB60102A.raw	Q03164|KMT2A_HUMAN
GVIDLIFEKA	33.7	39669.7	34605.4	28584.6	43783.8	37243.5	38.78	1103.62	10	1	552.819	106.42	0	4556400	2	F2:32440	MSB60102A.raw	Q04637|IF4G1_HUMAN
LTAPALALA	31.63	26961.5	16102.3	12540	15509.7	17540.2	19.48	839.512	9	-0.3	420.763	83.78	4522000	8633600	2	F2:24570	MSB60102A.raw	Q06481|APLP2_HUMAN
NVIDNLIVA	49.86	37244.2	19990.2	18987.1	23312.8	13079.9	31.67	969.549	9	-0.6	485.782	99.08	26326000	105340000	1	F1:30237	MSB60101A.raw	Q12905|ILF2_HUMAN
STVKVLIRL	192.59	14314	18297.6	22947.4	14448.5	15284.4	15.48	1027.68	9	-0.4	514.845	66.22		307770	2	F2:19162	MSB60102A.raw	Q12905|ILF2_HUMAN
SLFPGKLEV	12.35	20001.2	13723.6	7450.67	2855.08	2339.66	26.63	988.559	9	-0.4	495.287	83.73		4064100	2	F2:24455	MSB60102A.raw	Q13045|FLII_HUMAN
ILLKDILSV	7.02	16931	24927.1	9168.6	14037.1	11437.8	24.96	1012.65	9	0.6	507.334	105.8	5276300	6759700	2	F2:32122	MSB60102A.raw	Q13315|ATM_HUMAN
FALPGLLHA	17.31	34011.1	15923	4202.27	15590.9	8566.12	34.03	937.538	9	0.4	469.777	98.14	157070000	674620000	2	F2:29381	MSB60102A.raw	Q13751|LAMB3_HUMAN
FLQEGDLISA	23.18	36216.2	24746	22359.4	26941.6	25069.1	27.06	1091.55	10	0.5	546.783	86.62		6248900	2	F2:25395	MSB60102A.raw	Q13868|EXOS2_HUMAN
GQISEVVVV	15.96	25350.6	33957.4	22516	27723.2	15498.6	32.42	928.523	9	-0.3	465.269	74.01		20772000	2	F2:21454	MSB60102A.raw	Q14011|CIRBP_HUMAN
TILRLLQQV	21.8	23719.4	22830.8	11880.5	24492.4	23368.1	33.5	1082.68	9	0.1	542.348	95.61	15508000	27964000	2	F2:28446	MSB60102A.raw	Q14152|EIF3A_HUMAN
IITKDLFQV	10.28	19945	30521.3	11870.9	26226	21133.2	29.46	1075.63	9	-0.4	538.821	82.49		6272900	2	F2:24092	MSB60102A.raw	Q14204|DYHC1_HUMAN
FAISILQQL	16	12281.9	8445.93	5804.65	2138.22	796.52	30.97	1031.6	9	-0.1	516.808	110.65	10653000	17207000	2	F2:34195	MSB60102A.raw	Q14240|IF4A2_HUMAN
NVVEQFLQA	120.66	37139.2	23832.5	17858.8	30520.6	18878	38.6	1046.54	9	-1.3	524.276	102.2	2629400	9759700	2	F2:30821	MSB60102A.raw	Q14258|TRI25_HUMAN
YLDPSVLSGV	8.75	19432.5	19175.8	17343.9	3790.39	9603.9	38.56	1048.54	10	-0.5	525.279	94.36		33545000	2	F2:27982	MSB60102A.raw	Q15041|AR6P1_HUMAN
ITLEDLEQL	45.8	16621.7	30117.5	21785.6	12385	13657.9	35.78	1072.57	9	-0.6	537.29	109.06	9618100	46265000	2	F2:33525	MSB60102A.raw	Q15121|PEA15_HUMAN
ITVEKIIKI	233.13	11374.9	30169.7	13345.9	9548.26	11107.5	27.92	1055.7	9	-0.9	528.855	70.11	1066500	1542000	1	F1:20391	MSB60101A.raw	Q15149|PLEC_HUMAN
HLYFETVTI	262.33	10428.8	16007.1	5016.67	6585.94	5422.52	32.3	1121.58	9	-2.7	561.794	90.08		3378300	2	F2:26585	MSB60102A.raw	Q15155|NOMO1_HUMAN:P69849|NOMO3_HUMAN:Q5JPE7|NOMO2_HUMAN
SLAQYLINV	4.57	22807	26028.5	15633.2	10281.8	9509.08	35.89	1019.57	9	3	510.791	107.84		30523000	2	F2:33045	MSB60102A.raw	Q15366|PCBP2_HUMAN
GQWASVIRV	6.74	20619.8	33447.3	14955.1	33820.7	17514.4	31.71	1014.56	9	-0.7	508.287	75.91		1761400	2	F2:22060	MSB60102A.raw	Q15393|SF3B3_HUMAN
VQVEDIVFL	9.25	13969.4	31349	21710	11681.1	4290.71	37.06	1060.58	9	0.2	531.298	110.75	994540	8353900	2	F2:34237	MSB60102A.raw	Q15543|TAF13_HUMAN
FVFPGELLL	8.64	7698.9	11158.9	3294.15	1186.55	524.75	29.64	1033.58	9	-0.9	517.799	115.54	44880000	123190000	1	F1:36541	MSB60101A.raw	Q15758|AAAT_HUMAN
IQHDLIFSL	9.39	5609	16682.3	9592.37	8276.04	712.06	29.81	1084.59	9	-1.1	543.303	96.48	2097900	12727000	2	F2:28717	MSB60102A.raw	Q16665|HIF1A_HUMAN
SLLDKIIGA	14.74	35635.9	28784.2	25608	23635.8	16466.9	22.9	928.559	9	0.8	465.287	96.24		16738000	2	F2:28631	MSB60102A.raw	Q6NZI2|CAVN1_HUMAN
YLLPKDIKL	17.58	8168.31	16100.6	14577.6	1811.23	1110.65	30.26	1101.68	9	-0.7	368.234	77.6	6844200	16893000	2	F2:22505	MSB60102A.raw	Q6T310|RSLBA_HUMAN
YIPTELDQV	20.15	20048.7	32164	22974.5	1418.64	10680.5	32.84	1076.54	9	-1	539.276	80.64		1747600	2	F2:23508	MSB60102A.raw	Q7L2H7|EIF3M_HUMAN
GIYTGFIKV	14.73	29264	29318.8	16726.5	25440.7	20745.3	26	996.564	9	-0.9	499.289	84.07	3701100	7749000	1	F1:24791	MSB60101A.raw	Q86WH2|RASF3_HUMAN
VLIPKLPQL	12.45	4180.82	12507.7	17170.8	1173.56	1070.83	22.22	1019.67	9	-0.8	510.844	96.7	30179000	33830000	2	F2:28856	MSB60102A.raw	Q8N138|ORML3_HUMAN
TLIEDILGV	3.46	28150	30697.5	14173.9	15659.1	10583.9	38.4	971.554	9	-0.5	486.784	114.45	16845000	80692000	1	F1:36166	MSB60101A.raw	Q8TEL6|TP4AP_HUMAN
SLIADLEQL	17.27	17189.4	21876	27077.2	8142.01	9741.52	30.07	1000.54	9	0.3	501.279	111	583190	2430500	2	F2:34359	MSB60102A.raw	Q8WUP2|FBLI1_HUMAN
TTYEGIFKTL	97.3	1671.89	17101.3	18433.3	7550.01	4970.31	35.23	1171.61	10	-1.4	586.813	87.39	0	1310700	2	F2:25616	MSB60102A.raw	Q8WWM7|ATX2L_HUMAN
SLINVGLISV	7.95	29804.7	20667.1	18653.8	22602.4	24213.3	32.19	1013.61	10	-0.1	507.813	110.11	4478400	5424900	1	F1:34520	MSB60101A.raw	Q92688|AN32B_HUMAN
YLLPAIVHI	3.72	2498.64	23101.1	4862.75	4219.95	2483.65	35.4	1037.63	9	0	519.821	104.92	34539000	127640000	2	F2:31762	MSB60102A.raw	Q92841|DDX17_HUMAN:P17844|DDX5_HUMAN
YVDDFGVSV	6.78	26225.2	12121.9	11832.8	2328.07	2871.62	27	999.455	9	-1	500.734	86.44	1765000	2603000	2	F2:25313	MSB60102A.raw	Q93063|EXT2_HUMAN
YLGQVAILL	133.84	9058.07	25073.9	20454.2	9023.24	8774.84	29.33	988.596	9	-0.5	495.305	109.63	31723000	20167000	2	F2:33755	MSB60102A.raw	Q96FJ2|DYL2_HUMAN:P63167|DYL1_HUMAN
TAIDILTTV	7.26	23974.5	14388.5	3373.17	6151.31	4545.33	22.2	945.538	9	0	473.776	102.38	0	1710600	2	F2:30951	MSB60102A.raw	Q96P70|IPO9_HUMAN
GVVARLLAL	97.73	26867.4	1117.58	27459.6	8947.41	9443.97	13.25	910.596	9	-0.8	456.305	87.26		6467400	2	F2:25560	MSB60102A.raw	Q99536|VAT1_HUMAN
SQYPEIIFL	8.39	8030.29	25951.4	13631.8	4308.62	710.67	28.93	1108.58	9	0.6	555.298	111.69	6741600	13623000	2	F2:34650	MSB60102A.raw	Q9BQ52|RNZ2_HUMAN
FANDGSFLEL	104.49	21300.5	7819.12	7874.22	2300.47	2532.93	40.25	1111.52	10	0.5	556.767	106.95	13647000	37042000	2	F2:32609	MSB60102A.raw	Q9BQ61|TRIR_HUMAN
RAADVLVYL	13.39	9984.93	2518.29	8052.3	1614.5	990.34	22.07	1018.58	9	0.5	510.298	87.34		4267700	2	F2:25562	MSB60102A.raw	Q9BZ68|FR8P1_HUMAN:Q9BZ67|FRMD8_HUMAN
LLWPWFERL	25.55	3804.52	20810.8	7217.95	9594.97	5966.2	37.2	1258.69	9	-0.6	630.35	112.1	17843000	28268000	2	F2:34779	MSB60102A.raw	Q9H4Y5|GSTO2_HUMAN
AVIGDVIRV	8.71	31411.5	27385.4	19497.6	22171.5	18192.5	30.93	940.571	9	-0.3	471.292	75.52	7670300	6547300	1	F1:22031	MSB60101A.raw	Q9NR30|DDX21_HUMAN
ALIDALRDNETL	145.29	30957.3	28265	35911.5	24097.5	25764.8	46.89	1342.71	12	-0.5	672.362	89.24	16442000	4701400	1	F1:26602	MSB60101A.raw	Q9NYL9|TMOD3_HUMAN
NLLAHFINA	41.55	29989	27370.6	15782.5	29103.6	18806	35.73	1011.55	9	-0.1	506.782	89.26	493080	4486500	2	F2:26272	MSB60102A.raw	Q9NZJ7|MTCH1_HUMAN
VQVDGKIGL	125.7	30903.8	24194	30379.6	14179.7	12927.2	24.73	927.539	9	0.9	464.777	53.45		12840000	2	F2:15272	MSB60102A.raw	Q9NZJ7|MTCH1_HUMAN
YQAPDIDVQL	36.38	17379.1	20779.2	20409.4	956.09	5036.14	35.85	1160.57	10	1.1	581.294	92.35		24465000	2	F2:27248	MSB60102A.raw	Q9NZM5|NOP53_HUMAN
SQHGVIIQL	31.33	14762.2	17158.2	18698.2	13125.5	1873.4	15.37	993.561	9	-1	497.787	67.39		967190	2	F2:19512	MSB60102A.raw	Q9P2R3|ANFY1_HUMAN
TVTTVILEV	35.73	28244.3	22401.8	9981.9	18613.1	11238.9	31.41	973.57	9	-0.8	487.792	96.75	17398000	36021000	1	F1:29410	MSB60101A.raw	Q9UKF6|CPSF3_HUMAN
SLNVADLTSL	230.09	27162.9	10488.5	30459.6	10335	22991.9	47.45	1031.55	10	-0.6	516.782	105.39	30061000	47632000	1	F1:32671	MSB60101A.raw	Q9UL46|PSME2_HUMAN
LQIQQGLQTL	184.18	16095.4	12200.4	24101.2	14437.9	16012.2	34.73	1140.65	10	0.1	571.332	83.76	2402000	2976600	2	F2:24491	MSB60102A.raw	Q9UMX0|UBQL1_HUMAN:Q9NRR5|UBQL4_HUMAN
TQTPWLPVL	34.16	6236.82	15989	13294.2	7215.76	1722.19	29.58	1053.59	9	-3	527.799	110.35	4608300	5151800	1	F1:34588	MSB60101A.raw	Q9UNE0|EDAR_HUMAN
SYIEHIFEI	82.86	7.05	21264.6	9747.11	4995.92	31.28	41.36	1149.57	9	-1	575.792	104.07		86891000	2	F2:31686	MSB60102A.raw	Q15121|PEA15_HUMAN
SYIPLFPQL	1806.89	24.29	19803.8	19003.2	3661.24	73.54	28.24	1076.59	9	-0.3	539.302	111.43		10546000	2	F2:34551	MSB60102A.raw	B0YJ81|HACD1_HUMAN
KYMDVQFDF	5175.79	5.79	25674.3	20468.4	20803.3	195.98	37.65	1191.53	9	-1.8	596.77	92.13		37129000	2	F2:27447	MSB60102A.raw	O00159|MYO1C_HUMAN
VYISSLALL	3382.97	14.8	21386.9	22853.7	3299.25	125.69	26.63	977.58	9	-0.2	489.797	109.42	950440	6062300	2	F2:33698	MSB60102A.raw	O00487|PSDE_HUMAN
VYVQNVVKL	13692.3	72.86	29362.6	30351.4	7321.93	199.16	32.32	1060.63	9	0.2	531.321	69.26	1097400	1560700	1	F1:20110	MSB60101A.raw	O14617|AP3D1_HUMAN
AYLHTTTTF	14102.3	13.57	19179.2	30003	11395.9	305.21	33.68	1053.51	9	-0.3	527.764	53.31	12214000	9101400	1	F1:15268	MSB60101A.raw	O15438|MRP3_HUMAN
TYPDVNNSI	12586.9	165.3	25116	25408.5	1512.92	445.4	30.87	1021.47	9	0.3	511.743	54.89	1889600	3189700	1	F1:15559	MSB60101A.raw	O75436|VP26A_HUMAN
AYSRVQYQF	18877.5	10.39	28227.1	29235.5	26801.2	380.81	31.98	1160.56	9	-0.9	581.288	54.06		1237200	2	F2:15385	MSB60102A.raw	O75815|BCAR3_HUMAN
YYFEGIKQTF	6772.75	7.74	22362.1	21113.8	12884.8	49.82	44.66	1294.62	10	-0.5	648.319	83.32		7121900	2	F2:24308	MSB60102A.raw	O95433|AHSA1_HUMAN
VYISEHEHF	22984.9	10.33	33149.3	29822.7	18468.8	254.59	38.89	1159.53	9	0.5	580.773	42.07	686310	7106100	2	F2:11768	MSB60102A.raw	O96005|CLPT1_HUMAN
NYLSIFRKF	24419.9	13.26	31769	27841.6	27846.1	189.96	43.39	1186.65	9	-0.5	396.557	87.79	5185000	38238000	1	F1:26221	MSB60101A.raw	P07384|CAN1_HUMAN
NYKKFYEQF	34189.3	27.28	35783.9	34367	29112.4	301.66	41.12	1265.61	9	0.1	422.877	59.31	20063000	25162000	2	F2:17084	MSB60102A.raw	P07900|HS90A_HUMAN
LYPSIIQEF	13784.1	9.15	27478.9	28909	2865.66	46.74	40.46	1108.58	9	-0.2	555.297	108.26	6715000	41095000	2	F2:33220	MSB60102A.raw	P09884|DPOLA_HUMAN
YYEKLHTYF	13924.9	29.1	21348.5	29100.1	12665.3	61.55	45.6	1262.6	9	-0.1	632.306	62.16	2745000	9760700	2	F2:17944	MSB60102A.raw	P16144|ITB4_HUMAN
KYPDIISRI	7519.19	24.28	29888	25303.4	2343.38	425.29	24.15	1103.63	9	-1.9	552.823	67.86		2692200	2	F2:19677	MSB60102A.raw	P18858|DNLI1_HUMAN
VYDGKFAIF	17275	41.37	22094.4	32589.9	8168.4	146.62	32.07	1058.54	9	-0.4	530.279	86.25		2919100	2	F2:25312	MSB60102A.raw	P21860|ERBB3_HUMAN
RYLPDTLLL	4225.89	16.22	18403.4	19054.8	6578.68	172.77	28.06	1102.64	9	-1	552.326	95.22	2018800	19382000	2	F2:28329	MSB60102A.raw	P21964|COMT_HUMAN
FYPPKVELF	11585.8	15.34	28451.9	29855	1672.41	43.42	35.34	1138.61	9	0.4	570.311	94.3	63064000	138160000	2	F2:27985	MSB60102A.raw	P22234|PUR6_HUMAN
FFYPLDFTF	661.88	22.14	19861.3	6812.36	9635.75	127.53	43.78	1195.56	9	-0.6	598.786	116.68	17570000	29669000	1	F1:36995	MSB60101A.raw	P32119|PRDX2_HUMAN:Q06830|PRDX1_HUMAN:Q13162|PRDX4_HUMAN:P30048|PRDX3_HUMAN
EYYDKHFTEF	21871.3	38.97	25446.5	28734.7	19021	361.54	35.45	1377.59	10	-0.5	689.801	61.67		1602900	2	F2:17742	MSB60102A.raw	P38606|VATA_HUMAN
LYTEKFEEF	21483.2	20.12	33263.6	30675.6	13862.9	203.67	39.35	1204.57	9	-0.1	603.29	75.04	6808300	15719000	2	F2:21726	MSB60102A.raw	P40222|TXLNA_HUMAN
IYKPVTDFF	21725.1	9.07	28294.4	25448.1	16881.8	84.39	31.11	1128.59	9	-0.1	565.3	87.68		2142600	2	F2:25816	MSB60102A.raw	P42704|LPPRC_HUMAN
RWFDKSFTF	2447.93	5.43	19049.1	15444.7	10678.9	212.72	44.5	1232.6	9	0.4	617.306	85.6	4723400	27633000	2	F2:25195	MSB60102A.raw	P50416|CPT1A_HUMAN
LYRLKFNEF	31665.7	147.11	19109.8	34300.9	15847.6	346.58	37.71	1228.66	9	-0.4	615.337	76.22		2106200	2	F2:22124	MSB60102A.raw	P56559|ARL4C_HUMAN
RYPDRITLI	9020.51	15.51	21578.2	25370.3	827.99	151.71	27.09	1145.66	9	-1.7	573.834	64.8	1096300	4717300	1	F1:18802	MSB60101A.raw	P60510|PP4C_HUMAN
KYPENFFLL	1252.17	5.26	23531	21942.4	571.17	58.33	34.62	1169.61	9	0.3	585.813	106.69	26416000	126930000	2	F2:32377	MSB60102A.raw	P62136|PP1A_HUMAN:P36873|PP1G_HUMAN:P62140|PP1B_HUMAN
NYIKDLNIL	13667.2	152.07	27091.3	30753.3	18797.6	477.93	29.7	1104.62	9	-1.1	553.316	87.62	8451200	5450300	1	F1:26052	MSB60101A.raw	Q05D32|CTSL2_HUMAN
KYPSPFFVF	10925.2	4.65	23502.2	27193.5	2208.55	97.45	33.9	1130.58	9	-0.5	566.297	107.23	82635000	192480000	2	F2:32858	MSB60102A.raw	Q08211|DHX9_HUMAN
KFIDNTLYF	2988.59	22.71	21115.1	24072.5	6711.76	120.81	39.35	1159.59	9	-0.7	580.803	89.46	3046200	7757300	2	F2:26242	MSB60102A.raw	Q14116|IL18_HUMAN
RYKLYQEMF	30355.6	26.19	29802.7	34147.9	25675.2	496.63	35.69	1276.63	9	2.9	639.323	71.07		333020	2	F2:20582	MSB60102A.raw	Q14204|DYHC1_HUMAN
VFYPYPQYF	7292.76	12.59	23426.6	16525.4	3005.78	32.6	37.91	1222.57	9	-0.1	612.292	107.27		27586000	2	F2:32799	MSB60102A.raw	Q3SXM5|HSDL1_HUMAN
LYGRNFNYL	13843.3	33.05	23633.3	28830.6	6675.26	370.5	25.59	1158.58	9	-0.4	580.298	73.51		461600	2	F2:21289	MSB60102A.raw	Q5XG87|PAPD7_HUMAN
TYQRWQFTL	6177.19	6.49	17436.7	14507.5	10727.2	141.31	36.77	1241.62	9	-0.2	621.817	88.61	8873200	22659000	2	F2:25995	MSB60102A.raw	Q6P2Q9|PRP8_HUMAN
LYPEVFEKF	13660.1	7.94	34128.3	28178.6	7220.13	237.07	35	1170.6	9	-0.1	586.305	92.19		15964000	2	F2:27361	MSB60102A.raw	Q6PL18|ATAD2_HUMAN
IYKSIMEQF	27045.6	15.23	34086.7	30938.2	27590.6	195.52	28.88	1157.58	9	-0.8	579.796	77.13		1660900	2	F2:22447	MSB60102A.raw	Q6UXY1|BI2L2_HUMAN
SYIPIFPQL	1442.3	20.98	20166.8	18370.4	3053.93	59.75	28.24	1076.59	9	-0.3	539.302	111.43		10546000	2	F2:34551	MSB60102A.raw	Q6Y1H2|HACD2_HUMAN
NYSPYVNYF	17407.1	13.51	28613.4	24434.7	10355.3	26.17	30.8	1165.51	9	-3.3	583.759	93.14		4602700	2	F2:27620	MSB60102A.raw	Q7Z388|D19L4_HUMAN
YYQNYFEKL	6832.14	12.64	25752.2	22369.3	4157.31	34.64	41.13	1266.59	9	-0.6	634.303	78.98	539010	1884000	2	F2:22971	MSB60102A.raw	Q86TB9|PATL1_HUMAN
GYRAFSLSF	21997.8	106.59	14247.4	32079.8	20473.3	461.38	27.1	1046.52	9	-3.3	524.265	89.24	3890400	417390	1	F1:26605	MSB60101A.raw	Q86W42|THOC6_HUMAN
TYMKDLYQL	2561.01	10.06	19375.4	22294.5	12639	238.54	37.94	1173.57	9	-0.7	587.794	79.24		10742000	2	F2:23070	MSB60102A.raw	Q8N392|RHG18_HUMAN
KYNDNFFGL	2041.21	54.91	25749.7	27453.4	7974.7	155.74	35.69	1116.52	9	-0.9	559.269	89.53	982770	6542000	2	F2:26327	MSB60102A.raw	Q8N806|UBR7_HUMAN
IYAPPLPSL	3446.55	69.68	9956.77	21932.5	865.05	70.67	29.43	969.553	9	0.2	485.784	102.05	13955000	21923000	2	F2:30804	MSB60102A.raw	Q92667|AKAP1_HUMAN
FYPAIADLF	7310.93	11.89	26920.3	23362.3	4045.67	90.15	37.56	1055.53	9	-0.1	528.774	113.83	39592000	18178000	2	F2:35459	MSB60102A.raw	Q92791|SC65_HUMAN
SYGDILHVI	6647.51	16.99	26470.9	20529.6	12822.3	426.41	39.32	1015.53	9	-0.6	508.774	92.74	0	11318000	2	F2:27564	MSB60102A.raw	Q92796|DLG3_HUMAN
IYKWITDNF	27214.7	11.83	30842	28326.6	23655.8	374.29	37.95	1198.6	9	-0.4	600.308	92.41		6004500	2	F2:27453	MSB60102A.raw	Q92949|FOXJ1_HUMAN
SYQKVIELF	15331.6	4.4	29762.1	26857.5	23370.9	233.77	35.47	1125.61	9	-0.8	563.81	88.56	49589000	108440000	2	F2:26269	MSB60102A.raw	Q96KB5|TOPK_HUMAN
VYPGDPLRF	30421.1	47.45	35005.3	35882.7	11022.2	400.6	22.99	1062.55	9	-1.3	532.282	77.78	0	5915200	2	F2:22565	MSB60102A.raw	Q9BSV6|SEN34_HUMAN
SYMGHFDLL	2139.49	11.02	13464	18686.3	3695.83	77.25	36.28	1081.49	9	-0.6	541.752	92.48		15908000	2	F2:27520	MSB60102A.raw	Q9BWJ5|SF3B5_HUMAN
SFITSSWTF	4634.42	11.43	21889.3	21841.3	12924.1	304.9	34.54	1074.5	9	-0.6	538.258	109.84	2275500	6797800	2	F2:33882	MSB60102A.raw	Q9BXS4|TMM59_HUMAN
YYIFIPSKF	12308.6	6.55	25476.2	21595.7	15468.8	54.7	38.32	1176.62	9	0.2	589.318	103.13	68055000	151300000	2	F2:31346	MSB60102A.raw	Q9H0S4|DDX47_HUMAN
VYVVGTAHF	19096.3	13.6	25764.5	29897.3	13135.7	230.8	36.47	991.513	9	0.3	496.764	62.45	15809000	31172000	2	F2:17955	MSB60102A.raw	Q9H4I3|TRABD_HUMAN
FYQPKIQQF	16338.2	12.63	25143	26794.2	7068.17	18.18	32.64	1197.62	9	-0.1	599.816	70.91		1554100	2	F2:20570	MSB60102A.raw	Q9NVI1|FANCI_HUMAN
VYSEVAAYEF	14088.2	9.14	26605.6	26986.6	19444.1	496.25	36.08	1176.53	10	-0.7	589.274	87.68	4265400	6983800	2	F2:25767	MSB60102A.raw	Q9Y295|DRG1_HUMAN
QYAPLLAVF	14401.4	12.68	20623.8	26025.9	15750	173.39	34.83	1020.56	9	0.2	511.29	112	2970700	6615900	2	F2:34765	MSB60102A.raw	Q9Y6E2|BZW2_HUMAN
VYIGVHVPF	8727.78	14.76	19395.5	24766.6	14211.5	206.39	32.13	1029.56	9	1.2	515.79	90.48		22898000	2	F2:26679	MSB60102A.raw	Q9Y6M7|S4A7_HUMAN
LYGKIAEAF	25412.3	16.11	27886.3	30395.1	25220.9	974.79	33.63	1010.54	9	-0.2	506.279	70.54	2526600	4970700	2	F2:20387	MSB60102A.raw	O14908|GIPC1_HUMAN
VYSHLPDLL	18145.6	66.73	29506.9	24119.7	13355	758.2	23.77	1055.57	9	-0.4	528.79	84.29		1140000	2	F2:24652	MSB60102A.raw	O75509|TNR21_HUMAN
TYGEIFEKF	22331.6	6.46	36532.2	28727.5	26287.4	653.74	42.12	1132.54	9	0.1	567.279	85.38	36459000	116560000	2	F2:24920	MSB60102A.raw	O95298|NDUC2_HUMAN
EYFESPFTI	6318.26	37.07	32135.1	7574.47	19210.3	890.54	29.17	1131.51	9	-0.2	566.763	108.97	1692100	8285900	2	F2:33540	MSB60102A.raw	P00414|COX3_HUMAN
GYPLWKVTF	26436.9	51.01	32788.3	37104.3	14198.7	869.73	38.92	1109.59	9	-0.9	555.802	101.14	9635900	23831000	1	F1:30992	MSB60101A.raw	P00491|PNPH_HUMAN
EYLPIGGLAEF	2752.34	250.52	6697.32	20136.1	12644.5	7205.62	46.46	1207.61	11	-0.6	604.813	110.71		12589000	2	F2:34212	MSB60102A.raw	P00505|AATM_HUMAN
TYSPALNKMF	27707.3	46.3	29943	33652.4	12434.6	1422.45	29.9	1170.57	10	1	586.295	75.86		2509600	2	F2:22079	MSB60102A.raw	P04637|P53_HUMAN
EYPDRIMNTF	23763.8	106.24	4959.84	13287.5	17466.2	1958.97	43.4	1284.58	10	-0.2	643.298	75.96		14651000	2	F2:22115	MSB60102A.raw	P07437|TBB5_HUMAN:P68371|TBB4B_HUMAN:Q9BVA1|TBB2B_HUMAN:Q13885|TBB2A_HUMAN:Q13509|TBB3_HUMAN
IFTDLSSRF	16884.4	133.94	25487.5	25461.9	14737.6	584.95	32.31	1084.56	9	-1	543.284	78.77	5850500	3363200	2	F2:22892	MSB60102A.raw	P13010|XRCC5_HUMAN
AYSIVAGVF	25054.4	86.82	24860	32174.1	25083.2	1035.81	25.6	925.491	9	-0.5	463.752	104.02		13968000	2	F2:31470	MSB60102A.raw	P13498|CY24A_HUMAN
RYFDPANGKF	16423.8	52.65	18610.6	28121.1	18092.2	930.03	43.01	1213.59	10	-0.8	607.801	53.37	2143700	11161000	2	F2:15211	MSB60102A.raw	P13639|EF2_HUMAN
KWNPTAGVAF	22593.9	187.4	19304.7	36428.1	11103.6	6819.88	33.17	1089.56	10	0.9	545.788	74.6	8238900	13501000	2	F2:21570	MSB60102A.raw	P19387|RPB3_HUMAN
NYIGLINRI	8279.09	41.7	31970.3	18221.1	25252.8	959.54	30.9	1074.62	9	-2.1	538.315	84.38	4646500	13549000	2	F2:24661	MSB60102A.raw	P19525|E2AK2_HUMAN
TYQDIQNTI	16256.6	30.22	25991	16253	12611.7	702.67	30.91	1094.52	9	-0.5	548.269	60.89	1966700	6319300	2	F2:17628	MSB60102A.raw	P24928|RPB1_HUMAN
LYIGWDKHYGF	14258	56.09	34732.9	28790.7	35881.2	3706.92	42.68	1397.68	11	-0.6	466.899	86.49		3419600	2	F2:25369	MSB60102A.raw	P25789|PSA4_HUMAN
VYLPPEAFTF	4945.15	6.67	27212	23655.3	3659.18	839.21	35.09	1182.6	10	3.1	592.307	109.83		9699800	2	F2:33861	MSB60102A.raw	P26358|DNMT1_HUMAN
KFIDTTSKF	11079.9	70.39	19908.2	29956	11991.3	586.31	36.32	1085.58	9	0.3	543.795	44.6	5304300	12342000	2	F2:12438	MSB60102A.raw	P39023|RL3_HUMAN:Q92901|RL3L_HUMAN
PYTPFLTEL	24356.5	321.12	33605.8	34071.9	17569.8	1633.96	18.1	1079.55	9	-0.5	540.784	108.66		14590000	2	F2:33413	MSB60102A.raw	P41252|SYIC_HUMAN
IYQRDPLKL	28722.2	80.15	30538.8	32008.1	16422.6	849.46	35.79	1144.66	9	-0.6	573.337	50.81	15970000	9226100	1	F1:14473	MSB60101A.raw	P42226|STAT6_HUMAN
LYADVGGKQF	24867.3	241.58	21800.7	32044.1	22658.5	1446.62	41.36	1096.56	10	0.2	549.285	55.38	3463100	2900700	2	F2:15763	MSB60102A.raw	P51571|SSRD_HUMAN
EYLKVDAQF	25787.4	90.69	33893.9	30216.7	37377.9	4323.43	36.79	1111.55	9	-0.7	556.784	71.12	5859800	2920000	2	F2:20626	MSB60102A.raw	P54577|SYYC_HUMAN
AYVHMVTHF	14608.1	24.67	30444.8	34270.4	24474.1	740.07	40.65	1103.52	9	0.4	368.848	56.47	2202500	36611000	2	F2:16187	MSB60102A.raw	P55061|BI1_HUMAN
NYTLVSHLI	12403.3	16.01	27427.8	12715.5	19384.6	1239.19	39.98	1058.58	9	-0.5	530.295	84.79	0	7398500	2	F2:24776	MSB60102A.raw	P56192|SYMC_HUMAN
DYVEGLRVF	27366.8	493.12	30979.1	34987.9	28982.6	828.1	40.47	1096.56	9	-0.8	549.284	89.8		20011000	2	F2:26422	MSB60102A.raw	P60660|MYL6_HUMAN
RFVNVVPTF	5565.53	17.9	16239.2	23396.9	14001.5	502	32.73	1077.6	9	-1	539.805	83.75		4981200	2	F2:24489	MSB60102A.raw	P62861|RS30_HUMAN
KYAWVLDKL	8129.69	34.81	26026.2	28391.3	16618.3	1609.34	14.95	1134.64	9	1.1	379.222	80.2		348420	2	F2:23323	MSB60102A.raw	P68104|EF1A1_HUMAN:Q5VTE0|EF1A3_HUMAN:Q05639|EF1A2_HUMAN
RYLPTGSFPF	2446.92	5.65	7538.66	20709.2	1902.74	636.25	33.9	1183.6	10	-0.2	592.808	91.62	51297000	116220000	2	F2:27132	MSB60102A.raw	Q13454|TUSC3_HUMAN
KYTKIFNDF	24558.2	11.36	31732.2	34052	24223	995.39	38.75	1174.6	9	-2.1	588.307	65.22	2470900	3814800	2	F2:18773	MSB60102A.raw	Q15326|ZMY11_HUMAN
IYLPYLQNW	22397	16.45	36880.9	22037.6	25956.5	2545.18	33.21	1208.62	9	0	605.319	111.89		8566500	2	F2:34715	MSB60102A.raw	Q8IX04|UEVLD_HUMAN
TGPTRFFLF	12130.6	97.34	24383.7	18191	1591.81	1832.92	34.98	1084.57	9	-0.8	543.292	104.92	1852700	16260000	2	F2:31784	MSB60102A.raw	Q8NFJ5|RAI3_HUMAN
TYPNTYIF	25813.6	95.27	30532.2	27862.4	14470.3	828.49	22.74	1017.48	8	-0.1	509.748	90.48	1002200	3167100	2	F2:26626	MSB60102A.raw	Q8TEL6|TP4AP_HUMAN
RWSPVRPLVF	19334	16.47	13850.5	28669.8	4766.28	2270.82	40.67	1255.72	10	0.2	628.867	82.82	0	25610000	2	F2:24131	MSB60102A.raw	Q96EX3|DC2I2_HUMAN
LFAVFQTTF	15808	76.51	25808.9	22133.2	15308.1	1814.41	36.28	1072.56	9	-0.3	537.287	111.15	3534500	5361500	2	F2:34355	MSB60102A.raw	Q99650|OSMR_HUMAN
VLPSVLNKF	2467.34	105.72	28448.2	28645.6	1335.97	3207.48	28.36	1015.61	9	0.8	508.811	81.29	835810	1409200	2	F2:23702	MSB60102A.raw	Q9BTE3|MCMBP_HUMAN
QYPVIIHLI	8943.73	11.23	33361.6	21905.2	7474.33	1374.97	29.77	1094.65	9	-0.2	548.332	101.45		14937000	2	F2:30762	MSB60102A.raw	Q9BW60|ELOV1_HUMAN
PYNPIIGETF	34971.3	58.33	36607.4	36436.7	28370.8	8854.48	41.65	1149.57	10	-1	575.792	104.07	306410	86891000	2	F2:31116	MSB60102A.raw	Q9BXB4|OSB11_HUMAN:Q9BXB5|OSB10_HUMAN
EYQKVWNLF	29642.2	10.17	33108.8	31678	34468.6	3089.66	38.16	1225.61	9	-0.1	613.814	98.24	13431000	26744000	2	F2:29416	MSB60102A.raw	Q9H0J9|PAR12_HUMAN
PYNPILGETF	35543.5	56.61	36426.1	36632.8	29884.4	9599.74	41.65	1149.57	10	-1	575.792	104.07	306410	86891000	2	F2:31116	MSB60102A.raw	Q9H0X9|OSBL5_HUMAN:Q9BZF1|OSBL8_HUMAN
TYTDVTPRQFF	24324.1	105.28	31376.1	35203.2	28000.8	1838.46	28.07	1373.66	11	1	687.839	80.21		849090	2	F2:23308	MSB60102A.raw	Q9NQZ5|STAR7_HUMAN
KYITQGQLLQF	19834.6	52.91	33521.2	34868.1	34117.3	4724.64	40.61	1337.73	11	0.2	669.875	85.55		2717900	2	F2:25084	MSB60102A.raw	Q9NYP7|ELOV5_HUMAN
KYLSVQGQLF	15940.1	7.82	26799.8	28562	26531.1	2025.79	39.72	1181.64	10	-0.2	591.829	78.14	15551000	51632000	2	F2:22790	MSB60102A.raw	Q9NZJ7|MTCH1_HUMAN
IFIDPGYQTF	5268.96	24.28	19892.9	25940.5	9566.98	771.16	33.65	1199.59	10	0.1	600.8	103.6	4576900	6790600	2	F2:31251	MSB60102A.raw	Q9UBW7|ZMYM2_HUMAN
IYGYVAEQF	24200	7.28	34855.3	28972.2	25395.6	730.55	33.37	1088.52	9	-1	545.266	84.64	10054000	24921000	1	F1:25295	MSB60101A.raw	Q9Y6A9|SPCS1_HUMAN
RPYGVGLLI	7161.16	8597.32	35.86	220.95	13876.9	13207.7	18.22	986.591	9	-0.5	494.303	84.79		15382000	2	F2:24829	MSB60102A.raw	P25786|PSA1_HUMAN
LTVPFEKHSTL	4298.75	21934.6	317.83	7470.94	3760.61	16824.5	42.55	1270.69	11	-0.3	636.353	61.91	4747400	9491400	2	F2:17854	MSB60102A.raw	O95336|6PGL_HUMAN
RPRKAFLLLL	11772.4	12894.1	5.68	5179.82	22332.3	3423.4	30.89	1225.8	10	-0.8	409.608	76.87	23695000	26818000	2	F2:22281	MSB60102A.raw	P13667|PDIA4_HUMAN
GPLPRTVELF	14832.5	3685.41	317.38	10500.5	21870.8	24663.9	36.64	1127.63	10	0.3	564.824	86.7	38154000	8670700	1	F1:25643	MSB60101A.raw	Q9Y2Q3|GSTK1_HUMAN
FPQFYPLGI	5744.05	17953.4	315.65	163.53	16880.2	12012.7	28.06	1080.56	9	-0.7	541.289	111.74	2261300	10540000	2	F2:34620	MSB60102A.raw	P35244|RFA3_HUMAN
VPYIGIVTI	12283.1	19867.7	446.18	375.16	15339.5	20275.1	24.53	973.585	9	-0.7	487.799	108.26	2479500	15357000	2	F2:33199	MSB60102A.raw	P67812|SC11A_HUMAN
HPSLIPLFV	6992.78	26317.8	615.55	203.07	29487.7	13382.2	26.69	1021.6	9	0.4	511.805	106.4		19030000	2	F2:32392	MSB60102A.raw	O00483|NDUA4_HUMAN
YVPPELITL	27.38	3878.59	13445.3	20622.7	18.65	687.65	28.41	1043.59	9	-1	522.802	106.81	11628000	34507000	2	F2:32521	MSB60102A.raw	P49770|EI2BB_HUMAN
SIPDVNVNL	182.84	15237.9	16230	30351.4	65.46	3109.62	20.96	969.513	9	0.6	485.764	84.6		3080700	2	F2:24628	MSB60102A.raw	Q09666|AHNK_HUMAN
RVAPEEHPVL	2273.75	15916.3	2256.3	25821.2	315.4	11411.7	34.95	1145.62	10	0	573.817	32	3813500	1765200	1	F1:8789	MSB60101A.raw	P60709|ACTB_HUMAN:P63261|ACTG_HUMAN:A5A3E0|POTEF_HUMAN
FSPLHALNF	7725.69	854.04	21274	22012.6	160.25	567.08	41.21	1044.54	9	0.2	523.277	93.5	52589000	40061000	2	F2:27801	MSB60102A.raw	P68402|PA1B2_HUMAN:Q15102|PA1B3_HUMAN
TYTDRVFFL	4772.16	63.49	26384.6	24681.8	6691.31	42.72	36.08	1160.59	9	-0.9	581.3	96.75	1897800	3414700	2	F2:28904	MSB60102A.raw	O15031|PLXB2_HUMAN
YYTDIMHTL	569.05	22.75	13923.4	16397.7	1816.87	12.3	28.95	1155.53	9	-1	578.77	82.66		7636300	2	F2:24094	MSB60102A.raw	O15031|PLXB2_HUMAN
YYDKHFTEF	3891.41	22.7	8827.03	22660.5	2986.04	20.6	42.51	1248.55	9	-1.5	625.279	54.33		11201000	2	F2:15544	MSB60102A.raw	P38606|VATA_HUMAN
VYIKHPVSL	10657.5	45.15	10945.2	26024	1746.53	30.49	36.98	1054.62	9	-0.9	528.316	44.62	344310	2568900	2	F2:12536	MSB60102A.raw	P48556|PSMD8_HUMAN
FKFPNRLNL	6591.58	25402.4	13268	14975.4	8095.46	154.31	33.26	1147.65	9	0.3	383.557	76.88	3785100	848640	1	F1:22458	MSB60101A.raw	P09382|LEG1_HUMAN
YRPPELLL	24728	14695.3	25717.4	31338.5	13585.1	364.28	22.5	999.575	8	0.2	500.795	82.02	4339400	4797400	2	F2:23931	MSB60102A.raw	Q9NYV4|CDK12_HUMAN:Q14004|CDK13_HUMAN:P50750|CDK9_HUMAN
YRFLPQKIIYL	771.36	9225.62	27696.2	28223.8	1484.09	411.29	52.64	1452.85	11	-1	727.431	94.12	588490000	388490000	1	F1:28494	MSB60101A.raw	Q9UL46|PSME2_HUMAN
IRDNFVIVY	26105.2	29463.2	37641.3	34342.1	38246.4	194.77	31.91	1137.62	9	0.3	569.817	82.3	8671100	5928800	2	F2:24023	MSB60102A.raw	Q9Y6Q5|AP1M2_HUMAN
YLPDSLTQL	7.61	6382.85	14317.5	26851.4	10.97	225.49	29.59	1048.54	9	0.2	525.279	100.4		1546800	2	F2:27737	MSB66429A.raw	Q9BTT6|LRRC1_HUMAN
FLPSYIIDV	4.59	11713	30026	16183.4	263.26	1532.06	35.61	1065.57	9	-0.6	533.794	109.23	5921300	3384800	1	F1:32273	MSB66428A.raw	Q10570|CPSF1_HUMAN
LLIENVASL	12.02	10977.1	6921.95	15773.5	438.81	1117.47	34.89	970.57	9	-0.7	486.292	105.84	0	43950000	2	F2:29670	MSB66429A.raw	P07203|GPX1_HUMAN
VLIENVASL	20.5	7451.64	8707.98	19363.5	285.53	926.53	41.72	956.554	9	0.6	479.285	96.25	142310000	75244000	2	F2:26586	MSB66429A.raw	P18283|GPX2_HUMAN
YLQASYTYL	12.5	2183.31	6969.22	17120.2	350.1	625.34	36.66	1120.54	9	-1.1	561.279	89.97		1495600	2	F2:24835	MSB66429A.raw	P02792|FRIL_HUMAN
FAYDGKDYL	29.94	24797.7	8585.88	4396.64	538.41	380.84	40.54	1090.5	9	0.2	546.256	72.56	509720	528330	4	F4:20049	MSB66431A.raw	P13747|HLAE_HUMAN
FQIVNPHLL	15.82	2501.56	20512.5	10474.3	2673.53	418.92	37.98	1079.61	9	0.5	540.814	96.14	0	3810600	2	F2:26459	MSB66429A.raw	P23921|RIR1_HUMAN
SLIGHLQTL	9.12	4721.98	4174.26	19050.5	515.36	488.29	30.26	980.566	9	-0.2	491.29	82.43		771880	4	F4:22659	MSB66431A.raw	Q16690|DUS5_HUMAN
YQDPVTLQL	9.8	8260.83	10551	11351.3	1845.82	343.23	25.17	1075.55	9	1	538.785	95.99	885790	1198200	3	F3:26476	MSB66430A.raw	P07942|LAMB1_HUMAN
YQTEIGQTL	12.47	6919.26	10113	13902.5	1571.01	393.6	29.78	1051.52	9	0.1	526.767	64.46	0	170960	2	F2:17744	MSB66429A.raw	P14324|FPPS_HUMAN
ALIDALRDNETL	145.29	30957.3	28265	35911.5	24097.5	25764.8	51.29	1342.71	12	-0.1	672.362	92.9	2445600	428150	1	F1:25907	MSB66428A.raw	Q9NYL9|TMOD3_HUMAN
ALPDDLVEV	5.46	22591.7	32168.1	30086.5	830.56	6045.01	30.73	969.502	9	-0.2	485.758	93.88	218710	230140	4	F4:25758	MSB66431A.raw	Q14651|PLSI_HUMAN
ALVVQVAEA	246.34	41172.7	27819	33262.2	30500.8	31384.3	32.75	898.512	9	-1.1	450.263	66.14	540510	3870400	2	F2:18226	MSB66429A.raw	P07686|HEXB_HUMAN
AQIKEMVEL	14.37	14438.5	22686.5	30225.2	14153.6	8562.97	37.51	1059.56	9	0.3	530.789	73.65	493520	1195900	1	F1:20439	MSB66428A.raw	P55072|TERA_HUMAN
ASFNDTFVHV	75.37	16421.5	28263.8	16197	19119.3	16247.1	57.78	1135.53	10	-0.6	568.772	77.46	1388700	414150	4	F4:21319	MSB66431A.raw	P62263|RS14_HUMAN
AVIDVGINRV	33.99	36200.6	27938.8	25533.1	30923.8	29743.5	35.24	1054.61	10	-0.3	528.314	68.45	190150	348190	2	F2:18892	MSB66429A.raw	P13995|MTDC_HUMAN
AVIGDVIRV	8.71	31411.5	27385.4	19497.6	22171.5	18192.5	37.09	940.571	9	0.1	471.293	78.2		432230	4	F4:21583	MSB66431A.raw	Q9NR30|DDX21_HUMAN
EVISKLYAV	14.41	18875.5	11552.4	10066.5	19228.6	10161.5	30.76	1020.59	9	-2.4	511.299	72.82	0	37218	1	F1:20192	MSB66428A.raw	P50990|TCPQ_HUMAN
FALPGLLHA	17.31	34011.1	15923	4202.27	15590.9	8566.12	34.96	937.538	9	0	469.776	100.43	39056000	107580000	4	F4:27732	MSB66431A.raw	Q13751|LAMB3_HUMAN
FGANAILGV	26.97	25871.8	22149.5	7171.94	10915.3	10353.9	16.37	860.476	9	-0.3	431.245	96.55		554750	3	F3:26623	MSB66430A.raw	P06733|ENOA_HUMAN:P13929|ENOB_HUMAN:P09104|ENOG_HUMAN
FGFEITHEV	8.78	15752	18326.5	1000.8	4196.05	1373.51	43.16	1077.51	9	-0.7	539.763	84.65	523510	122150	3	F3:23400	MSB66430A.raw	O96015|DNAL4_HUMAN
FIAKSFYDL	15.28	5928.36	5592.45	14034.5	1881.14	3777.74	40.56	1102.57	9	0.3	552.292	89.32	0	1052400	3	F3:24567	MSB66430A.raw	P18283|GPX2_HUMAN
FLDGNELTL	20.3	16711.9	12368.4	17944.5	1013.61	1371.19	25.16	1020.51	9	0	511.264	102.55	4106900	793590	1	F1:29294	MSB66428A.raw	O00299|CLIC1_HUMAN
FLEKLLPPV	4.62	24940.5	16087.9	11075.1	9473.04	11059.8	40.17	1054.64	9	-0.6	528.328	101.49	5888400	1358600	3	F3:28047	MSB66430A.raw	O95372|LYPA2_HUMAN
FLLDALSED	365.91	39294.6	36285.6	33170.5	36821.2	32945.5	33.68	1021.5	9	0.3	511.756	106.02	59413000	33965000	3	F3:29678	MSB66430A.raw	P20810|ICAL_HUMAN
FLLDALSEDF	209.99	6144.73	20763.5	22121.9	17388.7	8538.17	46.18	1168.57	10	0.8	585.29	113.25	8749100	3771800	3	F3:32514	MSB66430A.raw	P20810|ICAL_HUMAN
FLQEGDLISA	23.18	36216.2	24746	22359.4	26941.6	25069.1	38.42	1091.55	10	-0.4	546.782	89.29		875800	4	F4:24421	MSB66431A.raw	Q13868|EXOS2_HUMAN
FQDEINWRL	3.33	6452.77	20062.5	8564.18	6855.25	854.93	46.34	1219.6	9	-1.2	610.806	94.95	0	11268000	4	F4:25994	MSB66431A.raw	P51784|UBP11_HUMAN
FQTTVTAQIL	161.81	21081.3	19715.5	19209.7	10160.6	7831.99	46.87	1120.61	10	-0.6	561.313	91.7	14826000	2611900	1	F1:25614	MSB66428A.raw	Q9UBQ5|EIF3K_HUMAN
FRVPTANVSV	248.5	27075.2	20557.8	20617.1	1172.22	1498.08	41.26	1088.6	10	-0.5	545.306	74.69	5317000	566720	1	F1:20781	MSB66428A.raw	P04406|G3P_HUMAN
FSWEGAFQHV	9.23	8864.73	25187.3	5237.02	12402.6	13144.7	52.77	1206.55	10	-1.1	604.279	100.11		5408100	4	F4:27592	MSB66431A.raw	P26641|EF1G_HUMAN
FVADGIFKA	3.64	31759.7	20352.2	11600.1	20468.6	7479.02	37.54	966.517	9	-1.2	484.265	75.42		106660	4	F4:20793	MSB66431A.raw	P23396|RS3_HUMAN
FVDDYTVRV	5.01	26471.8	20704.5	9223.72	4442.3	2373.44	49.31	1112.55	9	-0.9	557.282	67.48	0	769000	4	F4:18573	MSB66431A.raw	O00487|PSDE_HUMAN
FVFPGELLL	8.64	7698.9	11158.9	3294.15	1186.55	524.75	32.82	1033.58	9	0.2	517.8	115.5	5270300	10398000	4	F4:33491	MSB66431A.raw	Q15758|AAAT_HUMAN
FVIRNIVEA	6.6	30224.9	13377	12148.6	12368	7070.77	42.81	1059.61	9	-0.8	530.811	76.43	3925400	2621300	4	F4:21052	MSB66431A.raw	P62854|RS26_HUMAN:Q5JNZ5|RS26L_HUMAN
FVNDIFERI	8.47	9658.61	23526.1	3670.8	8977.86	3097.86	48.21	1151.6	9	-1.3	576.805	100.25	0	19887000	3	F3:27668	MSB66430A.raw	P62807|H2B1C_HUMAN:Q16778|H2B2E_HUMAN:Q99879|H2B1M_HUMAN:Q93079|H2B1H_HUMAN:Q5QNW6|H2B2F_HUMAN:Q99877|H2B1N_HUMAN:P58876|H2B1D_HUMAN:P33778|H2B1B_HUMAN:P23527|H2B1O_HUMAN:Q99880|H2B1L_HUMAN:Q8N257|H2B3B_HUMAN:O60814|H2B1K_HUMAN:P06899|H2B1J_HUMAN:P57053|H2BFS_HUMAN
FVVDEVSNI	10.42	23161.9	20868.2	10794.5	6712.19	6320.79	35.82	1020.51	9	-1.5	511.263	88.44	522940	256460	1	F1:24575	MSB66428A.raw	P63172|DYLT1_HUMAN
GIYTGFIKV	14.73	29264	29318.8	16726.5	25440.7	20745.3	33.42	996.564	9	-0.3	499.289	91.22	672190	248680	2	F2:25207	MSB66429A.raw	Q86WH2|RASF3_HUMAN
GQDVGRYQV	205.45	28762	28570.1	29836	30307.4	26165.4	40.48	1020.5	9	-0.8	511.256	37.9	871440	72367	1	F1:10176	MSB66428A.raw	P51571|SSRD_HUMAN
GQFGVGFYSA	21.98	23310.5	29980.6	22177.8	39684.3	29918.7	45.66	1031.47	10	0.3	516.743	88.41	4638900	3272600	3	F3:24405	MSB66430A.raw	P07900|HS90A_HUMAN:P08238|HS90B_HUMAN:P14625|ENPL_HUMAN:Q58FF6|H90B4_HUMAN:Q12931|TRAP1_HUMAN
GQLDFSEFL	7.25	15479.2	33361.3	21941	20261.3	6808.16	44.86	1054.5	9	-0.6	528.255	110.9	20273000	18468000	3	F3:31624	MSB66430A.raw	P31949|S10AB_HUMAN
GQSELTLLL	22.39	10377	22401.1	17432.7	17067.1	4888.07	27.67	972.549	9	0.3	487.282	108.5	3268500	1965800	3	F3:30744	MSB66430A.raw	Q7L1Q6|BZW1_HUMAN
GQVGGQVSV	21.59	33262.5	25782.4	24716.2	26831.1	22194.8	36.44	829.429	9	0	415.722	34.57	0	3273000	3	F3:9178	MSB66430A.raw	#CONTAM#IPI:CON_IPI00479145.2|SWISS-PROT:P08727:P08727|K1C19_HUMAN
GVIEKLLTS	271.83	39775.4	29044.1	35778.1	36237	27907.1	23.31	958.57	9	-0.6	480.292	85.81		67319	2	F2:23772	MSB66429A.raw	O75534|CSDE1_HUMAN
GVIQDFINA	56.32	39356.8	29069.3	29478.8	37747.3	34312	37.88	975.503	9	0.3	488.759	104.16	1970500	814630	1	F1:30064	MSB66428A.raw	P78527|PRKDC_HUMAN
GVLPNIQAV	11.36	29620.4	16202.8	17702.6	11637	12228.8	43.46	909.528	9	-0.9	455.771	90.23	2654200	837860	4	F4:24709	MSB66431A.raw	P04908|H2A1B_HUMAN:Q6FI13|H2A2A_HUMAN:Q7L7L0|H2A3_HUMAN:Q93077|H2A1C_HUMAN:P0C0S8|H2A1_HUMAN:P20671|H2A1D_HUMAN:Q96QV6|H2A1A_HUMAN:Q16777|H2A2C_HUMAN:Q99878|H2A1J_HUMAN:Q96KK5|H2A1H_HUMAN:Q9BTM1|H2AJ_HUMAN:P16104|H2AX_HUMAN:Q8IUE6|H2A2B_HUMAN
GVVARLLAL	97.73	26867.4	1117.58	27459.6	8947.41	9443.97	18.56	910.596	9	-0.8	456.305	93.62	0	551000	4	F4:25622	MSB66431A.raw	Q99536|VAT1_HUMAN
GVVPQLVKL	170.27	29704.5	18440.5	28199.7	17795.8	14833.1	34.71	951.612	9	0.1	476.813	88.81	707430	971960	1	F1:24656	MSB66428A.raw	P52292|IMA1_HUMAN
HLYFETVTI	262.33	10428.8	16007.1	5016.67	6585.94	5422.52	41.92	1121.58	9	-2.1	561.794	95.12	2058800	943210	3	F3:26161	MSB66430A.raw	Q15155|NOMO1_HUMAN:P69849|NOMO3_HUMAN:Q5JPE7|NOMO2_HUMAN
IIDDTIFNL	15.33	17398.2	21982.6	18438.7	5058.2	6280.3	35.06	1062.56	9	-0.3	532.287	109.94	0	4469900	3	F3:31304	MSB66430A.raw	O15118|NPC1_HUMAN
IQHDLIFSL	9.39	5609	16682.3	9592.37	8276.04	712.06	38.08	1084.59	9	-0.2	543.303	100.5	2692700	1314100	1	F1:28579	MSB66428A.raw	Q16665|HIF1A_HUMAN
IQINVGTTV	21.32	15292	22130.8	12487.1	11678.7	9445.09	33.2	943.534	9	0.1	472.774	72.94	0	289580	4	F4:20116	MSB66431A.raw	P46379|BAG6_HUMAN
ITLEDLEQL	45.8	16621.7	30117.5	21785.6	12385	13657.9	30.18	1072.57	9	1.3	537.291	108.59	3868600	3383000	1	F1:32045	MSB66428A.raw	Q15121|PEA15_HUMAN
ITVEKIIKI	233.13	11374.9	30169.7	13345.9	9548.26	11107.5	25.52	1055.7	9	-0.9	528.855	70.63		176770	4	F4:19398	MSB66431A.raw	Q15149|PLEC_HUMAN
KIFDEILVNA	54.82	31707.8	30524	24978.4	34688.2	27941.2	44.65	1160.64	10	-1	581.329	91.71		1042200	4	F4:25059	MSB66431A.raw	P11388|TOP2A_HUMAN:Q02880|TOP2B_HUMAN
KVLDFEHFL	8.38	8686.71	20779	15637.7	9133.36	5364.57	39.96	1146.61	9	-0.2	574.311	98.72		3469800	2	F2:27290	MSB66429A.raw	P60660|MYL6_HUMAN
KVLPGVDALSNI	306.68	22032.1	24030.1	21589.2	24862.7	34948.6	51.55	1224.71	12	-0.7	613.361	88.87	40640000	14146000	4	F4:24419	MSB66431A.raw	P00558|PGK1_HUMAN
KVPEIEVTV	34.26	14142.2	26524	17988.8	615.46	8977.57	34.71	1012.58	9	-0.7	507.297	69.35	0	362260	3	F3:19150	MSB66430A.raw	P78347|GTF2I_HUMAN
LIWPWFERL	57.86	5555.72	16809.8	7530.83	10966.6	8604.39	38.4	1258.69	9	-0.4	630.35	110.92	0	6029900	1	F1:32918	MSB66428A.raw	P78417|GSTO1_HUMAN
LLGPRLVLA	127.74	30461.3	24977.8	18308.7	24378.9	16790.7	28.15	950.628	9	-0.6	476.321	84.19	6872500	186410	4	F4:23117	MSB66431A.raw	P49755|TMEDA_HUMAN
LLLDVPTAAV	20.07	32520.5	15648.4	14074.2	16471.2	23048.9	24.73	1010.6	10	-1.5	506.307	105.04		421140	4	F4:29453	MSB66431A.raw	P13284|GILT_HUMAN
LLWPWFERL	25.55	3804.52	20810.8	7217.95	9594.97	5966.2	38.4	1258.69	9	-0.4	630.35	110.92	0	6029900	1	F1:32918	MSB66428A.raw	Q9H4Y5|GSTO2_HUMAN
LQIQQGLQTL	184.18	16095.4	12200.4	24101.2	14437.9	16012.2	38.39	1140.65	10	-2.8	571.331	89.28	1171300	212980	1	F1:24795	MSB66428A.raw	Q9UMX0|UBQL1_HUMAN:Q9NRR5|UBQL4_HUMAN
LVLDSVKLEA	348.21	40097.4	24690.8	21882	35982.7	33307.2	40.55	1085.63	10	-0.8	543.823	83.44	509480	389030	1	F1:23147	MSB66428A.raw	O75347|TBCA_HUMAN
MVLLESEQFL	188.98	23370.1	21170.5	17775.4	17709.5	23781.3	52.81	1207.62	10	-1.7	604.814	109.57	18676000	12535000	4	F4:31237	MSB66431A.raw	P37108|SRP14_HUMAN
NIIPRFVQV	10.4	17708.4	13267.1	8930.68	6645.5	3330.92	31.74	1084.64	9	-1.1	543.326	91.2	3508900	2749300	4	F4:25036	MSB66431A.raw	O75044|SRGP2_HUMAN:P0DMP2|SRG2B_HUMAN:P0DJJ0|SRG2C_HUMAN
NLAEKLIGV	9.18	30020.8	25178.3	17686.2	13483.8	10717.8	22.28	955.57	9	-0.3	478.792	85.64	368530	34561	2	F2:23727	MSB66429A.raw	Q86X10|RLGPB_HUMAN
NQPGVLIQV	25.91	16787.8	33121	19249.4	7164.41	4746.57	40.79	966.55	9	0.1	484.282	83.88	2647200	480780	1	F1:23276	MSB66428A.raw	P11142|HSP7C_HUMAN:P0DMV8|HS71A_HUMAN:P0DMV9|HS71B_HUMAN:P34931|HS71L_HUMAN
NQTPVTLQV	79.33	20465.1	26255.6	9074.84	20742.4	5363.58	29.92	998.54	9	-0.6	500.277	70.79	767300	145090	1	F1:19519	MSB66428A.raw	P26368|U2AF2_HUMAN
NVIDNLIVA	49.86	37244.2	19990.2	18987.1	23312.8	13079.9	33.02	969.549	9	-0.8	485.782	102.5	5276400	15226000	4	F4:28441	MSB66431A.raw	Q12905|ILF2_HUMAN
NVVEQFLQA	120.66	37139.2	23832.5	17858.8	30520.6	18878	35.69	1046.54	9	-1.4	524.276	104.31	925790	2709000	1	F1:30126	MSB66428A.raw	Q14258|TRI25_HUMAN
RAADVLVYL	13.39	9984.93	2518.29	8052.3	1614.5	990.34	22.2	1018.58	9	-0.5	510.298	92.21		226090	3	F3:25426	MSB66430A.raw	Q9BZ68|FR8P1_HUMAN:Q9BZ67|FRMD8_HUMAN
RIIDVVYNA	8.45	23621.3	19945.7	15263.1	28748.4	14741.2	39.04	1061.59	9	-0.8	531.8	65.27		1544500	4	F4:17841	MSB66431A.raw	P62241|RS8_HUMAN
RVADILTQL	13.29	10574.4	991.89	17304.6	2747.02	2367.26	34.92	1027.6	9	0.8	514.809	88.65		288380	4	F4:24288	MSB66431A.raw	Q9BZZ5|API5_HUMAN
RVLDELTLA	19.17	33078.4	20971.2	21435.8	32362.2	22881	33.18	1028.59	9	0.1	515.301	75.86	0	90270	4	F4:20959	MSB66431A.raw	#CONTAM#IPI:CON_IPI00479145.2|SWISS-PROT:P08727:P08727|K1C19_HUMAN:#CONTAM#IPI:CON_IPI00290077.1|SWISS-PROT:P19012:P19012|K1C15_HUMAN:#CONTAM#IPI:CON_IPI00230365.5|SWISS-PROT:Q9QWL7:#CONTAM#IPI:CON_00230365.5|SWISS-PROT:Q9QWL7:#CONTAM#IPI:CON_00225378.3|TREMBL:A2A4G1:#CONTAM#IPI:CON_00112947.1|SWISS-PROT:P19001:Q04695|K1C17_HUMAN:#CONTAM#IPI:CON_IPI00450768.7|SWISS-PROT:Q04695:#CONTAM#IPI:CON_001…
SIIDKLVNI	7.85	11052.5	17823.9	14622.8	5554.58	4961.66	33.54	1013.61	9	-0.3	507.813	103.3	1200600	372250	3	F3:28686	MSB66430A.raw	P21583|SCF_HUMAN
SIIPPLFTV	3.22	8565.84	11903	6109.06	4946.07	5139.13	34.36	985.585	9	0.3	493.8	112.02	3106900	5724700	1	F1:33318	MSB66428A.raw	P51571|SSRD_HUMAN
SLIADLEQL	17.27	17189.4	21876	27077.2	8142.01	9741.52	26.7	1000.54	9	-0.3	501.279	111.33		742280	4	F4:31878	MSB66431A.raw	Q8WUP2|FBLI1_HUMAN
SLINVGLISV	7.95	29804.7	20667.1	18653.8	22602.4	24213.3	34.33	1013.61	10	-1.7	507.812	110.43		1450900	4	F4:31556	MSB66431A.raw	Q92688|AN32B_HUMAN
SLIRNLEQL	38.03	6747.37	14949.3	26224.1	4347.87	5714.11	33.33	1084.62	9	-2.6	543.318	90.94		583260	3	F3:25068	MSB66430A.raw	Q15833|STXB2_HUMAN
SLLDIIEKV	5.39	22402	33759.6	11353.5	18471.6	9802.1	30.18	1028.61	9	-1.2	515.312	109.89		1486900	3	F3:31281	MSB66430A.raw	P49815|TSC2_HUMAN
SLLDKIIGA	14.74	35635.9	28784.2	25608	23635.8	16466.9	23.35	928.559	9	-1.8	465.286	101.88		1051800	2	F2:28183	MSB66429A.raw	Q6NZI2|CAVN1_HUMAN
SLLENLEKI	14.75	8199.75	31399.9	14421.5	12750.8	13345	27.13	1057.6	9	4.6	529.811	103.65		1470400	4	F4:28879	MSB66431A.raw	P07910|HNRPC_HUMAN:O60812|HNRC1_HUMAN:B2RXH8|HNRC2_HUMAN:P0DMR1|HNRC4_HUMAN:B7ZW38|HNRC3_HUMAN
SQIEADFRL	7.58	9679.63	23333	15663	13835.7	6103.58	37.45	1077.55	9	0.2	539.78	80.03	5650600	3780700	2	F2:22213	MSB66429A.raw	P11387|TOP1_HUMAN
SQVDVAVKI	45.57	17344.5	30217.3	13267.1	23140.9	11431.6	30.29	957.549	9	0.1	479.782	55.91	137620	257760	4	F4:15275	MSB66431A.raw	P54278|PMS2_HUMAN
SQYPEIIFL	8.39	8030.29	25951.4	13631.8	4308.62	710.67	27.97	1108.58	9	0.5	555.298	110.89	2919900	7174400	1	F1:32880	MSB66428A.raw	Q9BQ52|RNZ2_HUMAN
STLHLVLRL	188.14	8952.06	15665.3	18438.7	13069.1	9855.7	50.76	1050.65	9	-0.3	351.226	86.75	5301000	2094500	2	F2:23988	MSB66429A.raw	P62987|RL40_HUMAN:P62979|RS27A_HUMAN:P0CG47|UBB_HUMAN:P0CG48|UBC_HUMAN
SVHKGFAFV	9.88	14672.1	7628.83	10704.2	7023.57	8156.83	32.51	990.529	9	0.5	496.272	47.1		442940	4	F4:12622	MSB66431A.raw	P07910|HNRPC_HUMAN:O60812|HNRC1_HUMAN:B2RXH8|HNRC2_HUMAN:P0DMR1|HNRC4_HUMAN:B7ZW38|HNRC3_HUMAN
SVIEQIVYV	2.42	19371.2	21059	9520.41	6234.19	2348.36	43.49	1048.58	9	0.2	525.298	104.33		1288300	4	F4:29142	MSB66431A.raw	Q00653|NFKB2_HUMAN
SVITQVFHV	4.56	13199.1	20808.7	8218.04	14750.2	6886.47	43.67	1028.57	9	-0.1	515.29	96.64	1693700	4087300	1	F1:27232	MSB66428A.raw	Q00341|VIGLN_HUMAN
SVLNVLHSL	10.99	7213.65	2147.84	15473.3	5051.96	3720.7	32.82	980.566	9	0	491.29	99.01	0	481260	1	F1:28057	MSB66428A.raw	Q9Y262|EIF3L_HUMAN
TALLKIEGV	328.72	33240.2	27169.7	10590.5	22767.3	23652	28.13	942.575	9	0	472.295	75.27		128660	4	F4:20660	MSB66431A.raw	P18077|RL35A_HUMAN
TAMDVVYAL	15.42	7891.79	1372.22	4075.59	1749.56	725.83	39.59	981.484	9	-0.8	491.749	102.09	2334500	715890	1	F1:29162	MSB66428A.raw	P62805|H4_HUMAN
TILRLLQQV	21.8	23719.4	22830.8	11880.5	24492.4	23368.1	38.68	1082.68	9	-0.1	542.348	103.33	0	3513000	4	F4:28749	MSB66431A.raw	Q14152|EIF3A_HUMAN
TLIEDILGV	3.46	28150	30697.5	14173.9	15659.1	10583.9	39.08	971.554	9	-0.5	486.784	113.61	7182900	15122000	1	F1:33962	MSB66428A.raw	Q8TEL6|TP4AP_HUMAN
TQTPWLPVL	34.16	6236.82	15989	13294.2	7215.76	1722.19	35.95	1053.59	9	-0.6	527.8	110.61	2505600	1251000	3	F3:31499	MSB66430A.raw	Q9UNE0|EDAR_HUMAN
TTYEGIFKTL	97.3	1671.89	17101.3	18433.3	7550.01	4970.31	43.04	1171.61	10	1.2	586.814	92.61		646630	4	F4:25336	MSB66431A.raw	Q8WWM7|ATX2L_HUMAN
TVIDQIPFL	8.01	14911.8	18700.9	16521.7	4499.34	1731.54	26.5	1044.59	9	0.1	523.3	111.64	975270	4583500	4	F4:32012	MSB66431A.raw	O15297|PPM1D_HUMAN
TVTTVILEV	35.73	28244.3	22401.8	9981.9	18613.1	11238.9	39.49	973.57	9	-1.3	487.791	99.61	0	4667800	4	F4:27465	MSB66431A.raw	Q9UKF6|CPSF3_HUMAN
VLIPKLPQL	12.45	4180.82	12507.7	17170.8	1173.56	1070.83	26.01	1019.67	9	-0.9	510.844	103.4	5766000	8076700	3	F3:28706	MSB66430A.raw	Q8N138|ORML3_HUMAN
VLLESEQFLTEL	176.75	30134.4	32105.5	33763.6	19796.7	27657	61.45	1419.75	12	-1.1	710.881	111.28	304640000	299780000	4	F4:31856	MSB66431A.raw	P37108|SRP14_HUMAN
VQIGDIVTV	3.93	13305.1	29556.7	11910.1	14829.6	8343.92	32	942.539	9	-0.7	472.276	96.6	26241000	38932000	3	F3:26636	MSB66430A.raw	P62280|RS11_HUMAN
VQVDGKIGL	125.7	30903.8	24194	30379.6	14179.7	12927.2	30.43	927.539	9	0.2	464.777	55.18	0	2704500	2	F2:15006	MSB66429A.raw	Q9NZJ7|MTCH1_HUMAN
VQVEDIVFL	9.25	13969.4	31349	21710	11681.1	4290.71	39.82	1060.58	9	-0.7	531.297	110.63	899700	5609400	4	F4:31623	MSB66431A.raw	Q15543|TAF13_HUMAN
VTFLGALAL	315.94	13097	5588.65	13328.3	2373.9	6774.58	33.79	903.543	9	-0.4	452.779	112.59	491840000	100420000	4	F4:32339	MSB66431A.raw	P06703|S10A6_HUMAN
WQIGKIGTVM	292.44	20850.6	7564.48	24674.6	20756.1	8147.65	48.9	1131.61	10	-1.3	566.812	92.68	5457000	2578200	1	F1:25853	MSB66428A.raw	P30046|DOPD_HUMAN
YLDPSVLSGV	8.75	19432.5	19175.8	17343.9	3790.39	9603.9	40.08	1048.54	10	-0.7	525.279	97.32		2743300	4	F4:26623	MSB66431A.raw	Q15041|AR6P1_HUMAN
YLGQVAILL	133.84	9058.07	25073.9	20454.2	9023.24	8774.84	29.01	988.596	9	-0.6	495.305	110.31	18430000	1991700	2	F2:31512	MSB66429A.raw	P63167|DYL1_HUMAN:Q96FJ2|DYL2_HUMAN
YLIPLLERL	6.66	4732.88	18975	12680.9	2640.53	1076.83	26.45	1128.69	9	-1	565.352	110.19		3628200	3	F3:31361	MSB66430A.raw	P26196|DDX6_HUMAN
YLKDFFSNV	6.09	14083.7	17158.8	9514.74	3613.07	1195.72	39.05	1131.56	9	-1.9	566.786	93.82		571420	4	F4:25673	MSB66431A.raw	O95786|DDX58_HUMAN
YLLPKDIKL	17.58	8168.31	16100.6	14577.6	1811.23	1110.65	33.21	1101.68	9	-1.3	368.233	85.45	8080800	1951600	1	F1:23688	MSB66428A.raw	Q6T310|RSLBA_HUMAN
YQAPDIDVQL	36.38	17379.1	20779.2	20409.4	956.09	5036.14	41.13	1160.57	10	0.3	581.293	96.04	4835800	6788000	3	F3:26419	MSB66430A.raw	Q9NZM5|NOP53_HUMAN
YQLDAKLQL	10.56	9565.22	15011.5	14498	5986.18	958	24.66	1090.6	9	1.8	546.309	84.13	187230	247140	1	F1:23333	MSB66428A.raw	O15031|PLXB2_HUMAN
YSIDLSERV	19.7	21069	27692.6	6805.88	8539.66	6857.77	33.93	1080.55	9	1.4	541.281	69.43		135240	2	F2:19192	MSB66429A.raw	Q6NTF9|RHBD2_HUMAN
YVITDLTQL	8.74	15772	9962.38	19872.9	2599.54	2351.48	32.73	1064.58	9	-0.3	533.295	106.56	4167300	2927600	4	F4:30060	MSB66431A.raw	O43187|IRAK2_HUMAN
YVTFLGALAL	115.96	16341.8	3216.14	13702.9	5320.06	11405.5	49.04	1066.61	10	0.5	534.311	114.75	302330000	113300000	4	F4:33185	MSB66431A.raw	P06703|S10A6_HUMAN
SYIEHIFEI	82.86	7.05	21264.6	9747.11	4995.92	31.28	45.79	1149.57	9	0.1	575.793	105.88	0	20854000	3	F3:29679	MSB66430A.raw	Q15121|PEA15_HUMAN
AYLHTTTTF	14102.3	13.57	19179.2	30003	11395.9	305.21	38.42	1053.51	9	0.2	527.764	53.08	6303000	1404600	3	F3:14459	MSB66430A.raw	O15438|MRP3_HUMAN
FFYPLDFTF	661.88	22.14	19861.3	6812.36	9635.75	127.53	48.38	1195.56	9	0.8	598.787	115.85	5360900	2471200	1	F1:34891	MSB66428A.raw	Q06830|PRDX1_HUMAN:P32119|PRDX2_HUMAN:Q13162|PRDX4_HUMAN:P30048|PRDX3_HUMAN
FYPAIADLF	7310.93	11.89	26920.3	23362.3	4045.67	90.15	39.59	1055.53	9	-0.8	528.773	113.08	4262000	748410	1	F1:33765	MSB66428A.raw	Q92791|SC65_HUMAN
FYPPKVELF	11585.8	15.34	28451.9	29855	1672.41	43.42	39.18	1138.61	9	-1	570.31	99.36	11734000	22634000	3	F3:27406	MSB66430A.raw	P22234|PUR6_HUMAN
FYSNIQTVI	7203.43	73.07	19185.8	10133.8	6282.74	104.67	38.96	1083.56	9	-0.6	542.787	93.69	340110	2044700	4	F4:25680	MSB66431A.raw	P24928|RPB1_HUMAN
GYRAFSLSF	21997.8	106.59	14247.4	32079.8	20473.3	461.38	32.86	1046.52	9	0	524.266	95.89	2116400	913160	3	F3:26410	MSB66430A.raw	Q86W42|THOC6_HUMAN
IYAPPLPSL	3446.55	69.68	9956.77	21932.5	865.05	70.67	27.53	969.553	9	-0.5	485.784	104.96	3241100	2619700	3	F3:29346	MSB66430A.raw	Q92667|AKAP1_HUMAN
IYFEYSHAF	3601.44	6.41	16726.9	14924.9	3875.61	14.35	37.41	1175.53	9	0.2	588.772	88.85	175780	453300	1	F1:24728	MSB66428A.raw	P20585|MSH3_HUMAN
IYKPVTDFF	21725.1	9.07	28294.4	25448.1	16881.8	84.39	40.82	1128.59	9	-0.1	565.3	92.66		608810	4	F4:25302	MSB66431A.raw	P42704|LPPRC_HUMAN
IYKWITDNF	27214.7	11.83	30842	28326.6	23655.8	374.29	45.4	1198.6	9	-2.4	600.307	97.21		1453500	4	F4:26635	MSB66431A.raw	Q92949|FOXJ1_HUMAN
IYNGKLFDL	13052.9	161.86	28609.3	31846.1	13875.7	237.71	37.83	1081.58	9	-1.5	541.797	92.12		91377	4	F4:25202	MSB66431A.raw	Q99661|KIF2C_HUMAN
KFIDNTLYF	2988.59	22.71	21115.1	24072.5	6711.76	120.81	44.88	1159.59	9	-0.3	580.803	93.13	1838300	368550	4	F4:25489	MSB66431A.raw	Q14116|IL18_HUMAN
KYDEIFYNL	674.33	52.51	25126.6	21779	8261.99	422.8	41.9	1203.58	9	-0.6	602.798	94.69		1241800	4	F4:25883	MSB66431A.raw	Q9NZN4|EHD2_HUMAN
KYMDVQFDF	5175.79	5.79	25674.3	20468.4	20803.3	195.98	43.01	1191.53	9	0.3	596.771	95.67	2776500	6247500	4	F4:26206	MSB66431A.raw	O00159|MYO1C_HUMAN
KYNDNFFGL	2041.21	54.91	25749.7	27453.4	7974.7	155.74	42.7	1116.52	9	-0.6	559.269	95.52		3000400	4	F4:26083	MSB66431A.raw	Q8N806|UBR7_HUMAN
KYPSPFFVF	10925.2	4.65	23502.2	27193.5	2208.55	97.45	32.78	1130.58	9	0.9	566.298	106.88	18806000	12659000	1	F1:31319	MSB66428A.raw	Q08211|DHX9_HUMAN
LYKELGEYF	22904.5	43.76	30785.3	30807.3	23050.9	195.64	40.64	1160.58	9	-1.5	581.294	88.7		541280	4	F4:24318	MSB66431A.raw	O60610|DIAP1_HUMAN
LYPEVFEKF	13660.1	7.94	34128.3	28178.6	7220.13	237.07	38.18	1170.6	9	-0.2	586.305	96.92		3698200	4	F4:26573	MSB66431A.raw	Q6PL18|ATAD2_HUMAN
LYPSIIQEF	13784.1	9.15	27478.9	28909	2865.66	46.74	36.34	1108.58	9	0.2	555.298	108.83	8349100	7146300	4	F4:30951	MSB66431A.raw	P09884|DPOLA_HUMAN
LYQEVFGRL	12966.7	79.22	24173.8	23023.5	10365.4	478.38	29.04	1123.6	9	0.3	562.809	86.97	0	29809	4	F4:23852	MSB66431A.raw	Q14494|NF2L1_HUMAN
LYSEVDVHF	9654.64	30.77	29706.5	22463.5	20450.2	382.43	38.22	1107.52	9	0.1	554.769	79.4	1378600	1023200	4	F4:21888	MSB66431A.raw	Q7Z3K3|POGZ_HUMAN
NYIKDLNIL	13667.2	152.07	27091.3	30753.3	18797.6	477.93	39.98	1104.62	9	-1.1	553.316	92.79	3758500	2163200	3	F3:25528	MSB66430A.raw	Q05D32|CTSL2_HUMAN
NYKKFYEQF	34189.3	27.28	35783.9	34367	29112.4	301.66	48.76	1265.61	9	-1.8	633.81	59.09	3175100	4715600	2	F2:16193	MSB66429A.raw	P07900|HS90A_HUMAN
NYLDQIAKF	21062	33.17	34447.8	29666	26345.8	232.36	30.25	1110.57	9	0.4	556.293	96.48		285100	4	F4:26461	MSB66431A.raw	P41229|KDM5C_HUMAN:Q9BY66|KDM5D_HUMAN
NYLSIFRKF	24419.9	13.26	31769	27841.6	27846.1	189.96	45.67	1186.65	9	-0.5	396.557	95.24	0	1967500	1	F1:26722	MSB66428A.raw	P07384|CAN1_HUMAN
NYSPYVNYF	17407.1	13.51	28613.4	24434.7	10355.3	26.17	38.83	1165.51	9	-2.5	583.76	96.6		2590500	3	F3:26620	MSB66430A.raw	Q7Z388|D19L4_HUMAN
QYAPLLAVF	14401.4	12.68	20623.8	26025.9	15750	173.39	39.13	1020.56	9	0.2	511.29	112.34	2550500	1836000	4	F4:32277	MSB66431A.raw	Q9Y6E2|BZW2_HUMAN
RWFDKSFTF	2447.93	5.43	19049.1	15444.7	10678.9	212.72	51.9	1232.6	9	0.2	411.873	91.2	1174800	6011300	4	F4:24965	MSB66431A.raw	P50416|CPT1A_HUMAN
RYKLYQEMF	30355.6	26.19	29802.7	34147.9	25675.2	496.63	41.94	1276.63	9	0.5	426.55	70.22		55248	4	F4:19355	MSB66431A.raw	Q14204|DYHC1_HUMAN
RYLPDTLLL	4225.89	16.22	18403.4	19054.8	6578.68	172.77	26.04	1102.64	9	-0.9	552.326	98.76	2360700	2125700	1	F1:27976	MSB66428A.raw	P21964|COMT_HUMAN
SYATLLHVL	5457.42	39.89	12966.9	25379.9	4489.71	64.21	43.6	1015.57	9	0.7	508.793	99.31	0	217800	1	F1:28159	MSB66428A.raw	O43194|GPR39_HUMAN
SYGDILHVI	6647.51	16.99	26470.9	20529.6	12822.3	426.41	50.84	1015.53	9	0	508.774	96.77	0	2936500	3	F3:26738	MSB66430A.raw	Q92796|DLG3_HUMAN
SYIPIFPQL	1442.3	20.98	20166.8	18370.4	3053.93	59.75	32.12	1076.59	9	1.6	539.303	111.68	657140	2524700	3	F3:31945	MSB66430A.raw	Q6Y1H2|HACD2_HUMAN
SYIPLFPQL	1806.89	24.29	19803.8	19003.2	3661.24	73.54	32.12	1076.59	9	1.6	539.303	111.68	657140	2524700	3	F3:31945	MSB66430A.raw	B0YJ81|HACD1_HUMAN
SYMGHFDLL	2139.49	11.02	13464	18686.3	3695.83	77.25	45.3	1081.49	9	-0.1	541.752	97.37	2303400	3764000	4	F4:26663	MSB66431A.raw	Q9BWJ5|SF3B5_HUMAN
SYQKVIELF	15331.6	4.4	29762.1	26857.5	23370.9	233.77	42.96	1125.61	9	-1	563.81	94.18	30376000	27359000	3	F3:25981	MSB66430A.raw	Q96KB5|TOPK_HUMAN
TYLKAVKLF	25131.8	11.13	32961.9	30940.6	25274.7	413.46	38.08	1081.65	9	-1	541.833	76.23		45177	4	F4:20988	MSB66431A.raw	P48200|IREB2_HUMAN
TYLPTSPLL	5631.8	39.71	20014.7	18475.6	3974	146.63	32.13	1003.56	9	0.8	502.787	103.59		1746100	4	F4:28817	MSB66431A.raw	O43847|NRDC_HUMAN
TYMKDLYQL	2561.01	10.06	19375.4	22294.5	12639	238.54	44.71	1173.57	9	-1.8	587.793	81.56	6000600	6325400	4	F4:22428	MSB66431A.raw	Q8N392|RHG18_HUMAN
TYQRWQFTL	6177.19	6.49	17436.7	14507.5	10727.2	141.31	45.38	1241.62	9	-1.8	621.816	96.26		6679700	2	F2:26495	MSB66429A.raw	Q6P2Q9|PRP8_HUMAN
VYFPDQHINF	22459.1	17.66	31877.1	26016.6	10647.6	394.96	40.62	1278.6	10	-0.5	640.309	88.7	0	1086300	4	F4:24316	MSB66431A.raw	Q8TEW8|PAR3L_HUMAN
VYIGVHVPF	8727.78	14.76	19395.5	24766.6	14211.5	206.39	35.16	1029.56	9	-0.1	515.79	97.31		6151600	2	F2:26837	MSB66429A.raw	Q9Y6M7|S4A7_HUMAN
VYISEHEHF	22984.9	10.33	33149.3	29822.7	18468.8	254.59	37.58	1159.53	9	-1.6	580.771	49.47	1310800	458800	1	F1:13376	MSB66428A.raw	O96005|CLPT1_HUMAN
VYISSLALL	3382.97	14.8	21386.9	22853.7	3299.25	125.69	26.93	977.58	9	0.2	489.797	110.02		2012700	4	F4:31405	MSB66431A.raw	O00487|PSDE_HUMAN
VYKTIMEQF	30218	23.03	35723.9	33250.6	29626.5	326.88	42.44	1157.58	9	-0.4	579.797	77.93	437980	92353	4	F4:21389	MSB66431A.raw	Q9UQB8|BAIP2_HUMAN
VYLDKFIRL	6680.31	42.89	31406.4	26155.2	8427.3	197.5	39.89	1165.69	9	-0.2	583.85	92.61		489420	4	F4:25313	MSB66431A.raw	Q9NVN8|GNL3L_HUMAN
VYVQNVVKL	13692.3	72.86	29362.6	30351.4	7321.93	199.16	29.06	1060.63	9	1.6	531.322	71.6		222460	2	F2:19799	MSB66429A.raw	O14617|AP3D1_HUMAN
VYVVGTAHF	19096.3	13.6	25764.5	29897.3	13135.7	230.8	40.73	991.513	9	-0.5	496.763	64.32	2129400	10877000	3	F3:17698	MSB66430A.raw	Q9H4I3|TRABD_HUMAN
YYEKLHTYF	13924.9	29.1	21348.5	29100.1	12665.3	61.55	45.87	1262.6	9	-0.1	632.306	68.56	1943900	1821200	1	F1:18948	MSB66428A.raw	P16144|ITB4_HUMAN
YYFEGIKQTF	6772.75	7.74	22362.1	21113.8	12884.8	49.82	53.93	1294.62	10	-0.9	648.318	87.88	3043600	3656300	4	F4:24062	MSB66431A.raw	O95433|AHSA1_HUMAN
YYQNYFEKL	6832.14	12.64	25752.2	22369.3	4157.31	34.64	51.32	1266.59	9	-1.2	634.303	83.4		687840	4	F4:22887	MSB66431A.raw	Q86TB9|PATL1_HUMAN
AYVHMVTHF	14608.1	24.67	30444.8	34270.4	24474.1	740.07	45.22	1103.52	9	0.6	368.848	55.53	18388000	9875100	4	F4:15168	MSB66431A.raw	P55061|BI1_HUMAN
DYTIGFGKF	38671.2	487.26	37658	36293.5	36746.7	7053.42	45.85	1046.51	9	-1	524.26	94.48		310320	3	F3:26045	MSB66430A.raw	P16144|ITB4_HUMAN
DYVEGLRVF	27366.8	493.12	30979.1	34987.9	28982.6	828.1	45.66	1096.56	9	-1.6	549.284	92.76		2782800	4	F4:25369	MSB66431A.raw	P60660|MYL6_HUMAN
EYIPKWEQF	27905.2	26.26	34740.1	30942.2	31523.1	1490.63	37.32	1238.6	9	-1.9	620.305	87.63	746540	1650600	3	F3:24185	MSB66430A.raw	Q9HBI5|CC014_HUMAN
EYLKVDAQF	25787.4	90.69	33893.9	30216.7	37377.9	4323.43	47.23	1111.55	9	-0.5	556.784	72.87	2791900	2091600	3	F3:20182	MSB66430A.raw	P54577|SYYC_HUMAN
EYLPIGGLAEF	2752.34	250.52	6697.32	20136.1	12644.5	7205.62	52.63	1207.61	11	0	604.813	110.88		2879000	4	F4:31720	MSB66431A.raw	P00505|AATM_HUMAN
EYQKVWNLF	29642.2	10.17	33108.8	31678	34468.6	3089.66	42.14	1225.61	9	-0.1	613.814	103.71	5529900	11661000	3	F3:28780	MSB66430A.raw	Q9H0J9|PAR12_HUMAN
GYPLWKVTF	26436.9	51.01	32788.3	37104.3	14198.7	869.73	45.2	1109.59	9	-1.2	555.802	105.25	4394600	3085600	3	F3:29445	MSB66430A.raw	P00491|PNPH_HUMAN
IFIDPGYQTF	5268.96	24.28	19892.9	25940.5	9566.98	771.16	40.69	1199.59	10	0.1	600.8	105.25	0	535070	3	F3:29446	MSB66430A.raw	Q9UBW7|ZMYM2_HUMAN
IFTDLSSRF	16884.4	133.94	25487.5	25461.9	14737.6	584.95	39.49	1084.56	9	0.1	543.285	83.77	1667100	798650	2	F2:23203	MSB66429A.raw	P13010|XRCC5_HUMAN
IYGSVWEKL	19873.5	20.13	31085.5	28659.5	19406.9	1687.64	33.08	1093.58	9	0.4	547.798	86.31		575250	4	F4:23621	MSB66431A.raw	Q96LT4|SAMD8_HUMAN
IYGYVAEQF	24200	7.28	34855.3	28972.2	25395.6	730.55	43.2	1088.52	9	0.1	545.266	88.09	10481000	1697100	3	F3:24333	MSB66430A.raw	Q9Y6A9|SPCS1_HUMAN
IYLPYLHEW	14438.9	9.69	32614.3	18204.6	21556.5	1144.69	31.84	1232.62	9	-1.4	617.318	107.22		1417300	4	F4:30391	MSB66431A.raw	Q99816|TS101_HUMAN
IYLPYLQNW	22397	16.45	36880.9	22037.6	25956.5	2545.18	38.93	1208.62	9	-0.2	605.319	111.92		1243900	3	F3:32036	MSB66430A.raw	Q8IX04|UEVLD_HUMAN
KFIDTTSKF	11079.9	70.39	19908.2	29956	11991.3	586.31	40.2	1085.58	9	-1.1	543.794	44.55	1633000	691470	2	F2:12035	MSB66429A.raw	P39023|RL3_HUMAN:Q92901|RL3L_HUMAN
KWNPTAGVAF	22593.9	187.4	19304.7	36428.1	11103.6	6819.88	43.7	1089.56	10	0	545.788	77.15	3669500	1143600	4	F4:21271	MSB66431A.raw	P19387|RPB3_HUMAN
KYAWVLDKL	8129.69	34.81	26026.2	28391.3	16618.3	1609.34	43.57	1134.64	9	-1.5	568.328	85.64		1001800	4	F4:23510	MSB66431A.raw	P68104|EF1A1_HUMAN:Q5VTE0|EF1A3_HUMAN:Q05639|EF1A2_HUMAN
KYITDWQNVF	14161.8	11.41	24850	29607.3	25431.9	743.78	48.72	1312.65	10	-2	657.329	100.58	0	2643700	3	F3:27772	MSB66430A.raw	O75340|PDCD6_HUMAN
KYTKIFNDF	24558.2	11.36	31732.2	34052	24223	995.39	45.99	1174.6	9	0.1	588.308	64.39	2260500	516150	4	F4:17752	MSB66431A.raw	Q15326|ZMY11_HUMAN
LYGKIAEAF	25412.3	16.11	27886.3	30395.1	25220.9	974.79	37.43	1010.54	9	-0.2	506.279	76.41	0	735050	1	F1:21184	MSB66428A.raw	O14908|GIPC1_HUMAN
LYIGWDKHYGF	14258	56.09	34732.9	28790.7	35881.2	3706.92	50.15	1397.68	11	-1.7	699.845	91.63	1312000	1176000	3	F3:25316	MSB66430A.raw	P25789|PSA4_HUMAN
LYLKVKGNVF	26992.7	74.02	19702.7	30368.1	26849.4	3662.87	25.37	1179.7	10	0.7	590.859	68.81	0	72536	4	F4:18941	MSB66431A.raw	P84098|RL19_HUMAN
NYTLVSHLI	12403.3	16.01	27427.8	12715.5	19384.6	1239.19	48.08	1058.58	9	0	530.295	90.16	0	1882100	4	F4:24735	MSB66431A.raw	P56192|SYMC_HUMAN
PQPDVFPLF	5923.23	257.35	38745	32382.2	15690.3	7505.61	30.54	1058.54	9	-0.8	530.279	111.43		4652900	4	F4:31918	MSB66431A.raw	Q9NY61|AATF_HUMAN
QYPVIIHLI	8943.73	11.23	33361.6	21905.2	7474.33	1374.97	32.37	1094.65	9	0	548.332	105.45	0	1692200	4	F4:29558	MSB66431A.raw	Q9BW60|ELOV1_HUMAN
RLPEEWSQW	8758.62	193.07	26906.4	30125.3	8104.84	13985.6	43.06	1229.58	9	-1.4	615.798	88.41		708380	4	F4:24189	MSB66431A.raw	P04792|HSPB1_HUMAN
RWSPVRPLVF	19334	16.47	13850.5	28669.8	4766.28	2270.82	42.43	1255.72	10	-0.2	628.867	89.29	0	995870	4	F4:24441	MSB66431A.raw	Q96EX3|DC2I2_HUMAN
RYFDPANGKF	16423.8	52.65	18610.6	28121.1	18092.2	930.03	38.92	1213.59	10	-0.6	405.536	52.82	544280	166740	4	F4:14312	MSB66431A.raw	P13639|EF2_HUMAN
RYISPDQLADL	9014.17	460.48	23249.5	34957.3	5662.42	5345.1	30.93	1289.66	11	-2.7	645.836	82.63		204840	4	F4:22664	MSB66431A.raw	P06733|ENOA_HUMAN
RYLPTGSFPF	2446.92	5.65	7538.66	20709.2	1902.74	636.25	34.83	1183.6	10	-0.4	592.808	96.99	14787000	3929200	4	F4:26596	MSB66431A.raw	Q13454|TUSC3_HUMAN
TYGEIFEKF	22331.6	6.46	36532.2	28727.5	26287.4	653.74	48.95	1132.54	9	-0.8	567.279	90.51	0	24550000	3	F3:24967	MSB66430A.raw	O95298|NDUC2_HUMAN
TYPNTYIF	25813.6	95.27	30532.2	27862.4	14470.3	828.49	29.98	1017.48	8	0	509.748	94.18		880640	4	F4:25739	MSB66431A.raw	Q8TEL6|TP4AP_HUMAN
TYQDIQNTI	16256.6	30.22	25991	16253	12611.7	702.67	35.91	1094.52	9	-0.7	548.269	65.7	1270000	641360	1	F1:18149	MSB66428A.raw	P24928|RPB1_HUMAN
TYTDVTPRQFF	24324.1	105.28	31376.1	35203.2	28000.8	1838.46	44.66	1373.66	11	-1.9	687.837	83.76		486190	4	F4:23003	MSB66431A.raw	Q9NQZ5|STAR7_HUMAN
VYEEILHQI	7707.57	47.81	31944.4	19349.8	16213.9	1457.17	40.55	1142.6	9	-5.9	572.303	81.29		50245	2	F2:22531	MSB66429A.raw	Q9BZQ8|NIBA1_HUMAN
VYLPPEAFTF	4945.15	6.67	27212	23655.3	3659.18	839.21	30.72	1182.6	10	1.2	592.306	110.02	0	2132400	4	F4:31419	MSB66431A.raw	P26358|DNMT1_HUMAN
VYSIVPQSW	32568.4	36.41	32735.9	25480.9	26141.3	2847.09	34.27	1077.55	9	-0.9	539.782	103.61	0	4562700	4	F4:28866	MSB66431A.raw	Q71RC2|LARP4_HUMAN
YYLNDLERI	2661.04	22.12	33311.1	17070.8	19896.1	1323.4	37.18	1197.6	9	0.7	599.809	89.33		304410	4	F4:24455	MSB66431A.raw	P04899|GNAI2_HUMAN:P19086|GNAZ_HUMAN
GPLPRTVELF	14832.5	3685.41	317.38	10500.5	21870.8	24663.9	41.76	1127.63	10	-0.5	564.824	93.05	0	361600	1	F1:25977	MSB66428A.raw	Q9Y2Q3|GSTK1_HUMAN
LTVPFEKHSTL	4298.75	21934.6	317.83	7470.94	3760.61	16824.5	47.12	1270.69	11	-1.5	636.352	69.13	0	24044	1	F1:19131	MSB66428A.raw	O95336|6PGL_HUMAN
MIPYQIGDVF	7148.77	3867.19	370.88	1714.2	5126.91	10677.7	42.6	1181.58	10	-1	591.796	109.45	33579000	14915000	3	F3:31049	MSB66430A.raw	Q9NQP4|PFD4_HUMAN
RPRKAFLLLL	11772.4	12894.1	5.68	5179.82	22332.3	3423.4	36.62	1225.8	10	-0.2	409.608	81.37	6006000	7238200	4	F4:22377	MSB66431A.raw	P13667|PDIA4_HUMAN
MPWFKGWKV	2981.48	15841.6	367	101.07	23141.9	15159.1	45.93	1177.61	9	0.4	393.544	96.22	902500	5451200	4	F4:26275	MSB66431A.raw	P68104|EF1A1_HUMAN:Q5VTE0|EF1A3_HUMAN:Q05639|EF1A2_HUMAN
YVPPELITL	27.38	3878.59	13445.3	20622.7	18.65	687.65	23.05	1043.59	9	-0.7	522.802	107.65	6612900	1814500	3	F3:30431	MSB66430A.raw	P49770|EI2BB_HUMAN
FSPLHALNF	7725.69	854.04	21274	22012.6	160.25	567.08	46	1044.54	9	-0.7	523.277	98.92	4985700	7176500	3	F3:27319	MSB66430A.raw	P68402|PA1B2_HUMAN:Q15102|PA1B3_HUMAN
IYDKFIAQL	4492.53	251.78	20227.6	24401.1	4567.02	177.82	39.51	1109.61	9	0.5	555.814	90.78		964640	3	F3:25016	MSB66430A.raw	Q6P1K2|PMF1_HUMAN
YYDKHFTEF	3891.41	22.7	8827.03	22660.5	2986.04	20.6	38.48	1248.55	9	-0.1	625.28	53.63	1931900	1457200	4	F4:14606	MSB66431A.raw	P38606|VATA_HUMAN
YYTDIMHTL	569.05	22.75	13923.4	16397.7	1816.87	12.3	46.04	1155.53	9	0.1	578.771	86.2	1287900	1499100	4	F4:23600	MSB66431A.raw	O15031|PLXB2_HUMAN
FKFPNRLNL	6591.58	25402.4	13268	14975.4	8095.46	154.31	40.34	1147.65	9	0.7	574.833	84.85	6718600	77243	1	F1:23553	MSB66428A.raw	P09382|LEG1_HUMAN
IRDNFVIVY	26105.2	29463.2	37641.3	34342.1	38246.4	194.77	37.65	1137.62	9	-0.2	569.816	85.87	3382000	3455800	3	F3:23762	MSB66430A.raw	Q9Y6Q5|AP1M2_HUMAN
MRYVASYLL	1959.03	2919.17	14825.5	7486.47	13606.5	43.35	41.13	1114.58	9	0.5	558.3	91.86	542340000	340760000	2	F2:25396	MSB66429A.raw	P05387|RLA2_HUMAN
YRFLPQKIIYL	771.36	9225.62	27696.2	28223.8	1484.09	411.29	54.78	1452.85	11	-0.5	727.432	101.46	27105000	7833200	3	F3:27959	MSB66430A.raw	Q9UL46|PSME2_HUMAN
YLPDSLTQL	7.61	6382.85	14317.5	26851.4	10.97	225.49	29.59	1048.54	9	0.2	525.279	100.4	1110500	262220	2	F2:27737	MSB66429A.raw	Q9BTT6|LRRC1_HUMAN
FLPSYIIDV	4.59	11713	30026	16183.4	263.26	1532.06	35.61	1065.57	9	-0.6	533.794	109.23	4325300	3953500	1	F1:32273	MSB66428A.raw	Q10570|CPSF1_HUMAN
FVDPNGKISL	233.74	26593.2	5384.75	23256.1	262.15	5731.01	25.27	1088.59	10	2.8	545.302	73.8		172600	1	F1:20467	MSB66428A.raw	Q92538|GBF1_HUMAN
ITPENLPQI	58.55	2878	28655.2	17483.9	145.02	3843.42	25.45	1023.56	9	-0.9	512.787	84.95		1121400	4	F4:23371	MSB66431A.raw	P43243|MATR3_HUMAN
LLIENVASL	12.02	10977.1	6921.95	15773.5	438.81	1117.47	34.89	970.57	9	-0.7	486.292	105.84	33443000	39889000	2	F2:29670	MSB66429A.raw	P07203|GPX1_HUMAN
SLPEVLPIL	17.06	3281.45	17563	24300.5	40.07	873.49	15.13	979.595	9	0.3	490.805	112.53		2713700	4	F4:32356	MSB66431A.raw	P23229|ITA6_HUMAN
YLPELLQTV	3.22	2808.17	22241.4	12037.8	69.14	607.48	28.46	1074.6	9	0.3	538.306	108.04		2634000	4	F4:30685	MSB66431A.raw	O14682|ENC1_HUMAN
YLQASYTYL	12.5	2183.31	6969.22	17120.2	350.1	625.34	36.66	1120.54	9	-1.1	561.279	89.97		625060	2	F2:24835	MSB66429A.raw	P02792|FRIL_HUMAN
FAYDGKDYL	29.94	24797.7	8585.88	4396.64	538.41	380.84	40.54	1090.5	9	0.2	546.256	72.56		2520300	4	F4:20049	MSB66431A.raw	P13747|HLAE_HUMAN
FQAEIAQLM	7.2	7537.03	14735.6	10437.5	3742.95	276.02	32.93	1049.52	9	-0.3	525.768	102.64		1629400	4	F4:28559	MSB66431A.raw	P07900|HS90A_HUMAN:P08238|HS90B_HUMAN:Q58FF8|H90B2_HUMAN:Q14568|HS902_HUMAN
FQDDNNLYL	5.11	15173.4	14726.5	13453.2	1655.04	259.78	25.32	1140.51	9	-2.2	571.26	82.89	0	1103700	4	F4:22746	MSB66431A.raw	Q5VT25|MRCKA_HUMAN
YQDPVTLQL	9.8	8260.83	10551	11351.3	1845.82	343.23	25.17	1075.55	9	1	538.785	95.99	1317800	2229800	3	F3:26476	MSB66430A.raw	P07942|LAMB1_HUMAN
YQTEIGQTL	12.47	6919.26	10113	13902.5	1571.01	393.6	29.78	1051.52	9	0.1	526.767	64.46		308460	2	F2:17744	MSB66429A.raw	P14324|FPPS_HUMAN
YVFPGVTRL	10.73	8965.92	6140.27	8259.85	548.24	229.75	32.82	1050.59	9	-1.1	526.3	87.59		970120	4	F4:23979	MSB66431A.raw	Q9H0A9|SPC1L_HUMAN
AIISELVSI	9.68	16528.6	14619.5	17077.1	11319.2	17431	25.37	943.559	9	-0.8	472.786	108.93		1646400	4	F4:30993	MSB66431A.raw	P78344|IF4G2_HUMAN
AIVKEIVNI	116.05	23942.1	26948.3	24176.7	24600.2	28576.5	26.09	997.617	9	1	499.816	74.52		798730	4	F4:20524	MSB66431A.raw	P43246|MSH2_HUMAN
ALPDDLVEV	5.46	22591.7	32168.1	30086.5	830.56	6045.01	30.73	969.502	9	-0.2	485.758	93.88	0	2130600	4	F4:25758	MSB66431A.raw	Q14651|PLSI_HUMAN
ALVVQVAEA	246.34	41172.7	27819	33262.2	30500.8	31384.3	32.75	898.512	9	-1.1	450.263	66.14	2390500	6476900	2	F2:18226	MSB66429A.raw	P07686|HEXB_HUMAN
AQIKEMVEL	14.37	14438.5	22686.5	30225.2	14153.6	8562.97	37.51	1059.56	9	0.3	530.789	73.65	1122900	3004500	1	F1:20439	MSB66428A.raw	P55072|TERA_HUMAN
ASFNDTFVHV	75.37	16421.5	28263.8	16197	19119.3	16247.1	57.78	1135.53	10	-0.6	568.772	77.46	134230	2056800	4	F4:21319	MSB66431A.raw	P62263|RS14_HUMAN
AVFPDDMPTL	84.16	10194.4	16106.7	22580.4	2301.82	9350.54	14.87	1104.52	10	-0.5	553.265	106.69		2216300	4	F4:30095	MSB66431A.raw	Q03164|KMT2A_HUMAN
AVFQEAAEV	40.76	33966.2	19340.4	16477	11672.7	15144.7	19.43	962.471	9	-0.4	482.243	65.22		1153000	4	F4:17857	MSB66431A.raw	O00212|RHOD_HUMAN
AVIDVGINRV	33.99	36200.6	27938.8	25533.1	30923.8	29743.5	35.24	1054.61	10	-0.3	528.314	68.45	109770	868050	2	F2:18892	MSB66429A.raw	P13995|MTDC_HUMAN
AVIGDVIRV	8.71	31411.5	27385.4	19497.6	22171.5	18192.5	37.09	940.571	9	0.1	471.293	78.2	279850	3338400	4	F4:21583	MSB66431A.raw	Q9NR30|DDX21_HUMAN
AVIPRLVQL	22.48	14580	2896.65	22535.3	2347.01	2406.04	34.41	1007.65	9	-0.3	504.832	90.58		7564700	4	F4:24777	MSB66431A.raw	P14923|PLAK_HUMAN
EVISKLYAV	14.41	18875.5	11552.4	10066.5	19228.6	10161.5	30.76	1020.59	9	-2.4	511.299	72.82		492530	1	F1:20192	MSB66428A.raw	P50990|TCPQ_HUMAN
FAISILQQI	10.96	9234.21	15710.8	1755.95	5359.41	3265.61	33.69	1031.6	9	-0.9	516.808	110.24	3488900	2204900	1	F1:32665	MSB66428A.raw	P60842|IF4A1_HUMAN
FAISILQQL	16	12281.9	8445.93	5804.65	2138.22	796.52	33.69	1031.6	9	-0.9	516.808	110.24	3488900	2204900	1	F1:32665	MSB66428A.raw	Q14240|IF4A2_HUMAN
FALPGLLHA	17.31	34011.1	15923	4202.27	15590.9	8566.12	34.96	937.538	9	0	469.776	100.43	4631300	224770000	4	F4:27732	MSB66431A.raw	Q13751|LAMB3_HUMAN
FANDGSFLEL	104.49	21300.5	7819.12	7874.22	2300.47	2532.93	14.7	1111.52	10	-1.1	556.766	107.94		1733700	4	F4:30626	MSB66431A.raw	Q9BQ61|TRIR_HUMAN
FGANAILGV	26.97	25871.8	22149.5	7171.94	10915.3	10353.9	16.37	860.476	9	-0.3	431.245	96.55	275710	973180	3	F3:26623	MSB66430A.raw	P06733|ENOA_HUMAN:P13929|ENOB_HUMAN:P09104|ENOG_HUMAN
FGFEITHEV	8.78	15752	18326.5	1000.8	4196.05	1373.51	43.16	1077.51	9	-0.7	539.763	84.65	276900	1053600	3	F3:23400	MSB66430A.raw	O96015|DNAL4_HUMAN
FIAKSFYDL	15.28	5928.36	5592.45	14034.5	1881.14	3777.74	40.56	1102.57	9	0.3	552.292	89.32	18164000	10578000	3	F3:24567	MSB66430A.raw	P18283|GPX2_HUMAN
FILPDSLPLDTL	69.78	23699.1	14818.5	18217.2	8141.93	19958.4	52.81	1342.74	12	-0.7	672.376	113.04	0	40495000	1	F1:33704	MSB66428A.raw	P62314|SMD1_HUMAN
FLDGNELTL	20.3	16711.9	12368.4	17944.5	1013.61	1371.19	25.16	1020.51	9	0	511.264	102.55	1918300	1403000	1	F1:29294	MSB66428A.raw	O00299|CLIC1_HUMAN
FLEKLLPPV	4.62	24940.5	16087.9	11075.1	9473.04	11059.8	40.17	1054.64	9	-0.6	528.328	101.49	0	2896900	3	F3:28047	MSB66430A.raw	O95372|LYPA2_HUMAN
FLLDALSED	365.91	39294.6	36285.6	33170.5	36821.2	32945.5	33.68	1021.5	9	0.3	511.756	106.02	53159000	31895000	3	F3:29678	MSB66430A.raw	P20810|ICAL_HUMAN
FLLDALSEDF	209.99	6144.73	20763.5	22121.9	17388.7	8538.17	46.18	1168.57	10	0.8	585.29	113.25	17740000	5071800	3	F3:32514	MSB66430A.raw	P20810|ICAL_HUMAN
FLQEGDLISA	23.18	36216.2	24746	22359.4	26941.6	25069.1	38.42	1091.55	10	-0.4	546.782	89.29		4815900	4	F4:24421	MSB66431A.raw	Q13868|EXOS2_HUMAN
FQDEINWRL	3.33	6452.77	20062.5	8564.18	6855.25	854.93	46.34	1219.6	9	-1.2	610.806	94.95	6806600	4807300	4	F4:25994	MSB66431A.raw	P51784|UBP11_HUMAN
FQDPVPLTV	6.25	13867.9	20908.5	5759.17	5253.59	1144.25	30.64	1014.54	9	0.8	508.277	99.08	175760	7859600	2	F2:27322	MSB66429A.raw	O15164|TIF1A_HUMAN
FQTTVTAQIL	161.81	21081.3	19715.5	19209.7	10160.6	7831.99	46.87	1120.61	10	-0.6	561.313	91.7		643250	1	F1:25614	MSB66428A.raw	Q9UBQ5|EIF3K_HUMAN
FRVPTANVSV	248.5	27075.2	20557.8	20617.1	1172.22	1498.08	41.26	1088.6	10	-0.5	545.306	74.69	361110	1744900	1	F1:20781	MSB66428A.raw	P04406|G3P_HUMAN
FSLIAGLTIA	48.74	33274.4	22158.8	14391.8	29246.9	28742.1	38.1	1004.59	10	-1.2	503.302	112.02	18128000	5225600	2	F2:32223	MSB66429A.raw	P60903|S10AA_HUMAN
FTVDKDITL	33.24	22925.8	13716.1	15680.1	747.96	1752.19	35.48	1050.56	9	-1.9	526.286	77.95	44587	725480	4	F4:21427	MSB66431A.raw	P33176|KINH_HUMAN
FVADGIFKA	3.64	31759.7	20352.2	11600.1	20468.6	7479.02	37.54	966.517	9	-1.2	484.265	75.42		296100	4	F4:20793	MSB66431A.raw	P23396|RS3_HUMAN
FVDDYTVRV	5.01	26471.8	20704.5	9223.72	4442.3	2373.44	49.31	1112.55	9	-0.9	557.282	67.48	1955600	3628400	4	F4:18573	MSB66431A.raw	O00487|PSDE_HUMAN
FVDPAQITM	36.29	21021.7	5921.18	12687.4	1262.81	1032	43.41	1020.5	9	-0.3	511.255	90.58		1758200	4	F4:24792	MSB66431A.raw	P23921|RIR1_HUMAN
FVDRGFYSV	2.8	12581.7	8168.22	7662.83	3573.38	3960.05	15.8	1088.53	9	0.9	545.272	67.77		156300	4	F4:18659	MSB66431A.raw	P60510|PP4C_HUMAN
FVFPGELLL	8.64	7698.9	11158.9	3294.15	1186.55	524.75	32.82	1033.58	9	0.2	517.8	115.5	7027900	14807000	4	F4:33491	MSB66431A.raw	Q15758|AAAT_HUMAN
FVIRNIVEA	6.6	30224.9	13377	12148.6	12368	7070.77	42.81	1059.61	9	-0.8	530.811	76.43	0	2029900	4	F4:21052	MSB66431A.raw	P62854|RS26_HUMAN:Q5JNZ5|RS26L_HUMAN
FVLPELPSV	2.06	16944.4	14404.7	3528.39	4550.15	3321.09	38.12	999.564	9	-0.5	500.789	110.12		8082100	4	F4:31440	MSB66431A.raw	P53990|IST1_HUMAN
FVNDIFERI	8.47	9658.61	23526.1	3670.8	8977.86	3097.86	48.21	1151.6	9	-1.3	576.805	100.25	0	38398000	3	F3:27668	MSB66430A.raw	P62807|H2B1C_HUMAN:Q16778|H2B2E_HUMAN:Q99879|H2B1M_HUMAN:Q93079|H2B1H_HUMAN:Q5QNW6|H2B2F_HUMAN:Q99877|H2B1N_HUMAN:P58876|H2B1D_HUMAN:P33778|H2B1B_HUMAN:P23527|H2B1O_HUMAN:Q99880|H2B1L_HUMAN:Q8N257|H2B3B_HUMAN:O60814|H2B1K_HUMAN:P06899|H2B1J_HUMAN:P57053|H2BFS_HUMAN
FVVDEVSNI	10.42	23161.9	20868.2	10794.5	6712.19	6320.79	35.82	1020.51	9	-1.5	511.263	88.44		212290	1	F1:24575	MSB66428A.raw	P63172|DYLT1_HUMAN
GIYTGFIKV	14.73	29264	29318.8	16726.5	25440.7	20745.3	33.42	996.564	9	-0.3	499.289	91.22	0	3388600	2	F2:25207	MSB66429A.raw	Q86WH2|RASF3_HUMAN
GLIEILKKV	11.96	34187.8	35570.4	23506.5	30745.4	19616.3	36.76	1011.67	9	0.7	506.842	93.24		1039300	1	F1:26037	MSB66428A.raw	O14737|PDCD5_HUMAN
GQDVGRYQV	205.45	28762	28570.1	29836	30307.4	26165.4	40.48	1020.5	9	-0.8	511.256	37.9	143150	140890	1	F1:10176	MSB66428A.raw	P51571|SSRD_HUMAN
GQFGVGFYSA	21.98	23310.5	29980.6	22177.8	39684.3	29918.7	45.66	1031.47	10	0.3	516.743	88.41	0	7557700	3	F3:24405	MSB66430A.raw	P07900|HS90A_HUMAN:P08238|HS90B_HUMAN:P14625|ENPL_HUMAN:Q58FF6|H90B4_HUMAN:Q12931|TRAP1_HUMAN
GQISEVVVV	15.96	25350.6	33957.4	22516	27723.2	15498.6	35.3	928.523	9	-0.2	465.269	75.43		4394000	4	F4:20731	MSB66431A.raw	Q14011|CIRBP_HUMAN
GQSELTLLL	22.39	10377	22401.1	17432.7	17067.1	4888.07	27.67	972.549	9	0.3	487.282	108.5	3844600	2555700	3	F3:30744	MSB66430A.raw	Q7L1Q6|BZW1_HUMAN
GQVDMDIKL	82.89	31323.9	34100.3	28993.6	30970.7	19472.3	32.8	1017.52	9	2.4	509.767	73.82	0	209360	4	F4:20278	MSB66431A.raw	O43896|KIF1C_HUMAN
GQVGGQVSV	21.59	33262.5	25782.4	24716.2	26831.1	22194.8	36.44	829.429	9	0	415.722	34.57	12447000	6090600	3	F3:9178	MSB66430A.raw	#CONTAM#IPI:CON_IPI00479145.2|SWISS-PROT:P08727:P08727|K1C19_HUMAN
GQWASVIRV	6.74	20619.8	33447.3	14955.1	33820.7	17514.4	39.53	1014.56	9	-4	508.286	79.4		402600	4	F4:21836	MSB66431A.raw	Q15393|SF3B3_HUMAN
GTVEQIVYL	21.46	25444.2	26240	27637.8	10052.6	8193.36	35.06	1020.55	9	-0.9	511.281	97.32		1629100	4	F4:26720	MSB66431A.raw	P52292|IMA1_HUMAN
GVIDLIFEKA	33.7	39669.7	34605.4	28584.6	43783.8	37243.5	33.88	1103.62	10	1.6	552.819	107.48		1675100	4	F4:30490	MSB66431A.raw	Q04637|IF4G1_HUMAN
GVIQDFINA	56.32	39356.8	29069.3	29478.8	37747.3	34312	37.88	975.503	9	0.3	488.759	104.16	804430	2701800	1	F1:30064	MSB66428A.raw	P78527|PRKDC_HUMAN
GVLPNIQAV	11.36	29620.4	16202.8	17702.6	11637	12228.8	43.46	909.528	9	-0.9	455.771	90.23		2556800	4	F4:24709	MSB66431A.raw	P04908|H2A1B_HUMAN:Q6FI13|H2A2A_HUMAN:Q7L7L0|H2A3_HUMAN:Q93077|H2A1C_HUMAN:P0C0S8|H2A1_HUMAN:P20671|H2A1D_HUMAN:Q96QV6|H2A1A_HUMAN:Q16777|H2A2C_HUMAN:Q99878|H2A1J_HUMAN:Q96KK5|H2A1H_HUMAN:Q9BTM1|H2AJ_HUMAN:P16104|H2AX_HUMAN:Q8IUE6|H2A2B_HUMAN
GVVPQLVKL	170.27	29704.5	18440.5	28199.7	17795.8	14833.1	34.71	951.612	9	0.1	476.813	88.81		3784200	1	F1:24656	MSB66428A.raw	P52292|IMA1_HUMAN
IIDDTIFNL	15.33	17398.2	21982.6	18438.7	5058.2	6280.3	35.06	1062.56	9	-0.3	532.287	109.94	3522600	6098000	3	F3:31304	MSB66430A.raw	O15118|NPC1_HUMAN
IITKDLFQV	10.28	19945	30521.3	11870.9	26226	21133.2	34.46	1075.63	9	0.1	538.821	87.08		2370400	4	F4:23821	MSB66431A.raw	Q14204|DYHC1_HUMAN
ILLKDILSV	7.02	16931	24927.1	9168.6	14037.1	11437.8	26.3	1012.65	9	0.2	507.334	105.75	1755500	1672600	1	F1:30796	MSB66428A.raw	Q13315|ATM_HUMAN
IQINVGTTV	21.32	15292	22130.8	12487.1	11678.7	9445.09	33.2	943.534	9	0.1	472.774	72.94	892730	923670	4	F4:20116	MSB66431A.raw	P46379|BAG6_HUMAN
ITLEDLEQL	45.8	16621.7	30117.5	21785.6	12385	13657.9	30.18	1072.57	9	1.3	537.291	108.59		1625000	1	F1:32045	MSB66428A.raw	Q15121|PEA15_HUMAN
ITVEKIIKI	233.13	11374.9	30169.7	13345.9	9548.26	11107.5	25.52	1055.7	9	-0.9	528.855	70.63	102250	621360	4	F4:19398	MSB66431A.raw	Q15149|PLEC_HUMAN
KIFDEILVNA	54.82	31707.8	30524	24978.4	34688.2	27941.2	44.65	1160.64	10	-1	581.329	91.71	1064500	2439400	4	F4:25059	MSB66431A.raw	P11388|TOP2A_HUMAN:Q02880|TOP2B_HUMAN
KQLDDLKVEL	47.95	25658.2	25760.6	33341.8	20071.2	19635.8	30.06	1199.68	10	-0.7	400.899	66.2		846950	4	F4:18145	MSB66431A.raw	P42766|RL35_HUMAN
KQVEEIFNL	3.5	4073.52	29659.2	18925.8	17449.7	5113.17	41.24	1118.6	9	-1	560.305	86.1		6826400	4	F4:23573	MSB66431A.raw	P78347|GTF2I_HUMAN
KVLDFEHFL	8.38	8686.71	20779	15637.7	9133.36	5364.57	39.96	1146.61	9	-0.2	574.311	98.72	474790	4562900	2	F2:27290	MSB66429A.raw	P60660|MYL6_HUMAN
KVLNNMEIGTSL	497.78	26572	3228.76	32265.7	17808.9	27322.4	42.99	1317.7	12	-2.1	659.854	78.53	367490	225110	1	F1:21726	MSB66428A.raw	P00558|PGK1_HUMAN
KVLPGVDALSNI	306.68	22032.1	24030.1	21589.2	24862.7	34948.6	51.55	1224.71	12	-0.7	613.361	88.87	14711000	16087000	4	F4:24419	MSB66431A.raw	P00558|PGK1_HUMAN
KVPEIEVTV	34.26	14142.2	26524	17988.8	615.46	8977.57	34.71	1012.58	9	-0.7	507.297	69.35	442300	782270	3	F3:19150	MSB66430A.raw	P78347|GTF2I_HUMAN
LILDPIFKV	5.58	21063.6	29294.4	6914.76	22695	14149.4	18.68	1056.66	9	1.8	529.337	106.46		3156500	1	F1:31158	MSB66428A.raw	P13639|EF2_HUMAN
LLGPRLVLA	127.74	30461.3	24977.8	18308.7	24378.9	16790.7	28.15	950.628	9	-0.6	476.321	84.19	827960	2679400	4	F4:23117	MSB66431A.raw	P49755|TMEDA_HUMAN
LLLDVPTAAV	20.07	32520.5	15648.4	14074.2	16471.2	23048.9	24.73	1010.6	10	-1.5	506.307	105.04		2232200	4	F4:29453	MSB66431A.raw	P13284|GILT_HUMAN
LQIQQGLQTL	184.18	16095.4	12200.4	24101.2	14437.9	16012.2	38.39	1140.65	10	-2.8	571.331	89.28		767720	1	F1:24795	MSB66428A.raw	Q9UMX0|UBQL1_HUMAN:Q9NRR5|UBQL4_HUMAN
LTAPALALA	31.63	26961.5	16102.3	12540	15509.7	17540.2	17.15	839.512	9	0.3	420.763	87.59		1106000	4	F4:23944	MSB66431A.raw	Q06481|APLP2_HUMAN
MVLLESEQFL	188.98	23370.1	21170.5	17775.4	17709.5	23781.3	52.81	1207.62	10	-1.7	604.814	109.57	27651000	10920000	4	F4:31237	MSB66431A.raw	P37108|SRP14_HUMAN
NIIPRFVQV	10.4	17708.4	13267.1	8930.68	6645.5	3330.92	31.74	1084.64	9	-1.1	543.326	91.2	1686700	5050400	4	F4:25036	MSB66431A.raw	O75044|SRGP2_HUMAN:P0DMP2|SRG2B_HUMAN:P0DJJ0|SRG2C_HUMAN
NLAEKLIGV	9.18	30020.8	25178.3	17686.2	13483.8	10717.8	22.28	955.57	9	-0.3	478.792	85.64		643270	2	F2:23727	MSB66429A.raw	Q86X10|RLGPB_HUMAN
NLLAHFINA	41.55	29989	27370.6	15782.5	29103.6	18806	35.75	1011.55	9	-1.1	506.782	96.5	57680	273950	3	F3:26563	MSB66430A.raw	Q9NZJ7|MTCH1_HUMAN
NLLPKLHIV	19.34	17140.6	23977.9	12365.2	14681.8	7434.65	39.01	1045.66	9	-1	523.839	81.04		1688000	4	F4:22249	MSB66431A.raw	O00299|CLIC1_HUMAN:Q9Y696|CLIC4_HUMAN
NQTPVTLQV	79.33	20465.1	26255.6	9074.84	20742.4	5363.58	29.92	998.54	9	-0.6	500.277	70.79	0	167180	1	F1:19519	MSB66428A.raw	P26368|U2AF2_HUMAN
NVIDNLIVA	49.86	37244.2	19990.2	18987.1	23312.8	13079.9	33.02	969.549	9	-0.8	485.782	102.5	4589900	26159000	4	F4:28441	MSB66431A.raw	Q12905|ILF2_HUMAN
NVLGKLLSV	9.71	22609.5	9843.98	9047.88	13276.5	7242.66	30.87	941.591	9	0.1	471.803	101.48	831290	395600	4	F4:28051	MSB66431A.raw	P53355|DAPK1_HUMAN
NVPEGLLATV	86.21	24066.8	6442.73	7161.08	4917.25	18942.2	29.75	1011.56	10	-2.1	506.786	98.54		646470	4	F4:27106	MSB66431A.raw	P05023|AT1A1_HUMAN:P50993|AT1A2_HUMAN:P13637|AT1A3_HUMAN:P54707|AT12A_HUMAN:Q13733|AT1A4_HUMAN
NVVEQFLQA	120.66	37139.2	23832.5	17858.8	30520.6	18878	35.69	1046.54	9	-1.4	524.276	104.31	542850	6097400	1	F1:30126	MSB66428A.raw	Q14258|TRI25_HUMAN
QLVDIIEKV	13.03	30741	35573.5	14122.6	27498.8	18272.5	38.96	1055.62	9	-0.7	528.818	92.01	0	10355000	4	F4:25103	MSB66431A.raw	P61289|PSME3_HUMAN
RAADVLVYL	13.39	9984.93	2518.29	8052.3	1614.5	990.34	22.2	1018.58	9	-0.5	510.298	92.21	0	2200600	3	F3:25426	MSB66430A.raw	Q9BZ68|FR8P1_HUMAN:Q9BZ67|FRMD8_HUMAN
RIIDVVYNA	8.45	23621.3	19945.7	15263.1	28748.4	14741.2	39.04	1061.59	9	-0.8	531.8	65.27		5064300	4	F4:17841	MSB66431A.raw	P62241|RS8_HUMAN
RLASYLDRV	7.97	15223.4	22719.9	17170.7	13787.9	14420.6	35.7	1091.61	9	0.2	546.812	63.42		562910	1	F1:17426	MSB66428A.raw	P05783|K1C18_HUMAN
RVADILTQL	13.29	10574.4	991.89	17304.6	2747.02	2367.26	34.92	1027.6	9	0.8	514.809	88.65	0	1049100	4	F4:24288	MSB66431A.raw	Q9BZZ5|API5_HUMAN
RVFIGNLNTL	157.12	724.27	3312.05	18771	6882.3	5060.99	39.35	1145.66	10	-0.1	573.835	85.06		1219700	4	F4:23286	MSB66431A.raw	P07910|HNRPC_HUMAN:O60812|HNRC1_HUMAN:B2RXH8|HNRC2_HUMAN:P0DMR1|HNRC4_HUMAN:B7ZW38|HNRC3_HUMAN
RVLDELTLA	19.17	33078.4	20971.2	21435.8	32362.2	22881	33.18	1028.59	9	0.1	515.301	75.86	619380	1513600	4	F4:20959	MSB66431A.raw	#CONTAM#IPI:CON_IPI00479145.2|SWISS-PROT:P08727:P08727|K1C19_HUMAN:#CONTAM#IPI:CON_IPI00290077.1|SWISS-PROT:P19012:P19012|K1C15_HUMAN:#CONTAM#IPI:CON_IPI00230365.5|SWISS-PROT:Q9QWL7:#CONTAM#IPI:CON_00230365.5|SWISS-PROT:Q9QWL7:#CONTAM#IPI:CON_00225378.3|TREMBL:A2A4G1:#CONTAM#IPI:CON_00112947.1|SWISS-PROT:P19001:Q04695|K1C17_HUMAN:#CONTAM#IPI:CON_IPI00450768.7|SWISS-PROT:Q04695:#CONTAM#IPI:CON_001…
SIIGRLLEV	3.89	16161	5905.57	11265.8	4008.07	2286.5	30.69	998.612	9	0.3	500.314	105.2	21796000	58962000	1	F1:30490	MSB66428A.raw	P62136|PP1A_HUMAN
SIIPPLFTV	3.22	8565.84	11903	6109.06	4946.07	5139.13	34.36	985.585	9	0.3	493.8	112.02	5367400	6127500	1	F1:33318	MSB66428A.raw	P51571|SSRD_HUMAN
SLAQYLINV	4.57	22807	26028.5	15633.2	10281.8	9509.08	43.46	1019.57	9	-0.3	510.79	108.68	0	3818300	4	F4:30902	MSB66431A.raw	Q15366|PCBP2_HUMAN
SLFPGKLEV	12.35	20001.2	13723.6	7450.67	2855.08	2339.66	23.68	988.559	9	0.2	495.287	88.93		1220500	4	F4:24366	MSB66431A.raw	Q13045|FLII_HUMAN
SLIADLEQL	17.27	17189.4	21876	27077.2	8142.01	9741.52	26.7	1000.54	9	-0.3	501.279	111.33		412940	4	F4:31878	MSB66431A.raw	Q8WUP2|FBLI1_HUMAN
SLINVGLISV	7.95	29804.7	20667.1	18653.8	22602.4	24213.3	34.33	1013.61	10	-1.7	507.812	110.43	2211300	1598200	4	F4:31556	MSB66431A.raw	Q92688|AN32B_HUMAN
SLIRNLEQL	38.03	6747.37	14949.3	26224.1	4347.87	5714.11	33.33	1084.62	9	-2.6	543.318	90.94	676210	755490	3	F3:25068	MSB66430A.raw	Q15833|STXB2_HUMAN
SLLDIIEKV	5.39	22402	33759.6	11353.5	18471.6	9802.1	30.18	1028.61	9	-1.2	515.312	109.89	1184200	1093500	3	F3:31281	MSB66430A.raw	P49815|TSC2_HUMAN
SLLENLEKI	14.75	8199.75	31399.9	14421.5	12750.8	13345	27.13	1057.6	9	4.6	529.811	103.65	1130600	2041200	4	F4:28879	MSB66431A.raw	P07910|HNRPC_HUMAN:O60812|HNRC1_HUMAN:B2RXH8|HNRC2_HUMAN:P0DMR1|HNRC4_HUMAN:B7ZW38|HNRC3_HUMAN
SLNVADLTSL	230.09	27162.9	10488.5	30459.6	10335	22991.9	45.1	1031.55	10	0	516.782	105.75	8277400	5223200	1	F1:30741	MSB66428A.raw	Q9UL46|PSME2_HUMAN
SQHGVIIQL	31.33	14762.2	17158.2	18698.2	13125.5	1873.4	20.06	993.561	9	-0.5	497.787	75.41		738270	1	F1:20875	MSB66428A.raw	Q9P2R3|ANFY1_HUMAN
SQIEADFRL	7.58	9679.63	23333	15663	13835.7	6103.58	37.45	1077.55	9	0.2	539.78	80.03	1013900	33409000	2	F2:22213	MSB66429A.raw	P11387|TOP1_HUMAN
SQIHDIVLV	3.54	14777.6	30770.3	13839	19957.3	10342.4	30.26	1022.58	9	-1.7	512.294	78.01		273130	1	F1:21577	MSB66428A.raw	P11142|HSP7C_HUMAN
SQVDVAVKI	45.57	17344.5	30217.3	13267.1	23140.9	11431.6	30.29	957.549	9	0.1	479.782	55.91	358390	604760	4	F4:15275	MSB66431A.raw	P54278|PMS2_HUMAN
SQYPEIIFL	8.39	8030.29	25951.4	13631.8	4308.62	710.67	27.97	1108.58	9	0.5	555.298	110.89	4981300	8839200	1	F1:32880	MSB66428A.raw	Q9BQ52|RNZ2_HUMAN
STIRLLTSL	35.44	7116.59	2052.27	18727.4	2402.56	7681.84	32.84	1002.61	9	-1	502.31	90.63		4316800	4	F4:24872	MSB66431A.raw	P49368|TCPG_HUMAN
STLHLVLRL	188.14	8952.06	15665.3	18438.7	13069.1	9855.7	50.76	1050.65	9	-0.3	351.226	86.75	5949400	901720	2	F2:23988	MSB66429A.raw	P62987|RL40_HUMAN:P62979|RS27A_HUMAN:P0CG47|UBB_HUMAN:P0CG48|UBC_HUMAN
STVKVLIRL	192.59	14314	18297.6	22947.4	14448.5	15284.4	20.83	1027.68	9	-0.9	514.845	65.92		175910	4	F4:18060	MSB66431A.raw	Q12905|ILF2_HUMAN
SVHKGFAFV	9.88	14672.1	7628.83	10704.2	7023.57	8156.83	32.51	990.529	9	0.5	496.272	47.1	197780	896560	4	F4:12622	MSB66431A.raw	P07910|HNRPC_HUMAN:O60812|HNRC1_HUMAN:B2RXH8|HNRC2_HUMAN:P0DMR1|HNRC4_HUMAN:B7ZW38|HNRC3_HUMAN
SVIDHIHLI	4.36	2196.56	14019.1	6239.45	3175.3	963.52	33.47	1045.59	9	1.6	523.804	81.02		1738700	4	F4:22250	MSB66431A.raw	O14908|GIPC1_HUMAN
SVIEQIVYV	2.42	19371.2	21059	9520.41	6234.19	2348.36	43.49	1048.58	9	0.2	525.298	104.33		4315400	4	F4:29142	MSB66431A.raw	Q00653|NFKB2_HUMAN
SVITQVFHV	4.56	13199.1	20808.7	8218.04	14750.2	6886.47	43.67	1028.57	9	-0.1	515.29	96.64		1348400	1	F1:27232	MSB66428A.raw	Q00341|VIGLN_HUMAN
SVLKSLVEI	21.27	9779.75	11345.9	11533.7	10242.5	15464.6	34.34	986.601	9	-0.4	494.308	91.04	5090200	4841500	2	F2:25148	MSB66429A.raw	O00410|IPO5_HUMAN
SVLNVLHSL	10.99	7213.65	2147.84	15473.3	5051.96	3720.7	32.82	980.566	9	0	491.29	99.01		242420	1	F1:28057	MSB66428A.raw	Q9Y262|EIF3L_HUMAN
TAIDILTTV	7.26	23974.5	14388.5	3373.17	6151.31	4545.33	18.29	945.538	9	-0.7	473.776	104.66		785000	4	F4:29280	MSB66431A.raw	Q96P70|IPO9_HUMAN
TALLKIEGV	328.72	33240.2	27169.7	10590.5	22767.3	23652	28.13	942.575	9	0	472.295	75.27	0	641560	4	F4:20660	MSB66431A.raw	P18077|RL35A_HUMAN
TAMDVVYAL	15.42	7891.79	1372.22	4075.59	1749.56	725.83	39.59	981.484	9	-0.8	491.749	102.09	0	1857500	1	F1:29162	MSB66428A.raw	P62805|H4_HUMAN
TILPAIILV	9.93	18068.6	28379	8228.99	18000.5	14667.8	22.38	951.637	9	-0.5	476.825	113.63	1240400	2402100	4	F4:32788	MSB66431A.raw	P00403|COX2_HUMAN
TILPKVMQV	20.08	22193.8	18678	9690.74	9371.19	5961.61	19.29	1027.61	9	0.9	514.813	80.43		82700	4	F4:22133	MSB66431A.raw	P55081|MFAP1_HUMAN
TILRLLQQV	21.8	23719.4	22830.8	11880.5	24492.4	23368.1	38.68	1082.68	9	-0.1	542.348	103.33	0	3749300	4	F4:28749	MSB66431A.raw	Q14152|EIF3A_HUMAN
TLIEDILGV	3.46	28150	30697.5	14173.9	15659.1	10583.9	39.08	971.554	9	-0.5	486.784	113.61	9194600	19031000	1	F1:33962	MSB66428A.raw	Q8TEL6|TP4AP_HUMAN
TQTPWLPVL	34.16	6236.82	15989	13294.2	7215.76	1722.19	35.95	1053.59	9	-0.6	527.8	110.61	2378400	2604100	3	F3:31499	MSB66430A.raw	Q9UNE0|EDAR_HUMAN
TTYEGIFKTL	97.3	1671.89	17101.3	18433.3	7550.01	4970.31	43.04	1171.61	10	1.2	586.814	92.61	394130	1273100	4	F4:25336	MSB66431A.raw	Q8WWM7|ATX2L_HUMAN
TVIDQIPFL	8.01	14911.8	18700.9	16521.7	4499.34	1731.54	26.5	1044.59	9	0.1	523.3	111.64	2790700	6553300	4	F4:32012	MSB66431A.raw	O15297|PPM1D_HUMAN
TVLQELINV	11.15	27282.5	29858.9	14053.8	24687.1	22475.1	30.99	1027.59	9	-1.4	514.802	109.92		3085200	4	F4:31383	MSB66431A.raw	P52732|KIF11_HUMAN
TVTTVILEV	35.73	28244.3	22401.8	9981.9	18613.1	11238.9	39.49	973.57	9	-1.3	487.791	99.61	454030	5032500	4	F4:27465	MSB66431A.raw	Q9UKF6|CPSF3_HUMAN
VIIKGLEEI	30.02	9463.92	20485.7	14217.3	10557.8	17481.1	32.08	1012.62	9	-0.9	507.315	80.53	228210	2162900	4	F4:22110	MSB66431A.raw	P52732|KIF11_HUMAN
VLIPKLPQL	12.45	4180.82	12507.7	17170.8	1173.56	1070.83	26.01	1019.67	9	-0.9	510.844	103.4	4273600	11100000	3	F3:28706	MSB66430A.raw	Q8N138|ORML3_HUMAN
VLKVFLENV	120.69	24720	34821	17924.5	25399.7	20641	48.67	1059.63	9	-0.8	530.823	92.89	0	155120	1	F1:25869	MSB66428A.raw	P62805|H4_HUMAN
VLLESEQFL	50.84	16892.4	28765.5	23589.6	4909.49	8869.34	43.99	1076.58	9	-0.4	539.295	104.03	288000000	71205000	1	F1:30023	MSB66428A.raw	P37108|SRP14_HUMAN
VLLESEQFLTEL	176.75	30134.4	32105.5	33763.6	19796.7	27657	61.45	1419.75	12	-1.1	710.881	111.28	480460000	127540000	4	F4:31856	MSB66431A.raw	P37108|SRP14_HUMAN
VQIGDIVTV	3.93	13305.1	29556.7	11910.1	14829.6	8343.92	32	942.539	9	-0.7	472.276	96.6	8000200	9316600	3	F3:26636	MSB66430A.raw	P62280|RS11_HUMAN
VQLAIFANM	47.53	4383.1	23078.1	19638	16791.1	8760.52	36.47	1005.53	9	-1.1	503.773	109.67		1881300	4	F4:31281	MSB66431A.raw	P0C6T2|OST4_HUMAN
VQVDGKIGL	125.7	30903.8	24194	30379.6	14179.7	12927.2	30.43	927.539	9	0.2	464.777	55.18		3753100	2	F2:15006	MSB66429A.raw	Q9NZJ7|MTCH1_HUMAN
VQVEDIVFL	9.25	13969.4	31349	21710	11681.1	4290.71	39.82	1060.58	9	-0.7	531.297	110.63	721810	2294800	4	F4:31623	MSB66431A.raw	Q15543|TAF13_HUMAN
VTFLGALAL	315.94	13097	5588.65	13328.3	2373.9	6774.58	33.79	903.543	9	-0.4	452.779	112.59	86563000	90282000	4	F4:32339	MSB66431A.raw	P06703|S10A6_HUMAN
WQIGKIGTVM	292.44	20850.6	7564.48	24674.6	20756.1	8147.65	48.9	1131.61	10	-1.3	566.812	92.68		2800700	1	F1:25853	MSB66428A.raw	P30046|DOPD_HUMAN
WVDPNSPVL	51.7	20814.6	2618.2	13144	875.64	1479.97	35.05	1025.52	9	0.6	513.767	86.15		188570	1	F1:23945	MSB66428A.raw	P17516|AK1C4_HUMAN:P42330|AK1C3_HUMAN:Q04828|AK1C1_HUMAN:P52895|AK1C2_HUMAN
YGIPAIVKL	470.47	9084.08	16281.9	10354.5	2024.32	2109.15	38.31	972.601	9	-0.2	487.308	96.91	0	9965900	4	F4:26474	MSB66431A.raw	P14923|PLAK_HUMAN
YIPTELDQV	20.15	20048.7	32164	22974.5	1418.64	10680.5	43.27	1076.54	9	-0.9	539.276	82.93		4461000	4	F4:22711	MSB66431A.raw	Q7L2H7|EIF3M_HUMAN
YLDPSVLSGV	8.75	19432.5	19175.8	17343.9	3790.39	9603.9	40.08	1048.54	10	-0.7	525.279	97.32		11714000	4	F4:26623	MSB66431A.raw	Q15041|AR6P1_HUMAN
YLKDFFSNV	6.09	14083.7	17158.8	9514.74	3613.07	1195.72	39.05	1131.56	9	-1.9	566.786	93.82	307890	149500	4	F4:25673	MSB66431A.raw	O95786|DDX58_HUMAN
YLLPAIVHI	3.72	2498.64	23101.1	4862.75	4219.95	2483.65	39.93	1037.63	9	-1.1	519.82	106.9		22819000	4	F4:30208	MSB66431A.raw	Q92841|DDX17_HUMAN:P17844|DDX5_HUMAN
YLLPKDIKL	17.58	8168.31	16100.6	14577.6	1811.23	1110.65	33.21	1101.68	9	-1.3	368.233	85.45	1577600	3352500	1	F1:23688	MSB66428A.raw	Q6T310|RSLBA_HUMAN
YQAPDIDVQL	36.38	17379.1	20779.2	20409.4	956.09	5036.14	41.13	1160.57	10	0.3	581.293	96.04	6004400	7175400	3	F3:26419	MSB66430A.raw	Q9NZM5|NOP53_HUMAN
YQLDAKLQL	10.56	9565.22	15011.5	14498	5986.18	958	24.66	1090.6	9	1.8	546.309	84.13	251530	295630	1	F1:23333	MSB66428A.raw	O15031|PLXB2_HUMAN
YSIDLSERV	19.7	21069	27692.6	6805.88	8539.66	6857.77	33.93	1080.55	9	1.4	541.281	69.43	0	259250	2	F2:19192	MSB66429A.raw	Q6NTF9|RHBD2_HUMAN
YVDDFGVSV	6.78	26225.2	12121.9	11832.8	2328.07	2871.62	33.26	999.455	9	-1.5	500.734	88.88	0	804180	4	F4:24359	MSB66431A.raw	Q93063|EXT2_HUMAN
YVITDLTQL	8.74	15772	9962.38	19872.9	2599.54	2351.48	32.73	1064.58	9	-0.3	533.295	106.56	3843600	6146500	4	F4:30060	MSB66431A.raw	O43187|IRAK2_HUMAN
YVTFLGALAL	115.96	16341.8	3216.14	13702.9	5320.06	11405.5	49.04	1066.61	10	0.5	534.311	114.75	170670000	95197000	4	F4:33185	MSB66431A.raw	P06703|S10A6_HUMAN
SYIEHIFEI	82.86	7.05	21264.6	9747.11	4995.92	31.28	45.79	1149.57	9	0.1	575.793	105.88	6531500	19311000	3	F3:29679	MSB66430A.raw	Q15121|PEA15_HUMAN
AYLHTTTTF	14102.3	13.57	19179.2	30003	11395.9	305.21	38.42	1053.51	9	0.2	527.764	53.08	4579100	2019900	3	F3:14459	MSB66430A.raw	O15438|MRP3_HUMAN
AYSRVQYQF	18877.5	10.39	28227.1	29235.5	26801.2	380.81	21.11	1160.56	9	0.1	581.288	54.33		289120	4	F4:14754	MSB66431A.raw	O75815|BCAR3_HUMAN
EYYDKHFTEF	21871.3	38.97	25446.5	28734.7	19021	361.54	42.29	1377.59	10	-1.2	689.8	61.36	0	1013100	4	F4:16864	MSB66431A.raw	P38606|VATA_HUMAN
FYPAIADLF	7310.93	11.89	26920.3	23362.3	4045.67	90.15	39.59	1055.53	9	-0.8	528.773	113.08	3421800	1650400	1	F1:33765	MSB66428A.raw	Q92791|SC65_HUMAN
FYQPKIQQF	16338.2	12.63	25143	26794.2	7068.17	18.18	36.29	1197.62	9	-1.1	599.816	72.51		1041500	4	F4:19918	MSB66431A.raw	Q9NVI1|FANCI_HUMAN
FYSNIQTVI	7203.43	73.07	19185.8	10133.8	6282.74	104.67	38.96	1083.56	9	-0.6	542.787	93.69	862820	5509500	4	F4:25680	MSB66431A.raw	P24928|RPB1_HUMAN
IYAPPLPSL	3446.55	69.68	9956.77	21932.5	865.05	70.67	27.53	969.553	9	-0.5	485.784	104.96	1727600	8624300	3	F3:29346	MSB66430A.raw	Q92667|AKAP1_HUMAN
IYFEYSHAF	3601.44	6.41	16726.9	14924.9	3875.61	14.35	37.41	1175.53	9	0.2	588.772	88.85		701260	1	F1:24728	MSB66428A.raw	P20585|MSH3_HUMAN
IYKPVTDFF	21725.1	9.07	28294.4	25448.1	16881.8	84.39	40.82	1128.59	9	-0.1	565.3	92.66		1641600	4	F4:25302	MSB66431A.raw	P42704|LPPRC_HUMAN
IYKSIMEQF	27045.6	15.23	34086.7	30938.2	27590.6	195.52	40.33	1157.58	9	-1	579.796	80.68		964620	4	F4:22172	MSB66431A.raw	Q6UXY1|BI2L2_HUMAN
IYKWITDNF	27214.7	11.83	30842	28326.6	23655.8	374.29	45.4	1198.6	9	-2.4	600.307	97.21	2578800	850750	4	F4:26635	MSB66431A.raw	Q92949|FOXJ1_HUMAN
IYNGKLFDL	13052.9	161.86	28609.3	31846.1	13875.7	237.71	37.83	1081.58	9	-1.5	541.797	92.12		638260	4	F4:25202	MSB66431A.raw	Q99661|KIF2C_HUMAN
KFIDNTLYF	2988.59	22.71	21115.1	24072.5	6711.76	120.81	44.88	1159.59	9	-0.3	580.803	93.13	1522600	924220	4	F4:25489	MSB66431A.raw	Q14116|IL18_HUMAN
KYDEIFYNL	674.33	52.51	25126.6	21779	8261.99	422.8	41.9	1203.58	9	-0.6	602.798	94.69		430840	4	F4:25883	MSB66431A.raw	Q9NZN4|EHD2_HUMAN
KYNDNFFGL	2041.21	54.91	25749.7	27453.4	7974.7	155.74	42.7	1116.52	9	-0.6	559.269	95.52	1570700	6565300	4	F4:26083	MSB66431A.raw	Q8N806|UBR7_HUMAN
KYPDIISRI	7519.19	24.28	29888	25303.4	2343.38	425.29	27.28	1103.63	9	-0.1	552.824	67.86		786040	4	F4:18953	MSB66431A.raw	P18858|DNLI1_HUMAN
KYPENFFLL	1252.17	5.26	23531	21942.4	571.17	58.33	18.47	1169.61	9	-0.8	585.813	107.94		10005000	4	F4:30680	MSB66431A.raw	P62136|PP1A_HUMAN:P36873|PP1G_HUMAN:P62140|PP1B_HUMAN
LYGRNFNYL	13843.3	33.05	23633.3	28830.6	6675.26	370.5	16.26	1158.58	9	-3	580.297	74.97		238050	4	F4:20617	MSB66431A.raw	Q5XG87|PAPD7_HUMAN
LYKELGEYF	22904.5	43.76	30785.3	30807.3	23050.9	195.64	40.64	1160.58	9	-1.5	581.294	88.7	641900	795890	4	F4:24318	MSB66431A.raw	O60610|DIAP1_HUMAN
LYQEVFGRL	12966.7	79.22	24173.8	23023.5	10365.4	478.38	29.04	1123.6	9	0.3	562.809	86.97	74854	140850	4	F4:23852	MSB66431A.raw	Q14494|NF2L1_HUMAN
LYRLKFNEF	31665.7	147.11	19109.8	34300.9	15847.6	346.58	44.25	1228.66	9	-0.3	410.561	83.7	156210	282760	1	F1:23261	MSB66428A.raw	P56559|ARL4C_HUMAN
LYSEVDVHF	9654.64	30.77	29706.5	22463.5	20450.2	382.43	38.22	1107.52	9	0.1	554.769	79.4	0	2059900	4	F4:21888	MSB66431A.raw	Q7Z3K3|POGZ_HUMAN
LYTEKFEEF	21483.2	20.12	33263.6	30675.6	13862.9	203.67	47.75	1204.57	9	-1	603.289	76.26		3528000	4	F4:21007	MSB66431A.raw	P40222|TXLNA_HUMAN
NYIKDLNIL	13667.2	152.07	27091.3	30753.3	18797.6	477.93	39.98	1104.62	9	-1.1	553.316	92.79	3225300	5182600	3	F3:25528	MSB66430A.raw	Q05D32|CTSL2_HUMAN
NYKKFYEQF	34189.3	27.28	35783.9	34367	29112.4	301.66	48.76	1265.61	9	-1.8	633.81	59.09	3415400	13082000	2	F2:16193	MSB66429A.raw	P07900|HS90A_HUMAN
NYLDQIAKF	21062	33.17	34447.8	29666	26345.8	232.36	30.25	1110.57	9	0.4	556.293	96.48		825900	4	F4:26461	MSB66431A.raw	P41229|KDM5C_HUMAN:Q9BY66|KDM5D_HUMAN
NYLSIFRKF	24419.9	13.26	31769	27841.6	27846.1	189.96	45.67	1186.65	9	-0.5	396.557	95.24	1225900	3055900	1	F1:26722	MSB66428A.raw	P07384|CAN1_HUMAN
QYAPLLAVF	14401.4	12.68	20623.8	26025.9	15750	173.39	39.13	1020.56	9	0.2	511.29	112.34	2938600	1096600	4	F4:32277	MSB66431A.raw	Q9Y6E2|BZW2_HUMAN
RWFDKSFTF	2447.93	5.43	19049.1	15444.7	10678.9	212.72	51.9	1232.6	9	0.2	411.873	91.2	4970000	8925500	4	F4:24965	MSB66431A.raw	P50416|CPT1A_HUMAN
RYKLYQEMF	30355.6	26.19	29802.7	34147.9	25675.2	496.63	41.94	1276.63	9	0.5	426.55	70.22		120480	4	F4:19355	MSB66431A.raw	Q14204|DYHC1_HUMAN
RYPDRITLI	9020.51	15.51	21578.2	25370.3	827.99	151.71	21.12	1145.66	9	-3.3	573.833	65.19		627510	2	F2:17972	MSB66429A.raw	P60510|PP4C_HUMAN
SFITSSWTF	4634.42	11.43	21889.3	21841.3	12924.1	304.9	33.38	1074.5	9	0.5	538.259	110.27	0	1100000	4	F4:31519	MSB66431A.raw	Q9BXS4|TMM59_HUMAN
SYATLLHVL	5457.42	39.89	12966.9	25379.9	4489.71	64.21	43.6	1015.57	9	0.7	508.793	99.31	792580	630620	1	F1:28159	MSB66428A.raw	O43194|GPR39_HUMAN
SYIPIFPQL	1442.3	20.98	20166.8	18370.4	3053.93	59.75	32.12	1076.59	9	1.6	539.303	111.68	960990	2479000	3	F3:31945	MSB66430A.raw	Q6Y1H2|HACD2_HUMAN
SYIPLFPQL	1806.89	24.29	19803.8	19003.2	3661.24	73.54	32.12	1076.59	9	1.6	539.303	111.68	960990	2479000	3	F3:31945	MSB66430A.raw	B0YJ81|HACD1_HUMAN
SYMGHFDLL	2139.49	11.02	13464	18686.3	3695.83	77.25	45.3	1081.49	9	-0.1	541.752	97.37		8365800	4	F4:26663	MSB66431A.raw	Q9BWJ5|SF3B5_HUMAN
SYQKVIELF	15331.6	4.4	29762.1	26857.5	23370.9	233.77	42.96	1125.61	9	-1	563.81	94.18	21030000	5217900	3	F3:25981	MSB66430A.raw	Q96KB5|TOPK_HUMAN
TYLKAVKLF	25131.8	11.13	32961.9	30940.6	25274.7	413.46	38.08	1081.65	9	-1	541.833	76.23		25075	4	F4:20988	MSB66431A.raw	P48200|IREB2_HUMAN
TYLPTSPLL	5631.8	39.71	20014.7	18475.6	3974	146.63	32.13	1003.56	9	0.8	502.787	103.59	419550	2367900	4	F4:28817	MSB66431A.raw	O43847|NRDC_HUMAN
TYMKDLYQL	2561.01	10.06	19375.4	22294.5	12639	238.54	44.71	1173.57	9	-1.8	587.793	81.56	3450200	13881000	4	F4:22428	MSB66431A.raw	Q8N392|RHG18_HUMAN
TYPDVNNSI	12586.9	165.3	25116	25408.5	1512.92	445.4	36.07	1021.47	9	0.2	511.743	59.58	7442.2	400150	1	F1:16357	MSB66428A.raw	O75436|VP26A_HUMAN
TYQRWQFTL	6177.19	6.49	17436.7	14507.5	10727.2	141.31	45.38	1241.62	9	-1.8	621.816	96.26		1642400	2	F2:26495	MSB66429A.raw	Q6P2Q9|PRP8_HUMAN
VFYPYPQYF	7292.76	12.59	23426.6	16525.4	3005.78	32.6	35.81	1222.57	9	-0.4	612.292	108.01	1386600	3163700	2	F2:30621	MSB66429A.raw	Q3SXM5|HSDL1_HUMAN
VYDGKFAIF	17275	41.37	22094.4	32589.9	8168.4	146.62	36.68	1058.54	9	0	530.279	91.13	480370	163960	3	F3:25118	MSB66430A.raw	P21860|ERBB3_HUMAN
VYFPDQHINF	22459.1	17.66	31877.1	26016.6	10647.6	394.96	40.62	1278.6	10	-0.5	640.309	88.7		2403000	4	F4:24316	MSB66431A.raw	Q8TEW8|PAR3L_HUMAN
VYISEHEHF	22984.9	10.33	33149.3	29822.7	18468.8	254.59	37.58	1159.53	9	-1.6	580.771	49.47		770800	1	F1:13376	MSB66428A.raw	O96005|CLPT1_HUMAN
VYISSLALL	3382.97	14.8	21386.9	22853.7	3299.25	125.69	26.93	977.58	9	0.2	489.797	110.02		2356100	4	F4:31405	MSB66431A.raw	O00487|PSDE_HUMAN
VYKTIMEQF	30218	23.03	35723.9	33250.6	29626.5	326.88	42.44	1157.58	9	-0.4	579.797	77.93		2271600	4	F4:21389	MSB66431A.raw	Q9UQB8|BAIP2_HUMAN
VYLDKFIRL	6680.31	42.89	31406.4	26155.2	8427.3	197.5	39.89	1165.69	9	-0.2	583.85	92.61		1612700	4	F4:25313	MSB66431A.raw	Q9NVN8|GNL3L_HUMAN
VYPGDPLRF	30421.1	47.45	35005.3	35882.7	11022.2	400.6	20.22	1062.55	9	-0.6	532.282	81.24		2124500	4	F4:22271	MSB66431A.raw	Q9BSV6|SEN34_HUMAN
VYSEVAAYEF	14088.2	9.14	26605.6	26986.6	19444.1	496.25	45.32	1176.53	10	-0.4	589.274	90.16	0	1824400	4	F4:24700	MSB66431A.raw	Q9Y295|DRG1_HUMAN
VYVVGTAHF	19096.3	13.6	25764.5	29897.3	13135.7	230.8	40.73	991.513	9	-0.5	496.763	64.32	12990000	16856000	3	F3:17698	MSB66430A.raw	Q9H4I3|TRABD_HUMAN
YYEKLHTYF	13924.9	29.1	21348.5	29100.1	12665.3	61.55	45.87	1262.6	9	-0.1	632.306	68.56	2561500	4586900	1	F1:18948	MSB66428A.raw	P16144|ITB4_HUMAN
YYFEGIKQTF	6772.75	7.74	22362.1	21113.8	12884.8	49.82	53.93	1294.62	10	-0.9	648.318	87.88	0	2221000	4	F4:24062	MSB66431A.raw	O95433|AHSA1_HUMAN
YYIFIPSKF	12308.6	6.55	25476.2	21595.7	15468.8	54.7	42.05	1176.62	9	-0.7	589.318	105.64	21639000	33806000	3	F3:29609	MSB66430A.raw	Q9H0S4|DDX47_HUMAN
YYQNYFEKL	6832.14	12.64	25752.2	22369.3	4157.31	34.64	51.32	1266.59	9	-1.2	634.303	83.4		1764800	4	F4:22887	MSB66431A.raw	Q86TB9|PATL1_HUMAN
AYSIVAGVF	25054.4	86.82	24860	32174.1	25083.2	1035.81	20.63	925.491	9	0.6	463.753	106.1		2800600	4	F4:29892	MSB66431A.raw	P13498|CY24A_HUMAN
AYVHMVTHF	14608.1	24.67	30444.8	34270.4	24474.1	740.07	45.22	1103.52	9	0.6	368.848	55.53	20600000	22999000	4	F4:15168	MSB66431A.raw	P55061|BI1_HUMAN
DYTIGFGKF	38671.2	487.26	37658	36293.5	36746.7	7053.42	45.85	1046.51	9	-1	524.26	94.48	0	923680	3	F3:26045	MSB66430A.raw	P16144|ITB4_HUMAN
DYVEGLRVF	27366.8	493.12	30979.1	34987.9	28982.6	828.1	45.66	1096.56	9	-1.6	549.284	92.76	1383900	8766700	4	F4:25369	MSB66431A.raw	P60660|MYL6_HUMAN
EYFESPFTI	6318.26	37.07	32135.1	7574.47	19210.3	890.54	32.59	1131.51	9	-1.9	566.763	109.47	1501100	1539500	4	F4:31201	MSB66431A.raw	P00414|COX3_HUMAN
EYIPKWEQF	27905.2	26.26	34740.1	30942.2	31523.1	1490.63	37.32	1238.6	9	-1.9	620.305	87.63	742220	3336400	3	F3:24185	MSB66430A.raw	Q9HBI5|CC014_HUMAN
EYLKVDAQF	25787.4	90.69	33893.9	30216.7	37377.9	4323.43	47.23	1111.55	9	-0.5	556.784	72.87	4822900	3844100	3	F3:20182	MSB66430A.raw	P54577|SYYC_HUMAN
EYLPIGGLAEF	2752.34	250.52	6697.32	20136.1	12644.5	7205.62	52.63	1207.61	11	0	604.813	110.88		2844200	4	F4:31720	MSB66431A.raw	P00505|AATM_HUMAN
EYPDRIMNTF	23763.8	106.24	4959.84	13287.5	17466.2	1958.97	49.9	1284.58	10	-0.8	643.297	77.83		4993400	4	F4:21407	MSB66431A.raw	P07437|TBB5_HUMAN:P68371|TBB4B_HUMAN:Q13885|TBB2A_HUMAN:Q9BVA1|TBB2B_HUMAN:Q13509|TBB3_HUMAN
EYQKVWNLF	29642.2	10.17	33108.8	31678	34468.6	3089.66	42.14	1225.61	9	-0.1	613.814	103.71	5934500	4327800	3	F3:28780	MSB66430A.raw	Q9H0J9|PAR12_HUMAN
GYPLWKVTF	26436.9	51.01	32788.3	37104.3	14198.7	869.73	45.2	1109.59	9	-1.2	555.802	105.25	2804900	3611800	3	F3:29445	MSB66430A.raw	P00491|PNPH_HUMAN
IFIDPGYQTF	5268.96	24.28	19892.9	25940.5	9566.98	771.16	40.69	1199.59	10	0.1	600.8	105.25	2642900	1811500	3	F3:29446	MSB66430A.raw	Q9UBW7|ZMYM2_HUMAN
IFTDLSSRF	16884.4	133.94	25487.5	25461.9	14737.6	584.95	39.49	1084.56	9	0.1	543.285	83.77		2695800	2	F2:23203	MSB66429A.raw	P13010|XRCC5_HUMAN
IYGSVWEKL	19873.5	20.13	31085.5	28659.5	19406.9	1687.64	33.08	1093.58	9	0.4	547.798	86.31	354410	913930	4	F4:23621	MSB66431A.raw	Q96LT4|SAMD8_HUMAN
IYGYVAEQF	24200	7.28	34855.3	28972.2	25395.6	730.55	43.2	1088.52	9	0.1	545.266	88.09	3564500	12086000	3	F3:24333	MSB66430A.raw	Q9Y6A9|SPCS1_HUMAN
IYLPYLHEW	14438.9	9.69	32614.3	18204.6	21556.5	1144.69	31.84	1232.62	9	-1.4	617.318	107.22	1336100	2704700	4	F4:30391	MSB66431A.raw	Q99816|TS101_HUMAN
IYLPYLQNW	22397	16.45	36880.9	22037.6	25956.5	2545.18	38.93	1208.62	9	-0.2	605.319	111.92	1476500	1432800	3	F3:32036	MSB66430A.raw	Q8IX04|UEVLD_HUMAN
IYQRDPLKL	28722.2	80.15	30538.8	32008.1	16422.6	849.46	37.02	1144.66	9	-0.9	382.56	59.27	564320	333330	1	F1:16171	MSB66428A.raw	P42226|STAT6_HUMAN
KFIDTTSKF	11079.9	70.39	19908.2	29956	11991.3	586.31	40.2	1085.58	9	-1.1	543.794	44.55	130690	1068300	2	F2:12035	MSB66429A.raw	P39023|RL3_HUMAN:Q92901|RL3L_HUMAN
KWNPTAGVAF	22593.9	187.4	19304.7	36428.1	11103.6	6819.88	43.7	1089.56	10	0	545.788	77.15	271520	3473400	4	F4:21271	MSB66431A.raw	P19387|RPB3_HUMAN
KYAWVLDKL	8129.69	34.81	26026.2	28391.3	16618.3	1609.34	43.57	1134.64	9	-1.5	568.328	85.64		1868500	4	F4:23510	MSB66431A.raw	P68104|EF1A1_HUMAN:Q5VTE0|EF1A3_HUMAN:Q05639|EF1A2_HUMAN
KYITDWQNVF	14161.8	11.41	24850	29607.3	25431.9	743.78	48.72	1312.65	10	-2	657.329	100.58	0	3501400	3	F3:27772	MSB66430A.raw	O75340|PDCD6_HUMAN
KYITQGQLLQF	19834.6	52.91	33521.2	34868.1	34117.3	4724.64	38.98	1337.73	11	0.8	669.875	90.79		2124000	4	F4:24875	MSB66431A.raw	Q9NYP7|ELOV5_HUMAN
KYLSVQGQLF	15940.1	7.82	26799.8	28562	26531.1	2025.79	48.62	1181.64	10	0.2	591.83	81.85	5537800	33276000	4	F4:22559	MSB66431A.raw	Q9NZJ7|MTCH1_HUMAN
KYTKIFNDF	24558.2	11.36	31732.2	34052	24223	995.39	45.99	1174.6	9	0.1	588.308	64.39	0	1479000	4	F4:17752	MSB66431A.raw	Q15326|ZMY11_HUMAN
LFAVFQTTF	15808	76.51	25808.9	22133.2	15308.1	1814.41	39.53	1072.56	9	-1.3	537.286	111.18	2675300	880210	3	F3:31760	MSB66430A.raw	Q99650|OSMR_HUMAN
LYADVGGKQF	24867.3	241.58	21800.7	32044.1	22658.5	1446.62	46.19	1096.56	10	0.9	549.285	62.18	279100	254160	1	F1:17092	MSB66428A.raw	P51571|SSRD_HUMAN
LYGKIAEAF	25412.3	16.11	27886.3	30395.1	25220.9	974.79	37.43	1010.54	9	-0.2	506.279	76.41	702170	1952800	1	F1:21184	MSB66428A.raw	O14908|GIPC1_HUMAN
LYIGWDKHYGF	14258	56.09	34732.9	28790.7	35881.2	3706.92	50.15	1397.68	11	-1.7	699.845	91.63	3922400	1696000	3	F3:25316	MSB66430A.raw	P25789|PSA4_HUMAN
LYLKVKGNVF	26992.7	74.02	19702.7	30368.1	26849.4	3662.87	25.37	1179.7	10	0.7	590.859	68.81		214700	4	F4:18941	MSB66431A.raw	P84098|RL19_HUMAN
NYIGLINRI	8279.09	41.7	31970.3	18221.1	25252.8	959.54	42.95	1074.62	9	-1.3	538.316	89.85		1062700	4	F4:24619	MSB66431A.raw	P19525|E2AK2_HUMAN
NYTLVSHLI	12403.3	16.01	27427.8	12715.5	19384.6	1239.19	48.08	1058.58	9	0	530.295	90.16	806990	1283100	4	F4:24735	MSB66431A.raw	P56192|SYMC_HUMAN
PQPDVFPLF	5923.23	257.35	38745	32382.2	15690.3	7505.61	30.54	1058.54	9	-0.8	530.279	111.43	0	6476100	4	F4:31918	MSB66431A.raw	Q9NY61|AATF_HUMAN
PYNPIIGETF	34971.3	58.33	36607.4	36436.7	28370.8	8854.48	34.26	1149.57	10	-0.7	575.792	105.54	1700500	4284500	3	F3:29544	MSB66430A.raw	Q9BXB4|OSB11_HUMAN:Q9BXB5|OSB10_HUMAN
PYNPILGETF	35543.5	56.61	36426.1	36632.8	29884.4	9599.74	34.26	1149.57	10	-0.7	575.792	105.54	1700500	4284500	3	F3:29544	MSB66430A.raw	Q9H0X9|OSBL5_HUMAN:Q9BZF1|OSBL8_HUMAN
PYTPFLTEL	24356.5	321.12	33605.8	34071.9	17569.8	1633.96	25.39	1079.55	9	-1.4	540.783	109.42	1223100	1165500	4	F4:31203	MSB66431A.raw	P41252|SYIC_HUMAN
QYPVIIHLI	8943.73	11.23	33361.6	21905.2	7474.33	1374.97	32.37	1094.65	9	0	548.332	105.45	0	5274500	4	F4:29558	MSB66431A.raw	Q9BW60|ELOV1_HUMAN
RFVNVVPTF	5565.53	17.9	16239.2	23396.9	14001.5	502	39.73	1077.6	9	0.2	539.806	89.14		2030000	4	F4:24409	MSB66431A.raw	P62861|RS30_HUMAN
RLPEEWSQW	8758.62	193.07	26906.4	30125.3	8104.84	13985.6	43.06	1229.58	9	-1.4	615.798	88.41		1185000	4	F4:24189	MSB66431A.raw	P04792|HSPB1_HUMAN
RWSPVRPLVF	19334	16.47	13850.5	28669.8	4766.28	2270.82	42.43	1255.72	10	-0.2	628.867	89.29		6315500	4	F4:24441	MSB66431A.raw	Q96EX3|DC2I2_HUMAN
RYFDPANGKF	16423.8	52.65	18610.6	28121.1	18092.2	930.03	38.92	1213.59	10	-0.6	405.536	52.82		2116900	4	F4:14312	MSB66431A.raw	P13639|EF2_HUMAN
RYISPDQLADL	9014.17	460.48	23249.5	34957.3	5662.42	5345.1	30.93	1289.66	11	-2.7	645.836	82.63		556270	4	F4:22664	MSB66431A.raw	P06733|ENOA_HUMAN
TGPTRFFLF	12130.6	97.34	24383.7	18191	1591.81	1832.92	17.01	1084.57	9	0.8	543.293	106.98		2755200	4	F4:30246	MSB66431A.raw	Q8NFJ5|RAI3_HUMAN
TYGEIFEKF	22331.6	6.46	36532.2	28727.5	26287.4	653.74	48.95	1132.54	9	-0.8	567.279	90.51	0	19012000	3	F3:24967	MSB66430A.raw	O95298|NDUC2_HUMAN
TYPNTYIF	25813.6	95.27	30532.2	27862.4	14470.3	828.49	29.98	1017.48	8	0	509.748	94.18	262810	3477600	4	F4:25739	MSB66431A.raw	Q8TEL6|TP4AP_HUMAN
TYQDIQNTI	16256.6	30.22	25991	16253	12611.7	702.67	35.91	1094.52	9	-0.7	548.269	65.7	0	1503000	1	F1:18149	MSB66428A.raw	P24928|RPB1_HUMAN
TYSPALNKMF	27707.3	46.3	29943	33652.4	12434.6	1422.45	38.53	1170.57	10	-0.9	586.294	78.85		255910	4	F4:21702	MSB66431A.raw	P04637|P53_HUMAN
VLPSVLNKF	2467.34	105.72	28448.2	28645.6	1335.97	3207.48	28.42	1015.61	9	-1	508.81	88.91		439200	1	F1:24720	MSB66428A.raw	Q9BTE3|MCMBP_HUMAN
VYEEILHQI	7707.57	47.81	31944.4	19349.8	16213.9	1457.17	40.55	1142.6	9	-5.9	572.303	81.29		728590	2	F2:22531	MSB66429A.raw	Q9BZQ8|NIBA1_HUMAN
VYLPPEAFTF	4945.15	6.67	27212	23655.3	3659.18	839.21	30.72	1182.6	10	1.2	592.306	110.02	1775300	3669200	4	F4:31419	MSB66431A.raw	P26358|DNMT1_HUMAN
VYSHLPDLL	18145.6	66.73	29506.9	24119.7	13355	758.2	14.89	1055.57	9	2.1	528.791	89.24		686760	4	F4:24429	MSB66431A.raw	O75509|TNR21_HUMAN
VYSIVPQSW	32568.4	36.41	32735.9	25480.9	26141.3	2847.09	34.27	1077.55	9	-0.9	539.782	103.61	0	2536900	4	F4:28866	MSB66431A.raw	Q71RC2|LARP4_HUMAN
YYLNDLERI	2661.04	22.12	33311.1	17070.8	19896.1	1323.4	37.18	1197.6	9	0.7	599.809	89.33		956050	4	F4:24455	MSB66431A.raw	P04899|GNAI2_HUMAN:P19086|GNAZ_HUMAN
RPYGVGLLI	7161.16	8597.32	35.86	220.95	13876.9	13207.7	26.17	986.591	9	-0.8	494.303	92.47	0	1038500	1	F1:25789	MSB66428A.raw	P25786|PSA1_HUMAN
LTVPFEKHSTL	4298.75	21934.6	317.83	7470.94	3760.61	16824.5	47.12	1270.69	11	-1.5	636.352	69.13	180600	1214900	1	F1:19131	MSB66428A.raw	O95336|6PGL_HUMAN
MIPYQIGDVF	7148.77	3867.19	370.88	1714.2	5126.91	10677.7	42.6	1181.58	10	-1	591.796	109.45	21770000	6883600	3	F3:31049	MSB66430A.raw	Q9NQP4|PFD4_HUMAN
FPQFYPLGI	5744.05	17953.4	315.65	163.53	16880.2	12012.7	22.54	1080.56	9	-1.8	541.288	112.05		3374500	4	F4:32196	MSB66431A.raw	P35244|RFA3_HUMAN
MPWFKGWKV	2981.48	15841.6	367	101.07	23141.9	15159.1	45.93	1177.61	9	0.4	393.544	96.22		8608600	4	F4:26275	MSB66431A.raw	P68104|EF1A1_HUMAN:Q5VTE0|EF1A3_HUMAN:Q05639|EF1A2_HUMAN
VPYIGIVTI	12283.1	19867.7	446.18	375.16	15339.5	20275.1	21.04	973.585	9	-0.5	487.799	108.98	3703800	2258200	4	F4:30998	MSB66431A.raw	P67812|SC11A_HUMAN
HPSLIPLFV	6992.78	26317.8	615.55	203.07	29487.7	13382.2	32.84	1021.6	9	0	511.805	107.84	2733500	6833800	4	F4:30607	MSB66431A.raw	O00483|NDUA4_HUMAN
SIPDVNVNL	182.84	15237.9	16230	30351.4	65.46	3109.62	31.53	969.513	9	-0.9	485.763	87.64		1717400	4	F4:24056	MSB66431A.raw	Q09666|AHNK_HUMAN
YVPPELITL	27.38	3878.59	13445.3	20622.7	18.65	687.65	23.05	1043.59	9	-0.7	522.802	107.65	3221000	3815000	3	F3:30431	MSB66430A.raw	P49770|EI2BB_HUMAN
FSPLHALNF	7725.69	854.04	21274	22012.6	160.25	567.08	46	1044.54	9	-0.7	523.277	98.92	13312000	3110300	3	F3:27319	MSB66430A.raw	P68402|PA1B2_HUMAN:Q15102|PA1B3_HUMAN
RVAPEEHPVL	2273.75	15916.3	2256.3	25821.2	315.4	11411.7	42.24	1145.62	10	0.2	573.817	40.27	252580	15381	1	F1:10818	MSB66428A.raw	P60709|ACTB_HUMAN:P63261|ACTG_HUMAN:A5A3E0|POTEF_HUMAN
IYDKFIAQL	4492.53	251.78	20227.6	24401.1	4567.02	177.82	39.51	1109.61	9	0.5	555.814	90.78	778210	624030	3	F3:25016	MSB66430A.raw	Q6P1K2|PMF1_HUMAN
TYTDRVFFL	4772.16	63.49	26384.6	24681.8	6691.31	42.72	36.36	1160.59	9	-3	581.299	100.26	0	1835900	1	F1:28511	MSB66428A.raw	O15031|PLXB2_HUMAN
VYIKHPVSL	10657.5	45.15	10945.2	26024	1746.53	30.49	45.27	1054.62	9	1.1	528.317	52.93		258240	1	F1:14372	MSB66428A.raw	P48556|PSMD8_HUMAN
YYDKHFTEF	3891.41	22.7	8827.03	22660.5	2986.04	20.6	38.48	1248.55	9	-0.1	625.28	53.63	1573700	3670600	4	F4:14606	MSB66431A.raw	P38606|VATA_HUMAN
YYTDIMHTL	569.05	22.75	13923.4	16397.7	1816.87	12.3	46.04	1155.53	9	0.1	578.771	86.2	247450	6158200	4	F4:23600	MSB66431A.raw	O15031|PLXB2_HUMAN
IRDNFVIVY	26105.2	29463.2	37641.3	34342.1	38246.4	194.77	37.65	1137.62	9	-0.2	569.816	85.87	7668500	5851800	3	F3:23762	MSB66430A.raw	Q9Y6Q5|AP1M2_HUMAN
MRYVASYLL	1959.03	2919.17	14825.5	7486.47	13606.5	43.35	41.13	1114.58	9	0.5	558.3	91.86	448040000	160130000	2	F2:25396	MSB66429A.raw	P05387|RLA2_HUMAN
YRFLPQKIIYL	771.36	9225.62	27696.2	28223.8	1484.09	411.29	54.78	1452.85	11	-0.5	727.432	101.46	66337000	9998200	3	F3:27959	MSB66430A.raw	Q9UL46|PSME2_HUMAN
YRPPELLL	24728	14695.3	25717.4	31338.5	13585.1	364.28	29.82	999.575	8	2.4	500.796	87.28	765660	1517600	4	F4:23840	MSB66431A.raw	Q9NYV4|CDK12_HUMAN:Q14004|CDK13_HUMAN:P50750|CDK9_HUMAN
YQLDPKFITSIL	75.48	17046.6	204.89	12915.9	17528	12037	28.76	1436.79	12	0.1	719.403	109.94		1751800	2	F2:33937	MSB60102A.raw	P16422|EPCAM_HUMAN
LLPEHFLFL	8.72	586.18	14437.5	14558.5	20.66	223.86	27.1	1127.64	9	0.1	564.826	110.12	3599900	5373800	2	F2:33984	MSB60102A.raw	P42226|STAT6_HUMAN
FLYPFPLAL	5.38	4961.66	3279.49	3307.65	160.43	41.72	31.64	1079.61	9	-0.5	540.81	116.4	5273000	13397000	1	F1:36916	MSB60101A.raw	Q5BJD5|TM41B_HUMAN
FAIPGSIFL	11.35	14842.8	7041.68	4061.9	268.25	428.72	19.18	963.543	9	0.7	482.779	113.03		2980100	2	F2:35147	MSB60102A.raw	Q5BJD5|TM41B_HUMAN
RLPETLPSL	8.59	1233.24	3819.62	22913.4	13.84	660.35	26.09	1024.59	9	-0.7	513.303	76.61	6115700	11399000	2	F2:22347	MSB60102A.raw	P37088|SCNNA_HUMAN
FVPEIFHRI	5.25	901.59	22271.8	7608.31	215.06	1112.55	24.93	1156.64	9	-2.5	386.553	77.18		1239300	2	F2:22418	MSB60102A.raw	Q13472|TOP3A_HUMAN
TLPDLVPQL	28.06	6557.71	23906.1	25554.9	64.76	865.08	22.45	994.57	9	-0.5	498.292	107.16	1322900	4291400	2	F2:32713	MSB60102A.raw	Q15061|WDR43_HUMAN
ALPEIFTEL	10.81	4098.23	14584.9	29114.3	24.83	833.98	32.63	1031.55	9	-0.9	516.784	111.31	1362900	11124000	2	F2:34489	MSB60102A.raw	Q2VIR3|IF2GL_HUMAN:P41091|IF2G_HUMAN
ILPERFLAV	6.01	3391.95	14479.5	14127.8	35.69	609.77	22.64	1056.63	9	1	529.324	86.93		619580	2	F2:25513	MSB60102A.raw	Q8NBQ5|DHB11_HUMAN
SVPIEIPTI	235.23	3164.09	24694.6	16681.2	332.22	8861.86	25.25	967.559	9	0.4	484.787	105.45		7046600	2	F2:32023	MSB60102A.raw	Q9NP92|RT30_HUMAN
FLSELTQQL	7.21	9708.48	7215.76	10589.1	507.22	288.4	20.85	1077.57	9	4.4	539.795	97.81		1504500	2	F2:29241	MSB60102A.raw	P14174|MIF_HUMAN
FTLSHITQL	7.88	8739.4	6014.94	11780.1	615.19	439.17	30.46	1058.58	9	0.1	530.295	81.81	1467200	1270800	2	F2:23897	MSB60102A.raw	Q15404|RSU1_HUMAN
SQIPFPLSL	13.94	4237.98	9817.71	13007.5	1649.46	337.45	29.16	1000.56	9	0.3	501.287	110.65		4567600	2	F2:34224	MSB60102A.raw	Q5HYI7|MTX3_HUMAN
YQYPFVLGL	3.25	3577.17	14996.8	6087.22	1667.48	146.51	25.06	1098.58	9	1	550.295	111.84		2124800	2	F2:34719	MSB60102A.raw	Q8IWX5|SGPP2_HUMAN
FLLPVINEM	6.27	10589.5	12151	10986.2	2360.2	397.16	41.07	1074.58	9	-0.1	538.296	111.84		7685900	2	F2:34697	MSB60102A.raw	Q96HT8|MR1L1_HUMAN:Q9Y605|MOFA1_HUMAN
YQYPVIIHL	4.29	3104.27	19521.9	6614.44	2985.81	201.2	34.12	1144.63	9	-0.2	573.321	94.95	4030300	22941000	2	F2:28232	MSB60102A.raw	Q9BW60|ELOV1_HUMAN
FQTEGKLYL	10.95	15606.5	16449.1	14124.7	2559.52	458.46	21.14	1097.58	9	-1.7	549.794	68.42		488240	2	F2:19773	MSB60102A.raw	Q9UK32|KS6A6_HUMAN:Q15349|KS6A2_HUMAN:Q15418|KS6A1_HUMAN:P51812|KS6A3_HUMAN
FQMPTPIQM	9.1	6765.94	7591.7	9203.88	2466.54	98.28	29.13	1091.51	9	-0.8	546.764	102.38		1847100	2	F2:30989	MSB60102A.raw	Q9Y2R4|DDX52_HUMAN
ALLNILSEV	3.88	25781.5	23000.3	19622.5	15996.2	13159.9	18.34	970.57	9	-0.2	486.292	111.79	0	1377100	2	F2:34690	MSB60102A.raw	A0AVT1|UBA6_HUMAN
SVSTQLSLV	98.44	26664.1	14996.3	16050	13355.3	16456.2	20.07	932.518	9	-0.8	467.266	76.12		401190	2	F2:22110	MSB60102A.raw	A4D0T7|SIM30_HUMAN
VTTDIQVKV	249.67	27521.5	32486.8	12675.4	16194.1	15003.8	29.8	1001.58	9	1	501.796	52.15		3972300	2	F2:14766	MSB60102A.raw	O00267|SPT5H_HUMAN
TIPEAFRGV	52.99	17235.6	23747.3	25264	626.24	9248.91	36.95	988.534	9	-0.1	495.274	63.48	2699600	4061200	2	F2:18225	MSB60102A.raw	O00299|CLIC1_HUMAN
ATLKELTSL	92.46	16954.5	7651.4	29296	7415.45	18730.8	24.46	974.565	9	-1.8	488.289	73.53	0	2514900	2	F2:21271	MSB60102A.raw	O00422|SAP18_HUMAN
RALALVVTL	91.8	5726.24	1751.45	6948.67	6103.18	5881.47	26.27	954.623	9	-0.7	478.318	87.24		4662200	2	F2:25693	MSB60102A.raw	O00622|CCN1_HUMAN
KVVDVDVKL	105.32	25121.7	18955.1	22880.7	13250.8	14390.7	25.23	1013.61	9	0.7	507.814	54.03		162120	2	F2:15393	MSB60102A.raw	O15066|KIF3B_HUMAN
SAIKYLHSL	28.56	5923.62	821.33	7855.24	824.37	1218.19	29.12	1030.58	9	1.3	516.298	57.61		241670	2	F2:16460	MSB60102A.raw	O15075|DCLK1_HUMAN
STIKEVAQA	148.65	35640.1	23391.9	25902.9	26258.4	25776.8	14.75	945.513	9	0.7	473.764	22.44	0	136530	1	F1:5907	MSB60101A.raw	O15269|SPTC1_HUMAN
TQVTALIKL	79.45	17308.9	26101.2	23585	19404.8	9675.76	18.5	985.617	9	-0.4	493.816	80.58		1132100	2	F2:23438	MSB60102A.raw	O43847|NRDC_HUMAN
ATINEVVQV	16.11	28487.6	29811.8	20413.3	14637.4	15525.3	13.3	971.529	9	-1.5	486.771	70.92	0	341630	1	F1:20638	MSB60101A.raw	O75362|ZN217_HUMAN
SLITLIEKV	13.9	23176.5	32681.4	14072.7	20999.2	14075.8	28	1014.63	9	1.2	508.324	106.63		3227200	2	F2:32550	MSB60102A.raw	O75976|CBPD_HUMAN
ILVDWLVQV	3.33	22570.7	33378.2	12377.9	14901.8	7602.3	14.06	1083.63	9	1.8	542.825	113.88		3339500	2	F2:35598	MSB60102A.raw	O95067|CCNB2_HUMAN
FLLHIQQQV	7.33	20214	26239.4	6875.6	11583.3	5005.77	18.6	1124.63	9	0.4	563.325	76.12		192790	2	F2:22092	MSB60102A.raw	O95486|SC24A_HUMAN
GLSDGEWQL	52.5	25088.6	30463.9	30647	20381.6	14237.5	26.25	1003.46	9	-2.8	502.736	92.18		220990	2	F2:27301	MSB60102A.raw	P02144|MYG_HUMAN
RQINLELYA	50.42	25548.8	27000.6	19923.9	34097	16667.1	33.49	1118.61	9	-1.4	560.311	72		1943900	2	F2:20825	MSB60102A.raw	P02794|FRIH_HUMAN:Q8N4E7|FTMT_HUMAN
ILGYTEHQV	419.36	24699.1	34125	20341	22246.5	26579.1	14	1058.54	9	8.5	530.282	33.95		393220	2	F2:9398	MSB60102A.raw	P04406|G3P_HUMAN
ILLHLESEL	244.36	22388.7	19096.3	23189.5	7479.27	14092.7	30.89	1065.61	9	0.3	533.811	87.39		1394300	2	F2:25697	MSB60102A.raw	P05783|K1C18_HUMAN
FQEYVTFL	153.82	21801.6	30236.3	23897.9	15080.4	6134.03	43.31	1045.51	8	0.2	523.763	107.56	10054000	25552000	1	F1:33489	MSB60101A.raw	P06703|S10A6_HUMAN
YVTFLGALA	259.63	32854.1	16289.1	12651.4	24546.2	22033.3	38.08	953.522	9	0.1	477.768	108.82	4998000	4748900	2	F2:33439	MSB60102A.raw	P06703|S10A6_HUMAN
FIADLVVGL	4.02	24901.5	10585	14175.5	3123.24	2343.3	14.55	945.553	9	1.3	473.785	111.31		462700	2	F2:34520	MSB60102A.raw	P06733|ENOA_HUMAN:P09104|ENOG_HUMAN:P13929|ENOB_HUMAN
VILPKFTAV	9.66	16515.2	4930.3	9734.77	2890.89	5121.64	27.76	986.616	9	1	494.316	81.83	3267100	3674300	1	F1:24160	MSB60101A.raw	P07093|GDN_HUMAN
YGIENEVFL	251.47	17108.3	21951.2	11953.7	1832.44	2727.06	27.08	1082.53	9	1.2	542.272	105.45	0	10116000	2	F2:32068	MSB60102A.raw	P07195|LDHB_HUMAN
FVEWIPNNV	58.73	27957.5	22726.7	10399.4	12631.5	11558.8	24.94	1116.56	9	5.6	559.291	101.95		1174700	2	F2:30728	MSB60102A.raw	P07437|TBB5_HUMAN:P68371|TBB4B_HUMAN:Q9BVA1|TBB2B_HUMAN:Q13885|TBB2A_HUMAN:Q13509|TBB3_HUMAN:P04350|TBB4A_HUMAN:Q9BUF5|TBB6_HUMAN:Q9H4B7|TBB1_HUMAN
FQAEIAQLMSL	12.87	20290.7	20485.7	20952.6	14011.8	8179.19	37.01	1249.64	11	-0.5	625.826	111.69		1727500	2	F2:34638	MSB60102A.raw	P07900|HS90A_HUMAN:P08238|HS90B_HUMAN:Q14568|HS902_HUMAN:Q58FF8|H90B2_HUMAN
NQFPGFKEV	15.12	19829.3	24756.4	8566.31	12491.9	2397.05	38.93	1064.53	9	-1.5	533.271	65.27		3230500	2	F2:18830	MSB60102A.raw	P08579|RU2B_HUMAN:P09012|SNRPA_HUMAN
LTIDDGIFEV	6.69	28144.8	30570.5	15296.5	22415.1	22730.4	21.1	1120.57	10	0.1	561.29	109.53		298780	2	F2:33760	MSB60102A.raw	P0DMV8|HS71A_HUMAN:P0DMV9|HS71B_HUMAN:P34931|HS71L_HUMAN
TVTNAVVTV	102.85	26801.2	19147.6	13496.5	10960.6	11935.4	20.14	902.507	9	-0.6	452.261	53.54	219760	270890	1	F1:15271	MSB60101A.raw	P11142|HSP7C_HUMAN
TVIPEIEGI	45.41	21648.3	28646.2	13579	18780.6	21239.5	13.93	969.538	9	8.9	485.781	101.23		246480	2	F2:30491	MSB60102A.raw	P13611|CSPG2_HUMAN
ILIDWLVQV	2.56	17066.2	32398	9509.08	11241.1	4816.62	23.41	1097.65	9	1.6	549.832	115.55		7305000	2	F2:36232	MSB60102A.raw	P14635|CCNB1_HUMAN
TLVDEVFRI	19.91	13320.2	34973.9	12400.3	18599.4	11245	32.17	1090.6	9	0.6	546.309	105.88		3119000	2	F2:32218	MSB60102A.raw	P15927|RFA2_HUMAN
QIFNGTFVKL	297.45	7798.84	14689.9	18442.3	19308	12284.1	34.36	1165.65	10	0.3	583.832	91.29		10528000	2	F2:26895	MSB60102A.raw	P18124|RL7_HUMAN
DLIHEIYTV	135.32	20912.8	33149	12087.4	29254.5	19227.8	34.22	1101.57	9	-0.4	551.792	103.46	0	15237000	2	F2:31174	MSB60102A.raw	P18124|RL7_HUMAN
GVVDIFQTV	5.26	24505.9	21923.9	14001.8	16736.7	11560.4	30.44	976.523	9	-0.8	489.268	106.55		4586300	2	F2:32455	MSB60102A.raw	P23468|PTPRD_HUMAN:Q13332|PTPRS_HUMAN
YIEQTLVTV	36.9	25753.9	17638	14592.1	9163.34	13004.6	29.01	1064.58	9	-0.4	533.295	82.38	0	1353600	1	F1:24307	MSB60101A.raw	P25490|TYY1_HUMAN
TVLEQVLPI	21.4	14287.5	11620.1	7249.02	10301	10903.9	30.51	1010.6	9	0.9	506.308	107.37	4450300	15740000	2	F2:32841	MSB60102A.raw	P25685|DNJB1_HUMAN
TVIAKVNNV	31.41	23432.9	19118.4	15669.4	10702.2	9848.13	18.22	956.566	9	-1.5	479.289	33.33		354920	2	F2:9136	MSB60102A.raw	P26639|SYTC_HUMAN
KIGTVMTFL	229.55	17561.8	12928.9	31490.4	16331.3	18519	25.92	1008.57	9	2.5	505.292	90.17		321310	2	F2:26589	MSB60102A.raw	P30046|DOPD_HUMAN
KIVPVEITI	187.66	13639.5	20742.9	10599.6	16561.8	22165.5	17.8	1010.64	9	0.3	506.326	82.98		416600	2	F2:24283	MSB60102A.raw	P30085|KCY_HUMAN
LAAARLAAA	201.45	36332.8	1312.57	10018.4	10014.8	10776.5	30.95	826.502	9	0	414.259	31.61		4050700	2	F2:8641	MSB60102A.raw	P30101|PDIA3_HUMAN
NQDDSILKV	98.57	29207.3	34085.2	18302.7	24699.7	11658.9	23.55	1030.53	9	0.6	516.272	52.85		733020	2	F2:15002	MSB60102A.raw	P30530|UFO_HUMAN
GQLDFSEFLNL	112.75	21532.7	36946.1	31498.9	34919.5	24187.4	32.34	1281.62	11	-0.2	641.819	114.34		1097000	2	F2:35700	MSB60102A.raw	P31949|S10AB_HUMAN
LILEGNDIEL	277.06	33117.4	20366.3	26005.1	15933.5	27084.8	33.52	1127.61	10	1.4	564.812	105.88		1759100	2	F2:32188	MSB60102A.raw	P32969|RL9_HUMAN
RQLEAIVRI	5.92	1935.81	25651	10201.6	20751.4	9717.52	13.74	1096.67	9	2.3	549.344	59.72	122600	587200	2	F2:17108	MSB60102A.raw	P33992|MCM5_HUMAN
KQDETQTKI	327.98	21788.9	31117.2	24495	20080.2	21667.6	34.16	1089.57	9	-0.6	545.79	12.23		103770	2	F2:2876	MSB60102A.raw	P35221|CTNA1_HUMAN
KVVEDGILKL	424.89	28281.9	19556.5	30642.1	22768.3	24829.1	25.65	1112.68	10	-0.2	557.347	64.98	1636200	1588900	2	F2:18734	MSB60102A.raw	P35221|CTNA1_HUMAN
NTIPLFVQL	68.42	7439.24	14951.8	11640.8	4283.34	3360.17	32.85	1043.6	9	-0.1	522.808	110.62	6596800	8135800	1	F1:34707	MSB60101A.raw	P35222|CTNB1_HUMAN:P14923|PLAK_HUMAN
LITDLLNEA	85.51	41220.9	25995.5	18752.7	31713.3	25925.3	24.53	1000.54	9	0.3	501.279	101.35		7224800	2	F2:30556	MSB60102A.raw	P36543|VATE1_HUMAN
QVLEDFPTI	10.56	6569.29	22773.8	6464.16	17075.8	18752.7	34.28	1060.54	9	0	531.279	103.84		7903600	2	F2:31348	MSB60102A.raw	P37268|FDFT_HUMAN
EQISQFLQA	284.74	32531.5	29136.7	16916.2	37584.3	22157.8	40.73	1062.53	9	-0.3	532.274	85.83	7268300	7832200	2	F2:25214	MSB60102A.raw	P37802|TAGL2_HUMAN
KVPEWVDTV	7.48	4108.13	24801.4	14656.5	573.03	5844.92	38.15	1071.56	9	0.1	536.787	71.95		14426000	2	F2:20848	MSB60102A.raw	P39019|RS19_HUMAN
TVFSHAQTV	53.6	17398.1	10580.4	4851.25	3358.64	1992.4	22.91	988.498	9	-0.8	495.256	34.81		525150	2	F2:9590	MSB60102A.raw	P42677|RS27_HUMAN:Q71UM5|RS27L_HUMAN
LVIGQFLEA	17.45	32947.3	13873.6	11570.8	23784.4	13087.8	28.17	988.559	9	-2.1	495.286	107.42		1524000	2	F2:32845	MSB60102A.raw	P43686|PRS6B_HUMAN
KIYEGQVEV	6.53	26429.4	13918	11831.7	4413.47	6436.45	25.1	1063.55	9	0.1	532.785	45.22	516180	3096000	2	F2:12762	MSB60102A.raw	P46777|RL5_HUMAN
YLTNEGIQYL	16.57	16700.9	18304.3	23668.9	2764.49	2486.58	41.54	1212.6	10	0.1	607.309	91.23	7791600	8128900	1	F1:27391	MSB60101A.raw	P46783|RS10_HUMAN
NQWDGTQHGV	45.14	23064.6	28588.9	16157.8	32988.3	22611.2	12.82	1140.49	10	0.5	571.255	30.13		113500	2	F2:8166	MSB60102A.raw	P46939|UTRO_HUMAN
FLLGPRLVLA	24.06	32400.8	13621.8	17558.2	21827.8	17373.2	30.85	1097.7	10	-0.6	549.855	103.73	4427200	6497700	2	F2:31345	MSB60102A.raw	P49755|TMEDA_HUMAN
VVVGDLVEV	6.04	29756.3	23673.7	15912	13952.9	14458.2	25.69	927.528	9	-0.3	464.771	90.75		5438800	2	F2:26745	MSB60102A.raw	P50993|AT1A2_HUMAN:P05023|AT1A1_HUMAN
FSIPDSLLI	53.54	5190.15	21609.3	2698.79	2688.1	3314.02	13.13	1003.56	9	0.5	502.787	106.95		31420000	2	F2:32725	MSB60102A.raw	P54819|KAD2_HUMAN
IIIPEIQKV	10.56	19601.2	30455.3	9836.42	11610.6	8772.95	26.17	1051.66	9	-1	526.839	79.57	0	22117000	2	F2:23175	MSB60102A.raw	P55060|XPO2_HUMAN
AIIPYIPTL	6.05	7831.39	7070.54	14488.8	1064.78	1303.47	14.39	999.601	9	-0.9	500.807	110.9		1519500	2	F2:34344	MSB60102A.raw	P55060|XPO2_HUMAN
NVFFGSIWL	151.29	20693.5	17708	13759.1	10646.8	10042.1	30	1081.56	9	0.2	541.787	115.81	0	2375300	2	F2:36268	MSB60102A.raw	P55061|BI1_HUMAN
SLAQYLINA	12.67	33263.2	25155.5	22560.4	25701.3	19636.9	25.29	991.534	9	-0.6	496.774	98.63	481300	3497300	1	F1:30114	MSB60101A.raw	P57721|PCBP3_HUMAN:Q15365|PCBP1_HUMAN
QIYDIFQKL	118.22	13618	18517.6	13384.5	7949.03	4455.59	21.77	1166.63	9	1.8	584.325	103.69		2813900	2	F2:31332	MSB60102A.raw	P60842|IF4A1_HUMAN
KLLEPVLLL	12.24	4364.55	15927.2	17731.4	5167.34	3611.32	17.41	1036.69	9	0.1	519.352	106.28		14490000	2	F2:32365	MSB60102A.raw	P62249|RS16_HUMAN
RQYAKDIGF	254.7	2923.95	18869.6	26013.5	19775.9	6617.44	39.51	1096.57	9	-0.2	549.29	40.94	1901300	1043700	1	F1:11487	MSB60101A.raw	P62273|RS29_HUMAN
AVVTQVNKV	172.8	35251.2	24757.5	22836.7	23614.6	22995.1	26.57	956.566	9	-0.1	479.29	27.09	286770	690520	2	F2:7232	MSB60102A.raw	P62487|RPB7_HUMAN
SVLGAITSV	4.94	22300.7	6625.4	12815.2	6883.12	10525.4	28.7	845.486	9	0.4	423.75	90.34		1168700	2	F2:26597	MSB60102A.raw	P62495|ERF1_HUMAN
GVLKVFLENV	64.43	33709.6	33103.8	25180.8	42083.8	37998.9	46.67	1116.65	10	0.1	559.335	105.28	12331000	9062300	2	F2:31918	MSB60102A.raw	P62805|H4_HUMAN
IQTAVRLLL	107.8	4637.98	11288.5	14670.4	8544	2732.55	22.38	1025.66	9	1	513.838	84.59	308670	1027800	1	F1:25016	MSB60101A.raw	P62807|H2B1C_HUMAN:Q16778|H2B2E_HUMAN:P33778|H2B1B_HUMAN:Q99879|H2B1M_HUMAN:Q93079|H2B1H_HUMAN:P58876|H2B1D_HUMAN:P23527|H2B1O_HUMAN:Q5QNW6|H2B2F_HUMAN:Q99880|H2B1L_HUMAN:Q99877|H2B1N_HUMAN:Q96A08|H2B1A_HUMAN:O60814|H2B1K_HUMAN:P06899|H2B1J_HUMAN:P57053|H2BFS_HUMAN
NIIPYITNV	4.73	22781.9	21312	7820.05	8002.8	3611.12	27.84	1045.58	9	-1.1	523.797	104.62	2693000	8463500	2	F2:31652	MSB60102A.raw	Q00610|CLH1_HUMAN
VQIPFFAKL	16.2	1197.55	22562.3	13654.8	3925.5	1451.62	32.4	1061.63	9	0.8	531.821	106.67	1049100	1151800	1	F1:33137	MSB60101A.raw	Q12882|DPYD_HUMAN
KILPTLEAV	5.43	22894.1	12758	13801	14467.2	18288.3	23.35	982.606	9	-1	492.31	74.65	167950	876290	2	F2:21602	MSB60102A.raw	Q12905|ILF2_HUMAN
TVADVVLWSV	5.84	25223.3	21574	10873.6	25639.9	21734.2	21.08	1087.59	10	0.3	544.803	110.12		881850	2	F2:33963	MSB60102A.raw	Q13155|AIMP2_HUMAN
SGLLKVWQV	229.74	11534.1	28277.6	9433.76	25830.9	17279.7	16.5	1028.6	9	-3.5	515.306	87.11		816760	2	F2:25633	MSB60102A.raw	Q13685|AAMP_HUMAN
AQLELISRI	9.57	8536.61	29805.6	14783.8	26366.9	17045.2	26.71	1041.62	9	-0.4	521.816	83.68		673950	2	F2:24440	MSB60102A.raw	Q14004|CDK13_HUMAN
LLDRFLATV	14.32	20839.8	24049.3	13025.6	7990.85	13587.9	28.99	1046.61	9	0	524.313	93.09		6970400	2	F2:27566	MSB60102A.raw	Q14094|CCNI_HUMAN
SLLDRFLATV	7.04	19681.2	18199.2	14678.1	13047.2	13389	20.5	1133.64	10	-2.4	567.828	110.6		1577300	2	F2:34204	MSB60102A.raw	Q14094|CCNI_HUMAN
FKSLADGILL	453.1	25603	25053.3	19714.8	18082.3	10420	33.31	1075.63	10	-0.6	538.821	95.92	29681000	20810000	1	F1:29058	MSB60101A.raw	Q14651|PLSI_HUMAN
FVNWINKAL	202.46	23802.1	1150.61	12593.1	2048.56	1937.11	34.78	1103.61	9	-1	552.813	89.24		3369500	2	F2:26312	MSB60102A.raw	Q14651|PLSI_HUMAN:P13797|PLST_HUMAN:P13796|PLSL_HUMAN
VQYNEPLKV	61.72	15228	35262.7	10673	17021	5763.22	22.02	1088.59	9	-0.5	545.3	53.53		432300	2	F2:15190	MSB60102A.raw	Q14690|RRP5_HUMAN
FLKDLVASV	9.15	26487	11481.9	8772.66	5165.1	1630.62	17.73	990.575	9	1.3	496.295	81.6		319730	2	F2:23778	MSB60102A.raw	Q14919|NC2A_HUMAN
FISPFGHGL	13.93	15173.4	3634.95	11130.2	570.24	1158.54	19.28	973.502	9	0.2	487.758	85.32		935090	2	F2:25015	MSB60102A.raw	Q15019|SEPT2_HUMAN:Q99719|SEPT5_HUMAN:O43236|SEPT4_HUMAN
KLVGEFLEV	3.85	14041.1	24379.5	16983.5	11962.4	8769.91	22.17	1032.59	9	-0.6	517.3	84.87		1351700	2	F2:24948	MSB60102A.raw	Q15046|SYK_HUMAN
YVIDPIKGLKL	385.43	25832.3	18967.4	28781.7	3190.11	11928.5	41.96	1257.77	11	-0.6	420.264	90.08		1529700	2	F2:26590	MSB60102A.raw	Q15149|PLEC_HUMAN
FVDPVLNQL	7.2	16965.9	9138.29	12323.7	1680.57	1291.43	23.69	1043.57	9	2	522.791	105.72		1041200	2	F2:32170	MSB60102A.raw	Q15652|JHD2C_HUMAN
NIANHFFTV	4.16	8202.05	10812.8	4559.07	5772.52	2434.43	33.73	1061.53	9	-0.4	531.772	80.25		6185500	2	F2:23327	MSB60102A.raw	Q16222|UAP1_HUMAN
SLLQTNIAL	103.44	20724.7	3504.12	24543	3295.25	7165.89	24.15	971.565	9	0.4	486.79	97.58		1066100	2	F2:29191	MSB60102A.raw	Q16787|LAMA3_HUMAN
AQLPSLLSV	3.2	13905.6	20682.1	12120.9	14654.2	8770.38	22.95	926.544	9	-2.1	464.278	103.84		3165900	2	F2:31393	MSB60102A.raw	Q2KHR3|QSER1_HUMAN
VLDDKLVFV	8.79	23875.4	31161	21297.5	5895.23	5971.23	24.55	1046.6	9	-0.7	524.308	88.42	3157100	2728300	2	F2:25972	MSB60102A.raw	Q4KMQ2|ANO6_HUMAN
VLLPLRVTL	132.56	6601.07	3676.49	16249.4	2898.53	4665.41	14.96	1022.69	9	0.6	512.35	102.41		1748800	2	F2:30914	MSB60102A.raw	Q53EU6|GPAT3_HUMAN
LLFSAFSRA	41.33	30241.2	20889.9	11804.2	21570	17839.7	30.39	1010.55	9	0	506.285	83.22		1811600	2	F2:24283	MSB60102A.raw	Q5I7T1|AG10B_HUMAN:Q5BKT4|AG10A_HUMAN
SVLQSIEKI	391.06	14420.4	25232.6	13310.1	20055.6	23447.3	16.03	1015.59	9	-0.9	508.803	80.2		706690	2	F2:23366	MSB60102A.raw	Q5T3J3|LRIF1_HUMAN
RVVDYLTKL	15.4	10817.4	4126.22	19380.9	3872.43	2643.5	35.89	1105.65	9	0	553.832	71.51	827450	1115900	2	F2:20699	MSB60102A.raw	Q5TFE4|NT5D1_HUMAN
VLLKARLVPA	78.39	34177.1	14763.3	26809	31733.9	30932.9	30.34	1078.72	10	-3	540.367	53.6		2299900	2	F2:15293	MSB60102A.raw	Q6P995|F171B_HUMAN
NQVGIVLNV	10.42	21860	30741.7	10266.4	28833.4	9727.09	37.29	954.55	9	0.5	478.282	85.68		2714000	2	F2:25070	MSB60102A.raw	Q7Z3K3|POGZ_HUMAN
VQDKLFVGL	75.48	13407.1	24065	27170.3	11836.4	10236.8	27.89	1017.59	9	-2.1	509.799	81.29		432410	2	F2:23690	MSB60102A.raw	Q7Z7F0|KHDC4_HUMAN
TVISLLTGL	17.91	21710.8	9931.7	21222.5	8976.99	12952	23.58	915.564	9	-0.6	458.789	112.22	3393300	9425100	1	F1:35330	MSB60101A.raw	Q8N3U4|STAG2_HUMAN:Q8WVM7|STAG1_HUMAN
ALFPAPLAQI	100.71	4827.16	19799.9	15862.7	3965.32	13140.1	22.88	1039.61	10	-1	520.81	109.58		1094100	2	F2:33719	MSB60102A.raw	Q8ND24|RN214_HUMAN
LQMEPAAFQAL	40.14	11841.1	10167.4	22932	3759.72	12910.2	45.04	1217.61	11	-0.4	609.813	102.87	66161000	62378000	1	F1:31456	MSB60101A.raw	Q8NFU3|TSTD1_HUMAN
FLADPSAFVAA	37.17	34506.7	20161.1	24799.5	13126.6	22004.7	24.87	1107.56	11	-7.2	554.783	97.86		3126500	2	F2:29296	MSB60102A.raw	Q8NHW5|RLA0L_HUMAN:P05388|RLA0_HUMAN
RVFSDIIYTV	7.25	1503.67	17412.6	6761.4	18744	9216.94	31.99	1211.65	10	0.5	606.835	90.48	1143200	1227000	2	F2:26703	MSB60102A.raw	Q8NI27|THOC2_HUMAN
SQLELGVHL	18.16	12512.6	17530	19930.8	12321.9	7437.47	22.68	994.545	9	1.6	498.281	76.77		373620	2	F2:22322	MSB60102A.raw	Q8TDM6|DLG5_HUMAN
SLFGGSVKL	41.3	13960.2	10872.8	16890	1787.6	1791.41	24.36	906.518	9	-0.1	454.266	78.56	463160	1483800	2	F2:22840	MSB60102A.raw	Q8WUM4|PDC6I_HUMAN
GTYTGFIKV	17.91	22844.1	29105.5	14776.1	20373.4	16992.3	22.99	984.528	9	2.9	493.273	71.42	169410	1042400	1	F1:20838	MSB60101A.raw	Q8WWW0|RASF5_HUMAN
QLIDKVWQL	7.32	5795.62	22283.3	16194.2	8349.71	1275.42	30.96	1141.65	9	-0.7	571.832	95.37	6110900	32015000	2	F2:28369	MSB60102A.raw	Q92503|S14L1_HUMAN
TVIATNILL	141.77	13962.9	13983.6	16855.7	6783.82	8557.32	18.43	956.591	9	-4.6	479.3	101.59	439330	3690100	2	F2:30717	MSB60102A.raw	Q92526|TCPW_HUMAN:P40227|TCPZ_HUMAN
VVVKEVVKV	114.26	29112.1	29784.3	15538.9	22851.5	22472.2	30	997.654	9	-0.1	499.834	39.62	349890	575480	1	F1:10992	MSB60101A.raw	Q92817|EVPL_HUMAN
YILPFSEVL	22.68	7623.06	8387.28	9840.89	843.39	1120.95	30.7	1079.59	9	0.2	540.803	113.13	1249300	1506100	2	F2:35214	MSB60102A.raw	Q93063|EXT2_HUMAN
IITDLLRSV	27.28	31204.2	16234.1	11287.5	10493.3	8896.16	31.64	1028.62	9	0	515.319	94.26	11989000	14111000	2	F2:28073	MSB60102A.raw	Q96AE4|FUBP1_HUMAN
NQINGSFAL	15.61	10023	8305.65	15879.7	7532.79	1911.79	27.16	962.482	9	-0.2	482.248	75.74	495620	1741400	1	F1:22156	MSB60101A.raw	Q96DY7|MTBP_HUMAN
SVLGALIGV	2.96	25433	17725.3	14475.1	21278	19763.7	17.67	827.512	9	-1.6	414.762	109.59		23939000	2	F2:33776	MSB60102A.raw	Q96ER9|MITOK_HUMAN
RIPEEGLLEV	61.82	19193.9	2121.07	8503.51	2862.13	20494.8	14.9	1153.63	10	-0.2	577.824	80.53		2674300	2	F2:23485	MSB60102A.raw	Q96JB6|LOXL4_HUMAN
LLSTLGPATV	272.9	30410.2	21337.4	14458.9	19714.4	27859.7	16.99	970.57	10	-3	486.291	106.27		4023900	2	F2:32560	MSB60102A.raw	Q96LA6|FCRL1_HUMAN
QVIPVLPQV	5.13	20495	22770.6	7629.66	17756.2	12533.3	15.38	991.607	9	-2.5	496.809	98.72		426170	2	F2:29685	MSB60102A.raw	Q96SW2|CRBN_HUMAN
GVLDTLTKV	8.49	35949.6	28312.5	21442.8	28550.6	24671.9	27.47	944.554	9	-0.8	473.284	80.73	2123100	4037000	2	F2:23621	MSB60102A.raw	Q99417|MYCBP_HUMAN
FVLPVATQI	17.71	11306	16037.5	3945.64	7135.64	5847.01	32.87	986.58	9	2.9	494.299	105.58	168540	2349200	1	F1:32659	MSB60101A.raw	Q99622|C10_HUMAN
SLFAGGMLRV	27.53	17442	24451.8	14490	20421.7	17299	32.83	1049.57	10	-1.7	525.791	91.84		2275800	2	F2:27234	MSB60102A.raw	Q9BVK6|TMED9_HUMAN
GVVPTIQKV	75.06	35020.1	28105.9	19606.1	23474	20332.2	21.01	939.575	9	-1.1	470.794	52.79	1335000	831120	2	F2:15043	MSB60102A.raw	Q9BX79|STRA6_HUMAN
NIVEKLREV	52.37	32768.1	17705.5	17849	12314.5	7489.79	26.81	1098.64	9	-1	550.327	58.92	0	704030	2	F2:16863	MSB60102A.raw	Q9C035|TRIM5_HUMAN
GLLDRLSVL	65.7	24563	8265.3	30534.8	6524.52	5989.16	29.96	984.597	9	0.4	493.306	104.58	3183800	3767000	2	F2:31654	MSB60102A.raw	Q9H0F7|ARL6_HUMAN
YAIEVDPVL	34.17	18473.8	7885.9	4685.85	931.27	1272.67	16.63	1017.54	9	-0.1	509.776	99.1		653220	2	F2:29679	MSB60102A.raw	Q9H0P0|5NT3A_HUMAN
YQLPEILRT	31.12	28070.6	38114.2	23890.4	35356.7	17794.8	32.37	1131.63	9	-0.7	566.821	83.54		6452400	2	F2:24372	MSB60102A.raw	Q9H2U1|DHX36_HUMAN
NLLDLLTEV	4.05	26425.2	26644.8	11496.7	14301.9	7036.81	28.35	1028.58	9	0.5	515.295	116.42		728440	2	F2:36551	MSB60102A.raw	Q9H3U1|UN45A_HUMAN
TQTAVITRI	206.12	15302	29571.4	13036.8	24665	16186	26.89	1001.59	9	0.2	501.801	45.97		1522900	2	F2:12947	MSB60102A.raw	Q9H4H8|FA83D_HUMAN
TVLGKIWKL	26.33	3602.42	16596.8	15575.9	15844.7	3885.81	23.28	1056.67	9	0.1	529.342	79.65		962110	2	F2:23189	MSB60102A.raw	Q9H4M9|EHD1_HUMAN
GVLENIFGV	2.39	22969	29407.8	15796.9	27170.8	19622.2	34.97	946.512	9	0.4	474.264	111.39		2954300	2	F2:34518	MSB60102A.raw	Q9H6A9|PCX3_HUMAN
SQDPGTHVV	26.92	19279.4	13984.8	16736.5	6514.22	5463.15	18.41	938.446	9	-0.6	470.23	18.14	312420	795540	1	F1:4618	MSB60101A.raw	Q9H8H0|NOL11_HUMAN
SQMATILNL	5.9	2641.25	7338.74	12811.6	5023.68	1575.71	19.48	989.521	9	-2.4	495.767	102.61		308590	2	F2:30906	MSB60102A.raw	Q9H9E3|COG4_HUMAN
LAVDYGSYI	286.23	25198.2	13010.3	3711.62	2806.56	6111.17	14.04	999.491	9	-6.9	500.75	58.45	40535000	84022000	1	F1:17440	MSB60101A.raw	Q9HC58|NCKX3_HUMAN
FVDGLTFKV	3.91	19462.6	22770.1	7244.63	12058.5	7496.69	31.91	1024.56	9	1.3	513.288	86.82	8858300	3238300	1	F1:26281	MSB60101A.raw	Q9HCE1|MOV10_HUMAN
ATIGVDFKV	14.04	19170.8	29520	13885.5	24811.4	22724	21.19	948.528	9	0.5	475.272	74.94		316160	2	F2:21686	MSB60102A.raw	Q9NP72|RAB18_HUMAN
AQIDHYLGL	6.11	8969.61	18549.9	23475	6637.88	1616.79	14.38	1028.53	9	5.4	515.275	76.82		826660	2	F2:22309	MSB60102A.raw	Q9NQC3|RTN4_HUMAN
FALVGSYTL	29.7	5234.98	4035.79	2979.26	1186.62	1806.85	22.7	969.517	9	-0.4	485.766	105.36		1055800	2	F2:32008	MSB60102A.raw	Q9NQW6|ANLN_HUMAN
FAIPLIEKL	41.75	14838.1	16381.8	4770.56	3102.46	1275.09	27.75	1042.64	9	1.3	522.329	107.42	6841000	29876000	1	F1:33388	MSB60101A.raw	Q9NR30|DDX21_HUMAN
GSYTGFIKV	62.48	23595.7	29846.3	13449.7	19364.9	16146.3	29.44	970.512	9	1	486.264	71.16		331570	2	F2:20588	MSB60102A.raw	Q9NS23|RASF1_HUMAN
AQLELISRL	10.25	12233.6	23359.7	23862	17933	8070.62	26.71	1041.62	9	-0.4	521.816	83.68		673950	2	F2:24440	MSB60102A.raw	Q9NYV4|CDK12_HUMAN
LQIEDFEARI	32.6	17386.8	30825	13611.6	30940.2	26822.4	20.34	1232.64	10	0	617.327	93.04		1671900	2	F2:27658	MSB60102A.raw	Q9P0J0|NDUAD_HUMAN
IVIGVLHQL	11.94	5595.66	10601.4	13569	6467.45	4064.49	27.49	990.623	9	0.7	496.319	84.02	1079600	9776300	2	F2:24538	MSB60102A.raw	Q9UH92|MLX_HUMAN
SVLGSLSSV	5.21	23066.6	4108.13	12907.4	5798.38	11989	27.73	847.465	9	-0.3	424.74	82.97		1018200	2	F2:24234	MSB60102A.raw	Q9UKX7|NUP50_HUMAN
GQNDIHHKV	29.6	22382.7	32222.8	18324.1	29375	10391	34.5	1046.53	9	-1.1	524.27	10.52		133100	2	F2:2364	MSB60102A.raw	Q9UN86|G3BP2_HUMAN
ALLDWVTSV	3.04	21462	21067.2	14636.4	9444.28	6144.06	29.89	1002.54	9	-0.9	502.276	111.69		922990	2	F2:34645	MSB60102A.raw	Q9UPN3|MACF1_HUMAN
QQVQRLPFL	31.25	11037.5	19100.2	23638.4	14509.2	5755.19	30.77	1127.65	9	-0.9	564.829	82.45		145680	2	F2:24085	MSB60102A.raw	Q9Y244|POMP_HUMAN
IVDPFQILV	13.71	18270.9	26993.3	6562.19	7285.5	8009.04	26.78	1042.61	9	0.9	522.311	114.35	0	2760400	1	F1:36127	MSB60101A.raw	Q9Y3C4|TPRKB_HUMAN
SQFQQEFPSL	84.02	4246.1	15397.1	18764.1	10892.3	8212.98	40.53	1209.57	10	0	605.79	93.17		885530	2	F2:27641	MSB60102A.raw	Q9Y520|PRC2C_HUMAN
TVADHIQKV	17.33	25639.1	17864.3	14076.7	6720.19	3887.33	22.2	1009.56	9	-0.1	505.785	22.69	571460	274260	2	F2:5963	MSB60102A.raw	Q9Y678|COPG1_HUMAN
RYLPTGSFPFL	513.58	62.79	353.79	10466.6	2283.88	3217.81	39.3	1296.69	11	-0.4	649.35	106.69	10761000	25577000	2	F2:32535	MSB60102A.raw	Q13454|TUSC3_HUMAN
LLPNHSYVF	1679.47	50.14	13419.3	20315.5	161.22	414.11	24.86	1088.57	9	0.4	545.29	72		838160	2	F2:20872	MSB60102A.raw	P16144|ITB4_HUMAN
ILPPQLALF	869.97	53.33	21715.2	21291.1	229.18	1153.14	33.31	1010.62	9	-1.2	506.315	111.38	8316900	4526900	1	F1:34980	MSB60101A.raw	P35869|AHR_HUMAN
IYSIDFTRF	25991.9	15.87	35138.2	30164.8	20892.7	432.82	14.34	1160.59	9	-4.3	581.298	98.72		580340	2	F2:29538	MSB60102A.raw	A6NIH7|U119B_HUMAN
RYSRKGFLF	19121.3	5.61	18992.9	27905.9	15359.7	219.71	35.25	1172.65	9	1	391.889	48.83		2690400	2	F2:13782	MSB60102A.raw	O00267|SPT5H_HUMAN
IYVPVSLGF	9379.92	13.56	26412.6	22329.4	15967.4	177.34	36.14	993.553	9	1.4	497.785	109.35	3496600	6321800	1	F1:34219	MSB60101A.raw	O14753|OVOL1_HUMAN
VYGSFASKL	22982.2	78.17	26588.9	29831.1	7560.47	434.33	31.64	970.512	9	1.1	486.264	60.01	1519600	2292400	2	F2:17295	MSB60102A.raw	O14977|AZIN1_HUMAN
IYPVNAISF	20850	22.57	25231	30694.2	1501.28	120.71	27.74	1022.54	9	1.6	512.28	102.38	1571700	2939400	1	F1:31414	MSB60101A.raw	O43684|BUB3_HUMAN
LYPLTNYTF	14510.1	6.5	23632.5	25063.6	3565.73	150.1	39.62	1130.56	9	-0.7	566.289	106.2	3961900	19472000	2	F2:32423	MSB60102A.raw	O43809|CPSF5_HUMAN
TYIPGTQITF	14284.4	13.02	21010.5	26519.4	4822.72	309.51	19.65	1139.59	10	-0.9	570.8	103.92		2033800	2	F2:31482	MSB60102A.raw	O75376|NCOR1_HUMAN
VYKKSIFVF	23174.7	9.21	29070.8	30018.3	21136.8	104.63	26.71	1129.65	9	0.5	565.834	72.15		128570	2	F2:20892	MSB60102A.raw	O95139|NDUB6_HUMAN
YYNPHLLLNTL	11903.5	143.36	1029.01	7159.45	9656.83	151.68	33.86	1359.72	11	-0.3	680.866	94.84		613980	2	F2:28257	MSB60102A.raw	O95373|IPO7_HUMAN
TYINPFVSF	9959.47	10.46	19252.8	26390	8385.92	101.05	29.56	1086.54	9	3.9	544.279	109.98		669140	2	F2:33963	MSB60102A.raw	O95486|SC24A_HUMAN:O95487|SC24B_HUMAN
VYQLRFQFL	17714.1	21.83	23061.4	30471.5	4924.54	172.39	35.65	1212.67	9	-0.7	607.34	106.4		1352900	2	F2:32459	MSB60102A.raw	O95602|RPA1_HUMAN
SYIDVLPEF	2161.41	11.75	22745.9	23269.2	10950.9	51.38	16.37	1081.53	9	1.8	541.775	110.27		2222500	2	F2:34112	MSB60102A.raw	P08581|MET_HUMAN
SYKNGFLNL	15177	63.27	17612.1	31287.3	7653.55	134.15	24.1	1054.54	9	-0.4	528.279	76.98		724070	2	F2:22374	MSB60102A.raw	P22314|UBA1_HUMAN
YFLLSHSLL	2634.51	217.32	10616.7	18927	2331.44	374.27	33.83	1091.6	9	0	546.808	104.32		4449400	2	F2:31521	MSB60102A.raw	P27695|APEX1_HUMAN
RYVPRASYF	16320.4	12.07	13014.8	29659.9	4915.55	28.93	18.02	1157.6	9	1.1	579.807	46.83		527380	2	F2:13186	MSB60102A.raw	P30281|CCND3_HUMAN
RYLDEINLL	3175.89	24.84	27505.7	25276.9	9835.25	256	23.79	1147.62	9	-0.4	574.819	94.6		6516700	2	F2:28198	MSB60102A.raw	P30679|GNA15_HUMAN
TYFSTPLLL	5676.65	19.28	22043.8	13823.7	4380.5	41.17	30.26	1053.57	9	-0.7	527.794	110.8	0	2787500	2	F2:34273	MSB60102A.raw	P40926|MDHM_HUMAN
SYPDLLPTF	8555.1	11.54	25499.9	28985.7	2181.33	77.77	23.44	1051.52	9	-1.5	526.768	109.58		1774300	2	F2:33786	MSB60102A.raw	P41214|EIF2D_HUMAN
AYLEAIHNF	6241.01	8.96	30509.4	29058	18666.3	283.46	39.36	1076.53	9	-0.6	539.271	75.07		2141500	2	F2:21789	MSB60102A.raw	P53680|AP2S1_HUMAN
KYEELFPAF	10948.1	36.56	22423.1	30472.8	12178.9	499.97	31.74	1142.56	9	-2.4	572.288	96.47	2456500	11067000	2	F2:28885	MSB60102A.raw	P54920|SNAA_HUMAN
VYNKVHITL	12079.6	25.43	15316.7	21999.2	6180.53	74.5	17.79	1085.62	9	1.5	362.882	52.53		325710	2	F2:14922	MSB60102A.raw	P61457|PHS_HUMAN
RYIPTAAAF	7727.53	10.23	7948.34	25414	4331.81	64.31	24.76	1008.54	9	3.4	505.279	62.12		4302200	2	F2:17902	MSB60102A.raw	P61619|S61A1_HUMAN:Q9H9S3|S61A2_HUMAN
IYDSVKVYF	10127.5	99.74	22999.6	27708.2	13100.1	238.07	34.36	1132.58	9	-1.1	567.297	81.48	4508200	486900	2	F2:23765	MSB60102A.raw	Q00325|MPCP_HUMAN
KYQEVTNNL	8360.19	35.79	19221.1	29073.4	6720.7	366.65	29.26	1107.56	9	0.7	554.786	35.25	592070	666330	1	F1:9685	MSB60101A.raw	Q14444|CAPR1_HUMAN
SYPTFFPRF	12927.8	5.8	28549.4	27088.7	2482.23	65.51	32.56	1160.57	9	-1.7	581.289	101.94		3905100	2	F2:30687	MSB60102A.raw	Q14527|HLTF_HUMAN
LYSNIAFNL	4542.82	30.31	24917.9	16585.4	13567.4	223.85	15.81	1053.55	9	-9.3	527.777	104.73		3902600	2	F2:31906	MSB60102A.raw	Q14674|ESPL1_HUMAN
AYPEYLITF	10664.8	12.75	29814.3	33702.7	2572.48	123.3	30.85	1115.55	9	0	558.784	109.73	1178100	1824800	2	F2:33870	MSB60102A.raw	Q460N3|PAR15_HUMAN:Q460N5|PAR14_HUMAN
TYISWKEEL	8219.64	55.16	20567	24609.2	10610.9	137.37	36.37	1167.58	9	-0.6	584.798	78.43	4597500	5438200	2	F2:22795	MSB60102A.raw	Q709C8|VP13C_HUMAN
QYSPLLAAF	15289.2	31.95	19005.8	28857.7	16346.2	243.99	31.68	1008.53	9	2.6	505.273	107.97	0	9522200	2	F2:33119	MSB60102A.raw	Q7L1Q6|BZW1_HUMAN
NYNAVFNLL	9530.92	30.77	23321.3	20623.8	12284	96.27	16.55	1066.54	9	-0.6	534.279	110.22		4256700	2	F2:34038	MSB60102A.raw	Q8IYR2|SMYD4_HUMAN
LYAPYSTHF	13816.7	9.4	19542.2	22757.3	5007.67	38.61	24.67	1097.52	9	-1.8	549.765	67.39		922830	2	F2:19527	MSB60102A.raw	Q8NFJ5|RAI3_HUMAN
SYADQMFLL	1676.96	33.48	22072.9	22061	6013.38	62.39	31.51	1086.51	9	-0.8	544.26	110.17		2899300	2	F2:33963	MSB60102A.raw	Q8TEL6|TP4AP_HUMAN
LYYDAIWHF	4587.47	13.61	35833.5	16310.7	21030.3	123.99	36.36	1226.58	9	-0.2	614.295	107.92		12936000	2	F2:33079	MSB60102A.raw	Q92482|AQP3_HUMAN
IYPWVHVVI	13629	19.63	23944.5	21181.5	1497.76	404.96	22.18	1124.64	9	-0.1	563.326	104.65		1377900	2	F2:31674	MSB60102A.raw	Q969F9|HPS3_HUMAN
LYFHINQTL	5275.52	45.69	21194.8	14578.2	4345.33	83.21	27.46	1147.6	9	-2	574.807	84.29		1829900	2	F2:24599	MSB60102A.raw	Q969W3|F104A_HUMAN
IYVHDLLTF	13900.9	10.62	31991.1	27606.5	19294.7	435.35	36.59	1119.6	9	0.5	560.806	102.05		4482800	2	F2:30744	MSB60102A.raw	Q96JC1|VPS39_HUMAN
VYAQVARLF	22888.6	8.31	25633.8	27038.3	12319.4	78.92	31.03	1065.6	9	-0.1	533.806	80.68		547600	2	F2:23530	MSB60102A.raw	Q96ST3|SIN3A_HUMAN
YYEHVKARF	23872.8	61.95	24521	32402.9	20585	238.79	38.95	1211.61	9	0.2	606.812	28.88	0	2505400	1	F1:7830	MSB60101A.raw	Q9BV36|MELPH_HUMAN
HYSLFPLLF	18165.6	9.64	29447.9	19101.1	21231.5	122.46	15.98	1135.61	9	-1.7	568.81	113.47		660180	2	F2:35345	MSB60102A.raw	Q9BVK2|ALG8_HUMAN
LYIPIFSTF	6087.55	4.64	20993.7	16146.7	9796.48	84.09	30.26	1099.6	9	0.1	550.805	115.75		1846400	2	F2:36262	MSB60102A.raw	Q9C0I1|MTMRC_HUMAN
YYLNEIQSF	7118.28	5.95	25219.8	24033.8	9941.81	34.48	24.29	1175.55	9	0.5	588.783	98.98		7609100	2	F2:29625	MSB60102A.raw	Q9H0A9|SPC1L_HUMAN
VYNPVIYVF	9894.91	5.27	24892.6	18929.5	14065.4	33.32	31.64	1112.59	9	1.5	557.303	110.12		2831900	2	F2:34006	MSB60102A.raw	Q9H1Y3|OPN3_HUMAN
FYSRLLQKF	17726.6	13.12	29089.7	25941.6	20027.4	102.03	37.93	1200.67	9	0.8	401.229	73.69	0	2889700	2	F2:21356	MSB60102A.raw	Q9H900|ZWILC_HUMAN
KYQELQVLF	11408	6.99	28568.2	25987.4	21483.2	298.4	15.68	1166.63	9	-5.5	584.321	88.96		583250	2	F2:26178	MSB60102A.raw	Q9H9H4|VP37B_HUMAN
SYIPSTVFF	7767.85	9.34	20970.8	23425.3	5030.37	38.72	31.71	1059.53	9	0	530.771	109.18		2296700	2	F2:33660	MSB60102A.raw	Q9NX01|TXN4B_HUMAN
NYRDTFFNL	11996.3	104.86	18756.4	26114.2	12474.7	109.04	14.9	1188.56	9	-2.1	595.284	90.75		489110	2	F2:26801	MSB60102A.raw	Q9NY97|B3GN2_HUMAN
SYLPFTEAF	9293.15	8.99	18595.8	23789	7013.17	59.87	29.22	1073.51	9	2.1	537.762	109.42		1102200	2	F2:33742	MSB60102A.raw	Q9NZV5|SELN_HUMAN
SYVQVTSNF	14402.5	12.23	18807.8	28661.1	12397.4	103.99	38.1	1043.49	9	-0.7	522.753	70.85		2058600	2	F2:20504	MSB60102A.raw	Q9UHB7|AFF4_HUMAN
RYFKTPRKF	28888	30.63	24218	28976.6	17697.3	149.27	21.26	1241.7	9	0.4	414.909	25.65		510840	2	F2:6909	MSB60102A.raw	Q9ULV3|CIZ1_HUMAN
NYSNIRFQF	19937.9	12.06	21913	23803.7	25830.4	71.9	33.69	1187.57	9	-1.2	594.793	81.04	0	3668100	2	F2:23611	MSB60102A.raw	Q9Y217|MTMR6_HUMAN
VFDPKVFTF	4546.36	46.99	19053	21981.9	6748.97	262.98	37.29	1098.58	9	0.4	550.295	98.51	20899000	22037000	1	F1:30020	MSB60101A.raw	Q9Y4K1|CRBG1_HUMAN
SYVRSLPFF	8427.58	7.88	25944.9	28619.6	14133.3	244.7	34.53	1114.58	9	1	558.298	96.7		4815200	2	F2:28955	MSB60102A.raw	Q9Y5R8|TPPC1_HUMAN
NWPSRPYLF	27875.1	25.71	31440.4	33087.7	11738.6	670.11	29.48	1178.59	9	-0.8	590.3	90.04	2721900	13076000	2	F2:26492	MSB60102A.raw	O43795|MYO1B_HUMAN
KYFSLPSVVF	13846.9	17.86	21328.9	25103.5	16496.3	673.52	39.85	1185.64	10	-1.2	593.828	106.85	5286400	1871000	2	F2:32589	MSB60102A.raw	O60656|UD19_HUMAN:Q9HAW9|UD18_HUMAN:Q9HAW8|UD110_HUMAN:Q9HAW7|UD17_HUMAN
VFTEVANLF	11253.9	33.11	29450.1	23763.8	15807.3	869.5	31.92	1038.54	9	-1.1	520.276	108.51		5007300	2	F2:33336	MSB60102A.raw	O75182|SIN3B_HUMAN
AWAPKPYHKF	27665.7	80.78	29459.4	36475.4	7536.46	9285	28.95	1243.65	10	-0.5	622.832	36.98		221300	2	F2:10214	MSB60102A.raw	O95819|M4K4_HUMAN:Q8N4C8|MINK1_HUMAN:Q9UKE5|TNIK_HUMAN
RWPKKSAEFLL	20252.5	232.76	5065.65	21205.1	11608.8	13684.7	43.34	1373.78	11	-0.4	458.934	65.31		5087000	2	F2:18826	MSB60102A.raw	P18621|RL17_HUMAN
RWPKKSAEF	25747.2	63.55	18935.4	39798.7	3873.81	1633.94	36.94	1147.61	9	0.5	574.814	25.1	1198900	3910600	2	F2:6663	MSB60102A.raw	P18621|RL17_HUMAN
FYPLDFTF	14730.5	116.03	31175.8	21970.2	13637.1	886.68	41.46	1048.49	8	0.9	525.253	113.97	20166000	27028000	2	F2:35489	MSB60102A.raw	P32119|PRDX2_HUMAN:Q06830|PRDX1_HUMAN:Q13162|PRDX4_HUMAN:P30048|PRDX3_HUMAN
DYLEWPEYF	21896.4	51.3	37942.6	25422.2	33758.5	1478.61	30.36	1260.53	9	1.4	631.275	113.42	535990	1001400	2	F2:35325	MSB60102A.raw	P32321|DCTD_HUMAN
YFLKGVLVF	7297.57	51.36	24042.6	23336.8	15877.4	1101	34.68	1084.63	9	-0.1	543.323	107.18		2163900	2	F2:32793	MSB60102A.raw	P49591|SYSC_HUMAN
VYPASPSSWLI	6187.49	27.57	4093.22	2225.58	7209.36	5540.06	22.03	1218.63	11	-1.2	610.321	109.08		2210800	2	F2:33622	MSB60102A.raw	P50416|CPT1A_HUMAN
EYIQFVPLL	5705.28	92.5	33401.4	21345.8	17925.3	681.37	28.54	1120.62	9	-0.8	561.315	113.32	1742500	5409200	2	F2:35255	MSB60102A.raw	P57678|GEMI4_HUMAN
VYAILTHGI	8513.09	20.3	25100	16565	14087.5	2405.26	25.28	985.56	9	-0.7	493.787	76.47		118540	2	F2:22184	MSB60102A.raw	P60891|PRPS1_HUMAN:P11908|PRPS2_HUMAN:P21108|PRPS3_HUMAN
LLPSRQFGF	3846.91	306.75	22219.5	26272.6	1565.02	3980.84	29.87	1063.58	9	-0.6	532.798	76.01		5028600	2	F2:22037	MSB60102A.raw	P62244|RS15A_HUMAN
VYIRGSKIRF	28768.6	26.39	16017.5	33493.3	28332.7	2368.28	36.12	1237.73	10	0.4	413.584	46.64	469920	4138700	2	F2:13086	MSB60102A.raw	P62318|SMD3_HUMAN
NYARGHYTI	14906.5	10.11	15793.8	15775.5	11645.5	597.92	27.08	1093.53	9	-0.4	547.772	28.82	512400	517130	1	F1:7778	MSB60101A.raw	P68363|TBA1B_HUMAN:Q9BQE3|TBA1C_HUMAN:Q71U36|TBA1A_HUMAN:P68366|TBA4A_HUMAN:P0DPH8|TBA3D_HUMAN:P0DPH7|TBA3C_HUMAN:Q6PEY2|TBA3E_HUMAN
PYRLIFEKF	40319.2	103.12	39822.8	38738.3	41851.8	10709	35.66	1211.67	9	0.2	404.897	80.88	795160	2627300	2	F2:23544	MSB60102A.raw	P78527|PRKDC_HUMAN
QYLKVEQLF	21464.6	13.34	36195.8	26868.9	35030.7	1937.55	20.38	1166.63	9	-1.6	584.323	89.99		917640	2	F2:26634	MSB60102A.raw	Q07912|ACK1_HUMAN
VAMKFIDNTLYF	6938	293.57	22327.8	18795	17456.9	4214.75	46.97	1460.74	12	-1.6	731.375	106.55	76156000	143660000	2	F2:32499	MSB60102A.raw	Q14116|IL18_HUMAN
IFGVIIDTF	17497	47.38	35979.9	28046	27832	6594.93	33.5	1023.56	9	1	512.79	112.52	0	2172300	1	F1:35435	MSB60101A.raw	Q14571|ITPR2_HUMAN:Q14573|ITPR3_HUMAN:Q14643|ITPR1_HUMAN
IYLEKLKTI	12545	30.49	32145.5	22585.3	12727	1204.77	16.38	1119.69	9	0.1	560.852	65.71		122640	2	F2:19026	MSB60102A.raw	Q15149|PLEC_HUMAN
KYGPVFSF	23025	33.72	31917.8	33009.8	28330.9	2712.17	29.15	943.48	8	-0.2	472.747	80.4	2300900	8409900	1	F1:23596	MSB60101A.raw	Q16850|CP51A_HUMAN
VLLPKLPQF	715.24	480.98	21481.3	18705.9	11597.3	3827.85	31.82	1053.66	9	0.2	527.837	101.64		1988600	2	F2:30659	MSB60102A.raw	Q53FV1|ORML2_HUMAN
DYAYLREHF	34695	291.87	32544.1	33307.2	33965.9	3306.36	25.95	1212.56	9	0.7	607.286	68.37		181660	2	F2:19814	MSB60102A.raw	Q86UK7|ZN598_HUMAN
SYNPLWLRI	12241.4	14.42	24375.5	14564.4	17495.5	647.76	28.23	1160.63	9	-0.1	581.324	102.96		2761900	2	F2:31026	MSB60102A.raw	Q8IZT6|ASPM_HUMAN
PFVDHVFTF	16882.7	42.98	35299.3	30960.7	28911.5	1556.29	40.68	1107.54	9	-0.5	554.777	97.11	8823800	15381000	2	F2:29119	MSB60102A.raw	Q8TDN6|BRX1_HUMAN
PYNPLWAQL	29303	104.49	31817.1	34143.8	27207.9	5154.83	22.17	1100.57	9	-8.3	551.285	107.25		7119500	2	F2:32740	MSB60102A.raw	Q8TF40|FNIP1_HUMAN:Q9P278|FNIP2_HUMAN
NYPETLGRLLI	22698.5	371.32	8656.12	9689.59	18857.7	8763.36	38.55	1287.72	11	0.2	644.867	101.2		2599800	2	F2:30506	MSB60102A.raw	Q92503|S14L1_HUMAN:O43304|S14L5_HUMAN
EYIKFLRSI	8142.1	79.65	25855.5	17943.7	22259.7	1536.51	37.17	1167.67	9	0.5	584.84	77.47	2102800	6425700	2	F2:22501	MSB60102A.raw	Q92769|HDAC2_HUMAN
AFMKGVFTF	3584.45	10.47	18773	25415.4	19775.3	1802.65	28.84	1046.53	9	-1.2	524.27	97.06	2579500	3198800	1	F1:29474	MSB60101A.raw	Q96I45|TM141_HUMAN
NFLPPIIARF	3485.67	158.97	26148.7	28243.3	7085.17	2156.22	36.63	1186.69	10	0.6	594.351	108.61	4356500	3599700	2	F2:33389	MSB60102A.raw	Q96PD2|DCBD2_HUMAN
DYSSILQKF	33205.3	68.2	37295.5	31338.8	34715.7	1677.27	33.65	1099.55	9	-1.4	550.784	94.66	1387800	5320100	1	F1:28659	MSB60101A.raw	Q96RU3|FNBP1_HUMAN
IYGLLKNPF	30410.9	41.18	24873.2	34154.9	23265.2	1748.74	39.23	1063.61	9	0.4	532.811	92.74	2162100	3026700	2	F2:27480	MSB60102A.raw	Q96TA2|YMEL1_HUMAN
VYAPPVGGFSF	20529.4	19.67	7478.78	25134.5	6241.28	1134.97	22.76	1139.57	11	0.6	570.79	105.14		8881900	2	F2:31915	MSB60102A.raw	Q99436|PSB7_HUMAN
PYTKVEESF	39386.6	171.04	41038.8	39941.9	41999.2	13206	30.68	1098.52	9	1.5	550.27	47.46	386800	1157900	2	F2:13461	MSB60102A.raw	Q9BV10|ALG12_HUMAN
KYISKPENL	20253	139.82	30032.5	36176.7	11949.3	779.45	24.92	1090.6	9	-1.1	546.308	29.27	407750	591980	1	F1:7910	MSB60101A.raw	Q9H9S4|CB39L_HUMAN:Q9Y376|CAB39_HUMAN
VFRLQFDEF	28428.5	266.18	22014.5	31053.9	18252.9	1945.16	32.52	1199.6	9	0.6	600.806	104.41		1521400	2	F2:31572	MSB60102A.raw	Q9UKB1|FBW1B_HUMAN:Q9Y297|FBW1A_HUMAN
IYFPKKEAVTF	28040.9	48.73	6043.71	23659.6	19193.3	1444.15	25.07	1341.73	11	-3.4	671.872	68.95		303100	2	F2:19911	MSB60102A.raw	Q9Y263|PLAP_HUMAN
IYVPEAQTRL	9899.3	253.95	25340.4	31467.2	840.33	1484.38	40.14	1188.65	10	-0.7	595.332	62.91	15487000	14365000	1	F1:18242	MSB60101A.raw	Q9Y2H0|DLGP4_HUMAN
LPHPIIVSI	9211.26	22814.2	112.05	151.28	16253.8	11649.8	27.64	987.612	9	2.7	494.815	83.27	1435300	1525200	1	F1:24561	MSB60101A.raw	O95759|TBCD8_HUMAN
APRPARPPP	37722.4	44212.7	40.98	17488.8	38011.7	35865.3	19.21	957.551	9	-0.3	479.783	12.29	0	145400	1	F1:2894	MSB60101A.raw	A6NGR9|MROH6_HUMAN
APKRPPSAF	36423.3	31993.2	11.3	22941.7	21342.5	14180.8	29.07	969.54	9	0.5	485.777	19.92	0	1785200	2	F2:5119	MSB60102A.raw	B2RPK0|HGB1A_HUMAN:P09429|HMGB1_HUMAN:P26583|HMGB2_HUMAN
RPKDPNNLL	26816.6	30141	13.6	7940.69	11001.3	11504.5	28.8	1065.59	9	-0.6	533.803	27.59		1159200	2	F2:7526	MSB60102A.raw	O00232|PSD12_HUMAN
QPYGGFLDI	9679.63	23575.8	213.93	561.7	22653.1	21106.7	13.73	1008.49	9	-2.7	505.252	106.3		6379100	2	F2:32381	MSB60102A.raw	O14976|GAK_HUMAN
MPKLATQSNEI	9183.1	31788.9	245.59	2951.44	26623.2	30918.8	13.46	1230.63	11	1.3	411.217	65.08		122730	2	F2:18794	MSB60102A.raw	P04792|HSPB1_HUMAN
SARPKLKAF	23068.9	25849.7	276.08	30612.6	8014.93	2162.44	28.93	1016.61	9	0.7	509.314	22.15	272570	142340	1	F1:5844	MSB60101A.raw	P09211|GSTP1_HUMAN
RPRKAFLL	29643.8	12412	10.17	10348.1	14653.4	11975.3	25.14	999.634	8	0.8	500.825	34.3	1949000	2651300	1	F1:9456	MSB60101A.raw	P13667|PDIA4_HUMAN
GPRPSPWARL	24735.5	27580.8	15.71	14963.9	18682.3	12116.1	19.01	1135.62	10	-0.4	379.549	51.69		360020	2	F2:14600	MSB60102A.raw	P16144|ITB4_HUMAN
IPLPLGTVTI	1995.81	7824.53	396.21	503.39	1465.74	20281.2	33.72	1022.64	10	-1.7	512.325	108.86	1565800	3583500	2	F2:33495	MSB60102A.raw	P50993|AT1A2_HUMAN:P05023|AT1A1_HUMAN
APRAPRALAAA	13630.9	41564.4	21.38	21255.9	23864.8	31321.2	22.44	1063.62	11	0	532.82	23.66		352270	2	F2:6267	MSB60102A.raw	P53007|TXTP_HUMAN
YPFKPPKVAF	23107.6	3105.28	44.86	3928.21	15279.3	1566.81	38.42	1192.66	10	0.4	398.562	74.7		1810600	2	F2:21630	MSB60102A.raw	P61077|UB2D3_HUMAN:P62837|UB2D2_HUMAN:Q9Y2X8|UB2D4_HUMAN
RPDGEKKAYVRL	29226.6	31472.4	354.98	21586.8	35334.5	33216.8	31.35	1430.8	12	2	477.941	19.74		37410	2	F2:5142	MSB60102A.raw	P62750|RL23A_HUMAN
APRPPPKPM	33165.5	43078.5	5.15	20233.9	15637.9	15312.1	26.52	989.548	9	-0.2	495.781	16.12		2275600	2	F2:4072	MSB60102A.raw	P62854|RS26_HUMAN:Q5JNZ5|RS26L_HUMAN
AGPNTNGSQF	31487.3	20469.1	389.2	28299.3	6165.64	21144.6	38.74	991.436	10	-0.6	496.725	28.21	8838600	2512400	1	F1:7623	MSB60101A.raw	P62937|PPIA_HUMAN:F5H284|PAL4D_HUMAN:A0A075B759|PAL4E_HUMAN:Q9Y536|PAL4A_HUMAN:P0DN26|PAL4F_HUMAN:P0DN37|PAL4G_HUMAN:A0A0B4J2A2|PAL4C_HUMAN:P30405|PPIF_HUMAN
LPQGIVREL	19385.9	32933.4	36.18	2747.52	16356.6	9871.17	25.47	1023.61	9	-2.6	512.81	70.46		418620	2	F2:20452	MSB60102A.raw	P63272|SPT4H_HUMAN
RPTDKPLRL	28587.4	31859.9	68.91	7556.38	17932.6	13843	14.8	1094.66	9	0.5	548.336	22.61		108550	2	F2:5939	MSB60102A.raw	P68104|EF1A1_HUMAN:Q5VTE0|EF1A3_HUMAN:Q05639|EF1A2_HUMAN
KVSLPKLANVQL	7117.21	32007	409.57	28516.9	22022.6	31427.4	44.51	1308.81	12	-0.1	437.278	79.55	4081800	1727700	1	F1:23324	MSB60101A.raw	P68402|PA1B2_HUMAN
QPRRPRNLAA	39580.1	42433.2	22.77	18770.8	37601.8	22051.2	17.46	1177.68	10	-1	589.846	12.91		219020	2	F2:3084	MSB60102A.raw	Q00325|MPCP_HUMAN
YTRVLGMTL	1638.58	12445.6	148.79	13481.8	1955.79	3338.17	35.49	1052.57	9	1.3	527.292	82.45	0	4587700	2	F2:23933	MSB60102A.raw	Q04760|LGUL_HUMAN
LPRGSIPRSL	28937.2	36068.4	6.64	8150.03	19913.5	8498.54	22.79	1094.66	10	-0.5	548.335	46.16		289530	2	F2:12951	MSB60102A.raw	Q14566|MCM6_HUMAN
RPKPSSSPVIF	37075	26982.8	17.77	16603.6	25680.5	25930.3	18.84	1213.68	11	2.1	607.85	43.28		175450	2	F2:12111	MSB60102A.raw	Q15366|PCBP2_HUMAN
GPRLPWTRL	30314.6	35288.3	8.89	15196.5	24897.1	26026.8	23.07	1094.63	9	0.6	548.325	71.38		375030	2	F2:20663	MSB60102A.raw	Q6NUQ4|TM214_HUMAN
KPSEERVREI	30276.9	38183.2	188.77	9306.53	26071.6	31970.3	28.97	1241.67	10	1.6	621.845	16.24		87933	2	F2:4088	MSB60102A.raw	Q7LG56|RIR2B_HUMAN:P31350|RIR2_HUMAN
APRLPITGL	24201.5	39572.8	5.69	13985.4	16601.8	21520.1	25.49	936.576	9	-1.1	469.295	76.37		1035900	2	F2:22226	MSB60102A.raw	Q8TF50|ZN526_HUMAN
APHEILIQI	9954.4	31028.4	461.38	1234.8	30953.3	23571.2	35.87	1032.6	9	-0.5	517.305	79.52		11787000	2	F2:23163	MSB60102A.raw	Q92503|S14L1_HUMAN
IPRAALLPLL	8627.04	20012	5.39	2427.57	16443.4	5577.59	18.41	1075.71	10	0.1	538.863	104.78		2470400	2	F2:31731	MSB60102A.raw	Q92743|HTRA1_HUMAN
RPRPGRPTA	32447.1	39925.5	5.03	8138.93	24944.9	20076.2	13.32	1006.58	9	0.8	336.534	10.91		519890	2	F2:2473	MSB60102A.raw	Q9BRG2|SH23A_HUMAN
RPRLTSNEKL	26619.1	32815.3	3.38	12131.4	23087.4	17126.5	18.72	1212.69	10	1.3	607.355	19.99		654220	2	F2:5169	MSB60102A.raw	Q9Y296|TPPC4_HUMAN
LPSALALSLL	2313.28	18289.3	67.44	975.77	14872.5	23272.2	15.58	996.622	10	-0.5	499.318	112.15		2606600	2	F2:34832	MSB60102A.raw	Q9Y639|NPTN_HUMAN
LPHVPLGVI	21923.4	30712.8	43.18	514.85	18644.5	20219.5	20.35	943.585	9	-1.1	472.8	87.39		1930900	2	F2:25645	MSB60102A.raw	Q9Y679|AUP1_HUMAN
LPSSVLHII	8017.1	16064.9	210.2	127.78	22566.2	16571.4	24.76	977.591	9	-0.4	489.803	87.63		1666300	2	F2:25803	MSB60102A.raw	Q9NSG2|CA112_HUMAN
IPFEFPLHL	4297.22	15339.3	578.09	250.52	7912.99	4125.9	22.03	1111.61	9	-0.5	556.81	109.73		1495500	2	F2:33890	MSB60102A.raw	O14972|VP26C_HUMAN
LPWISILTV	4487.86	27034.5	674.19	110.73	24800.1	24299.9	20.17	1040.63	9	-3.4	521.319	115.92		1184900	2	F2:36319	MSB60102A.raw	O75845|SC5D_HUMAN
VPVARVWLV	2784.75	15091.9	1004.19	348.06	25260.7	14175.7	35.91	1037.64	9	0.2	519.827	87.63	66551000	111990000	2	F2:25748	MSB60102A.raw	P08833|IBP1_HUMAN
FPFESGKPFKI	13172.3	24872.4	1015.17	367.7	28638.8	23387.8	30.1	1295.69	11	2.4	648.855	81.04		575100	2	F2:23671	MSB60102A.raw	P17931|LEG3_HUMAN
LPSELIVHI	6742.4	25723.3	1695.5	198.39	28629.5	21447.6	30.15	1019.6	9	-0.1	510.808	88.74		2580600	2	F2:26100	MSB60102A.raw	Q7Z6M2|FBX33_HUMAN
LPFEPVPVI	10947.1	26803.5	711.04	231.35	13138.6	15494.6	27.23	1009.58	9	-0.2	505.8	108.96		7758800	2	F2:33542	MSB60102A.raw	Q9P2J5|SYLC_HUMAN
VMAPRTLLL	205.86	297.7	2079.92	9560.66	169.5	232.91	22.62	1012.61	9	1.2	507.313	76.32		146120	2	F2:22171	MSB60102A.raw	P04439|HLAA_HUMAN
KIPVSAFLL	395.07	580.74	16646.2	24515.4	202.77	5536.34	24.81	986.616	9	-0.3	494.315	97.28	1779100	481840	1	F1:29582	MSB60101A.raw	O95994|AGR2_HUMAN
VLPKLYVKL	367.91	732.25	24122.8	26624	194.69	3470.57	37.67	1071.71	9	-0.8	358.242	75.24	6315000	15334000	2	F2:21811	MSB60102A.raw	P62854|RS26_HUMAN:Q5JNZ5|RS26L_HUMAN
NIPTWLTEL	164.82	10646.8	13762.5	27819.7	134.51	2266.35	32.2	1085.58	9	0.8	543.795	111.79	1412200	2984300	1	F1:35182	MSB60101A.raw	Q14669|TRIPC_HUMAN
ISPFVGRIL	13378.1	11743.7	14496.6	28672.9	63.11	3761.26	30.19	1000.61	9	0.1	501.311	85.3	5972100	6186400	1	F1:25249	MSB60101A.raw	P37837|TALDO_HUMAN
YGLLPSHASYL	1208.14	12808.6	15619.3	25568.2	112.92	3598.99	33.31	1219.62	11	-2.7	610.817	81.98		4688600	2	F2:23951	MSB60102A.raw	Q86U90|YRDC_HUMAN
QMEPAAFQAL	1107.18	6691.03	11157.1	26855.8	351.68	12048.6	18.45	1104.53	10	-3	553.269	87.63		1890700	2	F2:25814	MSB60102A.raw	Q8NFU3|TSTD1_HUMAN
LYPEGLAQL	5641.01	211.05	22803.8	33310.8	297.98	180.04	28.4	1002.54	9	0.2	502.277	92.78	0	39362000	2	F2:27636	MSB60102A.raw	P61421|VA0D1_HUMAN
YYPNPPLVL	14149.5	168.59	15153.9	31232.9	167.94	20.64	27.46	1074.58	9	0.4	538.295	98.74	0	8133100	1	F1:30096	MSB60101A.raw	Q5TFE4|NT5D1_HUMAN
KYFDEHYEY	16518.3	462.14	37809.4	30052.4	27388.4	73.79	34.75	1292.53	9	1.6	647.276	49.59		210850	2	F2:14052	MSB60102A.raw	P33552|CKS2_HUMAN
EYFSYPVSL	11231.1	279.29	24575.2	18681.5	7604.77	133.33	34.79	1103.52	9	-0.2	552.766	105.11	13104000	30443000	2	F2:31834	MSB60102A.raw	P37088|SCNNA_HUMAN
FYHKYFNYL	2747.37	38.91	19892.9	18981.6	2408.96	19.32	43.78	1293.62	9	-0.9	647.816	74.3		1486600	2	F2:21536	MSB60102A.raw	Q93063|EXT2_HUMAN
KRGDVIYIL	6875.6	12063.4	28464.8	28011.1	31778.2	287.98	21.58	1075.64	9	-0.7	538.826	68.5	2133200	2026800	1	F1:19917	MSB60101A.raw	O75563|SKAP2_HUMAN
QRQDIAFAY	24875.3	27232.1	36317.1	34931.2	43479.8	195.86	37.76	1110.55	9	0.4	556.28	59.41	748960	1199300	1	F1:17094	MSB60101A.raw	P07355|ANXA2_HUMAN
FFYGKSLLEL	1053.58	548.71	15556.7	18910	4512.3	299.66	36.67	1215.65	10	-1.2	608.833	105.88	9138600	3540400	2	F2:32204	MSB60102A.raw	P49321|NASP_HUMAN
QYNTYPIKL	26124.9	526.91	32192.9	30454.7	18049.4	411.96	14.2	1138.6	9	0.8	570.309	70.97		356570	2	F2:20554	MSB60102A.raw	P61619|S61A1_HUMAN
VYTSVQAQY	31091.9	2774.47	37697.5	34772.4	32577.2	275.36	34.03	1057.51	9	-2.2	529.76	45.74	161980	420010	2	F2:12929	MSB60102A.raw	Q6ZSR9|YJ005_HUMAN
VYPQYVIEY	26319.3	657.68	36507	38450.5	10519.9	65.71	23.51	1172.58	9	-4.4	587.292	89.31	3978300	5478800	2	F2:26187	MSB60102A.raw	Q7Z2W4|ZCCHV_HUMAN
LYDPVISKL	4128.72	561.24	18033	20798.6	5633.02	171.16	30.9	1046.6	9	1.1	524.308	80.99	2697600	2929800	2	F2:23592	MSB60102A.raw	Q96EZ8|MCRS1_HUMAN
VYPEYVIQY	22251.1	529.83	37868.8	37587.2	10847.1	69.02	26.07	1172.58	9	-4.4	587.292	89.31	3978300	6481500	2	F2:26342	MSB60102A.raw	Q9H0J9|PAR12_HUMAN
LIPKFLTEV	6.83	12788.5	21420	13903.5	275.67	5614.28	33.24	1058.64	9	-1.5	530.325	101.19	0	478870	2	F2:27946	MSB66429A.raw	Q9ULK4|MED23_HUMAN
ALLDKLYAL	4.61	9070.62	8040.29	24522.3	3933.57	2054.38	30.02	1018.61	9	0.8	510.311	104.65		736280	2	F2:29210	MSB66429A.raw	Q9NV31|IMP3_HUMAN
EIVEKILSV	81.34	32657	19648	14140.3	20127.8	14610.2	17.18	1028.61	9	2.8	515.315	87.68		73039	2	F2:24268	MSB66429A.raw	Q14651|PLSI_HUMAN
EMFSDIYKI	184.53	5771.9	33254.6	4532.61	25049.8	13323.7	41.67	1144.55	9	-0.6	573.281	97.76		787420	2	F2:26939	MSB66429A.raw	P13693|TCTP_HUMAN:Q9HAU6|TCTP8_HUMAN
FITGVGILAL	99.51	28023.9	7329.22	19881.9	10152.6	15511.9	36.5	1002.61	10	-1	502.312	111.83	10744000	1436200	1	F1:33251	MSB66428A.raw	Q9NYL9|TMOD3_HUMAN
KMGLIFEV	60.01	19180	35008.4	21188.8	35739	27526.8	19	935.515	8	-0.8	468.764	99.98		82472	2	F2:27611	MSB66429A.raw	Q15363|TMED2_HUMAN
LSQLYVMSLL	173.23	14324.2	15816.6	15384.8	15521.4	20111	15.47	1165.64	10	-9.7	583.822	72.64		332190	2	F2:20107	MSB66429A.raw	P23945|FSHR_HUMAN
MIIKLITSV	4.57	21084.5	6467.24	4015.45	11143.5	11792.1	32.56	1016.63	9	0.8	509.323	99.9		111130	2	F2:27593	MSB66429A.raw	P06737|PYGL_HUMAN
NQFDVVIRL	23.99	16395.9	28982.9	10903.4	15344.9	1245.84	41	1102.61	9	-1	552.313	98.42		720090	3	F3:27197	MSB66430A.raw	Q9UNP4|SIAT9_HUMAN
RFQSSAVMAL	108.44	1117	3309.65	24447.9	7273.76	3341.53	15.83	1108.57	10	-0.5	555.292	67.81		96274	2	F2:18735	MSB66429A.raw	P68431|H31_HUMAN:Q71DI3|H32_HUMAN:Q16695|H31T_HUMAN:Q5TEC6|H3PS2_HUMAN
SLEPVLLPLV	60.09	16557.8	24490.8	20475	11356.1	22311.8	20.41	1078.66	10	-1.5	540.338	114.42		1545900	2	F2:33217	MSB66429A.raw	Q8IYM0|F186B_HUMAN
VIAEILRGV	7.91	29785.6	17290.3	14179.1	12534.7	14158.5	39.58	968.602	9	-0.3	485.308	86.6	0	367700	2	F2:23980	MSB66429A.raw	O00567|NOP56_HUMAN
VTAKVFFDV	29.3	8167.42	26507.6	11451.1	18088.7	20554.5	16.76	1024.56	9	5.6	513.29	90.02		655620	2	F2:24781	MSB66429A.raw	P45877|PPIC_HUMAN
YTIGKEIIDL	184.37	24880.2	22494.1	28610	11730.8	14851.9	38.91	1163.64	10	-0.2	582.829	94.66	0	380410	1	F1:26518	MSB66428A.raw	Q71U36|TBA1A_HUMAN:P68363|TBA1B_HUMAN:Q9BQE3|TBA1C_HUMAN
YTQMNAELNYKV	219.91	22137.7	32658.4	21138.2	29054.2	26874.1	52.01	1472.7	12	-2.8	737.354	66.78		133220	2	F2:18449	MSB66429A.raw	Q9NZD2|GLTP_HUMAN
AYIDYLSHL	874.87	63.5	22755	26816.9	4121.09	74.02	29.39	1093.54	9	-1.7	547.779	100.74		282490	2	F2:27836	MSB66429A.raw	Q12996|CSTF3_HUMAN
LYQDGVFKF	14368.7	9.7	32074.3	25782.4	23983.9	185.81	40.05	1115.57	9	-0.7	558.789	87.95		2095100	4	F4:24105	MSB66431A.raw	Q9H8T0|AKTIP_HUMAN
SYYGGNWASF	8732.69	7.45	14931.7	24693.5	12848.7	169.18	28.99	1150.47	10	0.3	576.243	100.35		705720	2	F2:27693	MSB66429A.raw	P24386|RAE1_HUMAN:P26374|RAE2_HUMAN
TYKDYVDLF	25701	16.98	35161	30746.7	23108.9	93.21	39.41	1162.55	9	-0.8	582.284	94.5		1041000	4	F4:25863	MSB66431A.raw	P78527|PRKDC_HUMAN
VYSRTFTWL	12124.1	34.67	19750	26158.9	6777.95	275.05	20.15	1171.6	9	0.6	586.809	96.57		498810	2	F2:26656	MSB66429A.raw	O00159|MYO1C_HUMAN
LYIVEPLKF	27378.6	17.65	37360.5	27018.1	26537.5	661.16	35.65	1120.65	9	-2.6	561.332	105.25	0	2535200	3	F3:29427	MSB66430A.raw	Q9UBS9|SUCO_HUMAN
NYGRVFSEW	31911.6	20.08	30366.8	26295.4	33133.2	4590.26	39.69	1156.53	9	-0.7	579.272	82.16		193030	4	F4:22586	MSB66431A.raw	O95219|SNX4_HUMAN
NYLHLDYNF	14796.6	8.54	32878.9	22829.3	33206.1	1169.61	30.77	1197.55	9	-3.1	599.778	97.07		357700	2	F2:26792	MSB66429A.raw	Q6P2Q9|PRP8_HUMAN
QYLQDAYSF	17339	18.03	30492.9	28930.3	29605.1	1390.22	32.87	1133.5	9	0.1	567.759	88.84	516750	1144400	2	F2:24536	MSB66429A.raw	Q15021|CND1_HUMAN
TYLPAGQSVLL	2964.76	183.83	2143.75	16529.2	2521.69	3127.03	28.98	1160.64	11	-1	581.329	100.6		702750	2	F2:27828	MSB66429A.raw	P35232|PHB_HUMAN
VSYGMNPVDLF	13965	219.05	28744.3	24942.2	21865.6	13275.5	41.92	1240.58	11	-0.7	621.297	109.89	6525200	2100800	3	F3:31248	MSB66430A.raw	Q99439|CNN2_HUMAN
VYTSKSDVWSF	18600.8	56	34335.8	33850.3	32208.2	4531.58	50.56	1317.62	11	-0.9	659.819	81.49		180110	4	F4:22409	MSB66431A.raw	P30530|UFO_HUMAN
GLPAVPAVPL	950.3	22283.8	91.5	12167.3	1670.46	21268.8	16.82	932.569	10	4.5	467.294	74.06		13877000	2	F2:20523	MSB66429A.raw	Q8N446|ZN843_HUMAN
GPKGVGAIYI	28056	39164.3	464.11	9459.31	39445.4	35421	15.25	973.56	10	7.9	487.791	86.8		3380300	2	F2:24059	MSB66429A.raw	Q9Y697|NFS1_HUMAN
AYPEYLITY	18941	464.87	36564.3	39108	11295	112.87	38.33	1131.55	9	-1.3	566.781	100.96		212410	3	F3:27885	MSB66430A.raw	O95271|TNKS1_HUMAN:Q9H2K2|TNKS2_HUMAN
NYRPLPSLEL	24197.3	1347.22	10096.6	30824.3	4998.63	441.24	25.08	1200.65	10	-1.9	601.331	92.21		53445	2	F2:25447	MSB66429A.raw	Q14241|ELOA1_HUMAN
RLYPEGLAQL	44.55	390.27	3448.23	22239.8	403.87	2135.7	36.04	1158.64	10	0.5	580.327	82.38		621540	4	F4:22635	MSB66431A.raw	P61421|VA0D1_HUMAN
YTIDSDWRF	121.8	435.43	26247.6	13450.1	12218.8	1635.99	37.88	1201.54	9	-0.8	601.777	93.34	395680	556350	4	F4:25545	MSB66431A.raw	P78527|PRKDC_HUMAN
FIFSDTHEL	4.17	8807.47	5151.21	6308.08	459.19	245.39	24.03	1107.52	9	-1	554.769	83.85		554370	4	F4:23033	MSB66431A.raw	Q9UKK3|PARP4_HUMAN
RAIDFSPYL	11.85	7538.98	3446.36	5057.65	401.36	373.31	26.85	1080.56	9	0.3	541.288	90.11		1043800	4	F4:24622	MSB66431A.raw	P17676|CEBPB_HUMAN
YAFPKSITV	7.51	10939.1	6319.22	670.55	282.46	222.55	24.45	1024.56	9	1.4	513.288	78.75		416100	4	F4:21680	MSB66431A.raw	P53985|MOT1_HUMAN
FAMEIDPSL	6.57	14415.3	2014.71	2032.82	368.18	547.11	19.22	1021.48	9	-1.5	511.746	104.52		558960	4	F4:29272	MSB66431A.raw	O43681|GET3_HUMAN
FIPPDGNFRL	217.4	12152.9	7470.86	12681	277.79	7191.13	18.24	1174.61	10	-1.5	588.313	87.09		906800	4	F4:23853	MSB66431A.raw	P53677|AP3M2_HUMAN
HLPEELAEL	31.86	12006.5	17801.2	30292.6	58.79	1811.98	29.53	1049.54	9	1.3	525.778	81.88		63688	4	F4:22511	MSB66431A.raw	Q96II8|LRCH3_HUMAN
MLPSILNQL	22.31	2021.61	14780.6	16622.1	57.34	1087.14	33.18	1027.57	9	-0.3	514.794	109.4	1331400	1408000	3	F3:31092	MSB66430A.raw	P20290|BTF3_HUMAN
FQNPFRSEL	46.18	12203.9	2392.83	13772.8	865.57	131.28	22	1136.56	9	-2.4	569.287	84.44		513490	4	F4:23127	MSB66431A.raw	P18887|XRCC1_HUMAN
KQFDKILEL	4.99	4581.08	17454.1	15766.9	3310.4	304.87	16.91	1132.65	9	-0.1	567.332	73.83		79960	4	F4:20349	MSB66431A.raw	P47895|AL1A3_HUMAN
AAIEIFEKV	10.12	20061.7	25185.2	4561.69	14532	11971.3	28.6	1018.57	9	-3.6	510.29	84.7		164900	4	F4:23267	MSB66431A.raw	Q86UW6|N4BP2_HUMAN
AILELDEHL	130.09	30454.7	26878.4	27763.1	18401.2	26405.1	32.77	1051.55	9	-1.8	526.784	86.41	0	259530	3	F3:23866	MSB66430A.raw	P60510|PP4C_HUMAN
ALPEDLVEV	5.08	19630.8	31360.5	29164.4	726.04	6437.5	31.38	983.518	9	-0.3	492.766	96.91		2626300	4	F4:26521	MSB66431A.raw	P13797|PLST_HUMAN:P13796|PLSL_HUMAN
AQQVILVQV	23.62	22561.1	36078.6	21360.8	35737.4	26560.4	19.51	996.597	9	0.2	499.306	84.78		332350	4	F4:23308	MSB66431A.raw	Q53EP0|FND3B_HUMAN
ATYVFLHTV	6.26	12887.3	24675.9	7934.34	9485.45	12331.5	18.63	1049.55	9	-1.7	525.784	79.25		521720	4	F4:21758	MSB66431A.raw	Q53FV1|ORML2_HUMAN
AVWKESFQV	9.46	17909.2	19267.1	9905.94	25070.7	21978.1	25.15	1092.56	9	2.3	547.289	75.14		145560	4	F4:20691	MSB66431A.raw	Q8NB91|FANCB_HUMAN
EQIKDIFYI	12.81	5240.99	30739.7	6676.71	32616.4	15640.6	32.26	1167.62	9	-2.9	584.814	103.77	0	1655200	3	F3:28836	MSB66430A.raw	Q9H814|PHAX_HUMAN
EQIKFFEEV	21	13021.7	29945.6	8453.33	26966.1	13437.6	35.35	1167.58	9	-1	584.797	88.98	185580	1087100	4	F4:24398	MSB66431A.raw	O75663|TIPRL_HUMAN
EVVERLLSV	48.06	29549.7	12690.2	11434.8	17482.8	11668.8	31.6	1042.6	9	-0.1	522.308	81.41		761450	4	F4:22344	MSB66431A.raw	Q27J81|INF2_HUMAN
FCMYHYFVDI	367.15	19235.9	28493.8	8248.15	18136.9	19173.1	17.02	1336.56	10	-2.3	669.287	84.4		9404600	4	F4:23222	MSB66431A.raw	Q8WWY8|LIPH_HUMAN
FGLARAFGV	51.6	19758.4	23168.4	4398.88	17148.4	13043.1	40.11	936.518	9	-0.5	469.266	91.12	382280	2350300	2	F2:25172	MSB66429A.raw	P24941|CDK2_HUMAN:Q00526|CDK3_HUMAN
FGTNVMVTV	55.7	23191.2	23218.6	3841	13195.6	7364.52	21.88	966.484	9	-0.8	484.249	85.39		943440	4	F4:23419	MSB66431A.raw	Q8TCT9|HM13_HUMAN
FIVHTIEEI	12.13	19188.7	21171.2	8895.38	8920.44	9585.63	24.58	1099.59	9	-0.1	550.803	85.22	994510	713410	3	F3:23508	MSB66430A.raw	P12814|ACTN1_HUMAN:O43707|ACTN4_HUMAN
FLKQILNGV	15.88	31421	21387.1	14134.8	21651.2	12666.2	17.06	1030.62	9	1.3	516.317	85.8		289400	4	F4:23555	MSB66431A.raw	P53355|DAPK1_HUMAN
FQDPLPWSV	3.12	9027.25	21999.9	4953.51	8213.33	1138.26	28.39	1087.53	9	-1.4	544.773	109.18	7096400	7455700	4	F4:31100	MSB66431A.raw	Q9NP91|S6A20_HUMAN
FQEEDFPAL	8.82	16549.9	14597.7	17264.2	4534.62	1876.59	33.04	1094.49	9	-1	548.253	98.28		6646700	4	F4:27100	MSB66431A.raw	Q86UK7|ZN598_HUMAN
FVWSGTAEA	7.38	30888	6152.91	6937.85	10183.6	7013.32	31.9	966.445	9	-1.4	484.229	76.74		562660	1	F1:21233	MSB66428A.raw	Q9UPT9|UBP22_HUMAN
GGLDRYFQV	437.7	19709.7	33767.6	16665.1	29967.3	19857	23.27	1053.52	9	-1.3	527.769	83.6		494420	4	F4:23004	MSB66431A.raw	Q6PI48|SYDM_HUMAN
GQWGRAWEV	2.68	6962.36	25500.2	7761.21	24401.6	5164.77	39.61	1087.52	9	-1.6	544.766	74.56		297040	4	F4:20534	MSB66431A.raw	Q9UBM7|DHCR7_HUMAN
GVIGGGVFQAI	456.6	33189.5	24423.6	30689.5	35214.3	37138	36.05	1016.57	11	-0.5	509.29	106.3	1353200	3536200	4	F4:29984	MSB66431A.raw	O60830|TI17B_HUMAN
GVVEKLSVL	309.39	31286.3	5269.25	31757.6	6844.57	10171.8	20.78	942.575	9	-0.2	472.295	73.88		31040	4	F4:20364	MSB66431A.raw	Q7L5Y9|MAEA_HUMAN
HIIENIVAV	4.29	25000.3	9774.14	9063.75	5185.26	3544.04	37.14	1006.58	9	-0.2	504.298	72.37		5351200	4	F4:19937	MSB66431A.raw	O76021|RL1D1_HUMAN
HQLENLSNFI	43.56	14358	26955	11310.6	26695.9	21608.3	34.91	1213.61	10	0.5	607.812	90.68		859310	4	F4:24887	MSB66431A.raw	Q99439|CNN2_HUMAN
HVLDTLIQL	21.32	22607.5	10997.9	14313.6	10901.4	4933.08	27.71	1050.61	9	-3.5	526.309	100.28		437760	4	F4:27637	MSB66431A.raw	Q7Z6Z7|HUWE1_HUMAN
IQDPVIFYV	2.81	8214.93	30797.6	6935.9	10364.1	2626.88	16.91	1092.59	9	-3	547.298	109.47		346900	4	F4:31195	MSB66431A.raw	Q86SQ4|AGRG6_HUMAN
IVLKGVVQV	16.85	22640.8	22959.6	10510.5	17257.1	16567.3	25.86	953.627	9	0.4	477.821	68.83		482270	4	F4:18909	MSB66431A.raw	Q13823|NOG2_HUMAN
KIIGIMEEV	3.35	19743.8	19775.1	14891	16255.3	12788.8	37.88	1030.57	9	-0.1	516.294	80.73		42765	4	F4:22210	MSB66431A.raw	P52701|MSH6_HUMAN
KILDYEVTL	27.13	17305.9	15633.8	20067.8	5881.28	8026.91	36.85	1092.61	9	-0.1	547.311	87.28		783430	4	F4:23908	MSB66431A.raw	P40189|IL6RB_HUMAN
KIVDFSYSV	2.54	12257.5	11235.1	8371.87	6754.16	5542.16	37.5	1056.55	9	-0.4	529.282	75.38		108300	4	F4:20771	MSB66431A.raw	O60566|BUB1B_HUMAN
KLDEAFEFV	4.29	13941.8	30881	21017.3	9782.29	11032	27.16	1096.54	9	-0.8	549.279	92.12		1232800	4	F4:25265	MSB66431A.raw	P28562|DUS1_HUMAN
KMIEDLQNEL	21.19	15146.8	20042	28067	10500.3	13835.7	23.16	1231.61	10	-2.9	616.811	74.29		39232	4	F4:20463	MSB66431A.raw	Q8IY18|SMC5_HUMAN
LQEETTVSL	179.12	24040.2	12612.5	21941.2	6495.22	7380.31	21.13	1018.52	9	-1	510.266	63.62	471900	480750	3	F3:17556	MSB66430A.raw	Q2TAY7|SMU1_HUMAN
LQLDPAQIYRV	56.99	24914.7	38703.1	21692.9	32071.2	29908	29.73	1314.73	11	-0.9	658.371	91.85		740370	4	F4:25158	MSB66431A.raw	P31941|ABC3A_HUMAN:Q9UH17|ABC3B_HUMAN
LTIEDGIFEV	5.92	26376.3	30464.9	14014.2	25370.3	24097	48.44	1134.58	10	-0.5	568.297	109.55	3320400	2003400	3	F3:31116	MSB66430A.raw	P11142|HSP7C_HUMAN:P54652|HSP72_HUMAN
NAVVELVTV	193.14	32816	23500.2	5199.08	18162.8	15278.6	30.32	942.539	9	-1.7	472.276	92.77		2101000	4	F4:25447	MSB66431A.raw	O75787|RENR_HUMAN
NLLQVLEKV	30.31	27039.2	35197.5	12954.4	32457.6	23345.6	24.2	1054.64	9	-0.5	528.326	108.78		2383500	4	F4:30956	MSB66431A.raw	Q6KB66|K2C80_HUMAN:#CONTAM#IPI:CON_IPI00853265.1|SWISS-PROT:Q6KB66-1:#CONTAM#IPI:CON_00660358.2|TREMBL:Q0VBK2;Q8C1M7
NLLTHIENV	18.11	25462.4	32617.1	14200.1	19358.7	11056.5	24.4	1051.57	9	-0.3	526.79	80.21		367570	4	F4:22018	MSB66431A.raw	A8MW92|P20L1_HUMAN
NQITQLESL	71.49	16329.6	18334	21573.1	15627.4	6009.74	35.71	1044.55	9	0.3	523.28	89.03		2835400	4	F4:24378	MSB66431A.raw	Q53EZ4|CEP55_HUMAN
QSLEYLEQV	24.99	22848.5	33995.3	10760	22414.7	20572.3	26.12	1107.54	9	-1.1	554.779	84.7		682820	4	F4:23227	MSB66431A.raw	Q9BZE4|NOG1_HUMAN
QTPEFFQDV	119.75	9467.51	33802	21217.7	1016.62	8931.84	27.12	1109.5	9	-1.5	555.758	95.52		1816400	4	F4:26179	MSB66431A.raw	P49327|FAS_HUMAN
QVIPQFQTV	16.68	12730.5	15067.7	7329.22	8794.52	7772.47	18.49	1058.58	9	0.4	530.295	84.55		341360	4	F4:23178	MSB66431A.raw	P08047|SP1_HUMAN
RQIDQFLVV	3.97	3857.16	15937.9	8362.81	11027.9	2082.8	33.15	1116.63	9	-0.8	559.321	88.6		1574400	4	F4:24270	MSB66431A.raw	Q9BTC8|MTA3_HUMAN:O94776|MTA2_HUMAN
RQTSQVETV	63.99	14703.2	25469.9	17321.4	22980	14338.3	18.9	1046.54	9	0	524.275	70.21		96687	4	F4:19327	MSB66431A.raw	Q8N2C7|UNC80_HUMAN
RTITVGVYEA	247.3	29916.1	17551.4	26630.4	33834.9	30577.2	26.65	1107.59	10	1.7	554.804	53.12		166410	4	F4:14499	MSB66431A.raw	P24522|GA45A_HUMAN
SLISTILEV	5.92	17703	19874.2	11895.8	6404.57	3839.67	23.21	973.569	9	-1.3	487.791	113.63		348490	4	F4:32799	MSB66431A.raw	Q9Y263|PLAP_HUMAN
SQLDIQIKA	65.75	34908.9	34372.6	19263.2	38307.3	23991.1	29.42	1014.57	9	-1.1	508.292	66.28	248960	348460	1	F1:18289	MSB66428A.raw	Q15075|EEA1_HUMAN
SQVEIKLSL	42.8	16103	9317.92	19158.6	7675.03	3426.62	21.43	1015.59	9	-2.5	508.802	83.5		69061	4	F4:22921	MSB66431A.raw	Q13045|FLII_HUMAN
SQWGQWSQV	8.46	9823.87	16108.8	9490.38	20504.1	9605.25	34.78	1104.5	9	-1.1	553.256	86.73		121500	4	F4:23785	MSB66431A.raw	Q01085|TIAR_HUMAN
SQWSPALTI	24.84	2308.75	12623.5	4889.77	8024.91	5913.56	28.9	1001.52	9	0	501.766	99.09		2762500	4	F4:27351	MSB66431A.raw	P61077|UB2D3_HUMAN:P62837|UB2D2_HUMAN
SVINFLDQL	11.13	11395	15643.3	18509.4	5780.65	4441.54	29.48	1047.56	9	-2	524.786	112.54		689320	4	F4:32363	MSB66431A.raw	Q14657|LAGE3_HUMAN
SVLDDNKLLTL	249.59	26688.1	18050.4	30064.7	17574.2	21511.3	32.72	1229.69	11	-1.6	615.85	99.13		1012600	4	F4:27263	MSB66431A.raw	Q14204|DYHC1_HUMAN
TIATALEYV	7.21	24355.7	22978.5	14431.8	12697.4	14125.9	20.28	979.523	9	2.2	490.77	100.82		69073	4	F4:27812	MSB66431A.raw	P78537|BL1S1_HUMAN
TIMPKDIQL	318.65	19496.8	5446.15	18903.1	2914	5666.09	26.72	1057.58	9	-1.3	529.799	81.71		751530	1	F1:22676	MSB66428A.raw	P84243|H33_HUMAN:P68431|H31_HUMAN:Q71DI3|H32_HUMAN:Q16695|H31T_HUMAN:Q5TEC6|H3PS2_HUMAN:Q6NXT2|H3C_HUMAN
TQLELSEQL	42.03	16401.3	25364.3	18381.9	18524.3	11605.2	27.34	1059.54	9	-0.5	530.779	80.48		103240	4	F4:22119	MSB66431A.raw	Q8IWJ2|GCC2_HUMAN
VTFKEYVTV	54.01	7451.32	26705.7	6943.03	7571.19	9747	35.03	1084.58	9	-1	543.297	73.62	283890	735340	4	F4:20275	MSB66431A.raw	O00257|CBX4_HUMAN
YQDEVFGGF	53.77	3100.34	17435.4	21715.4	12306.6	2481.48	49.7	1060.45	9	-0.6	531.232	98.4		1733100	4	F4:27044	MSB66431A.raw	Q13283|G3BP1_HUMAN
YQLDPTASISA	120.68	34667.2	28342.2	27324.2	23415.4	26202.5	39.85	1164.57	11	-2.3	583.289	74.55		669600	4	F4:20551	MSB66431A.raw	P45880|VDAC2_HUMAN
YTIPDEYRI	29	4152.55	27532.8	6156.9	11618.6	8333.37	25.21	1168.58	9	-2	585.294	77.64		115110	4	F4:21415	MSB66431A.raw	P43243|MATR3_HUMAN
YVIEDDVNM	26.81	27228.5	18820.2	20638.5	5730.64	4250.97	38.94	1096.47	9	-1.1	549.244	75.45		535240	4	F4:20781	MSB66431A.raw	P49736|MCM2_HUMAN
AYDDKIYYF	7513.74	126.2	28641.2	33789.2	13149	200.91	32.15	1196.54	9	0.8	599.277	82.38		76203	4	F4:22628	MSB66431A.raw	O75326|SEM7A_HUMAN
AYIPKLLQL	5473.39	97.2	22988.4	31537.5	6541.41	118.48	25.72	1057.65	9	-0.4	529.834	104.29		375920	4	F4:29135	MSB66431A.raw	Q6ZMV5|P4R3C_HUMAN
AYIQESATF	13526.2	18.78	22628.8	32735.9	10709.3	344.68	30.69	1028.48	9	-0.6	515.248	68.75	0	306970	3	F3:18988	MSB66430A.raw	O95140|MFN2_HUMAN
AYLEAHETF	11965.1	11.61	25742.2	28564.8	13941.8	292.53	26.91	1079.49	9	-1.3	540.753	55		355810	4	F4:14978	MSB66431A.raw	P57740|NU107_HUMAN
AYLEAYKEF	18256.2	32.22	31221.7	35615.4	16365.1	298.76	38.08	1132.54	9	-2.5	567.278	73.99		84144	4	F4:20350	MSB66431A.raw	Q9HBU6|EKI1_HUMAN
AYLESFYKF	6759.5	4.56	32170.9	24793.7	20879.8	424.46	28.08	1166.56	9	-1	584.289	98.08		122360	4	F4:26922	MSB66431A.raw	P61421|VA0D1_HUMAN
EYMEHVYLI	1858.34	6.87	26400.9	8780.92	18570	483.41	26.49	1195.56	9	-3.1	598.785	88.7		1081000	4	F4:24300	MSB66431A.raw	Q9H1P3|OSBL2_HUMAN
FYLEGGFSKF	4019.58	12.43	20451.1	23209.8	18277.6	360.1	48.02	1193.58	10	-0.3	597.795	98.46	7379200	634950	3	F3:27216	MSB66430A.raw	Q16828|DUS6_HUMAN
FYTVIPHNF	14685.1	10.76	28862.7	21794.8	16850.6	54.28	40.89	1136.57	9	-1.4	569.289	88.98	0	659590	4	F4:24371	MSB66431A.raw	Q9Y6F1|PARP3_HUMAN
GYSEHFVEF	13667.5	32.66	26698.8	33016.9	14385.7	113.27	39.68	1113.48	9	-0.2	557.745	77.8		2800100	4	F4:21383	MSB66431A.raw	P36959|GMPR1_HUMAN:Q9P2T1|GMPR2_HUMAN
HYPPVQVLF	15825.3	16.65	25523.7	25185.7	3877.63	67.96	31.55	1098.59	9	0.5	550.301	90.27	267280	676490	4	F4:24717	MSB66431A.raw	P52701|MSH6_HUMAN
IYIKHPHLF	15781.4	4.17	25361.5	22788.8	9442.03	26.87	34.45	1166.66	9	-0.2	584.337	65.7		370670	1	F1:18126	MSB66428A.raw	Q9H147|TDIF1_HUMAN
KYFEKQFEL	1327.2	46.02	22655.8	19613.5	5369.8	67.4	37.9	1230.63	9	-1.1	616.321	65.24		445800	4	F4:17876	MSB66431A.raw	Q6P1N9|TATD1_HUMAN
KYFLKPEVL	19227.8	143.94	25062.3	30424.7	7217.4	340.3	26.01	1135.66	9	0	568.839	65.46		122820	4	F4:17962	MSB66431A.raw	Q6PIU2|NCEH1_HUMAN
KYLQSTISF	11570.8	11.98	17803.9	28218	11314.3	299.24	30.86	1085.58	9	1	543.796	72.32		586320	4	F4:19910	MSB66431A.raw	O95985|TOP3B_HUMAN
KYNANFVTF	11413.5	5.55	19844.5	26607.3	8360.46	77.4	39.64	1102.54	9	0.8	552.28	79.53		1344000	1	F1:22071	MSB66428A.raw	Q9Y2K7|KDM2A_HUMAN
KYPHYFPLL	3286.24	7.77	23180.2	26423.7	529.92	117.51	37.07	1176.63	9	-1.8	589.323	89.59		667130	4	F4:24503	MSB66431A.raw	P52888|THOP1_HUMAN
LYQPNFNTNF	10599.6	8.79	25994.1	27969	7864.25	408.69	42.62	1256.58	10	1.2	629.299	92.66		665410	4	F4:25321	MSB66431A.raw	Q7L576|CYFP1_HUMAN
NYAAALETF	15778.1	10.33	24237.7	26842.7	17977.3	214.5	39.31	998.471	9	-0.6	500.242	92.13		859590	4	F4:25232	MSB66431A.raw	Q9Y2Z0|SGT1_HUMAN
NYISGIQTI	5659.65	12.77	23856.3	16132	10156.6	214.7	24.86	1007.53	9	-0.7	504.771	84.09		1917500	4	F4:23023	MSB66431A.raw	Q15393|SF3B3_HUMAN
NYVQAVEEF	19589.6	37.46	29632	30490.6	23367.8	221.75	30.1	1097.5	9	-0.2	549.759	89.85		269220	4	F4:24607	MSB66431A.raw	P49321|NASP_HUMAN
QYAGKYVLF	22995.4	11.08	31685.6	32610.7	18890.6	349.98	23.66	1087.57	9	-2.3	544.791	80.68		530250	4	F4:22203	MSB66431A.raw	P22352|GPX3_HUMAN
RYQDIIHSI	3085.35	6.3	15314.2	15059.2	7469.48	166.38	15.53	1143.6	9	1.4	572.81	61.54		127780	4	F4:16810	MSB66431A.raw	Q9UIG0|BAZ1B_HUMAN
RYQQWMERF	20268.5	5.55	26826.4	31115.5	25026	454.81	28.41	1342.62	9	-1.2	672.318	67.53		145170	4	F4:18588	MSB66431A.raw	Q9BQ52|RNZ2_HUMAN
SYILTHFIF	12424.5	10.42	28947.8	24460	21105.3	442.58	14.83	1139.6	9	-5.9	570.805	93.58		200980	4	F4:25587	MSB66431A.raw	Q9NTG1|PKDRE_HUMAN
SYPKIIEEF	15455.9	10.27	27932.2	33122.4	4826.95	133.64	24.61	1124.58	9	-0.5	563.295	88.36		1107000	4	F4:24373	MSB66431A.raw	Q9BXW9|FACD2_HUMAN
TYDYNFHSF	9745.21	17.75	14296	25627.7	5194.75	59.61	35.79	1192.48	9	-1.6	597.248	74.94		566450	4	F4:20623	MSB66431A.raw	Q9NR48|ASH1L_HUMAN
VYMDWYEKF	9537.73	2.89	30714.8	19780	17421.8	87.67	24.52	1279.56	9	-3.7	640.784	101.61		1089100	4	F4:28183	MSB66431A.raw	O75643|U520_HUMAN
VYSQFITQL	10453.6	70.37	24576.8	24963.2	4684.84	82.56	40.51	1097.58	9	-0.9	549.795	101.15	0	3407600	3	F3:27940	MSB66430A.raw	Q92878|RAD50_HUMAN
YYIQNGIQSF	7513.82	8.11	13127.6	26654.9	9219.93	72.98	14.78	1231.59	10	-0.9	616.8	89.03		271280	4	F4:24389	MSB66431A.raw	P78527|PRKDC_HUMAN
YYLSKIEEL	1474.63	26.8	20496.6	24162.6	3393.71	30.83	35.54	1156.6	9	-1	579.308	85.2		164960	4	F4:23366	MSB66431A.raw	P62195|PRS8_HUMAN
AYLPKILQI	6748.68	34.78	31485	21780.9	15791.8	823.11	25.72	1057.65	9	-0.4	529.834	104.29		375920	4	F4:29135	MSB66431A.raw	O75691|UTP20_HUMAN
EYTDVLQKI	20644.6	299.47	37537.6	21418.9	30539.1	6480.83	34.86	1107.58	9	-0.2	554.798	77.33		2151900	4	F4:21260	MSB66431A.raw	Q8TE68|ES8L1_HUMAN
EYVEKFYRI	9497.36	29.98	36289.6	20636.5	27403.5	3689.72	30.31	1245.64	9	-0.4	623.827	63.15		330000	4	F4:17245	MSB66431A.raw	Q92878|RAD50_HUMAN
KWFFQKLRF	19309.9	32.31	32556.8	27526.8	29884.4	3929.06	21.26	1298.73	9	-2.1	650.37	91.2		122000	4	F4:24998	MSB66431A.raw	P61353|RL27_HUMAN
KWYDRRDYVF	18038.5	30.29	21999.2	30445.8	21559.8	2094.03	15.86	1446.7	10	-1	483.242	63.41		106510	4	F4:17405	MSB66431A.raw	Q15185|TEBP_HUMAN
KYVENFGLI	4321.83	12.29	25729.4	17966.8	10325.3	1394.06	20.3	1081.58	9	-1.5	541.797	84.78		163460	4	F4:23296	MSB66431A.raw	Q15005|SPCS2_HUMAN
LFIATSQKF	16092.2	39.03	25084.8	24600.7	15827.5	688.66	27.67	1053.59	9	0.2	527.8	71.22		462010	4	F4:19559	MSB66431A.raw	Q6IBW4|CNDH2_HUMAN
LYQHEINLF	25036.5	11.14	35465.5	31761.8	24036.4	655.69	21.81	1175.6	9	-1.3	588.805	85.2		73387	4	F4:23372	MSB66431A.raw	Q03701|CEBPZ_HUMAN
NYASTFTWW	23173.5	26.54	29354	24637.5	30322.5	2777.65	36.31	1174.51	9	-0.3	588.261	111.09	462620	481540	3	F3:31698	MSB66430A.raw	Q15800|MSMO1_HUMAN
QYESKVFYL	13222.9	393.71	30633.5	32600.5	15332.8	551	33.95	1175.59	9	1.8	588.802	79.4		530060	4	F4:21818	MSB66431A.raw	P61981|1433G_HUMAN:Q04917|1433F_HUMAN
RFIGATANF	6851.69	18.31	10987.8	27679.1	9848.88	545.65	29.86	995.519	9	-1.3	498.766	61.9	244600	702230	3	F3:16940	MSB66430A.raw	Q8TDP1|RNH2C_HUMAN
RYLSPKYIKMF	20656.9	47.07	31446.8	34221.9	20425.3	4514.55	29.68	1444.79	11	-1.2	482.603	69.53		132940	4	F4:19174	MSB66431A.raw	P60842|IF4A1_HUMAN
TYGKIDLGF	26081.4	27.5	32673.3	32964.4	32356.6	2776.78	18.83	1012.52	9	-2.1	507.268	82.99		270220	4	F4:22828	MSB66431A.raw	Q8TCG1|CIP2A_HUMAN
VYEYVVERF	26189.5	34.5	36625.3	32287.4	26337.5	1038.23	42.79	1202.6	9	-3.8	602.304	78.23	0	501750	4	F4:21508	MSB66431A.raw	Q5TAX3|TUT4_HUMAN
VYLDHAGATLF	8727.13	28.44	26606.2	30826.3	23006.8	1904.28	30.67	1205.61	11	-0.2	603.811	84.95		1302200	4	F4:23245	MSB66431A.raw	Q96EN8|MOCOS_HUMAN
VYVDLGGSHVF	14889.3	45.74	24035	32055.2	26232	1277.32	48.39	1191.59	11	-0.2	596.803	85	0	8660700	4	F4:23386	MSB66431A.raw	Q14692|BMS1_HUMAN
YYPSTPGRYSI	13336.2	93.09	1283.14	8423.84	5313.5	1697.15	39.87	1302.62	11	-0.8	652.319	60.94		778080	4	F4:16645	MSB66431A.raw	O75369|FLNB_HUMAN
RPADVIFATV	621.55	21155.8	63.03	654.7	15992.1	22487	24.47	1087.6	10	-1.5	544.808	81.24		496060	4	F4:22309	MSB66431A.raw	P33993|MCM7_HUMAN
LAPNIISQL	1443.97	13485.7	12171.3	14906.2	44.29	1650.57	25.99	967.57	9	-1.4	484.792	100.35		714900	1	F1:28563	MSB66428A.raw	P30044|PRDX5_HUMAN
FFKDRHWLF	12890.2	63.88	27818.7	24946.8	14244.1	58.59	35.9	1294.66	9	-2.1	648.336	82.49		576010	4	F4:22682	MSB66431A.raw	Q6P1Q9|MET2B_HUMAN:Q96IZ6|MET2A_HUMAN
FYITSRTQF	18080.7	56.41	16100.8	29092.2	7302.07	25.52	38.4	1161.58	9	-0.7	581.798	71.82	524340	140390	3	F3:19825	MSB66430A.raw	P12931|SRC_HUMAN
HYKPTPLYF	27096	40.95	23990.9	28751.8	16758.2	33.11	20.07	1164.6	9	3.4	583.308	60.14		160330	4	F4:16466	MSB66431A.raw	Q9NTJ3|SMC4_HUMAN
IYNQVNVVL	11490.7	136.52	17504	23019.8	6130.65	85.94	35.24	1060.59	9	-0.5	531.303	85.65		957700	4	F4:23469	MSB66431A.raw	Q9NUQ9|CYRIB_HUMAN
LYENTFQEL	14702.9	280.03	20799.3	28204.2	5370.61	144.96	21.74	1155.54	9	-1.7	578.779	88.86		178390	4	F4:24335	MSB66431A.raw	P28290|ITPI2_HUMAN
VYDPLFSQL	4177.15	184.17	15010.9	21833.7	2985.68	112.13	32.37	1080.55	9	0.7	541.282	108.78	1767400	2482100	4	F4:30936	MSB66431A.raw	Q9UH36|SRR1L_HUMAN
YYEHEFVEL	7682.43	366.82	23429.6	29575.9	4227.4	118.43	20.78	1227.54	9	-1.9	614.779	79.5		772460	4	F4:21877	MSB66431A.raw	O43861|ATP9B_HUMAN
IRSDTSFMF	11923.2	3650.36	29324.8	21944.3	28668.2	56.93	38.92	1102.51	9	-1.5	552.262	82.98	0	107990	1	F1:22998	MSB66428A.raw	P09525|ANXA4_HUMAN
IYREDRPSL	24190.5	2750.59	4224.51	31875	6017.15	304.44	14.71	1147.6	9	0	574.807	89.58		415030	4	F4:24550	MSB66431A.raw	A4D0V7|CPED1_HUMAN
LYDELRNLL	5365.67	782.15	13691.1	22921.6	5634.85	200.4	16.66	1147.62	9	-0.2	574.819	98.45		2973200	4	F4:27097	MSB66431A.raw	Q66K74|MAP1S_HUMAN

## Sheet: All No Treatment Peptides
Peptide	HLA-A*02:06 Binding Affinity (nM)	HLA-A*24:02 Binding Affinity (nM)	HLA-B*07:02 Binding Affinity (nM)	HLA-B*59:01 Binding Affinity (nM)	HLA-C*01:02 Binding Affinity (nM)	HLA-C*07:02 Binding Affinity (nM)	-10lgP	Mass	Length	ppm	m/z	RT	No Treatment Area	Gemcitabine Area	Fraction	Scan	Source File	Source Protein (Uniprot)
AAILGMHNL	395.01	22130.5	7894.77	21011.7	5727.17	12933.9	37.57	938.501	9	3	470.259	77	3492600		1	F1:21396	MSB66428A.raw	Q9NYL9|TMOD3_HUMAN
AFMKGVFTF	3584.45	10.47	18773	25415.4	19775.3	1802.65	28.84	1046.53	9	-1.2	524.27	97.06	2579500	3198800	1	F1:29474	MSB60101A.raw	Q96I45|TM141_HUMAN
AFMKGVFTF	3584.45	10.47	18773	25415.4	19775.3	1802.65	32.59	1046.53	9	-2.2	524.269	103.56	276080		3	F3:28744	MSB66430A.raw	Q96I45|TM141_HUMAN
AGPNTNGSQF	31487.3	20469.1	389.2	28299.3	6165.64	21144.6	38.74	991.436	10	-0.6	496.725	28.21	8838600	2512400	1	F1:7623	MSB60101A.raw	P62937|PPIA_HUMAN:F5H284|PAL4D_HUMAN:A0A075B759|PAL4E_HUMAN:Q9Y536|PAL4A_HUMAN:P0DN26|PAL4F_HUMAN:P0DN37|PAL4G_HUMAN:A0A0B4J2A2|PAL4C_HUMAN:P30405|PPIF_HUMAN
AGPNTNGSQF	31487.3	20469.1	389.2	28299.3	6165.64	21144.6	41.06	991.436	10	-1	496.725	33.98	7971900		1	F1:9021	MSB66428A.raw	P62937|PPIA_HUMAN:A0A0B4J2A2|PAL4C_HUMAN:Q9Y536|PAL4A_HUMAN:P0DN37|PAL4G_HUMAN:F5H284|PAL4D_HUMAN:A0A075B759|PAL4E_HUMAN:P0DN26|PAL4F_HUMAN:P30405|PPIF_HUMAN
AGPNTNGSQF	31487.3	20469.1	389.2	28299.3	6165.64	21144.6	41.06	991.436	10	-1	496.725	33.98	641720		1	F1:9021	MSB66428A.raw	P62937|PPIA_HUMAN:A0A0B4J2A2|PAL4C_HUMAN:Q9Y536|PAL4A_HUMAN:P0DN37|PAL4G_HUMAN:F5H284|PAL4D_HUMAN:A0A075B759|PAL4E_HUMAN:P0DN26|PAL4F_HUMAN:P30405|PPIF_HUMAN
AIDPHLLLSV	62.17	25678.2	20009.7	25219.2	12418.6	22574.1	30.44	1076.62	10	-0.9	539.318	100.72	1098300		1	F1:28680	MSB66428A.raw	Q29RF7|PDS5A_HUMAN
AIVKEIVNI	116.05	23942.1	26948.3	24176.7	24600.2	28576.5	26.38	997.617	9	0.5	499.816	73.61	1311000	2873600	1	F1:21403	MSB60101A.raw	P43246|MSH2_HUMAN
ALIDALRDNETL	145.29	30957.3	28265	35911.5	24097.5	25764.8	46.89	1342.71	12	-0.5	672.362	89.24	16442000	4701400	1	F1:26602	MSB60101A.raw	Q9NYL9|TMOD3_HUMAN
ALIDALRDNETL	145.29	30957.3	28265	35911.5	24097.5	25764.8	51.29	1342.71	12	-0.1	672.362	92.9	2445600	428150	1	F1:25907	MSB66428A.raw	Q9NYL9|TMOD3_HUMAN
ALLDGSNVVFKL	177.07	27078.4	30619.9	33614.6	27898	29994.9	33.04	1274.72	12	0.6	638.369	104.85	4652600		1	F1:32467	MSB60101A.raw	O15212|PFD6_HUMAN
ALLDKLYAL	4.61	9070.62	8040.29	24522.3	3933.57	2054.38	30.02	1018.61	9	0.8	510.311	104.65	314690	0	2	F2:29210	MSB66429A.raw	Q9NV31|IMP3_HUMAN
ALLNIKVKL	359.48	22539.2	20574.1	30446.1	20527	17715.7	28.68	1010.69	9	-0.7	506.349	77.62	557810		1	F1:22741	MSB60101A.raw	P05783|K1C18_HUMAN:#CONTAM#IPI:CON_IPI00311493.5|SWISS-PROT:P05784
ALLNIKVKL	359.48	22539.2	20574.1	30446.1	20527	17715.7	30.14	1010.69	9	0.1	506.35	82.71	169330		3	F3:22853	MSB66430A.raw	P05783|K1C18_HUMAN:#CONTAM#IPI:CON_IPI00311493.5|SWISS-PROT:P05784
ALPDDLVEV	5.46	22591.7	32168.1	30086.5	830.56	6045.01	30.73	969.502	9	-0.2	485.758	93.88	218710	230140	4	F4:25758	MSB66431A.raw	Q14651|PLSI_HUMAN
ALPEIFTEL	10.81	4098.23	14584.9	29114.3	24.83	833.98	32.63	1031.55	9	-0.9	516.784	111.31	1362900	11124000	2	F2:34489	MSB60102A.raw	Q2VIR3|IF2GL_HUMAN:P41091|IF2G_HUMAN
ALVVQVAEA	246.34	41172.7	27819	33262.2	30500.8	31384.3	28.63	898.512	9	0.3	450.264	63.88	10134000	27000000	2	F2:18299	MSB60102A.raw	P07686|HEXB_HUMAN
ALVVQVAEA	246.34	41172.7	27819	33262.2	30500.8	31384.3	32.75	898.512	9	-1.1	450.263	66.14	540510	3870400	2	F2:18226	MSB66429A.raw	P07686|HEXB_HUMAN
ALVVQVAEA	246.34	41172.7	27819	33262.2	30500.8	31384.3	32.75	898.512	9	-1.1	450.263	66.14	2390500	6476900	2	F2:18226	MSB66429A.raw	P07686|HEXB_HUMAN
AQIKEMVEL	14.37	14438.5	22686.5	30225.2	14153.6	8562.97	37.51	1059.56	9	0.3	530.789	73.65	493520	1195900	1	F1:20439	MSB66428A.raw	P55072|TERA_HUMAN
AQIKEMVEL	14.37	14438.5	22686.5	30225.2	14153.6	8562.97	37.51	1059.56	9	0.3	530.789	73.65	1122900	3004500	1	F1:20439	MSB66428A.raw	P55072|TERA_HUMAN
AQYLINVRL	137.95	17409	27892.3	23003.1	19100	10929.4	29.1	1088.63	9	0	545.324	85.71	71608		1	F1:25416	MSB60101A.raw	Q15366|PCBP2_HUMAN
ASFNDTFVHV	75.37	16421.5	28263.8	16197	19119.3	16247.1	49.27	1135.53	10	-0.1	568.772	74.98	1430200	9506700	2	F2:21701	MSB60102A.raw	P62263|RS14_HUMAN
ASFNDTFVHV	75.37	16421.5	28263.8	16197	19119.3	16247.1	57.78	1135.53	10	-0.6	568.772	77.46	1388700	414150	4	F4:21319	MSB66431A.raw	P62263|RS14_HUMAN
ASFNDTFVHV	75.37	16421.5	28263.8	16197	19119.3	16247.1	57.78	1135.53	10	-0.6	568.772	77.46	134230	2056800	4	F4:21319	MSB66431A.raw	P62263|RS14_HUMAN
AVFDKTLAEL	84.03	18428.5	4679.57	25356.3	6094.4	6611.22	38.77	1105.6	10	-0.2	553.808	88.24	615890		4	F4:24182	MSB66431A.raw	Q6VMQ6|MCAF1_HUMAN
AVIDVGINRV	33.99	36200.6	27938.8	25533.1	30923.8	29743.5	35.24	1054.61	10	-0.3	528.314	68.45	190150	348190	2	F2:18892	MSB66429A.raw	P13995|MTDC_HUMAN
AVIDVGINRV	33.99	36200.6	27938.8	25533.1	30923.8	29743.5	35.24	1054.61	10	-0.3	528.314	68.45	109770	868050	2	F2:18892	MSB66429A.raw	P13995|MTDC_HUMAN
AVIGDVIRV	8.71	31411.5	27385.4	19497.6	22171.5	18192.5	30.93	940.571	9	-0.3	471.292	75.52	7670300	6547300	1	F1:22031	MSB60101A.raw	Q9NR30|DDX21_HUMAN
AVIGDVIRV	8.71	31411.5	27385.4	19497.6	22171.5	18192.5	37.09	940.571	9	0.1	471.293	78.2	279850	3338400	4	F4:21583	MSB66431A.raw	Q9NR30|DDX21_HUMAN
AVIPRLVQL	22.48	14580	2896.65	22535.3	2347.01	2406.04	26.13	1007.65	9	0	504.832	84.97	5899300	26015000	2	F2:24971	MSB60102A.raw	P14923|PLAK_HUMAN
AVIPRLVQL	22.48	14580	2896.65	22535.3	2347.01	2406.04	34.41	1007.65	9	-0.3	504.832	90.58	2498200		4	F4:24777	MSB66431A.raw	P14923|PLAK_HUMAN
AVVTQVNKV	172.8	35251.2	24757.5	22836.7	23614.6	22995.1	26.57	956.566	9	-0.1	479.29	27.09	286770	690520	2	F2:7232	MSB60102A.raw	P62487|RPB7_HUMAN
AYAGARFVF	14408.9	16.59	12158	30427.3	13813.8	109.75	38.17	1000.51	9	-0.8	501.263	82.62	1720700		1	F1:22947	MSB66428A.raw	P40926|MDHM_HUMAN
AYKKTHETL	25725	230.5	15752.7	35468.9	10073.1	586.08	28.28	1089.58	9	-0.8	545.798	12.07	42937		1	F1:2827	MSB60101A.raw	Q16890|TPD53_HUMAN
AYLHTTTTF	14102.3	13.57	19179.2	30003	11395.9	305.21	33.68	1053.51	9	-0.3	527.764	53.31	12214000	9101400	1	F1:15268	MSB60101A.raw	O15438|MRP3_HUMAN
AYLHTTTTF	14102.3	13.57	19179.2	30003	11395.9	305.21	38.42	1053.51	9	0.2	527.764	53.08	6303000	1404600	3	F3:14459	MSB66430A.raw	O15438|MRP3_HUMAN
AYLHTTTTF	14102.3	13.57	19179.2	30003	11395.9	305.21	38.42	1053.51	9	0.2	527.764	53.08	4579100	2019900	3	F3:14459	MSB66430A.raw	O15438|MRP3_HUMAN
AYLPKILQI	6748.68	34.78	31485	21780.9	15791.8	823.11	15.09	1057.65	9	1.4	529.835	98.19	59645		1	F1:29889	MSB60101A.raw	O75691|UTP20_HUMAN
AYPEYLITF	10664.8	12.75	29814.3	33702.7	2572.48	123.3	30.85	1115.55	9	0	558.784	109.73	1178100	1824800	2	F2:33870	MSB60102A.raw	Q460N3|PAR15_HUMAN:Q460N5|PAR14_HUMAN
AYPEYLITF	10664.8	12.75	29814.3	33702.7	2572.48	123.3	20.4	1115.55	9	-1.8	558.783	109.89	1249700		3	F3:31282	MSB66430A.raw	Q460N5|PAR14_HUMAN:Q460N3|PAR15_HUMAN
AYPEYLITY	18941	464.87	36564.3	39108	11295	112.87	22.82	1131.55	9	0.1	566.782	98.27	682530		1	F1:29903	MSB60101A.raw	O95271|TNKS1_HUMAN:Q9H2K2|TNKS2_HUMAN
AYSAKIALF	21304.7	16.86	28669.1	35254.3	14119.8	280.28	31.12	982.549	9	0.6	492.282	78.43	1319200		1	F1:22946	MSB60101A.raw	Q12882|DPYD_HUMAN
AYVHMVTHF	14608.1	24.67	30444.8	34270.4	24474.1	740.07	40.65	1103.52	9	0.4	368.848	56.47	2202500	36611000	2	F2:16187	MSB60102A.raw	P55061|BI1_HUMAN
AYVHMVTHF	14608.1	24.67	30444.8	34270.4	24474.1	740.07	45.22	1103.52	9	0.6	368.848	55.53	18388000	9875100	4	F4:15168	MSB66431A.raw	P55061|BI1_HUMAN
AYVHMVTHF	14608.1	24.67	30444.8	34270.4	24474.1	740.07	45.22	1103.52	9	0.6	368.848	55.53	20600000	22999000	4	F4:15168	MSB66431A.raw	P55061|BI1_HUMAN
DYLEWPEYF	21896.4	51.3	37942.6	25422.2	33758.5	1478.61	30.36	1260.53	9	1.4	631.275	113.42	535990	1001400	2	F2:35325	MSB60102A.raw	P32321|DCTD_HUMAN
DYSSILQKF	33205.3	68.2	37295.5	31338.8	34715.7	1677.27	33.65	1099.55	9	-1.4	550.784	94.66	1387800	5320100	1	F1:28659	MSB60101A.raw	Q96RU3|FNBP1_HUMAN
DYVEGLRVF	27366.8	493.12	30979.1	34987.9	28982.6	828.1	45.66	1096.56	9	-1.6	549.284	92.76	1383900	8766700	4	F4:25369	MSB66431A.raw	P60660|MYL6_HUMAN
EQIKDIFYI	12.81	5240.99	30739.7	6676.71	32616.4	15640.6	32.26	1167.62	9	-2.9	584.814	103.77	1161900		3	F3:28836	MSB66430A.raw	Q9H814|PHAX_HUMAN
EQIKFFEEV	21	13021.7	29945.6	8453.33	26966.1	13437.6	35.35	1167.58	9	-1	584.797	88.98	185580	1087100	4	F4:24398	MSB66431A.raw	O75663|TIPRL_HUMAN
EQISQFLQA	284.74	32531.5	29136.7	16916.2	37584.3	22157.8	40.73	1062.53	9	-0.3	532.274	85.83	7268300	7832200	2	F2:25214	MSB60102A.raw	P37802|TAGL2_HUMAN
EYFESPFTI	6318.26	37.07	32135.1	7574.47	19210.3	890.54	29.17	1131.51	9	-0.2	566.763	108.97	1692100	8285900	2	F2:33540	MSB60102A.raw	P00414|COX3_HUMAN
EYFESPFTI	6318.26	37.07	32135.1	7574.47	19210.3	890.54	32.59	1131.51	9	-1.9	566.763	109.47	1501100	1539500	4	F4:31201	MSB66431A.raw	P00414|COX3_HUMAN
EYFKSFNF	34631.2	358.89	37774.7	32099.3	38395.7	6635.15	26.59	1080.49	8	-4.2	541.251	90.99	97139		1	F1:25346	MSB66428A.raw	Q8N1A6|CD033_HUMAN
EYFSYPVSL	11231.1	279.29	24575.2	18681.5	7604.77	133.33	34.79	1103.52	9	-0.2	552.766	105.11	13104000	30443000	2	F2:31834	MSB60102A.raw	P37088|SCNNA_HUMAN
EYFSYPVSL	11231.1	279.29	24575.2	18681.5	7604.77	133.33	16.79	1103.52	9	0	552.766	106.18	5335900		3	F3:29753	MSB66430A.raw	P37088|SCNNA_HUMAN
EYIKFLRSI	8142.1	79.65	25855.5	17943.7	22259.7	1536.51	37.17	1167.67	9	0.5	584.84	77.47	2102800	6425700	2	F2:22501	MSB60102A.raw	Q92769|HDAC2_HUMAN
EYIKFLRSI	8142.1	79.65	25855.5	17943.7	22259.7	1536.51	43.3	1167.67	9	-0.6	584.84	85.06	2061200	0	1	F1:23584	MSB66428A.raw	Q92769|HDAC2_HUMAN
EYIKFLRSI	8142.1	79.65	25855.5	17943.7	22259.7	1536.51	43.3	1167.67	9	-0.6	584.84	85.06	1089900	0	1	F1:23584	MSB66428A.raw	Q92769|HDAC2_HUMAN
EYIPKWEQF	27905.2	26.26	34740.1	30942.2	31523.1	1490.63	37.32	1238.6	9	-1.9	620.305	87.63	746540	1650600	3	F3:24185	MSB66430A.raw	Q9HBI5|CC014_HUMAN
EYIPKWEQF	27905.2	26.26	34740.1	30942.2	31523.1	1490.63	37.32	1238.6	9	-1.9	620.305	87.63	742220	3336400	3	F3:24185	MSB66430A.raw	Q9HBI5|CC014_HUMAN
EYIQFVPLL	5705.28	92.5	33401.4	21345.8	17925.3	681.37	28.54	1120.62	9	-0.8	561.315	113.32	1742500	5409200	2	F2:35255	MSB60102A.raw	P57678|GEMI4_HUMAN
EYLKVDAQF	25787.4	90.69	33893.9	30216.7	37377.9	4323.43	36.79	1111.55	9	-0.7	556.784	71.12	5859800	2920000	2	F2:20626	MSB60102A.raw	P54577|SYYC_HUMAN
EYLKVDAQF	25787.4	90.69	33893.9	30216.7	37377.9	4323.43	47.23	1111.55	9	-0.5	556.784	72.87	2791900	2091600	3	F3:20182	MSB66430A.raw	P54577|SYYC_HUMAN
EYLKVDAQF	25787.4	90.69	33893.9	30216.7	37377.9	4323.43	47.23	1111.55	9	-0.5	556.784	72.87	4822900	3844100	3	F3:20182	MSB66430A.raw	P54577|SYYC_HUMAN
EYPDRIMNTF	23763.8	106.24	4959.84	13287.5	17466.2	1958.97	49.9	1284.58	10	-0.8	643.297	77.83	4559800		4	F4:21407	MSB66431A.raw	P07437|TBB5_HUMAN:P68371|TBB4B_HUMAN:Q13885|TBB2A_HUMAN:Q9BVA1|TBB2B_HUMAN:Q13509|TBB3_HUMAN
EYQKVWNLF	29642.2	10.17	33108.8	31678	34468.6	3089.66	38.16	1225.61	9	-0.1	613.814	98.24	13431000	26744000	2	F2:29416	MSB60102A.raw	Q9H0J9|PAR12_HUMAN
EYQKVWNLF	29642.2	10.17	33108.8	31678	34468.6	3089.66	42.14	1225.61	9	-0.1	613.814	103.71	5529900	11661000	3	F3:28780	MSB66430A.raw	Q9H0J9|PAR12_HUMAN
EYQKVWNLF	29642.2	10.17	33108.8	31678	34468.6	3089.66	42.14	1225.61	9	-0.1	613.814	103.71	5934500	4327800	3	F3:28780	MSB66430A.raw	Q9H0J9|PAR12_HUMAN
EYYDKHFTEF	21871.3	38.97	25446.5	28734.7	19021	361.54	42.29	1377.59	10	-1.2	689.8	61.36	952310	0	4	F4:16864	MSB66431A.raw	P38606|VATA_HUMAN
FAFQAEIAQL	253.27	7939.83	12245.1	9240.81	4968.7	4264.84	16.12	1136.59	10	-1.1	569.3	108.86	913910		1	F1:34067	MSB60101A.raw	P07900|HS90A_HUMAN:P08238|HS90B_HUMAN:Q14568|HS902_HUMAN:Q58FF8|H90B2_HUMAN:Q58FF7|H90B3_HUMAN
FAIPLIEKL	41.75	14838.1	16381.8	4770.56	3102.46	1275.09	27.75	1042.64	9	1.3	522.329	107.42	6841000	29876000	1	F1:33388	MSB60101A.raw	Q9NR30|DDX21_HUMAN
FAIPLIEKL	41.75	14838.1	16381.8	4770.56	3102.46	1275.09	27.65	1042.64	9	-0.6	522.328	108.2	5279400		3	F3:30620	MSB66430A.raw	Q9NR30|DDX21_HUMAN
FAIPLIEKL	41.75	14838.1	16381.8	4770.56	3102.46	1275.09	27.65	1042.64	9	-0.6	522.328	108.2	4540200		3	F3:30620	MSB66430A.raw	Q9NR30|DDX21_HUMAN
FAISILQQI	10.96	9234.21	15710.8	1755.95	5359.41	3265.61	30.97	1031.6	9	-0.1	516.808	110.65	10653000	17207000	2	F2:34195	MSB60102A.raw	P60842|IF4A1_HUMAN
FAISILQQI	10.96	9234.21	15710.8	1755.95	5359.41	3265.61	33.69	1031.6	9	-0.9	516.808	110.24	5738700		1	F1:32665	MSB66428A.raw	P60842|IF4A1_HUMAN
FAISILQQI	10.96	9234.21	15710.8	1755.95	5359.41	3265.61	33.69	1031.6	9	-0.9	516.808	110.24	3488900	2204900	1	F1:32665	MSB66428A.raw	P60842|IF4A1_HUMAN
FAISILQQL	16	12281.9	8445.93	5804.65	2138.22	796.52	30.97	1031.6	9	-0.1	516.808	110.65	10653000	17207000	2	F2:34195	MSB60102A.raw	Q14240|IF4A2_HUMAN
FAISILQQL	16	12281.9	8445.93	5804.65	2138.22	796.52	33.69	1031.6	9	-0.9	516.808	110.24	5738700		1	F1:32665	MSB66428A.raw	Q14240|IF4A2_HUMAN
FAISILQQL	16	12281.9	8445.93	5804.65	2138.22	796.52	33.69	1031.6	9	-0.9	516.808	110.24	3488900	2204900	1	F1:32665	MSB66428A.raw	Q14240|IF4A2_HUMAN
FALPGLLHA	17.31	34011.1	15923	4202.27	15590.9	8566.12	34.03	937.538	9	0.4	469.777	98.14	157070000	674620000	2	F2:29381	MSB60102A.raw	Q13751|LAMB3_HUMAN
FALPGLLHA	17.31	34011.1	15923	4202.27	15590.9	8566.12	34.96	937.538	9	0	469.776	100.43	39056000	107580000	4	F4:27732	MSB66431A.raw	Q13751|LAMB3_HUMAN
FALPGLLHA	17.31	34011.1	15923	4202.27	15590.9	8566.12	34.96	937.538	9	0	469.776	100.43	4631300	224770000	4	F4:27732	MSB66431A.raw	Q13751|LAMB3_HUMAN
FANDGSFLEL	104.49	21300.5	7819.12	7874.22	2300.47	2532.93	40.25	1111.52	10	0.5	556.767	106.95	13647000	37042000	2	F2:32609	MSB60102A.raw	Q9BQ61|TRIR_HUMAN
FAYDGKDYL	29.94	24797.7	8585.88	4396.64	538.41	380.84	30.93	1090.5	9	-0.8	546.255	71.73	146470	3824500	2	F2:20730	MSB60102A.raw	P13747|HLAE_HUMAN
FAYDGKDYL	29.94	24797.7	8585.88	4396.64	538.41	380.84	40.54	1090.5	9	0.2	546.256	72.56	509720	528330	4	F4:20049	MSB66431A.raw	P13747|HLAE_HUMAN
FFYGKSLLEL	1053.58	548.71	15556.7	18910	4512.3	299.66	36.67	1215.65	10	-1.2	608.833	105.88	9138600	3540400	2	F2:32204	MSB60102A.raw	P49321|NASP_HUMAN
FFYGKSLLEL	1053.58	548.71	15556.7	18910	4512.3	299.66	26.29	1215.65	10	3	608.836	107.05	9369000		3	F3:30194	MSB66430A.raw	P49321|NASP_HUMAN
FFYGKSLLEL	1053.58	548.71	15556.7	18910	4512.3	299.66	26.29	1215.65	10	3	608.836	107.05	2284400		3	F3:30194	MSB66430A.raw	P49321|NASP_HUMAN
FFYPLDFTF	661.88	22.14	19861.3	6812.36	9635.75	127.53	43.78	1195.56	9	-0.6	598.786	116.68	17570000	29669000	1	F1:36995	MSB60101A.raw	P32119|PRDX2_HUMAN:Q06830|PRDX1_HUMAN:Q13162|PRDX4_HUMAN:P30048|PRDX3_HUMAN
FFYPLDFTF	661.88	22.14	19861.3	6812.36	9635.75	127.53	48.38	1195.56	9	0.8	598.787	115.85	5360900	2471200	1	F1:34891	MSB66428A.raw	Q06830|PRDX1_HUMAN:P32119|PRDX2_HUMAN:Q13162|PRDX4_HUMAN:P30048|PRDX3_HUMAN
FFYPLDFTF	661.88	22.14	19861.3	6812.36	9635.75	127.53	48.38	1195.56	9	0.8	598.787	115.85	2492900		1	F1:34891	MSB66428A.raw	Q06830|PRDX1_HUMAN:P32119|PRDX2_HUMAN:Q13162|PRDX4_HUMAN:P30048|PRDX3_HUMAN
FGANAILGV	26.97	25871.8	22149.5	7171.94	10915.3	10353.9	16.37	860.476	9	-0.3	431.245	96.55	275710	973180	3	F3:26623	MSB66430A.raw	P06733|ENOA_HUMAN:P13929|ENOB_HUMAN:P09104|ENOG_HUMAN
FGFEITHEV	8.78	15752	18326.5	1000.8	4196.05	1373.51	43.16	1077.51	9	-0.7	539.763	84.65	523510	122150	3	F3:23400	MSB66430A.raw	O96015|DNAL4_HUMAN
FGFEITHEV	8.78	15752	18326.5	1000.8	4196.05	1373.51	43.16	1077.51	9	-0.7	539.763	84.65	276900	1053600	3	F3:23400	MSB66430A.raw	O96015|DNAL4_HUMAN
FGLARAFGV	51.6	19758.4	23168.4	4398.88	17148.4	13043.1	32.46	936.518	9	-0.8	469.266	83.33	1898000	0	1	F1:24583	MSB60101A.raw	P24941|CDK2_HUMAN:Q00526|CDK3_HUMAN
FGLARAFGV	51.6	19758.4	23168.4	4398.88	17148.4	13043.1	40.11	936.518	9	-0.5	469.266	91.12	1544800	0	2	F2:25172	MSB66429A.raw	P24941|CDK2_HUMAN:Q00526|CDK3_HUMAN
FGLARAFGV	51.6	19758.4	23168.4	4398.88	17148.4	13043.1	40.11	936.518	9	-0.5	469.266	91.12	382280	2350300	2	F2:25172	MSB66429A.raw	P24941|CDK2_HUMAN:Q00526|CDK3_HUMAN
FIAKSFYDL	15.28	5928.36	5592.45	14034.5	1881.14	3777.74	40.56	1102.57	9	0.3	552.292	89.32	18164000	10578000	3	F3:24567	MSB66430A.raw	P18283|GPX2_HUMAN
FIEENDEVL	472.33	31081.2	17798.9	22900.8	3073.99	8489.45	39.46	1106.51	9	0.6	554.264	78.69	584000		1	F1:21810	MSB66428A.raw	P62266|RS23_HUMAN
FILPDSLPLDTL	69.78	23699.1	14818.5	18217.2	8141.93	19958.4	46.77	1342.74	12	-1.9	672.375	113.73	448040000	777810000	2	F2:35417	MSB60102A.raw	P62314|SMD1_HUMAN
FILPDSLPLDTL	69.78	23699.1	14818.5	18217.2	8141.93	19958.4	52.81	1342.74	12	-0.7	672.376	113.04	291700000	0	1	F1:33704	MSB66428A.raw	P62314|SMD1_HUMAN
FITGVGILAL	99.51	28023.9	7329.22	19881.9	10152.6	15511.9	36.5	1002.61	10	-1	502.312	111.83	10744000	1436200	1	F1:33251	MSB66428A.raw	Q9NYL9|TMOD3_HUMAN
FITGVGILAL	99.51	28023.9	7329.22	19881.9	10152.6	15511.9	36.5	1002.61	10	-1	502.312	111.83	1967200		1	F1:33251	MSB66428A.raw	Q9NYL9|TMOD3_HUMAN
FIVHTIEEI	12.13	19188.7	21171.2	8895.38	8920.44	9585.63	24.58	1099.59	9	-0.1	550.803	85.22	1052900		3	F3:23508	MSB66430A.raw	P12814|ACTN1_HUMAN:O43707|ACTN4_HUMAN
FIVHTIEEI	12.13	19188.7	21171.2	8895.38	8920.44	9585.63	24.58	1099.59	9	-0.1	550.803	85.22	994510	713410	3	F3:23508	MSB66430A.raw	P12814|ACTN1_HUMAN:O43707|ACTN4_HUMAN
FKFPNRLNL	6591.58	25402.4	13268	14975.4	8095.46	154.31	33.26	1147.65	9	0.3	383.557	76.88	3785100	848640	1	F1:22458	MSB60101A.raw	P09382|LEG1_HUMAN
FKFPNRLNL	6591.58	25402.4	13268	14975.4	8095.46	154.31	40.34	1147.65	9	0.7	574.833	84.85	6718600	77243	1	F1:23553	MSB66428A.raw	P09382|LEG1_HUMAN
FKSLADGILL	453.1	25603	25053.3	19714.8	18082.3	10420	33.31	1075.63	10	-0.6	538.821	95.92	29681000	20810000	1	F1:29058	MSB60101A.raw	Q14651|PLSI_HUMAN
FLAEDALNTV	4.19	27273	21790.5	11509.8	10035.1	11704.3	25.2	1091.55	10	-1.6	546.781	94.84	623950		3	F3:26182	MSB66430A.raw	Q08345|DDR1_HUMAN
FLASPEYVNL	76.07	15054.5	14803.2	15127.2	3769.08	8200.36	33.87	1151.59	10	2.6	576.802	96.91	6682600		1	F1:29512	MSB60101A.raw	P09211|GSTP1_HUMAN
FLASPEYVNL	76.07	15054.5	14803.2	15127.2	3769.08	8200.36	42.98	1151.59	10	-1.7	576.799	100.33	580530		1	F1:28540	MSB66428A.raw	P09211|GSTP1_HUMAN
FLDGNELTL	20.3	16711.9	12368.4	17944.5	1013.61	1371.19	25.16	1020.51	9	0	511.264	102.55	4106900	793590	1	F1:29294	MSB66428A.raw	O00299|CLIC1_HUMAN
FLDGNELTL	20.3	16711.9	12368.4	17944.5	1013.61	1371.19	25.16	1020.51	9	0	511.264	102.55	1918300	1403000	1	F1:29294	MSB66428A.raw	O00299|CLIC1_HUMAN
FLEKLLPPV	4.62	24940.5	16087.9	11075.1	9473.04	11059.8	28.93	1054.64	9	-0.6	528.328	97.31	6475000	9716300	2	F2:29145	MSB60102A.raw	O95372|LYPA2_HUMAN
FLEKLLPPV	4.62	24940.5	16087.9	11075.1	9473.04	11059.8	40.17	1054.64	9	-0.6	528.328	101.49	5888400	1358600	3	F3:28047	MSB66430A.raw	O95372|LYPA2_HUMAN
FLLDALSED	365.91	39294.6	36285.6	33170.5	36821.2	32945.5	38.73	1021.5	9	0	511.756	104.95	289650000	488580000	1	F1:32436	MSB60101A.raw	P20810|ICAL_HUMAN
FLLDALSED	365.91	39294.6	36285.6	33170.5	36821.2	32945.5	33.68	1021.5	9	0.3	511.756	106.02	59413000	33965000	3	F3:29678	MSB66430A.raw	P20810|ICAL_HUMAN
FLLDALSED	365.91	39294.6	36285.6	33170.5	36821.2	32945.5	33.68	1021.5	9	0.3	511.756	106.02	53159000	31895000	3	F3:29678	MSB66430A.raw	P20810|ICAL_HUMAN
FLLDALSEDF	209.99	6144.73	20763.5	22121.9	17388.7	8538.17	47.09	1168.57	10	-0.2	585.29	113.52	103060000	200030000	1	F1:35952	MSB60101A.raw	P20810|ICAL_HUMAN
FLLDALSEDF	209.99	6144.73	20763.5	22121.9	17388.7	8538.17	46.18	1168.57	10	0.8	585.29	113.25	8749100	3771800	3	F3:32514	MSB66430A.raw	P20810|ICAL_HUMAN
FLLDALSEDF	209.99	6144.73	20763.5	22121.9	17388.7	8538.17	46.18	1168.57	10	0.8	585.29	113.25	17740000	5071800	3	F3:32514	MSB66430A.raw	P20810|ICAL_HUMAN
FLLGPRLVLA	24.06	32400.8	13621.8	17558.2	21827.8	17373.2	30.85	1097.7	10	-0.6	549.855	103.73	4427200	6497700	2	F2:31345	MSB60102A.raw	P49755|TMEDA_HUMAN
FLLGPRLVLA	24.06	32400.8	13621.8	17558.2	21827.8	17373.2	32.42	1097.7	10	0.2	549.855	104.94	2879500		1	F1:30393	MSB66428A.raw	P49755|TMEDA_HUMAN
FLNSVGDLL	32.1	10458.8	13593.5	11121.8	2965.27	2784.27	24.7	976.523	9	-0.7	489.268	107.53	4852000		1	F1:31608	MSB66428A.raw	Q6P4A8|PLBL1_HUMAN
FLPQKIIYL	8.97	2783.25	16066.7	23147.4	18.66	108.19	32.34	1133.68	9	-2.3	567.848	98.94	760040		1	F1:27997	MSB66428A.raw	Q9UL46|PSME2_HUMAN
FLPSYIIDV	4.59	11713	30026	16183.4	263.26	1532.06	34.17	1065.57	9	-0.9	533.794	109.68	9892800	5891400	2	F2:33793	MSB60102A.raw	Q10570|CPSF1_HUMAN
FLPSYIIDV	4.59	11713	30026	16183.4	263.26	1532.06	35.61	1065.57	9	-0.6	533.794	109.23	5921300	3384800	1	F1:32273	MSB66428A.raw	Q10570|CPSF1_HUMAN
FLPSYIIDV	4.59	11713	30026	16183.4	263.26	1532.06	35.61	1065.57	9	-0.6	533.794	109.23	4325300	3953500	1	F1:32273	MSB66428A.raw	Q10570|CPSF1_HUMAN
FLRGDSVIVV	92.91	34102.5	13097.6	16778.9	18105.6	5636.43	19.38	1103.63	10	-1.1	552.824	78.34	820150		4	F4:21570	MSB66431A.raw	P62316|SMD2_HUMAN
FLTPPLLSV	4.99	18810.2	11977.4	6863.93	1552.79	1501.8	24.63	985.585	9	-0.5	493.799	110	878530		1	F1:32597	MSB66428A.raw	O95782|AP2A1_HUMAN
FLYPFPLAL	5.38	4961.66	3279.49	3307.65	160.43	41.72	31.64	1079.61	9	-0.5	540.81	116.4	5273000	13397000	1	F1:36916	MSB60101A.raw	Q5BJD5|TM41B_HUMAN
FPQFYPLGI	5744.05	17953.4	315.65	163.53	16880.2	12012.7	28.06	1080.56	9	-0.7	541.289	111.74	2261300	10540000	2	F2:34620	MSB60102A.raw	P35244|RFA3_HUMAN
FPVGRIHRHL	11087.5	27158.8	101.45	4437.12	14198.1	12739.5	23.66	1230.71	10	1.5	411.244	39.35	49483		1	F1:10508	MSB66428A.raw	P0C0S5|H2AZ_HUMAN:Q71UI9|H2AV_HUMAN
FQDDNNLYL	5.11	15173.4	14726.5	13453.2	1655.04	259.78	21.96	1140.51	9	-1.8	571.261	80.11	277020	2234400	2	F2:23291	MSB60102A.raw	Q5VT25|MRCKA_HUMAN
FQDEINWRL	3.33	6452.77	20062.5	8564.18	6855.25	854.93	35.12	1219.6	9	-1.6	610.806	89.99	13784000	54082000	2	F2:26607	MSB60102A.raw	P51784|UBP11_HUMAN
FQDEINWRL	3.33	6452.77	20062.5	8564.18	6855.25	854.93	46.34	1219.6	9	-1.2	610.806	94.95	6806600	4807300	4	F4:25994	MSB66431A.raw	P51784|UBP11_HUMAN
FQDPLPWSV	3.12	9027.25	21999.9	4953.51	8213.33	1138.26	17.14	1087.53	9	-1.6	544.773	108.8	10225000		1	F1:34018	MSB60101A.raw	Q9NP91|S6A20_HUMAN
FQDPLPWSV	3.12	9027.25	21999.9	4953.51	8213.33	1138.26	28.39	1087.53	9	-1.4	544.773	109.18	7096400	7455700	4	F4:31100	MSB66431A.raw	Q9NP91|S6A20_HUMAN
FQDPVPLTV	6.25	13867.9	20908.5	5759.17	5253.59	1144.25	30.64	1014.54	9	0.8	508.277	99.08	1268100	0	2	F2:27322	MSB66429A.raw	O15164|TIF1A_HUMAN
FQDPVPLTV	6.25	13867.9	20908.5	5759.17	5253.59	1144.25	30.64	1014.54	9	0.8	508.277	99.08	175760	7859600	2	F2:27322	MSB66429A.raw	O15164|TIF1A_HUMAN
FQEYVTFL	153.82	21801.6	30236.3	23897.9	15080.4	6134.03	43.31	1045.51	8	0.2	523.763	107.56	10054000	25552000	1	F1:33489	MSB60101A.raw	P06703|S10A6_HUMAN
FQEYVTFL	153.82	21801.6	30236.3	23897.9	15080.4	6134.03	25.34	1045.51	8	-0.1	523.763	108.2	4421400		3	F3:30636	MSB66430A.raw	P06703|S10A6_HUMAN
FQIQFLNSVGDL	80.53	21543	28302.7	29932.3	25509	16298.8	51.15	1379.71	12	-1.2	690.861	111.73	2393800		3	F3:31964	MSB66430A.raw	Q6P4A8|PLBL1_HUMAN
FQIQFLNSVGDL	80.53	21543	28302.7	29932.3	25509	16298.8	51.15	1379.71	12	-1.2	690.861	111.73	2014100		3	F3:31964	MSB66430A.raw	Q6P4A8|PLBL1_HUMAN
FQITEETQI	49.52	21021.2	31881.6	12486.9	16409.8	12361.9	37.88	1107.54	9	-1.1	554.779	81.71	183670	0	3	F3:22613	MSB66430A.raw	P16144|ITB4_HUMAN
FQIVNPHLL	15.82	2501.56	20512.5	10474.3	2673.53	418.92	37.98	1079.61	9	0.5	540.814	96.14	240120	0	2	F2:26459	MSB66429A.raw	P23921|RIR1_HUMAN
FQTTVTAQIL	161.81	21081.3	19715.5	19209.7	10160.6	7831.99	45.13	1120.61	10	1.5	561.314	86.7	9500800		1	F1:25778	MSB60101A.raw	Q9UBQ5|EIF3K_HUMAN
FQTTVTAQIL	161.81	21081.3	19715.5	19209.7	10160.6	7831.99	46.87	1120.61	10	-0.6	561.313	91.7	14826000	2611900	1	F1:25614	MSB66428A.raw	Q9UBQ5|EIF3K_HUMAN
FRVPTANVSV	248.5	27075.2	20557.8	20617.1	1172.22	1498.08	39.02	1088.6	10	0	545.306	69.15	9599900	8815900	2	F2:19950	MSB60102A.raw	P04406|G3P_HUMAN
FRVPTANVSV	248.5	27075.2	20557.8	20617.1	1172.22	1498.08	41.26	1088.6	10	-0.5	545.306	74.69	5317000	566720	1	F1:20781	MSB66428A.raw	P04406|G3P_HUMAN
FRVPTANVSV	248.5	27075.2	20557.8	20617.1	1172.22	1498.08	41.26	1088.6	10	-0.5	545.306	74.69	361110	1744900	1	F1:20781	MSB66428A.raw	P04406|G3P_HUMAN
FSLIAGLTIA	48.74	33274.4	22158.8	14391.8	29246.9	28742.1	37.48	1004.59	10	-0.1	503.303	112.84	52062000	53105000	1	F1:35556	MSB60101A.raw	P60903|S10AA_HUMAN
FSLIAGLTIA	48.74	33274.4	22158.8	14391.8	29246.9	28742.1	38.1	1004.59	10	-1.2	503.302	112.02	26082000	0	2	F2:32223	MSB66429A.raw	P60903|S10AA_HUMAN
FSLIAGLTIA	48.74	33274.4	22158.8	14391.8	29246.9	28742.1	38.1	1004.59	10	-1.2	503.302	112.02	18128000	5225600	2	F2:32223	MSB66429A.raw	P60903|S10AA_HUMAN
FSPLHALNF	7725.69	854.04	21274	22012.6	160.25	567.08	41.21	1044.54	9	0.2	523.277	93.5	52589000	40061000	2	F2:27801	MSB60102A.raw	P68402|PA1B2_HUMAN:Q15102|PA1B3_HUMAN
FSPLHALNF	7725.69	854.04	21274	22012.6	160.25	567.08	46	1044.54	9	-0.7	523.277	98.92	4985700	7176500	3	F3:27319	MSB66430A.raw	P68402|PA1B2_HUMAN:Q15102|PA1B3_HUMAN
FSPLHALNF	7725.69	854.04	21274	22012.6	160.25	567.08	46	1044.54	9	-0.7	523.277	98.92	13312000	3110300	3	F3:27319	MSB66430A.raw	P68402|PA1B2_HUMAN:Q15102|PA1B3_HUMAN
FTFASPTQVF	574.28	270.81	9894.06	14957.7	4755.67	773.36	29.31	1143.56	10	-3.3	572.785	106.83	2127300		1	F1:31268	MSB66428A.raw	P30049|ATPD_HUMAN
FTLDGDIKL	14.77	23418.5	21620.3	15551	4351.92	4623.3	27.99	1020.55	9	0	511.282	94.74	159450		3	F3:26127	MSB66430A.raw	Q9H2G2|SLK_HUMAN
FTLSHITQL	7.88	8739.4	6014.94	11780.1	615.19	439.17	30.46	1058.58	9	0.1	530.295	81.81	1467200	1270800	2	F2:23897	MSB60102A.raw	Q15404|RSU1_HUMAN
FTLSHITQL	7.88	8739.4	6014.94	11780.1	615.19	439.17	33.19	1058.58	9	-1.8	530.294	89.14	1149000		1	F1:24727	MSB66428A.raw	Q15404|RSU1_HUMAN
FTVDKDITL	33.24	22925.8	13716.1	15680.1	747.96	1752.19	25.84	1050.56	9	-0.3	526.287	75.57	1961800	2310800	2	F2:21908	MSB60102A.raw	P33176|KINH_HUMAN
FTVDKDITL	33.24	22925.8	13716.1	15680.1	747.96	1752.19	35.48	1050.56	9	-1.9	526.286	77.95	1445500		4	F4:21427	MSB66431A.raw	P33176|KINH_HUMAN
FTVDKDITL	33.24	22925.8	13716.1	15680.1	747.96	1752.19	35.48	1050.56	9	-1.9	526.286	77.95	44587	725480	4	F4:21427	MSB66431A.raw	P33176|KINH_HUMAN
FVDDYTVRV	5.01	26471.8	20704.5	9223.72	4442.3	2373.44	41.97	1112.55	9	0.9	557.283	67.54	4743700	12182000	2	F2:19515	MSB60102A.raw	O00487|PSDE_HUMAN
FVDDYTVRV	5.01	26471.8	20704.5	9223.72	4442.3	2373.44	49.31	1112.55	9	-0.9	557.282	67.48	1955600	3628400	4	F4:18573	MSB66431A.raw	O00487|PSDE_HUMAN
FVDGLTFKV	3.91	19462.6	22770.1	7244.63	12058.5	7496.69	31.91	1024.56	9	1.3	513.288	86.82	8858300	3238300	1	F1:26281	MSB60101A.raw	Q9HCE1|MOV10_HUMAN
FVDGLTFKV	3.91	19462.6	22770.1	7244.63	12058.5	7496.69	41.02	1024.56	9	0.1	513.287	93.91	746490		3	F3:25893	MSB66430A.raw	Q9HCE1|MOV10_HUMAN
FVDGSAIQV	11.45	31327	19863.6	14097.1	7008.62	8082.77	22.99	934.476	9	-0.7	468.245	74.39	965560		1	F1:20647	MSB66428A.raw	Q9NUQ6|SPS2L_HUMAN
FVDPVLNQL	7.2	16965.9	9138.29	12323.7	1680.57	1291.43	32.19	1043.57	9	0.3	522.79	103.48	1362200		1	F1:29796	MSB66428A.raw	Q15652|JHD2C_HUMAN
FVFPGELLL	8.64	7698.9	11158.9	3294.15	1186.55	524.75	29.64	1033.58	9	-0.9	517.799	115.54	44880000	123190000	1	F1:36541	MSB60101A.raw	Q15758|AAAT_HUMAN
FVFPGELLL	8.64	7698.9	11158.9	3294.15	1186.55	524.75	32.82	1033.58	9	0.2	517.8	115.5	5270300	10398000	4	F4:33491	MSB66431A.raw	Q15758|AAAT_HUMAN
FVFPGELLL	8.64	7698.9	11158.9	3294.15	1186.55	524.75	32.82	1033.58	9	0.2	517.8	115.5	7027900	14807000	4	F4:33491	MSB66431A.raw	Q15758|AAAT_HUMAN
FVHDLVLYL	5.92	14780.3	12400	6373.67	3135.19	365.22	34.38	1117.62	9	1.3	559.817	106.01	4602800		1	F1:30873	MSB66428A.raw	Q00610|CLH1_HUMAN:P53675|CLH2_HUMAN
FVIRNIVEA	6.6	30224.9	13377	12148.6	12368	7070.77	37.08	1059.61	9	-0.1	530.811	74.3	6673700	22806000	2	F2:21473	MSB60102A.raw	P62854|RS26_HUMAN:Q5JNZ5|RS26L_HUMAN
FVIRNIVEA	6.6	30224.9	13377	12148.6	12368	7070.77	42.81	1059.61	9	-0.8	530.811	76.43	3925400	2621300	4	F4:21052	MSB66431A.raw	P62854|RS26_HUMAN:Q5JNZ5|RS26L_HUMAN
FVLPELPSV	2.06	16944.4	14404.7	3528.39	4550.15	3321.09	34.59	999.564	9	-0.3	500.789	109.8	12188000	21370000	1	F1:34387	MSB60101A.raw	P53990|IST1_HUMAN
FVLPVATQI	17.71	11306	16037.5	3945.64	7135.64	5847.01	32.87	986.58	9	2.9	494.299	105.58	168540	2349200	1	F1:32659	MSB60101A.raw	Q99622|C10_HUMAN
FVNDIFERI	8.47	9658.61	23526.1	3670.8	8977.86	3097.86	42.54	1151.6	9	-0.4	576.806	95.37	33851000	103190000	2	F2:28338	MSB60102A.raw	P62807|H2B1C_HUMAN:Q16778|H2B2E_HUMAN:P33778|H2B1B_HUMAN:Q99879|H2B1M_HUMAN:Q93079|H2B1H_HUMAN:P58876|H2B1D_HUMAN:P23527|H2B1O_HUMAN:Q5QNW6|H2B2F_HUMAN:Q99880|H2B1L_HUMAN:Q99877|H2B1N_HUMAN:Q8N257|H2B3B_HUMAN:O60814|H2B1K_HUMAN:P06899|H2B1J_HUMAN:P57053|H2BFS_HUMAN
FVNWINKAL	202.46	23802.1	1150.61	12593.1	2048.56	1937.11	32.72	1103.61	9	-1.5	552.813	95.55	1566200		1	F1:26890	MSB66428A.raw	Q14651|PLSI_HUMAN:P13797|PLST_HUMAN:P13796|PLSL_HUMAN
FVVDEVSNI	10.42	23161.9	20868.2	10794.5	6712.19	6320.79	35.82	1020.51	9	-1.5	511.263	88.44	522940	256460	1	F1:24575	MSB66428A.raw	P63172|DYLT1_HUMAN
FVWSGTAEA	7.38	30888	6152.91	6937.85	10183.6	7013.32	31.9	966.445	9	-1.4	484.229	76.74	229400		1	F1:21233	MSB66428A.raw	Q9UPT9|UBP22_HUMAN
FYHEAVVLF	5640.4	14.25	27057	21176.7	10214.6	38.76	15.08	1123.57	9	-5	562.79	96.3	282290		3	F3:26579	MSB66430A.raw	Q49AM3|TTC31_HUMAN
FYHKYFNYL	2747.37	38.91	19892.9	18981.6	2408.96	19.32	38.15	1293.62	9	-0.6	647.816	76.82	944580	0	2	F2:21305	MSB66429A.raw	Q93063|EXT2_HUMAN
FYHKYFNYL	2747.37	38.91	19892.9	18981.6	2408.96	19.32	38.15	1293.62	9	-0.6	647.816	76.82	438720	0	2	F2:21305	MSB66429A.raw	Q93063|EXT2_HUMAN
FYITSRTQF	18080.7	56.41	16100.8	29092.2	7302.07	25.52	38.4	1161.58	9	-0.7	581.798	71.82	524340	140390	3	F3:19825	MSB66430A.raw	P12931|SRC_HUMAN
FYLEGGFSKF	4019.58	12.43	20451.1	23209.8	18277.6	360.1	39.69	1193.58	10	0.7	597.795	93.22	50008000		1	F1:28008	MSB60101A.raw	Q16828|DUS6_HUMAN
FYLEGGFSKF	4019.58	12.43	20451.1	23209.8	18277.6	360.1	48.02	1193.58	10	-0.3	597.795	98.46	7379200	634950	3	F3:27216	MSB66430A.raw	Q16828|DUS6_HUMAN
FYPAIADLF	7310.93	11.89	26920.3	23362.3	4045.67	90.15	37.56	1055.53	9	-0.1	528.774	113.83	39592000	18178000	2	F2:35459	MSB60102A.raw	Q92791|SC65_HUMAN
FYPAIADLF	7310.93	11.89	26920.3	23362.3	4045.67	90.15	39.59	1055.53	9	-0.8	528.773	113.08	4262000	748410	1	F1:33765	MSB66428A.raw	Q92791|SC65_HUMAN
FYPAIADLF	7310.93	11.89	26920.3	23362.3	4045.67	90.15	39.59	1055.53	9	-0.8	528.773	113.08	3421800	1650400	1	F1:33765	MSB66428A.raw	Q92791|SC65_HUMAN
FYPLDFTF	14730.5	116.03	31175.8	21970.2	13637.1	886.68	41.46	1048.49	8	0.9	525.253	113.97	20166000	27028000	2	F2:35489	MSB60102A.raw	P32119|PRDX2_HUMAN:Q06830|PRDX1_HUMAN:Q13162|PRDX4_HUMAN:P30048|PRDX3_HUMAN
FYPLDFTF	14730.5	116.03	31175.8	21970.2	13637.1	886.68	31.52	1048.49	8	2	525.254	113.8	3947000		3	F3:32716	MSB66430A.raw	Q06830|PRDX1_HUMAN:P32119|PRDX2_HUMAN:Q13162|PRDX4_HUMAN:P30048|PRDX3_HUMAN
FYPLDFTF	14730.5	116.03	31175.8	21970.2	13637.1	886.68	31.52	1048.49	8	2	525.254	113.8	1814500		3	F3:32716	MSB66430A.raw	Q06830|PRDX1_HUMAN:P32119|PRDX2_HUMAN:Q13162|PRDX4_HUMAN:P30048|PRDX3_HUMAN
FYPPKVELF	11585.8	15.34	28451.9	29855	1672.41	43.42	35.34	1138.61	9	0.4	570.311	94.3	63064000	138160000	2	F2:27985	MSB60102A.raw	P22234|PUR6_HUMAN
FYPPKVELF	11585.8	15.34	28451.9	29855	1672.41	43.42	39.18	1138.61	9	-1	570.31	99.36	11734000	22634000	3	F3:27406	MSB66430A.raw	P22234|PUR6_HUMAN
FYPPKVELF	11585.8	15.34	28451.9	29855	1672.41	43.42	39.18	1138.61	9	-1	570.31	99.36	19607000		3	F3:27406	MSB66430A.raw	P22234|PUR6_HUMAN
FYSNIQTVI	7203.43	73.07	19185.8	10133.8	6282.74	104.67	38.96	1083.56	9	-0.6	542.787	93.69	340110	2044700	4	F4:25680	MSB66431A.raw	P24928|RPB1_HUMAN
FYSNIQTVI	7203.43	73.07	19185.8	10133.8	6282.74	104.67	38.96	1083.56	9	-0.6	542.787	93.69	862820	5509500	4	F4:25680	MSB66431A.raw	P24928|RPB1_HUMAN
GFLSELTQQL	241.48	10357	24592.5	28442.7	16090	11417	32.42	1134.59	10	1.1	568.304	110.67	2555000		1	F1:34753	MSB60101A.raw	P14174|MIF_HUMAN
GFLSELTQQL	241.48	10357	24592.5	28442.7	16090	11417	41.46	1134.59	10	-0.6	568.303	110.4	2856800		1	F1:32710	MSB66428A.raw	P14174|MIF_HUMAN
GFLSELTQQL	241.48	10357	24592.5	28442.7	16090	11417	41.46	1134.59	10	-0.6	568.303	110.4	2118000		1	F1:32710	MSB66428A.raw	P14174|MIF_HUMAN
GIYTGFIKV	14.73	29264	29318.8	16726.5	25440.7	20745.3	26	996.564	9	-0.9	499.289	84.07	3701100	7749000	1	F1:24791	MSB60101A.raw	Q86WH2|RASF3_HUMAN
GIYTGFIKV	14.73	29264	29318.8	16726.5	25440.7	20745.3	33.42	996.564	9	-0.3	499.289	91.22	672190	248680	2	F2:25207	MSB66429A.raw	Q86WH2|RASF3_HUMAN
GLIEILKKV	11.96	34187.8	35570.4	23506.5	30745.4	19616.3	36.18	1011.67	9	0.1	338.23	85.83	691310	2294400	2	F2:25108	MSB60102A.raw	O14737|PDCD5_HUMAN
GLLDRLSVL	65.7	24563	8265.3	30534.8	6524.52	5989.16	29.96	984.597	9	0.4	493.306	104.58	3183800	3767000	2	F2:31654	MSB60102A.raw	Q9H0F7|ARL6_HUMAN
GLLGTLVQL	25.69	25487	24445	30554	21774.3	17254.3	22.55	912.564	9	0.8	457.29	111.43	1819400		1	F1:35065	MSB60101A.raw	P35222|CTNB1_HUMAN
GLLGTLVQL	25.69	25487	24445	30554	21774.3	17254.3	23.23	912.564	9	-1.2	457.289	111.78	829570		3	F3:31999	MSB66430A.raw	P35222|CTNB1_HUMAN
GPLPRTVEL	17853.6	36346.9	21.49	7094.53	14418.9	14818.5	29.8	980.565	9	-0.6	491.29	64.83	965730		1	F1:18756	MSB60101A.raw	Q9Y2Q3|GSTK1_HUMAN
GPLPRTVELF	14832.5	3685.41	317.38	10500.5	21870.8	24663.9	36.64	1127.63	10	0.3	564.824	86.7	38154000	8670700	1	F1:25643	MSB60101A.raw	Q9Y2Q3|GSTK1_HUMAN
GPLPRTVELF	14832.5	3685.41	317.38	10500.5	21870.8	24663.9	41.76	1127.63	10	-0.5	564.824	93.05	7081400		1	F1:25977	MSB66428A.raw	Q9Y2Q3|GSTK1_HUMAN
GPRKGREV	42777.5	46036.6	219.13	30544.8	34207.1	39139.8	26.52	897.514	8	-2.2	449.764	10.18	213850		1	F1:2278	MSB66428A.raw	Q07020|RL18_HUMAN
GQDVGRYQV	205.45	28762	28570.1	29836	30307.4	26165.4	34.98	1020.5	9	-0.6	511.256	30.3	2523100	2279000	2	F2:8278	MSB60102A.raw	P51571|SSRD_HUMAN
GQDVGRYQV	205.45	28762	28570.1	29836	30307.4	26165.4	40.48	1020.5	9	-0.8	511.256	37.9	871440	72367	1	F1:10176	MSB66428A.raw	P51571|SSRD_HUMAN
GQDVGRYQV	205.45	28762	28570.1	29836	30307.4	26165.4	40.48	1020.5	9	-0.8	511.256	37.9	143150	140890	1	F1:10176	MSB66428A.raw	P51571|SSRD_HUMAN
GQFGVGFYSA	21.98	23310.5	29980.6	22177.8	39684.3	29918.7	43.87	1031.47	10	-0.1	516.743	84.02	10273000	23512000	2	F2:24567	MSB60102A.raw	P07900|HS90A_HUMAN:P08238|HS90B_HUMAN:Q58FF6|H90B4_HUMAN:Q12931|TRAP1_HUMAN:P14625|ENPL_HUMAN
GQFGVGFYSA	21.98	23310.5	29980.6	22177.8	39684.3	29918.7	45.66	1031.47	10	0.3	516.743	88.41	4638900	3272600	3	F3:24405	MSB66430A.raw	P07900|HS90A_HUMAN:P08238|HS90B_HUMAN:P14625|ENPL_HUMAN:Q58FF6|H90B4_HUMAN:Q12931|TRAP1_HUMAN
GQLDFSEFL	7.25	15479.2	33361.3	21941	20261.3	6808.16	41.21	1054.5	9	-0.6	528.255	111	29676000	52395000	2	F2:34325	MSB60102A.raw	P31949|S10AB_HUMAN
GQLDFSEFL	7.25	15479.2	33361.3	21941	20261.3	6808.16	44.86	1054.5	9	-0.6	528.255	110.9	20273000	18468000	3	F3:31624	MSB66430A.raw	P31949|S10AB_HUMAN
GQLDFSEFL	7.25	15479.2	33361.3	21941	20261.3	6808.16	44.86	1054.5	9	-0.6	528.255	110.9	24152000	0	3	F3:31624	MSB66430A.raw	P31949|S10AB_HUMAN
GQNDIHHKV	29.6	22382.7	32222.8	18324.1	29375	10391	36.53	1046.53	9	-0.8	524.27	12.16	164710		1	F1:2822	MSB66428A.raw	Q9UN86|G3BP2_HUMAN
GQQTLTFEV	12.94	13815.3	28770.5	17972	32522	16049.3	16.17	1021.51	9	-1.3	511.761	86.64	89425		3	F3:23931	MSB66430A.raw	Q8IVF2|AHNK2_HUMAN
GQSELTLLL	22.39	10377	22401.1	17432.7	17067.1	4888.07	29.59	972.549	9	-3	487.28	107.8	2626100	0	2	F2:33024	MSB60102A.raw	Q7L1Q6|BZW1_HUMAN
GQSELTLLL	22.39	10377	22401.1	17432.7	17067.1	4888.07	27.67	972.549	9	0.3	487.282	108.5	3268500	1965800	3	F3:30744	MSB66430A.raw	Q7L1Q6|BZW1_HUMAN
GQSELTLLL	22.39	10377	22401.1	17432.7	17067.1	4888.07	27.67	972.549	9	0.3	487.282	108.5	3844600	2555700	3	F3:30744	MSB66430A.raw	Q7L1Q6|BZW1_HUMAN
GQVGGQVSV	21.59	33262.5	25782.4	24716.2	26831.1	22194.8	36.44	829.429	9	0	415.722	34.57	12447000	6090600	3	F3:9178	MSB66430A.raw	#CONTAM#IPI:CON_IPI00479145.2|SWISS-PROT:P08727:P08727|K1C19_HUMAN
GTVEQIVYL	21.46	25444.2	26240	27637.8	10052.6	8193.36	35.06	1020.55	9	-0.9	511.281	97.32	136420		4	F4:26720	MSB66431A.raw	P52292|IMA1_HUMAN
GTYTGFIKV	17.91	22844.1	29105.5	14776.1	20373.4	16992.3	22.99	984.528	9	2.9	493.273	71.42	169410	1042400	1	F1:20838	MSB60101A.raw	Q8WWW0|RASF5_HUMAN
GVIGGGVFQAI	456.6	33189.5	24423.6	30689.5	35214.3	37138	36.05	1016.57	11	-0.5	509.29	106.3	1353200	3536200	4	F4:29984	MSB66431A.raw	O60830|TI17B_HUMAN
GVIQDFINA	56.32	39356.8	29069.3	29478.8	37747.3	34312	39.43	975.503	9	-0.5	488.758	102.05	4120500	6063400	2	F2:30696	MSB60102A.raw	P78527|PRKDC_HUMAN
GVIQDFINA	56.32	39356.8	29069.3	29478.8	37747.3	34312	37.88	975.503	9	0.3	488.759	104.16	1970500	814630	1	F1:30064	MSB66428A.raw	P78527|PRKDC_HUMAN
GVIQDFINA	56.32	39356.8	29069.3	29478.8	37747.3	34312	37.88	975.503	9	0.3	488.759	104.16	804430	2701800	1	F1:30064	MSB66428A.raw	P78527|PRKDC_HUMAN
GVLDTLTKV	8.49	35949.6	28312.5	21442.8	28550.6	24671.9	27.47	944.554	9	-0.8	473.284	80.73	2123100	4037000	2	F2:23621	MSB60102A.raw	Q99417|MYCBP_HUMAN
GVLKEGFLV	38.37	20924.1	29697.5	17014.2	36229.1	33287.7	32.4	960.564	9	1.7	481.29	86.4	122150		1	F1:23989	MSB66428A.raw	Q9NYT0|PLEK2_HUMAN
GVLKVFLENV	64.43	33709.6	33103.8	25180.8	42083.8	37998.9	46.67	1116.65	10	0.1	559.335	105.28	12331000	9062300	2	F2:31918	MSB60102A.raw	P62805|H4_HUMAN
GVLKVFLENV	64.43	33709.6	33103.8	25180.8	42083.8	37998.9	45.94	1116.65	10	-0.6	559.334	105.64	5885400		1	F1:30733	MSB66428A.raw	P62805|H4_HUMAN
GVLPNIQAV	11.36	29620.4	16202.8	17702.6	11637	12228.8	36.84	909.528	9	-0.3	455.771	86.35	3733800	19715000	2	F2:25303	MSB60102A.raw	P0C0S8|H2A1_HUMAN:Q6FI13|H2A2A_HUMAN:Q93077|H2A1C_HUMAN:P04908|H2A1B_HUMAN:Q7L7L0|H2A3_HUMAN:P20671|H2A1D_HUMAN:Q99878|H2A1J_HUMAN:Q8IUE6|H2A2B_HUMAN:Q9BTM1|H2AJ_HUMAN:Q96KK5|H2A1H_HUMAN:Q16777|H2A2C_HUMAN:P16104|H2AX_HUMAN:Q96QV6|H2A1A_HUMAN
GVLPNIQAV	11.36	29620.4	16202.8	17702.6	11637	12228.8	43.46	909.528	9	-0.9	455.771	90.23	2654200	837860	4	F4:24709	MSB66431A.raw	P04908|H2A1B_HUMAN:Q6FI13|H2A2A_HUMAN:Q7L7L0|H2A3_HUMAN:Q93077|H2A1C_HUMAN:P0C0S8|H2A1_HUMAN:P20671|H2A1D_HUMAN:Q96QV6|H2A1A_HUMAN:Q16777|H2A2C_HUMAN:Q99878|H2A1J_HUMAN:Q96KK5|H2A1H_HUMAN:Q9BTM1|H2AJ_HUMAN:P16104|H2AX_HUMAN:Q8IUE6|H2A2B_HUMAN
GVPTKVFNV	65.13	16029.3	32294.4	30495.5	3160.15	11150	25.39	959.544	9	-1.5	480.779	61.95	1520200		1	F1:17967	MSB60101A.raw	Q16875|F263_HUMAN
GVVARLLAL	97.73	26867.4	1117.58	27459.6	8947.41	9443.97	18.56	910.596	9	-0.8	456.305	93.62	707410	0	4	F4:25622	MSB66431A.raw	Q99536|VAT1_HUMAN
GVVPQLVKL	170.27	29704.5	18440.5	28199.7	17795.8	14833.1	34.03	951.612	9	0.5	476.813	81.3	3337400	10796000	2	F2:23635	MSB60102A.raw	P52292|IMA1_HUMAN
GVVPQLVKL	170.27	29704.5	18440.5	28199.7	17795.8	14833.1	34.71	951.612	9	0.1	476.813	88.81	707430	971960	1	F1:24656	MSB66428A.raw	P52292|IMA1_HUMAN
GVVPTIQKV	75.06	35020.1	28105.9	19606.1	23474	20332.2	21.01	939.575	9	-1.1	470.794	52.79	1335000	831120	2	F2:15043	MSB60102A.raw	Q9BX79|STRA6_HUMAN
GYMEGYYTF	3555.18	3.52	24107.7	23685.8	17313.6	192.06	29.23	1129.44	9	-0.2	565.729	97.83	146180		3	F3:26985	MSB66430A.raw	Q9UK99|FBX3_HUMAN
GYPLWKVTF	26436.9	51.01	32788.3	37104.3	14198.7	869.73	38.92	1109.59	9	-0.9	555.802	101.14	9635900	23831000	1	F1:30992	MSB60101A.raw	P00491|PNPH_HUMAN
GYPLWKVTF	26436.9	51.01	32788.3	37104.3	14198.7	869.73	45.2	1109.59	9	-1.2	555.802	105.25	4394600	3085600	3	F3:29445	MSB66430A.raw	P00491|PNPH_HUMAN
GYPLWKVTF	26436.9	51.01	32788.3	37104.3	14198.7	869.73	45.2	1109.59	9	-1.2	555.802	105.25	2804900	3611800	3	F3:29445	MSB66430A.raw	P00491|PNPH_HUMAN
GYRAFSLSF	21997.8	106.59	14247.4	32079.8	20473.3	461.38	27.1	1046.52	9	-3.3	524.265	89.24	3890400	417390	1	F1:26605	MSB60101A.raw	Q86W42|THOC6_HUMAN
GYRAFSLSF	21997.8	106.59	14247.4	32079.8	20473.3	461.38	32.86	1046.52	9	0	524.266	95.89	2116400	913160	3	F3:26410	MSB66430A.raw	Q86W42|THOC6_HUMAN
GYRAFSLSF	21997.8	106.59	14247.4	32079.8	20473.3	461.38	32.86	1046.52	9	0	524.266	95.89	1832400		3	F3:26410	MSB66430A.raw	Q86W42|THOC6_HUMAN
HLYFETVTI	262.33	10428.8	16007.1	5016.67	6585.94	5422.52	41.92	1121.58	9	-2.1	561.794	95.12	2058800	943210	3	F3:26161	MSB66430A.raw	Q15155|NOMO1_HUMAN:P69849|NOMO3_HUMAN:Q5JPE7|NOMO2_HUMAN
HLYFETVTI	262.33	10428.8	16007.1	5016.67	6585.94	5422.52	41.92	1121.58	9	-2.1	561.794	95.12	2407400	0	3	F3:26161	MSB66430A.raw	Q15155|NOMO1_HUMAN:P69849|NOMO3_HUMAN:Q5JPE7|NOMO2_HUMAN
HPSLIPLFV	6992.78	26317.8	615.55	203.07	29487.7	13382.2	32.84	1021.6	9	0	511.805	107.84	5254800		4	F4:30607	MSB66431A.raw	O00483|NDUA4_HUMAN
HPSLIPLFV	6992.78	26317.8	615.55	203.07	29487.7	13382.2	32.84	1021.6	9	0	511.805	107.84	2733500	6833800	4	F4:30607	MSB66431A.raw	O00483|NDUA4_HUMAN
HYPPVQVLF	15825.3	16.65	25523.7	25185.7	3877.63	67.96	31.55	1098.59	9	0.5	550.301	90.27	267280	676490	4	F4:24717	MSB66431A.raw	P52701|MSH6_HUMAN
IFEAPKDFNF	19782.8	122.69	32184.8	30202	27641.1	8040.29	22.24	1226.6	10	-2.3	614.304	94.74	74896		3	F3:26133	MSB66430A.raw	Q9UG56|PISD_HUMAN
IFIDPGYQTF	5268.96	24.28	19892.9	25940.5	9566.98	771.16	33.65	1199.59	10	0.1	600.8	103.6	4576900	6790600	2	F2:31251	MSB60102A.raw	Q9UBW7|ZMYM2_HUMAN
IFIDPGYQTF	5268.96	24.28	19892.9	25940.5	9566.98	771.16	40.69	1199.59	10	0.1	600.8	105.25	2642900	1811500	3	F3:29446	MSB66430A.raw	Q9UBW7|ZMYM2_HUMAN
IFTDLSSRF	16884.4	133.94	25487.5	25461.9	14737.6	584.95	32.31	1084.56	9	-1	543.284	78.77	5850500	3363200	2	F2:22892	MSB60102A.raw	P13010|XRCC5_HUMAN
IFTDLSSRF	16884.4	133.94	25487.5	25461.9	14737.6	584.95	39.49	1084.56	9	0.1	543.285	83.77	1667100	798650	2	F2:23203	MSB66429A.raw	P13010|XRCC5_HUMAN
IIDDTIFNL	15.33	17398.2	21982.6	18438.7	5058.2	6280.3	34.02	1062.56	9	-0.5	532.287	109.9	6907200	18109000	1	F1:34444	MSB60101A.raw	O15118|NPC1_HUMAN
IIDDTIFNL	15.33	17398.2	21982.6	18438.7	5058.2	6280.3	35.06	1062.56	9	-0.3	532.287	109.94	3522600	6098000	3	F3:31304	MSB66430A.raw	O15118|NPC1_HUMAN
IIIPEIQKV	10.56	19601.2	30455.3	9836.42	11610.6	8772.95	34.11	1051.66	9	-0.6	526.839	84.73	2116900	0	2	F2:23466	MSB66429A.raw	P55060|XPO2_HUMAN
IIIPEIQKV	10.56	19601.2	30455.3	9836.42	11610.6	8772.95	34.11	1051.66	9	-0.6	526.839	84.73	1205700	0	2	F2:23466	MSB66429A.raw	P55060|XPO2_HUMAN
IITDLLRSV	27.28	31204.2	16234.1	11287.5	10493.3	8896.16	31.64	1028.62	9	0	515.319	94.26	11989000	14111000	2	F2:28073	MSB60102A.raw	Q96AE4|FUBP1_HUMAN
IITDLLRSV	27.28	31204.2	16234.1	11287.5	10493.3	8896.16	37.19	1028.62	9	0	515.319	98.31	1800500		3	F3:27113	MSB66430A.raw	Q96AE4|FUBP1_HUMAN
ILFSEGLIKA	62.06	31984.2	32615	21751.2	34758.1	27411.2	36.39	1089.64	10	0.2	545.829	93.58	777370		1	F1:26165	MSB66428A.raw	P42285|MTREX_HUMAN
ILFSEGLIKA	62.06	31984.2	32615	21751.2	34758.1	27411.2	36.39	1089.64	10	0.2	545.829	93.58	71597		1	F1:26165	MSB66428A.raw	P42285|MTREX_HUMAN
ILITGGIVAT	333.51	42042.4	29575.3	37219.3	37209.2	37223.3	22.25	956.591	10	-0.3	479.303	87.11	134810		3	F3:24057	MSB66430A.raw	P13498|CY24A_HUMAN
ILLHLESEL	244.36	22388.7	19096.3	23189.5	7479.27	14092.7	38.72	1065.61	9	-0.5	533.811	92.71	601310		3	F3:25577	MSB66430A.raw	P05783|K1C18_HUMAN
ILLKDILSV	7.02	16931	24927.1	9168.6	14037.1	11437.8	24.96	1012.65	9	0.6	507.334	105.8	5276300	6759700	2	F2:32122	MSB60102A.raw	Q13315|ATM_HUMAN
ILLKDILSV	7.02	16931	24927.1	9168.6	14037.1	11437.8	26.3	1012.65	9	0.2	507.334	105.75	6113900		1	F1:30796	MSB66428A.raw	Q13315|ATM_HUMAN
ILLKDILSV	7.02	16931	24927.1	9168.6	14037.1	11437.8	26.3	1012.65	9	0.2	507.334	105.75	1755500	1672600	1	F1:30796	MSB66428A.raw	Q13315|ATM_HUMAN
ILPPQLALF	869.97	53.33	21715.2	21291.1	229.18	1153.14	33.31	1010.62	9	-1.2	506.315	111.38	8316900	4526900	1	F1:34980	MSB60101A.raw	P35869|AHR_HUMAN
ILTDITKGV	71.32	35174.7	30559.6	18388.1	16926.8	16354.7	32.25	958.57	9	-1.2	480.292	61.22	721720	0	2	F2:17611	MSB60102A.raw	P13639|EF2_HUMAN
IPLPLGTVTI	1995.81	7824.53	396.21	503.39	1465.74	20281.2	33.72	1022.64	10	-1.7	512.325	108.86	1565800	3583500	2	F2:33495	MSB60102A.raw	P50993|AT1A2_HUMAN:P05023|AT1A1_HUMAN
IQDGYLSLL	36.4	10874.5	21257.5	22688.9	4359.03	2836.82	17.34	1020.55	9	-1.2	511.281	108.23	331620		1	F1:31910	MSB66428A.raw	P63241|IF5A1_HUMAN:Q6IS14|IF5AL_HUMAN:Q9GZV4|IF5A2_HUMAN
IQHDLIFSL	9.39	5609	16682.3	9592.37	8276.04	712.06	29.81	1084.59	9	-1.1	543.303	96.48	2097900	12727000	2	F2:28717	MSB60102A.raw	Q16665|HIF1A_HUMAN
IQHDLIFSL	9.39	5609	16682.3	9592.37	8276.04	712.06	38.08	1084.59	9	-0.2	543.303	100.5	2692700	1314100	1	F1:28579	MSB66428A.raw	Q16665|HIF1A_HUMAN
IQHDLIFSL	9.39	5609	16682.3	9592.37	8276.04	712.06	38.08	1084.59	9	-0.2	543.303	100.5	1805300	0	1	F1:28579	MSB66428A.raw	Q16665|HIF1A_HUMAN
IQINVGTTV	21.32	15292	22130.8	12487.1	11678.7	9445.09	28.87	943.534	9	-2.1	472.773	71.31	1664300	1542000	1	F1:20762	MSB60101A.raw	P46379|BAG6_HUMAN
IQINVGTTV	21.32	15292	22130.8	12487.1	11678.7	9445.09	33.2	943.534	9	0.1	472.774	72.94	892730	923670	4	F4:20116	MSB66431A.raw	P46379|BAG6_HUMAN
IQSLSLPVL	178.04	10663.2	17194.1	20179.7	6212.91	5536.58	23.87	968.591	9	-0.5	485.302	110.2	4743000		3	F3:31351	MSB66430A.raw	Q9Y5H8|PCDA3_HUMAN
IQTAVRLLL	107.8	4637.98	11288.5	14670.4	8544	2732.55	22.38	1025.66	9	1	513.838	84.59	308670	1027800	1	F1:25016	MSB60101A.raw	P62807|H2B1C_HUMAN:Q16778|H2B2E_HUMAN:P33778|H2B1B_HUMAN:Q99879|H2B1M_HUMAN:Q93079|H2B1H_HUMAN:P58876|H2B1D_HUMAN:P23527|H2B1O_HUMAN:Q5QNW6|H2B2F_HUMAN:Q99880|H2B1L_HUMAN:Q99877|H2B1N_HUMAN:Q96A08|H2B1A_HUMAN:O60814|H2B1K_HUMAN:P06899|H2B1J_HUMAN:P57053|H2BFS_HUMAN
IQTAVRLLL	107.8	4637.98	11288.5	14670.4	8544	2732.55	29.73	1025.66	9	0.1	513.837	90.98	528540		3	F3:25137	MSB66430A.raw	P62807|H2B1C_HUMAN:Q16778|H2B2E_HUMAN:Q99879|H2B1M_HUMAN:Q93079|H2B1H_HUMAN:Q5QNW6|H2B2F_HUMAN:Q99877|H2B1N_HUMAN:P58876|H2B1D_HUMAN:P33778|H2B1B_HUMAN:P23527|H2B1O_HUMAN:Q99880|H2B1L_HUMAN:Q96A08|H2B1A_HUMAN:O60814|H2B1K_HUMAN:P06899|H2B1J_HUMAN:P57053|H2BFS_HUMAN
IRDNFVIVY	26105.2	29463.2	37641.3	34342.1	38246.4	194.77	31.91	1137.62	9	0.3	569.817	82.3	8671100	5928800	2	F2:24023	MSB60102A.raw	Q9Y6Q5|AP1M2_HUMAN
IRDNFVIVY	26105.2	29463.2	37641.3	34342.1	38246.4	194.77	37.65	1137.62	9	-0.2	569.816	85.87	3382000	3455800	3	F3:23762	MSB66430A.raw	Q9Y6Q5|AP1M2_HUMAN
IRDNFVIVY	26105.2	29463.2	37641.3	34342.1	38246.4	194.77	37.65	1137.62	9	-0.2	569.816	85.87	7668500	5851800	3	F3:23762	MSB66430A.raw	Q9Y6Q5|AP1M2_HUMAN
IRSDTSFMF	11923.2	3650.36	29324.8	21944.3	28668.2	56.93	38.92	1102.51	9	-1.5	552.262	82.98	2694400		1	F1:22998	MSB66428A.raw	P09525|ANXA4_HUMAN
ISPFVGRIL	13378.1	11743.7	14496.6	28672.9	63.11	3761.26	30.19	1000.61	9	0.1	501.311	85.3	5972100	6186400	1	F1:25249	MSB60101A.raw	P37837|TALDO_HUMAN
ISPFVGRIL	13378.1	11743.7	14496.6	28672.9	63.11	3761.26	38.03	1000.61	9	-0.1	501.311	92.95	4298100		1	F1:25898	MSB66428A.raw	P37837|TALDO_HUMAN
ITLEDLEQL	45.8	16621.7	30117.5	21785.6	12385	13657.9	35.78	1072.57	9	-0.6	537.29	109.06	9618100	46265000	2	F2:33525	MSB60102A.raw	Q15121|PEA15_HUMAN
ITLEDLEQL	45.8	16621.7	30117.5	21785.6	12385	13657.9	30.18	1072.57	9	1.3	537.291	108.59	3868600	3383000	1	F1:32045	MSB66428A.raw	Q15121|PEA15_HUMAN
ITPENLPQI	58.55	2878	28655.2	17483.9	145.02	3843.42	24.42	1023.56	9	-0.1	512.787	81.45	440540	2080000	2	F2:23687	MSB60102A.raw	P43243|MATR3_HUMAN
ITVEKIIKI	233.13	11374.9	30169.7	13345.9	9548.26	11107.5	27.92	1055.7	9	-0.9	528.855	70.11	1066500	1542000	1	F1:20391	MSB60101A.raw	Q15149|PLEC_HUMAN
ITVEKIIKI	233.13	11374.9	30169.7	13345.9	9548.26	11107.5	25.52	1055.7	9	-0.9	528.855	70.63	102250	621360	4	F4:19398	MSB66431A.raw	Q15149|PLEC_HUMAN
IVIGIIKTV	21.56	23112.6	21526.7	9364	14215.5	10391.2	21.7	954.648	9	0	478.331	81.79	1212300	0	2	F2:23856	MSB60102A.raw	Q02153|GCYB1_HUMAN
IVIGVLHQL	11.94	5595.66	10601.4	13569	6467.45	4064.49	27.49	990.623	9	0.7	496.319	84.02	1079600	9776300	2	F2:24538	MSB60102A.raw	Q9UH92|MLX_HUMAN
IVTEIISEI	41.72	15021.3	17972.8	7157.83	6253.38	7819.37	22.67	1015.58	9	-1.5	508.796	104.87	865150		1	F1:30396	MSB66428A.raw	Q9BPX3|CND3_HUMAN
IYAPPLPSL	3446.55	69.68	9956.77	21932.5	865.05	70.67	29.43	969.553	9	0.2	485.784	102.05	13955000	21923000	2	F2:30804	MSB60102A.raw	Q92667|AKAP1_HUMAN
IYAPPLPSL	3446.55	69.68	9956.77	21932.5	865.05	70.67	27.53	969.553	9	-0.5	485.784	104.96	3241100	2619700	3	F3:29346	MSB66430A.raw	Q92667|AKAP1_HUMAN
IYAPPLPSL	3446.55	69.68	9956.77	21932.5	865.05	70.67	27.53	969.553	9	-0.5	485.784	104.96	1727600	8624300	3	F3:29346	MSB66430A.raw	Q92667|AKAP1_HUMAN
IYDKFIAQL	4492.53	251.78	20227.6	24401.1	4567.02	177.82	39.51	1109.61	9	0.5	555.814	90.78	778210	624030	3	F3:25016	MSB66430A.raw	Q6P1K2|PMF1_HUMAN
IYDSVKVYF	10127.5	99.74	22999.6	27708.2	13100.1	238.07	34.36	1132.58	9	-1.1	567.297	81.48	4508200	486900	2	F2:23765	MSB60102A.raw	Q00325|MPCP_HUMAN
IYDSVKVYF	10127.5	99.74	22999.6	27708.2	13100.1	238.07	43.48	1132.58	9	-0.6	567.297	85.41	2766200	0	4	F4:23430	MSB66431A.raw	Q00325|MPCP_HUMAN
IYFEYSHAF	3601.44	6.41	16726.9	14924.9	3875.61	14.35	37.41	1175.53	9	0.2	588.772	88.85	175780	453300	1	F1:24728	MSB66428A.raw	P20585|MSH3_HUMAN
IYGLLKNPF	30410.9	41.18	24873.2	34154.9	23265.2	1748.74	39.23	1063.61	9	0.4	532.811	92.74	2162100	3026700	2	F2:27480	MSB60102A.raw	Q96TA2|YMEL1_HUMAN
IYGSVWEKL	19873.5	20.13	31085.5	28659.5	19406.9	1687.64	33.08	1093.58	9	0.4	547.798	86.31	354410	913930	4	F4:23621	MSB66431A.raw	Q96LT4|SAMD8_HUMAN
IYGYVAEQF	24200	7.28	34855.3	28972.2	25395.6	730.55	33.37	1088.52	9	-1	545.266	84.64	10054000	24921000	1	F1:25295	MSB60101A.raw	Q9Y6A9|SPCS1_HUMAN
IYGYVAEQF	24200	7.28	34855.3	28972.2	25395.6	730.55	43.2	1088.52	9	0.1	545.266	88.09	10481000	1697100	3	F3:24333	MSB66430A.raw	Q9Y6A9|SPCS1_HUMAN
IYGYVAEQF	24200	7.28	34855.3	28972.2	25395.6	730.55	43.2	1088.52	9	0.1	545.266	88.09	3564500	12086000	3	F3:24333	MSB66430A.raw	Q9Y6A9|SPCS1_HUMAN
IYIKHPHLF	15781.4	4.17	25361.5	22788.8	9442.03	26.87	34.45	1166.66	9	-0.2	584.337	65.7	263860		1	F1:18126	MSB66428A.raw	Q9H147|TDIF1_HUMAN
IYKWITDNF	27214.7	11.83	30842	28326.6	23655.8	374.29	45.4	1198.6	9	-2.4	600.307	97.21	2578800	850750	4	F4:26635	MSB66431A.raw	Q92949|FOXJ1_HUMAN
IYLPYLHEW	14438.9	9.69	32614.3	18204.6	21556.5	1144.69	31.84	1232.62	9	-1.4	617.318	107.22	1336100	2704700	4	F4:30391	MSB66431A.raw	Q99816|TS101_HUMAN
IYLPYLQNW	22397	16.45	36880.9	22037.6	25956.5	2545.18	38.93	1208.62	9	-0.2	605.319	111.92	1476500	1432800	3	F3:32036	MSB66430A.raw	Q8IX04|UEVLD_HUMAN
IYPTTYVQF	20426.2	12.59	30264.5	31681.4	3061.67	129.23	32.23	1130.56	9	-0.1	566.29	93.71	1906200	0	1	F1:28311	MSB60101A.raw	Q96S97|MYADM_HUMAN
IYPTTYVQF	20426.2	12.59	30264.5	31681.4	3061.67	129.23	31.47	1130.56	9	-1.5	566.289	97.46	492840		1	F1:27512	MSB66428A.raw	Q96S97|MYADM_HUMAN
IYPTTYVQF	20426.2	12.59	30264.5	31681.4	3061.67	129.23	31.47	1130.56	9	-1.5	566.289	97.46	1484300		1	F1:27512	MSB66428A.raw	Q96S97|MYADM_HUMAN
IYPVNAISF	20850	22.57	25231	30694.2	1501.28	120.71	27.74	1022.54	9	1.6	512.28	102.38	1571700	2939400	1	F1:31414	MSB60101A.raw	O43684|BUB3_HUMAN
IYQRDPLKL	28722.2	80.15	30538.8	32008.1	16422.6	849.46	35.79	1144.66	9	-0.6	573.337	50.81	15970000	9226100	1	F1:14473	MSB60101A.raw	P42226|STAT6_HUMAN
IYQRDPLKL	28722.2	80.15	30538.8	32008.1	16422.6	849.46	37.02	1144.66	9	-0.9	382.56	59.27	6037000		1	F1:16171	MSB66428A.raw	P42226|STAT6_HUMAN
IYQRDPLKL	28722.2	80.15	30538.8	32008.1	16422.6	849.46	37.02	1144.66	9	-0.9	382.56	59.27	564320	333330	1	F1:16171	MSB66428A.raw	P42226|STAT6_HUMAN
IYTKIMDLI	10916.3	21.48	34636.1	14708.2	24306	3485.89	38	1108.62	9	-1.3	555.317	103.4	792080		1	F1:29771	MSB66428A.raw	Q2PZI1|D19L1_HUMAN
IYTSSVNRL	20510.3	105.47	27579.9	29920.3	5651.76	205.99	18.19	1051.57	9	0.2	526.79	49.19	107040		1	F1:13336	MSB66428A.raw	P35606|COPB2_HUMAN
IYVHDLLTF	13900.9	10.62	31991.1	27606.5	19294.7	435.35	42.05	1119.6	9	-0.1	560.805	105.01	7389300		3	F3:29328	MSB66430A.raw	Q96JC1|VPS39_HUMAN
IYVHDLLTF	13900.9	10.62	31991.1	27606.5	19294.7	435.35	42.05	1119.6	9	-0.1	560.805	105.01	3034500		3	F3:29328	MSB66430A.raw	Q96JC1|VPS39_HUMAN
IYVPEAQTRL	9899.3	253.95	25340.4	31467.2	840.33	1484.38	40.14	1188.65	10	-0.7	595.332	62.91	15487000	14365000	1	F1:18242	MSB60101A.raw	Q9Y2H0|DLGP4_HUMAN
IYVPVSLGF	9379.92	13.56	26412.6	22329.4	15967.4	177.34	36.14	993.553	9	1.4	497.785	109.35	3496600	6321800	1	F1:34219	MSB60101A.raw	O14753|OVOL1_HUMAN
IYVPVSLGF	9379.92	13.56	26412.6	22329.4	15967.4	177.34	34.35	993.553	9	-0.3	497.784	109.7	733920		3	F3:31200	MSB66430A.raw	O14753|OVOL1_HUMAN
IYVPVSLGF	9379.92	13.56	26412.6	22329.4	15967.4	177.34	34.35	993.553	9	-0.3	497.784	109.7	1574600		3	F3:31200	MSB66430A.raw	O14753|OVOL1_HUMAN
KFIDNTLYF	2988.59	22.71	21115.1	24072.5	6711.76	120.81	39.35	1159.59	9	-0.7	580.803	89.46	3046200	7757300	2	F2:26242	MSB60102A.raw	Q14116|IL18_HUMAN
KFIDNTLYF	2988.59	22.71	21115.1	24072.5	6711.76	120.81	44.88	1159.59	9	-0.3	580.803	93.13	1838300	368550	4	F4:25489	MSB66431A.raw	Q14116|IL18_HUMAN
KFIDNTLYF	2988.59	22.71	21115.1	24072.5	6711.76	120.81	44.88	1159.59	9	-0.3	580.803	93.13	1522600	924220	4	F4:25489	MSB66431A.raw	Q14116|IL18_HUMAN
KFIDTTSKF	11079.9	70.39	19908.2	29956	11991.3	586.31	36.32	1085.58	9	0.3	543.795	44.6	5304300	12342000	2	F2:12438	MSB60102A.raw	P39023|RL3_HUMAN:Q92901|RL3L_HUMAN
KFIDTTSKF	11079.9	70.39	19908.2	29956	11991.3	586.31	40.2	1085.58	9	-1.1	543.794	44.55	1633000	691470	2	F2:12035	MSB66429A.raw	P39023|RL3_HUMAN:Q92901|RL3L_HUMAN
KFIDTTSKF	11079.9	70.39	19908.2	29956	11991.3	586.31	40.2	1085.58	9	-1.1	543.794	44.55	130690	1068300	2	F2:12035	MSB66429A.raw	P39023|RL3_HUMAN:Q92901|RL3L_HUMAN
KGPGSTKEL	25048.7	27688.4	19943.5	40214.7	233.55	16288.1	12.82	915.503	9	0.2	458.759	12.55	69733		1	F1:2981	MSB60101A.raw	Q13123|RED_HUMAN
KIFDEILVNA	54.82	31707.8	30524	24978.4	34688.2	27941.2	44.65	1160.64	10	-1	581.329	91.71	1064500	2439400	4	F4:25059	MSB66431A.raw	P11388|TOP2A_HUMAN:Q02880|TOP2B_HUMAN
KILPTLEAV	5.43	22894.1	12758	13801	14467.2	18288.3	23.35	982.606	9	-1	492.31	74.65	167950	876290	2	F2:21602	MSB60102A.raw	Q12905|ILF2_HUMAN
KIPVSAFLL	395.07	580.74	16646.2	24515.4	202.77	5536.34	24.81	986.616	9	-0.3	494.315	97.28	1779100	481840	1	F1:29582	MSB60101A.raw	O95994|AGR2_HUMAN
KIYEGQVEV	6.53	26429.4	13918	11831.7	4413.47	6436.45	25.1	1063.55	9	0.1	532.785	45.22	516180	3096000	2	F2:12762	MSB60102A.raw	P46777|RL5_HUMAN
KQALKYFNL	104.96	1629.01	20927.3	28199.4	13284.5	7283.37	22.44	1123.64	9	1.6	562.828	73.9	163070		1	F1:20513	MSB66428A.raw	Q9UBV2|SE1L1_HUMAN
KQLDDLKVEL	47.95	25658.2	25760.6	33341.8	20071.2	19635.8	37.73	1199.68	10	-0.6	600.845	65.66	2872800	10071000	2	F2:18906	MSB60102A.raw	P42766|RL35_HUMAN
KQVEEIFNL	3.5	4073.52	29659.2	18925.8	17449.7	5113.17	37.2	1118.6	9	0.1	560.306	81.65	8452500	9416300	2	F2:23758	MSB60102A.raw	P78347|GTF2I_HUMAN
KQVEEIFNL	3.5	4073.52	29659.2	18925.8	17449.7	5113.17	41.24	1118.6	9	-1	560.305	86.1	4390400		4	F4:23573	MSB66431A.raw	P78347|GTF2I_HUMAN
KRGDVIYIL	6875.6	12063.4	28464.8	28011.1	31778.2	287.98	21.58	1075.64	9	-0.7	538.826	68.5	2133200	2026800	1	F1:19917	MSB60101A.raw	O75563|SKAP2_HUMAN
KVLDFEHFL	8.38	8686.71	20779	15637.7	9133.36	5364.57	39.96	1146.61	9	-0.2	574.311	98.72	474790	4562900	2	F2:27290	MSB66429A.raw	P60660|MYL6_HUMAN
KVLNNMEIGTSL	497.78	26572	3228.76	32265.7	17808.9	27322.4	42.99	1317.7	12	-2.1	659.854	78.53	4409000	0	1	F1:21726	MSB66428A.raw	P00558|PGK1_HUMAN
KVLNNMEIGTSL	497.78	26572	3228.76	32265.7	17808.9	27322.4	42.99	1317.7	12	-2.1	659.854	78.53	367490	225110	1	F1:21726	MSB66428A.raw	P00558|PGK1_HUMAN
KVLPGVDALSNI	306.68	22032.1	24030.1	21589.2	24862.7	34948.6	45.07	1224.71	12	-0.1	613.361	84.92	84188000	127890000	2	F2:24771	MSB60102A.raw	P00558|PGK1_HUMAN
KVLPGVDALSNI	306.68	22032.1	24030.1	21589.2	24862.7	34948.6	51.55	1224.71	12	-0.7	613.361	88.87	40640000	14146000	4	F4:24419	MSB66431A.raw	P00558|PGK1_HUMAN
KVLPGVDALSNI	306.68	22032.1	24030.1	21589.2	24862.7	34948.6	51.55	1224.71	12	-0.7	613.361	88.87	14711000	16087000	4	F4:24419	MSB66431A.raw	P00558|PGK1_HUMAN
KVPEIEVTV	34.26	14142.2	26524	17988.8	615.46	8977.57	34.71	1012.58	9	-0.7	507.297	69.35	442300	782270	3	F3:19150	MSB66430A.raw	P78347|GTF2I_HUMAN
KVSLPKLANVQL	7117.21	32007	409.57	28516.9	22022.6	31427.4	44.51	1308.81	12	-0.1	437.278	79.55	4081800	1727700	1	F1:23324	MSB60101A.raw	P68402|PA1B2_HUMAN
KVSLPKLANVQL	7117.21	32007	409.57	28516.9	22022.6	31427.4	43.81	1308.81	12	0.1	437.278	87.36	6290600	0	1	F1:24296	MSB66428A.raw	P68402|PA1B2_HUMAN
KVVEDGILKL	424.89	28281.9	19556.5	30642.1	22768.3	24829.1	25.65	1112.68	10	-0.2	557.347	64.98	1636200	1588900	2	F2:18734	MSB60102A.raw	P35221|CTNA1_HUMAN
KVVEDGILKL	424.89	28281.9	19556.5	30642.1	22768.3	24829.1	19.74	1112.68	10	-1.7	557.347	72.02	566810		1	F1:19949	MSB66428A.raw	P35221|CTNA1_HUMAN
KWNPTAGVAF	22593.9	187.4	19304.7	36428.1	11103.6	6819.88	33.17	1089.56	10	0.9	545.788	74.6	8238900	13501000	2	F2:21570	MSB60102A.raw	P19387|RPB3_HUMAN
KWNPTAGVAF	22593.9	187.4	19304.7	36428.1	11103.6	6819.88	43.7	1089.56	10	0	545.788	77.15	3669500	1143600	4	F4:21271	MSB66431A.raw	P19387|RPB3_HUMAN
KWNPTAGVAF	22593.9	187.4	19304.7	36428.1	11103.6	6819.88	43.7	1089.56	10	0	545.788	77.15	271520	3473400	4	F4:21271	MSB66431A.raw	P19387|RPB3_HUMAN
KYEELFPAF	10948.1	36.56	22423.1	30472.8	12178.9	499.97	31.74	1142.56	9	-2.4	572.288	96.47	2456500	11067000	2	F2:28885	MSB60102A.raw	P54920|SNAA_HUMAN
KYFSLPSVVF	13846.9	17.86	21328.9	25103.5	16496.3	673.52	39.85	1185.64	10	-1.2	593.828	106.85	5286400	1871000	2	F2:32589	MSB60102A.raw	O60656|UD19_HUMAN:Q9HAW9|UD18_HUMAN:Q9HAW8|UD110_HUMAN:Q9HAW7|UD17_HUMAN
KYGPVFSF	23025	33.72	31917.8	33009.8	28330.9	2712.17	29.15	943.48	8	-0.2	472.747	80.4	2300900	8409900	1	F1:23596	MSB60101A.raw	Q16850|CP51A_HUMAN
KYGPVFSF	23025	33.72	31917.8	33009.8	28330.9	2712.17	31.49	943.48	8	-0.2	472.747	88.19	2590300		1	F1:24480	MSB66428A.raw	Q16850|CP51A_HUMAN
KYGPVFSF	23025	33.72	31917.8	33009.8	28330.9	2712.17	31.49	943.48	8	-0.2	472.747	88.19	143900		1	F1:24480	MSB66428A.raw	Q16850|CP51A_HUMAN
KYISKPENL	20253	139.82	30032.5	36176.7	11949.3	779.45	24.92	1090.6	9	-1.1	546.308	29.27	407750	591980	1	F1:7910	MSB60101A.raw	Q9H9S4|CB39L_HUMAN:Q9Y376|CAB39_HUMAN
KYLSVQGQLF	15940.1	7.82	26799.8	28562	26531.1	2025.79	39.72	1181.64	10	-0.2	591.829	78.14	15551000	51632000	2	F2:22790	MSB60102A.raw	Q9NZJ7|MTCH1_HUMAN
KYLSVQGQLF	15940.1	7.82	26799.8	28562	26531.1	2025.79	48.62	1181.64	10	0.2	591.83	81.85	8852200	0	4	F4:22559	MSB66431A.raw	Q9NZJ7|MTCH1_HUMAN
KYLSVQGQLF	15940.1	7.82	26799.8	28562	26531.1	2025.79	48.62	1181.64	10	0.2	591.83	81.85	5537800	33276000	4	F4:22559	MSB66431A.raw	Q9NZJ7|MTCH1_HUMAN
KYMDVQFDF	5175.79	5.79	25674.3	20468.4	20803.3	195.98	43.01	1191.53	9	0.3	596.771	95.67	2776500	6247500	4	F4:26206	MSB66431A.raw	O00159|MYO1C_HUMAN
KYMDVQFDF	5175.79	5.79	25674.3	20468.4	20803.3	195.98	43.01	1191.53	9	0.3	596.771	95.67	6261200	0	4	F4:26206	MSB66431A.raw	O00159|MYO1C_HUMAN
KYNANFVTF	11413.5	5.55	19844.5	26607.3	8360.46	77.4	39.64	1102.54	9	0.8	552.28	79.53	530580		1	F1:22071	MSB66428A.raw	Q9Y2K7|KDM2A_HUMAN
KYNDNFFGL	2041.21	54.91	25749.7	27453.4	7974.7	155.74	35.69	1116.52	9	-0.9	559.269	89.53	982770	6542000	2	F2:26327	MSB60102A.raw	Q8N806|UBR7_HUMAN
KYNDNFFGL	2041.21	54.91	25749.7	27453.4	7974.7	155.74	42.7	1116.52	9	-0.6	559.269	95.52	1570700	6565300	4	F4:26083	MSB66431A.raw	Q8N806|UBR7_HUMAN
KYPENFFLL	1252.17	5.26	23531	21942.4	571.17	58.33	34.62	1169.61	9	0.3	585.813	106.69	26416000	126930000	2	F2:32377	MSB60102A.raw	P62136|PP1A_HUMAN:P36873|PP1G_HUMAN:P62140|PP1B_HUMAN
KYPSPFFVF	10925.2	4.65	23502.2	27193.5	2208.55	97.45	33.9	1130.58	9	-0.5	566.297	107.23	82635000	192480000	2	F2:32858	MSB60102A.raw	Q08211|DHX9_HUMAN
KYPSPFFVF	10925.2	4.65	23502.2	27193.5	2208.55	97.45	32.78	1130.58	9	0.9	566.298	106.88	18806000	12659000	1	F1:31319	MSB66428A.raw	Q08211|DHX9_HUMAN
KYQEVTNNL	8360.19	35.79	19221.1	29073.4	6720.7	366.65	29.26	1107.56	9	0.7	554.786	35.25	592070	666330	1	F1:9685	MSB60101A.raw	Q14444|CAPR1_HUMAN
KYTKIFNDF	24558.2	11.36	31732.2	34052	24223	995.39	38.75	1174.6	9	-2.1	588.307	65.22	2470900	3814800	2	F2:18773	MSB60102A.raw	Q15326|ZMY11_HUMAN
KYTKIFNDF	24558.2	11.36	31732.2	34052	24223	995.39	45.99	1174.6	9	0.1	588.308	64.39	2260500	516150	4	F4:17752	MSB66431A.raw	Q15326|ZMY11_HUMAN
KYTPPPHHI	17844.9	87.86	29382	25957	11863.4	1980.5	25.74	1088.58	9	-0.7	545.295	15.53	89050		1	F1:3837	MSB60101A.raw	O43920|NDUS5_HUMAN
LAAHIPLFL	254.36	12843.6	7990.51	4395.35	3644.72	2845.27	18.02	993.601	9	-0.8	497.807	104.77	1530900	0	2	F2:31757	MSB60102A.raw	Q92600|CNOT9_HUMAN
LAPNIISQL	1443.97	13485.7	12171.3	14906.2	44.29	1650.57	31.3	967.57	9	0	484.792	96.3	8870700	0	1	F1:29318	MSB60101A.raw	P30044|PRDX5_HUMAN
LAPNIISQL	1443.97	13485.7	12171.3	14906.2	44.29	1650.57	25.99	967.57	9	-1.4	484.792	100.35	3010300	0	1	F1:28563	MSB66428A.raw	P30044|PRDX5_HUMAN
LAVDYGSYI	286.23	25198.2	13010.3	3711.62	2806.56	6111.17	14.04	999.491	9	-6.9	500.75	58.45	40535000	84022000	1	F1:17440	MSB60101A.raw	Q9HC58|NCKX3_HUMAN
LDLIPSLSPT	165.59	40206.4	25274.2	31005.3	36305.7	36596.7	20.17	1054.59	10	-1.8	528.302	106.24	1218000		1	F1:30976	MSB66428A.raw	Q6P4A8|PLBL1_HUMAN
LDMDSIIAEV	78.65	26352.1	23669.9	13991.8	21439.5	24533.7	21.52	1104.54	10	-1.1	553.275	110.19	221640		3	F3:31380	MSB66430A.raw	P05787|K2C8_HUMAN:#CONTAM#IPI:CON_IPI00554648.3|SWISS-PROT:P05787:#CONTAM#IPI:CON_IPI00787323.2|H-INV:HIT000292931:#CONTAM#IPI:CON_IPI00748057.2|H-INV:HIT000016045
LFAVFQTTF	15808	76.51	25808.9	22133.2	15308.1	1814.41	36.28	1072.56	9	-0.3	537.287	111.15	3534500	5361500	2	F2:34355	MSB60102A.raw	Q99650|OSMR_HUMAN
LFAVFQTTF	15808	76.51	25808.9	22133.2	15308.1	1814.41	39.53	1072.56	9	-1.3	537.286	111.18	2675300	880210	3	F3:31760	MSB66430A.raw	Q99650|OSMR_HUMAN
LILDPIFKV	5.58	21063.6	29294.4	6914.76	22695	14149.4	18.68	1056.66	9	1.8	529.337	106.46	1194200		1	F1:31158	MSB66428A.raw	P13639|EF2_HUMAN
LITDLLNEA	85.51	41220.9	25995.5	18752.7	31713.3	25925.3	22.65	1000.54	9	-1.6	501.279	103.24	71621		1	F1:29681	MSB66428A.raw	P36543|VATE1_HUMAN
LIWPWFERL	57.86	5555.72	16809.8	7530.83	10966.6	8604.39	37.2	1258.69	9	-0.6	630.35	112.1	17843000	28268000	2	F2:34779	MSB60102A.raw	P78417|GSTO1_HUMAN
LIWPWFERL	57.86	5555.72	16809.8	7530.83	10966.6	8604.39	38.4	1258.69	9	-0.4	630.35	110.92	6696800		1	F1:32918	MSB66428A.raw	P78417|GSTO1_HUMAN
LKNSPLVSRLTL	23274.7	32638.3	162.86	10153.5	21590.8	19898	50.4	1339.82	12	-0.7	670.916	79.23	533900		1	F1:21973	MSB66428A.raw	P40926|MDHM_HUMAN
LLAEAGVRL	87.11	18020.3	8631.8	20749.8	1977.52	6808.23	41.23	940.571	9	0.6	471.293	74.09	290560		1	F1:20526	MSB66428A.raw	O43175|SERA_HUMAN
LLDRFLATV	14.32	20839.8	24049.3	13025.6	7990.85	13587.9	18.19	1046.61	9	-0.7	524.313	97.38	1786900		3	F3:26861	MSB66430A.raw	Q14094|CCNI_HUMAN
LLGPRLVLA	127.74	30461.3	24977.8	18308.7	24378.9	16790.7	21.91	950.628	9	0.6	476.321	79.52	23509000	0	1	F1:23401	MSB60101A.raw	P49755|TMEDA_HUMAN
LLGPRLVLA	127.74	30461.3	24977.8	18308.7	24378.9	16790.7	28.15	950.628	9	-0.6	476.321	84.19	6872500	186410	4	F4:23117	MSB66431A.raw	P49755|TMEDA_HUMAN
LLGPRLVLA	127.74	30461.3	24977.8	18308.7	24378.9	16790.7	28.15	950.628	9	-0.6	476.321	84.19	827960	2679400	4	F4:23117	MSB66431A.raw	P49755|TMEDA_HUMAN
LLIENVASL	12.02	10977.1	6921.95	15773.5	438.81	1117.47	32.34	970.57	9	-0.1	486.292	103.76	46109000	342700000	1	F1:31932	MSB60101A.raw	P07203|GPX1_HUMAN
LLIENVASL	12.02	10977.1	6921.95	15773.5	438.81	1117.47	34.89	970.57	9	-0.7	486.292	105.84	33443000	39889000	2	F2:29670	MSB66429A.raw	P07203|GPX1_HUMAN
LLLAQLSDA	261.8	40187.2	28351.1	27129.1	35095.6	34219.3	29.11	942.539	9	-1	472.276	91.67	1004500	0	2	F2:27105	MSB60102A.raw	Q9NQ34|TMM9B_HUMAN
LLLDVPTAAV	20.07	32520.5	15648.4	14074.2	16471.2	23048.9	25.56	1010.6	10	0.2	506.308	102.57	352030	4718700	2	F2:30931	MSB60102A.raw	P13284|GILT_HUMAN
LLPEHFLFL	8.72	586.18	14437.5	14558.5	20.66	223.86	27.1	1127.64	9	0.1	564.826	110.12	3599900	5373800	2	F2:33984	MSB60102A.raw	P42226|STAT6_HUMAN
LLPNHSYVF	1679.47	50.14	13419.3	20315.5	161.22	414.11	20.91	1088.57	9	-3.5	545.288	78.06	819570		1	F1:21618	MSB66428A.raw	P16144|ITB4_HUMAN
LLWPWFERL	25.55	3804.52	20810.8	7217.95	9594.97	5966.2	37.2	1258.69	9	-0.6	630.35	112.1	17843000	28268000	2	F2:34779	MSB60102A.raw	Q9H4Y5|GSTO2_HUMAN
LLWPWFERL	25.55	3804.52	20810.8	7217.95	9594.97	5966.2	38.4	1258.69	9	-0.4	630.35	110.92	6696800		1	F1:32918	MSB66428A.raw	Q9H4Y5|GSTO2_HUMAN
LPALLPVPAV	592.49	34848.5	252.98	644.04	25817.5	28426.7	41.91	988.632	10	-1	495.323	109.11	474290		1	F1:34120	MSB60101A.raw	O95407|TNF6B_HUMAN
LPETLNQPL	19900.8	38210	91.36	4663.6	20644.8	22741.5	15	1023.56	9	-0.5	512.787	81.48	440540		1	F1:23971	MSB60101A.raw	Q8TCC7|S22A8_HUMAN
LPHPIIVSI	9211.26	22814.2	112.05	151.28	16253.8	11649.8	27.64	987.612	9	2.7	494.815	83.27	1435300	1525200	1	F1:24561	MSB60101A.raw	O95759|TBCD8_HUMAN
LQDAFHISL	37.45	12558.6	11963.9	16009.2	4200.91	3091.87	31.88	1042.54	9	-0.5	522.279	95.09	559890		1	F1:26615	MSB66428A.raw	Q8N5H3|LRA25_HUMAN
LQEETTVSL	179.12	24040.2	12612.5	21941.2	6495.22	7380.31	17.09	1018.52	9	1	510.267	61.7	493340	0	1	F1:17748	MSB60101A.raw	Q2TAY7|SMU1_HUMAN
LQEETTVSL	179.12	24040.2	12612.5	21941.2	6495.22	7380.31	21.13	1018.52	9	-1	510.266	63.62	471900	480750	3	F3:17556	MSB66430A.raw	Q2TAY7|SMU1_HUMAN
LQIQQGLQTL	184.18	16095.4	12200.4	24101.2	14437.9	16012.2	34.73	1140.65	10	0.1	571.332	83.76	2402000	2976600	2	F2:24491	MSB60102A.raw	Q9UMX0|UBQL1_HUMAN:Q9NRR5|UBQL4_HUMAN
LQIQQGLQTL	184.18	16095.4	12200.4	24101.2	14437.9	16012.2	38.39	1140.65	10	-2.8	571.331	89.28	1171300	212980	1	F1:24795	MSB66428A.raw	Q9UMX0|UBQL1_HUMAN:Q9NRR5|UBQL4_HUMAN
LQMEPAAFQAL	40.14	11841.1	10167.4	22932	3759.72	12910.2	45.04	1217.61	11	-0.4	609.813	102.87	66161000	62378000	1	F1:31456	MSB60101A.raw	Q8NFU3|TSTD1_HUMAN
LQMEPAAFQAL	40.14	11841.1	10167.4	22932	3759.72	12910.2	44.93	1217.61	11	-0.4	609.813	104.19	10686000		1	F1:30095	MSB66428A.raw	Q8NFU3|TSTD1_HUMAN
LTAPALALA	31.63	26961.5	16102.3	12540	15509.7	17540.2	19.48	839.512	9	-0.3	420.763	83.78	4522000	8633600	2	F2:24570	MSB60102A.raw	Q06481|APLP2_HUMAN
LTAPALALA	31.63	26961.5	16102.3	12540	15509.7	17540.2	17.15	839.512	9	0.3	420.763	87.59	2014300		4	F4:23944	MSB66431A.raw	Q06481|APLP2_HUMAN
LTIEDGIFEV	5.92	26376.3	30464.9	14014.2	25370.3	24097	48.44	1134.58	10	-0.5	568.297	109.55	6179400		3	F3:31116	MSB66430A.raw	P11142|HSP7C_HUMAN:P54652|HSP72_HUMAN
LTIEDGIFEV	5.92	26376.3	30464.9	14014.2	25370.3	24097	48.44	1134.58	10	-0.5	568.297	109.55	3320400	2003400	3	F3:31116	MSB66430A.raw	P11142|HSP7C_HUMAN:P54652|HSP72_HUMAN
LTVPFEKHSTL	4298.75	21934.6	317.83	7470.94	3760.61	16824.5	42.55	1270.69	11	-0.3	636.353	61.91	4747400	9491400	2	F2:17854	MSB60102A.raw	O95336|6PGL_HUMAN
LTVPFEKHSTL	4298.75	21934.6	317.83	7470.94	3760.61	16824.5	47.12	1270.69	11	-1.5	636.352	69.13	180600	1214900	1	F1:19131	MSB66428A.raw	O95336|6PGL_HUMAN
LVLDSVKLEA	348.21	40097.4	24690.8	21882	35982.7	33307.2	33.69	1085.63	10	-1.6	543.823	77.62	9474300	13738000	1	F1:22682	MSB60101A.raw	O75347|TBCA_HUMAN
LVLDSVKLEA	348.21	40097.4	24690.8	21882	35982.7	33307.2	40.55	1085.63	10	-0.8	543.823	83.44	509480	389030	1	F1:23147	MSB66428A.raw	O75347|TBCA_HUMAN
LVLDSVKLEA	348.21	40097.4	24690.8	21882	35982.7	33307.2	40.55	1085.63	10	-0.8	543.823	83.44	932750	0	1	F1:23147	MSB66428A.raw	O75347|TBCA_HUMAN
LYADVGGKQF	24867.3	241.58	21800.7	32044.1	22658.5	1446.62	41.36	1096.56	10	0.2	549.285	55.38	3463100	2900700	2	F2:15763	MSB60102A.raw	P51571|SSRD_HUMAN
LYADVGGKQF	24867.3	241.58	21800.7	32044.1	22658.5	1446.62	46.19	1096.56	10	0.9	549.285	62.18	735280		1	F1:17092	MSB66428A.raw	P51571|SSRD_HUMAN
LYADVGGKQF	24867.3	241.58	21800.7	32044.1	22658.5	1446.62	46.19	1096.56	10	0.9	549.285	62.18	279100	254160	1	F1:17092	MSB66428A.raw	P51571|SSRD_HUMAN
LYDPVISKL	4128.72	561.24	18033	20798.6	5633.02	171.16	30.9	1046.6	9	1.1	524.308	80.99	2697600	2929800	2	F2:23592	MSB60102A.raw	Q96EZ8|MCRS1_HUMAN
LYGKIAEAF	25412.3	16.11	27886.3	30395.1	25220.9	974.79	33.63	1010.54	9	-0.2	506.279	70.54	2526600	4970700	2	F2:20387	MSB60102A.raw	O14908|GIPC1_HUMAN
LYGKIAEAF	25412.3	16.11	27886.3	30395.1	25220.9	974.79	37.43	1010.54	9	-0.2	506.279	76.41	702170	1952800	1	F1:21184	MSB66428A.raw	O14908|GIPC1_HUMAN
LYIGWDKHYGF	14258	56.09	34732.9	28790.7	35881.2	3706.92	50.15	1397.68	11	-1.7	699.845	91.63	1312000	1176000	3	F3:25316	MSB66430A.raw	P25789|PSA4_HUMAN
LYIGWDKHYGF	14258	56.09	34732.9	28790.7	35881.2	3706.92	50.15	1397.68	11	-1.7	699.845	91.63	3922400	1696000	3	F3:25316	MSB66430A.raw	P25789|PSA4_HUMAN
LYIVEPLKF	27378.6	17.65	37360.5	27018.1	26537.5	661.16	31.03	1120.65	9	-0.1	561.334	102.07	6776100	0	2	F2:30777	MSB60102A.raw	Q9UBS9|SUCO_HUMAN
LYIVEPLKF	27378.6	17.65	37360.5	27018.1	26537.5	661.16	35.65	1120.65	9	-2.6	561.332	105.25	986640	0	3	F3:29427	MSB66430A.raw	Q9UBS9|SUCO_HUMAN
LYKELGEYF	22904.5	43.76	30785.3	30807.3	23050.9	195.64	40.64	1160.58	9	-1.5	581.294	88.7	641900	795890	4	F4:24318	MSB66431A.raw	O60610|DIAP1_HUMAN
LYPLTNYTF	14510.1	6.5	23632.5	25063.6	3565.73	150.1	39.62	1130.56	9	-0.7	566.289	106.2	3961900	19472000	2	F2:32423	MSB60102A.raw	O43809|CPSF5_HUMAN
LYPSIIQEF	13784.1	9.15	27478.9	28909	2865.66	46.74	40.46	1108.58	9	-0.2	555.297	108.26	6715000	41095000	2	F2:33220	MSB60102A.raw	P09884|DPOLA_HUMAN
LYPSIIQEF	13784.1	9.15	27478.9	28909	2865.66	46.74	36.34	1108.58	9	0.2	555.298	108.83	8349100	7146300	4	F4:30951	MSB66431A.raw	P09884|DPOLA_HUMAN
LYPSIIQEF	13784.1	9.15	27478.9	28909	2865.66	46.74	36.34	1108.58	9	0.2	555.298	108.83	3617800	0	4	F4:30951	MSB66431A.raw	P09884|DPOLA_HUMAN
LYQEVFGRL	12966.7	79.22	24173.8	23023.5	10365.4	478.38	29.04	1123.6	9	0.3	562.809	86.97	74854	140850	4	F4:23852	MSB66431A.raw	Q14494|NF2L1_HUMAN
LYQFNPAFF	19922.8	6.85	25558.2	25957.6	11339.8	141.46	32.56	1145.55	9	-1.5	573.784	110.25	322390		3	F3:31387	MSB66430A.raw	Q9UBQ5|EIF3K_HUMAN
LYQFNPAFF	19922.8	6.85	25558.2	25957.6	11339.8	141.46	32.56	1145.55	9	-1.5	573.784	110.25	738350		3	F3:31387	MSB66430A.raw	Q9UBQ5|EIF3K_HUMAN
LYRLKFNEF	31665.7	147.11	19109.8	34300.9	15847.6	346.58	44.25	1228.66	9	-0.3	410.561	83.7	1799400	0	1	F1:23261	MSB66428A.raw	P56559|ARL4C_HUMAN
LYRLKFNEF	31665.7	147.11	19109.8	34300.9	15847.6	346.58	44.25	1228.66	9	-0.3	410.561	83.7	156210	282760	1	F1:23261	MSB66428A.raw	P56559|ARL4C_HUMAN
LYSEVDVHF	9654.64	30.77	29706.5	22463.5	20450.2	382.43	38.22	1107.52	9	0.1	554.769	79.4	1378600	1023200	4	F4:21888	MSB66431A.raw	Q7Z3K3|POGZ_HUMAN
LYTEKFEEF	21483.2	20.12	33263.6	30675.6	13862.9	203.67	39.35	1204.57	9	-0.1	603.29	75.04	6808300	15719000	2	F2:21726	MSB60102A.raw	P40222|TXLNA_HUMAN
LYTEKFEEF	21483.2	20.12	33263.6	30675.6	13862.9	203.67	47.75	1204.57	9	-1	603.289	76.26	2765700	0	4	F4:21007	MSB66431A.raw	P40222|TXLNA_HUMAN
MALGLGPWLA	128.34	23514.9	19200.5	3001.68	33605.1	26531.1	26.5	1027.55	10	-0.3	514.783	111.96	1028400		3	F3:32055	MSB66430A.raw	Q9Y3C8|UFC1_HUMAN
MALGLGPWLA	128.34	23514.9	19200.5	3001.68	33605.1	26531.1	26.5	1027.55	10	-0.3	514.783	111.96	1210100		3	F3:32055	MSB66430A.raw	Q9Y3C8|UFC1_HUMAN
MIPYQIGDVF	7148.77	3867.19	370.88	1714.2	5126.91	10677.7	42.6	1181.58	10	-1	591.796	109.45	33579000	14915000	3	F3:31049	MSB66430A.raw	Q9NQP4|PFD4_HUMAN
MIPYQIGDVF	7148.77	3867.19	370.88	1714.2	5126.91	10677.7	42.6	1181.58	10	-1	591.796	109.45	21770000	6883600	3	F3:31049	MSB66430A.raw	Q9NQP4|PFD4_HUMAN
MLPSILNQL	22.31	2021.61	14780.6	16622.1	57.34	1087.14	33.18	1027.57	9	-0.3	514.794	109.4	2854100	0	3	F3:31092	MSB66430A.raw	P20290|BTF3_HUMAN
MLPSILNQL	22.31	2021.61	14780.6	16622.1	57.34	1087.14	33.18	1027.57	9	-0.3	514.794	109.4	1331400	1408000	3	F3:31092	MSB66430A.raw	P20290|BTF3_HUMAN
MPWFKGWKV	2981.48	15841.6	367	101.07	23141.9	15159.1	45.93	1177.61	9	0.4	393.544	96.22	902500	5451200	4	F4:26275	MSB66431A.raw	P68104|EF1A1_HUMAN:Q5VTE0|EF1A3_HUMAN:Q05639|EF1A2_HUMAN
MQQYEIWREL	75.17	6062.57	14176.5	13504.7	15325.7	6332.08	48.18	1394.67	10	-2.4	698.338	99.92	5365100		1	F1:28364	MSB66428A.raw	P68402|PA1B2_HUMAN
MRYVASYLL	1959.03	2919.17	14825.5	7486.47	13606.5	43.35	41.13	1114.58	9	0.5	558.3	91.86	542340000	340760000	2	F2:25396	MSB66429A.raw	P05387|RLA2_HUMAN
MRYVASYLL	1959.03	2919.17	14825.5	7486.47	13606.5	43.35	41.13	1114.58	9	0.5	558.3	91.86	448040000	160130000	2	F2:25396	MSB66429A.raw	P05387|RLA2_HUMAN
MVLEDVTEF	231.15	3784.65	13901.9	13028.6	13652.3	3626.7	30.17	1081.5	9	-1.6	541.756	104.41	695110		1	F1:30156	MSB66428A.raw	Q9Y4Y9|LSM5_HUMAN
MVLLESEQFL	188.98	23370.1	21170.5	17775.4	17709.5	23781.3	52.81	1207.62	10	-1.7	604.814	109.57	18676000	12535000	4	F4:31237	MSB66431A.raw	P37108|SRP14_HUMAN
MVLLESEQFL	188.98	23370.1	21170.5	17775.4	17709.5	23781.3	52.81	1207.62	10	-1.7	604.814	109.57	27651000	10920000	4	F4:31237	MSB66431A.raw	P37108|SRP14_HUMAN
NFLPPIIARF	3485.67	158.97	26148.7	28243.3	7085.17	2156.22	36.63	1186.69	10	0.6	594.351	108.61	4356500	3599700	2	F2:33389	MSB60102A.raw	Q96PD2|DCBD2_HUMAN
NFLPPIIARF	3485.67	158.97	26148.7	28243.3	7085.17	2156.22	27.06	1186.69	10	-1.5	594.35	109.14	1577700		3	F3:31015	MSB66430A.raw	Q96PD2|DCBD2_HUMAN
NFLPPIIARF	3485.67	158.97	26148.7	28243.3	7085.17	2156.22	27.06	1186.69	10	-1.5	594.35	109.14	1619900		3	F3:31015	MSB66430A.raw	Q96PD2|DCBD2_HUMAN
NIIPRFVQV	10.4	17708.4	13267.1	8930.68	6645.5	3330.92	31.74	1084.64	9	-1.1	543.326	91.2	3508900	2749300	4	F4:25036	MSB66431A.raw	O75044|SRGP2_HUMAN:P0DMP2|SRG2B_HUMAN:P0DJJ0|SRG2C_HUMAN
NIIPRFVQV	10.4	17708.4	13267.1	8930.68	6645.5	3330.92	31.74	1084.64	9	-1.1	543.326	91.2	1686700	5050400	4	F4:25036	MSB66431A.raw	O75044|SRGP2_HUMAN:P0DMP2|SRG2B_HUMAN:P0DJJ0|SRG2C_HUMAN
NIIPYITNV	4.73	22781.9	21312	7820.05	8002.8	3611.12	27.84	1045.58	9	-1.1	523.797	104.62	2693000	8463500	2	F2:31652	MSB60102A.raw	Q00610|CLH1_HUMAN
NIIPYITNV	4.73	22781.9	21312	7820.05	8002.8	3611.12	17.92	1045.58	9	-1.3	523.797	106.02	1464800		3	F3:29775	MSB66430A.raw	Q00610|CLH1_HUMAN
NIPTWLTEL	164.82	10646.8	13762.5	27819.7	134.51	2266.35	32.2	1085.58	9	0.8	543.795	111.79	1412200	2984300	1	F1:35182	MSB60101A.raw	Q14669|TRIPC_HUMAN
NIPTWLTEL	164.82	10646.8	13762.5	27819.7	134.51	2266.35	32.81	1085.58	9	0.1	543.795	111.87	935380		3	F3:32031	MSB66430A.raw	Q14669|TRIPC_HUMAN
NLAEKLIGV	9.18	30020.8	25178.3	17686.2	13483.8	10717.8	22.28	955.57	9	-0.3	478.792	85.64	368530	34561	2	F2:23727	MSB66429A.raw	Q86X10|RLGPB_HUMAN
NLASFIEQV	11.19	23912.4	29858.9	10272.8	13242.9	7447.45	36.47	1019.53	9	-0.6	510.771	108.88	1766600	0	3	F3:30891	MSB66430A.raw	P61457|PHS_HUMAN
NLASFIEQV	11.19	23912.4	29858.9	10272.8	13242.9	7447.45	36.47	1019.53	9	-0.6	510.771	108.88	1057800		3	F3:30891	MSB66430A.raw	P61457|PHS_HUMAN
NLLAHFINA	41.55	29989	27370.6	15782.5	29103.6	18806	35.73	1011.55	9	-0.1	506.782	89.26	493080	4486500	2	F2:26272	MSB60102A.raw	Q9NZJ7|MTCH1_HUMAN
NLLAHFINA	41.55	29989	27370.6	15782.5	29103.6	18806	35.75	1011.55	9	-1.1	506.782	96.5	57680	273950	3	F3:26563	MSB66430A.raw	Q9NZJ7|MTCH1_HUMAN
NLLPKLHIV	19.34	17140.6	23977.9	12365.2	14681.8	7434.65	39.14	1045.66	9	-0.7	523.839	77.04	1329600	9040100	2	F2:22381	MSB60102A.raw	O00299|CLIC1_HUMAN:Q9Y696|CLIC4_HUMAN
NLPIGFLEL	312.67	4459.35	17329.5	26619.7	64.24	1907.87	18.05	1014.58	9	-3.2	508.293	113.57	908820		1	F1:35838	MSB60101A.raw	Q96N11|CG026_HUMAN
NLSDQILQV	36.04	28667	30007.9	13804.7	15760.4	6636.16	15.12	1028.55	9	0	515.282	74.16	991400		1	F1:21599	MSB60101A.raw	Q9NY47|CA2D2_HUMAN
NLWQDLPEI	13.94	15597.5	24892.6	8472.74	14819	11123.5	23.36	1126.57	9	0.4	564.29	111.54	1253200		1	F1:35054	MSB60101A.raw	Q8N5V2|NGEF_HUMAN
NQFDVVIRL	23.99	16395.9	28982.9	10903.4	15344.9	1245.84	41	1102.61	9	-1	552.313	98.42	4678400		3	F3:27197	MSB66430A.raw	Q9UNP4|SIAT9_HUMAN
NQINGSFAL	15.61	10023	8305.65	15879.7	7532.79	1911.79	27.16	962.482	9	-0.2	482.248	75.74	495620	1741400	1	F1:22156	MSB60101A.raw	Q96DY7|MTBP_HUMAN
NQPGVLIQV	25.91	16787.8	33121	19249.4	7164.41	4746.57	39.8	966.55	9	-0.4	484.282	77.62	9367800	11923000	1	F1:22776	MSB60101A.raw	P11142|HSP7C_HUMAN:P0DMV8|HS71A_HUMAN:P0DMV9|HS71B_HUMAN:P34931|HS71L_HUMAN
NQPGVLIQV	25.91	16787.8	33121	19249.4	7164.41	4746.57	40.79	966.55	9	0.1	484.282	83.88	2647200	480780	1	F1:23276	MSB66428A.raw	P11142|HSP7C_HUMAN:P0DMV8|HS71A_HUMAN:P0DMV9|HS71B_HUMAN:P34931|HS71L_HUMAN
NQTPVTLQV	79.33	20465.1	26255.6	9074.84	20742.4	5363.58	28.2	998.54	9	-0.6	500.277	64.71	2112200	2552900	1	F1:18823	MSB60101A.raw	P26368|U2AF2_HUMAN
NQTPVTLQV	79.33	20465.1	26255.6	9074.84	20742.4	5363.58	29.92	998.54	9	-0.6	500.277	70.79	767300	145090	1	F1:19519	MSB66428A.raw	P26368|U2AF2_HUMAN
NRLPLVVSF	14883.5	8861.86	24820.8	23103.1	34724.7	116.63	45.37	1043.61	9	-0.6	522.813	97.13	14456000		3	F3:26785	MSB66430A.raw	Q9UHA4|LTOR3_HUMAN
NRLPLVVSF	14883.5	8861.86	24820.8	23103.1	34724.7	116.63	45.37	1043.61	9	-0.6	522.813	97.13	4104600		3	F3:26785	MSB66430A.raw	Q9UHA4|LTOR3_HUMAN
NTIPLFVQL	68.42	7439.24	14951.8	11640.8	4283.34	3360.17	32.85	1043.6	9	-0.1	522.808	110.62	6596800	8135800	1	F1:34707	MSB60101A.raw	P35222|CTNB1_HUMAN:P14923|PLAK_HUMAN
NTIPLFVQL	68.42	7439.24	14951.8	11640.8	4283.34	3360.17	30.76	1043.6	9	-0.4	522.808	110.89	4928600	0	3	F3:31645	MSB66430A.raw	P14923|PLAK_HUMAN:P35222|CTNB1_HUMAN
NTIPLFVQL	68.42	7439.24	14951.8	11640.8	4283.34	3360.17	30.76	1043.6	9	-0.4	522.808	110.89	4229400	0	3	F3:31645	MSB66430A.raw	P14923|PLAK_HUMAN:P35222|CTNB1_HUMAN
NVIDNLIVA	49.86	37244.2	19990.2	18987.1	23312.8	13079.9	31.67	969.549	9	-0.6	485.782	99.08	26326000	105340000	1	F1:30237	MSB60101A.raw	Q12905|ILF2_HUMAN
NVIDNLIVA	49.86	37244.2	19990.2	18987.1	23312.8	13079.9	33.02	969.549	9	-0.8	485.782	102.5	5276400	15226000	4	F4:28441	MSB66431A.raw	Q12905|ILF2_HUMAN
NVIDNLIVA	49.86	37244.2	19990.2	18987.1	23312.8	13079.9	33.02	969.549	9	-0.8	485.782	102.5	4589900	26159000	4	F4:28441	MSB66431A.raw	Q12905|ILF2_HUMAN
NVLGKLLSV	9.71	22609.5	9843.98	9047.88	13276.5	7242.66	15.52	941.591	9	-0.3	471.803	94.57	1641600	2742500	2	F2:28326	MSB60102A.raw	P53355|DAPK1_HUMAN
NVLGKLLSV	9.71	22609.5	9843.98	9047.88	13276.5	7242.66	30.87	941.591	9	0.1	471.803	101.48	831290	395600	4	F4:28051	MSB66431A.raw	P53355|DAPK1_HUMAN
NVVEQFLQA	120.66	37139.2	23832.5	17858.8	30520.6	18878	38.6	1046.54	9	-1.3	524.276	102.2	2629400	9759700	2	F2:30821	MSB60102A.raw	Q14258|TRI25_HUMAN
NVVEQFLQA	120.66	37139.2	23832.5	17858.8	30520.6	18878	35.69	1046.54	9	-1.4	524.276	104.31	925790	2709000	1	F1:30126	MSB66428A.raw	Q14258|TRI25_HUMAN
NVVEQFLQA	120.66	37139.2	23832.5	17858.8	30520.6	18878	35.69	1046.54	9	-1.4	524.276	104.31	542850	6097400	1	F1:30126	MSB66428A.raw	Q14258|TRI25_HUMAN
NWPSRPYLF	27875.1	25.71	31440.4	33087.7	11738.6	670.11	29.48	1178.59	9	-0.8	590.3	90.04	2721900	13076000	2	F2:26492	MSB60102A.raw	O43795|MYO1B_HUMAN
NWPSRPYLF	27875.1	25.71	31440.4	33087.7	11738.6	670.11	27.73	1178.59	9	-1.5	590.3	95.89	1654400		3	F3:26383	MSB66430A.raw	O43795|MYO1B_HUMAN
NYARGHYTI	14906.5	10.11	15793.8	15775.5	11645.5	597.92	27.08	1093.53	9	-0.4	547.772	28.82	512400	517130	1	F1:7778	MSB60101A.raw	P68363|TBA1B_HUMAN:Q9BQE3|TBA1C_HUMAN:Q71U36|TBA1A_HUMAN:P68366|TBA4A_HUMAN:P0DPH8|TBA3D_HUMAN:P0DPH7|TBA3C_HUMAN:Q6PEY2|TBA3E_HUMAN
NYASTFTWW	23173.5	26.54	29354	24637.5	30322.5	2777.65	36.31	1174.51	9	-0.3	588.261	111.09	462620	481540	3	F3:31698	MSB66430A.raw	Q15800|MSMO1_HUMAN
NYGRVFSEW	31911.6	20.08	30366.8	26295.4	33133.2	4590.26	39.69	1156.53	9	-0.7	579.272	82.16	159260	0	4	F4:22586	MSB66431A.raw	O95219|SNX4_HUMAN
NYIGLINRI	8279.09	41.7	31970.3	18221.1	25252.8	959.54	30.9	1074.62	9	-2.1	538.315	84.38	4646500	13549000	2	F2:24661	MSB60102A.raw	P19525|E2AK2_HUMAN
NYIKDLNIL	13667.2	152.07	27091.3	30753.3	18797.6	477.93	29.7	1104.62	9	-1.1	553.316	87.62	8451200	5450300	1	F1:26052	MSB60101A.raw	Q05D32|CTSL2_HUMAN
NYIKDLNIL	13667.2	152.07	27091.3	30753.3	18797.6	477.93	39.98	1104.62	9	-1.1	553.316	92.79	3758500	2163200	3	F3:25528	MSB66430A.raw	Q05D32|CTSL2_HUMAN
NYIKDLNIL	13667.2	152.07	27091.3	30753.3	18797.6	477.93	39.98	1104.62	9	-1.1	553.316	92.79	3225300	5182600	3	F3:25528	MSB66430A.raw	Q05D32|CTSL2_HUMAN
NYKKFYEQF	34189.3	27.28	35783.9	34367	29112.4	301.66	41.12	1265.61	9	0.1	422.877	59.31	20063000	25162000	2	F2:17084	MSB60102A.raw	P07900|HS90A_HUMAN
NYKKFYEQF	34189.3	27.28	35783.9	34367	29112.4	301.66	48.76	1265.61	9	-1.8	633.81	59.09	3175100	4715600	2	F2:16193	MSB66429A.raw	P07900|HS90A_HUMAN
NYKKFYEQF	34189.3	27.28	35783.9	34367	29112.4	301.66	48.76	1265.61	9	-1.8	633.81	59.09	3415400	13082000	2	F2:16193	MSB66429A.raw	P07900|HS90A_HUMAN
NYLSIFRKF	24419.9	13.26	31769	27841.6	27846.1	189.96	43.39	1186.65	9	-0.5	396.557	87.79	5185000	38238000	1	F1:26221	MSB60101A.raw	P07384|CAN1_HUMAN
NYLSIFRKF	24419.9	13.26	31769	27841.6	27846.1	189.96	45.67	1186.65	9	-0.5	396.557	95.24	1225900	3055900	1	F1:26722	MSB66428A.raw	P07384|CAN1_HUMAN
NYTLVSHLI	12403.3	16.01	27427.8	12715.5	19384.6	1239.19	48.08	1058.58	9	0	530.295	90.16	806990	1283100	4	F4:24735	MSB66431A.raw	P56192|SYMC_HUMAN
PFIPASNLFF	10230.2	99.56	30922.5	30859.3	6392.45	8811.09	20.92	1151.6	10	1.9	576.809	113.98	401130		1	F1:35995	MSB60101A.raw	Q8IUR5|TMTC1_HUMAN:Q6ZXV5|TMTC3_HUMAN
PFLPASNLFF	4406.69	106.59	30812.3	30149.8	5104.33	8971.55	20.92	1151.6	10	1.9	576.809	113.98	401130		1	F1:35995	MSB60101A.raw	Q5T4D3|TMTC4_HUMAN
PFVDHVFTF	16882.7	42.98	35299.3	30960.7	28911.5	1556.29	40.68	1107.54	9	-0.5	554.777	97.11	8823800	15381000	2	F2:29119	MSB60102A.raw	Q8TDN6|BRX1_HUMAN
PFVDHVFTF	16882.7	42.98	35299.3	30960.7	28911.5	1556.29	44.24	1107.54	9	-1.7	554.776	102.58	3756800		3	F3:28360	MSB66430A.raw	Q8TDN6|BRX1_HUMAN
PFVDHVFTF	16882.7	42.98	35299.3	30960.7	28911.5	1556.29	44.24	1107.54	9	-1.7	554.776	102.58	3585800		3	F3:28360	MSB66430A.raw	Q8TDN6|BRX1_HUMAN
PYISNIYLI	10901.7	6.29	37098.3	22206.3	27684.2	3879.85	15.74	1094.6	9	-2	548.307	109.45	787280		3	F3:31119	MSB66430A.raw	Q02809|PLOD1_HUMAN
PYLQGQVTL	28254.3	243.69	34281.2	35411.4	25661.3	6248.57	23.44	1017.55	9	-1.1	509.781	81.04	69518		3	F3:22391	MSB66430A.raw	O15533|TPSN_HUMAN
PYNPIIGETF	34971.3	58.33	36607.4	36436.7	28370.8	8854.48	41.65	1149.57	10	-1	575.792	104.07	306410	86891000	2	F2:31116	MSB60102A.raw	Q9BXB4|OSB11_HUMAN:Q9BXB5|OSB10_HUMAN
PYNPIIGETF	34971.3	58.33	36607.4	36436.7	28370.8	8854.48	34.26	1149.57	10	-0.7	575.792	105.54	5646800		3	F3:29544	MSB66430A.raw	Q9BXB4|OSB11_HUMAN:Q9BXB5|OSB10_HUMAN
PYNPIIGETF	34971.3	58.33	36607.4	36436.7	28370.8	8854.48	34.26	1149.57	10	-0.7	575.792	105.54	1700500	4284500	3	F3:29544	MSB66430A.raw	Q9BXB4|OSB11_HUMAN:Q9BXB5|OSB10_HUMAN
PYNPILGETF	35543.5	56.61	36426.1	36632.8	29884.4	9599.74	41.65	1149.57	10	-1	575.792	104.07	306410	86891000	2	F2:31116	MSB60102A.raw	Q9H0X9|OSBL5_HUMAN:Q9BZF1|OSBL8_HUMAN
PYNPILGETF	35543.5	56.61	36426.1	36632.8	29884.4	9599.74	34.26	1149.57	10	-0.7	575.792	105.54	5646800		3	F3:29544	MSB66430A.raw	Q9H0X9|OSBL5_HUMAN:Q9BZF1|OSBL8_HUMAN
PYNPILGETF	35543.5	56.61	36426.1	36632.8	29884.4	9599.74	34.26	1149.57	10	-0.7	575.792	105.54	1700500	4284500	3	F3:29544	MSB66430A.raw	Q9H0X9|OSBL5_HUMAN:Q9BZF1|OSBL8_HUMAN
PYRLIFEKF	40319.2	103.12	39822.8	38738.3	41851.8	10709	35.66	1211.67	9	0.2	404.897	80.88	795160	2627300	2	F2:23544	MSB60102A.raw	P78527|PRKDC_HUMAN
PYRLIFEKF	40319.2	103.12	39822.8	38738.3	41851.8	10709	29.81	1211.67	9	0.2	404.897	86.86	59849		3	F3:23983	MSB66430A.raw	P78527|PRKDC_HUMAN
PYTKVEESF	39386.6	171.04	41038.8	39941.9	41999.2	13206	30.68	1098.52	9	1.5	550.27	47.46	386800	1157900	2	F2:13461	MSB60102A.raw	Q9BV10|ALG12_HUMAN
PYTPFLTEL	24356.5	321.12	33605.8	34071.9	17569.8	1633.96	25.39	1079.55	9	-1.4	540.783	109.42	1223100	1165500	4	F4:31203	MSB66431A.raw	P41252|SYIC_HUMAN
QIFNGTFVKL	297.45	7798.84	14689.9	18442.3	19308	12284.1	36.85	1165.65	10	-0.1	583.832	97.16	1039100		3	F3:26797	MSB66430A.raw	P18124|RL7_HUMAN
QLIDKVWQL	7.32	5795.62	22283.3	16194.2	8349.71	1275.42	30.96	1141.65	9	-0.7	571.832	95.37	6110900	32015000	2	F2:28369	MSB60102A.raw	Q92503|S14L1_HUMAN
QLVDIIEKV	13.03	30741	35573.5	14122.6	27498.8	18272.5	32.35	1055.62	9	0	528.819	88.22	14815000	25210000	2	F2:25993	MSB60102A.raw	P61289|PSME3_HUMAN
QMEPAAFQAL	1107.18	6691.03	11157.1	26855.8	351.68	12048.6	33.86	1104.53	10	-2.1	553.27	92.02	130240		1	F1:25658	MSB66428A.raw	Q8NFU3|TSTD1_HUMAN
QQDPQQYNV	145.59	24329.4	32826	19076.7	29476.6	22813.5	20.77	1118.5	9	0.7	560.257	32.8	187630		1	F1:9018	MSB60101A.raw	P35869|AHR_HUMAN
QRQDIAFAY	24875.3	27232.1	36317.1	34931.2	43479.8	195.86	37.76	1110.55	9	0.4	556.28	59.41	748960	1199300	1	F1:17094	MSB60101A.raw	P07355|ANXA2_HUMAN
QVLEDFPTI	10.56	6569.29	22773.8	6464.16	17075.8	18752.7	19.19	1060.54	9	-0.9	531.279	104.71	1428800		1	F1:30310	MSB66428A.raw	P37268|FDFT_HUMAN
QYAPLLAVF	14401.4	12.68	20623.8	26025.9	15750	173.39	34.83	1020.56	9	0.2	511.29	112	2970700	6615900	2	F2:34765	MSB60102A.raw	Q9Y6E2|BZW2_HUMAN
QYAPLLAVF	14401.4	12.68	20623.8	26025.9	15750	173.39	39.13	1020.56	9	0.2	511.29	112.34	2550500	1836000	4	F4:32277	MSB66431A.raw	Q9Y6E2|BZW2_HUMAN
QYAPLLAVF	14401.4	12.68	20623.8	26025.9	15750	173.39	39.13	1020.56	9	0.2	511.29	112.34	2938600	1096600	4	F4:32277	MSB66431A.raw	Q9Y6E2|BZW2_HUMAN
QYLQDAYSF	17339	18.03	30492.9	28930.3	29605.1	1390.22	32.87	1133.5	9	0.1	567.759	88.84	516750	1144400	2	F2:24536	MSB66429A.raw	Q15021|CND1_HUMAN
QYLQDAYSF	17339	18.03	30492.9	28930.3	29605.1	1390.22	32.87	1133.5	9	0.1	567.759	88.84	511360		2	F2:24536	MSB66429A.raw	Q15021|CND1_HUMAN
QYSPLLAAF	15289.2	31.95	19005.8	28857.7	16346.2	243.99	24.82	1008.53	9	-0.1	505.271	108.88	2063000		3	F3:30894	MSB66430A.raw	Q7L1Q6|BZW1_HUMAN
QYSPLLAAF	15289.2	31.95	19005.8	28857.7	16346.2	243.99	24.82	1008.53	9	-0.1	505.271	108.88	1874400	0	3	F3:30894	MSB66430A.raw	Q7L1Q6|BZW1_HUMAN
RFIGATANF	6851.69	18.31	10987.8	27679.1	9848.88	545.65	25.92	995.519	9	-0.6	498.766	60.98	3335800		1	F1:17563	MSB60101A.raw	Q8TDP1|RNH2C_HUMAN
RFIGATANF	6851.69	18.31	10987.8	27679.1	9848.88	545.65	29.86	995.519	9	-1.3	498.766	61.9	561480		3	F3:16940	MSB66430A.raw	Q8TDP1|RNH2C_HUMAN
RFIGATANF	6851.69	18.31	10987.8	27679.1	9848.88	545.65	29.86	995.519	9	-1.3	498.766	61.9	244600	702230	3	F3:16940	MSB66430A.raw	Q8TDP1|RNH2C_HUMAN
RFLNDPGHLLW	10468.2	135.99	27611.8	25923.9	28960	14877.2	33.39	1366.71	11	2.8	684.366	95.27	548590		1	F1:26729	MSB66428A.raw	Q9H633|RPP21_HUMAN
RFQSSAVMAL	108.44	1117	3309.65	24447.9	7273.76	3341.53	15.83	1108.57	10	-0.5	555.292	67.81	172160		2	F2:18735	MSB66429A.raw	P68431|H31_HUMAN:Q71DI3|H32_HUMAN:Q16695|H31T_HUMAN:Q5TEC6|H3PS2_HUMAN
RIIDVVYNA	8.45	23621.3	19945.7	15263.1	28748.4	14741.2	34.4	1061.59	9	0.6	531.801	65.06	2330500	10146000	2	F2:18846	MSB60102A.raw	P62241|RS8_HUMAN
RLASYLDRV	7.97	15223.4	22719.9	17170.7	13787.9	14420.6	34.13	1091.61	9	-0.1	546.812	55.66	1282800	2551200	2	F2:15837	MSB60102A.raw	P05783|K1C18_HUMAN
RLASYLDRV	7.97	15223.4	22719.9	17170.7	13787.9	14420.6	35.7	1091.61	9	0.2	546.812	63.42	434500		1	F1:17426	MSB66428A.raw	P05783|K1C18_HUMAN
RLKLPAVVTADL	5045.9	27525.9	244.07	20543.8	24072.3	28372	47.6	1294.8	12	-0.3	648.406	88.66	5891800		3	F3:24483	MSB66430A.raw	P38117|ETFB_HUMAN
RLKLPAVVTADL	5045.9	27525.9	244.07	20543.8	24072.3	28372	47.6	1294.8	12	-0.3	648.406	88.66	2218500		3	F3:24483	MSB66430A.raw	P38117|ETFB_HUMAN
RLPETLPSL	8.59	1233.24	3819.62	22913.4	13.84	660.35	26.09	1024.59	9	-0.7	513.303	76.61	6115700	11399000	2	F2:22347	MSB60102A.raw	P37088|SCNNA_HUMAN
RLPETLPSL	8.59	1233.24	3819.62	22913.4	13.84	660.35	29.45	1024.59	9	-0.7	513.303	79.9	1811900		4	F4:21984	MSB66431A.raw	P37088|SCNNA_HUMAN
RPRGSQSLL	27009.9	30729.4	3.06	8348.35	9645.97	13350.4	13.56	1012.58	9	-0.3	507.296	20.55	381700		1	F1:5355	MSB60101A.raw	P21860|ERBB3_HUMAN
RPRKAFLL	29643.8	12412	10.17	10348.1	14653.4	11975.3	25.14	999.634	8	0.8	500.825	34.3	1949000	2651300	1	F1:9456	MSB60101A.raw	P13667|PDIA4_HUMAN
RPRKAFLL	29643.8	12412	10.17	10348.1	14653.4	11975.3	16.51	999.634	8	-1.8	500.823	46.72	546260		1	F1:12654	MSB66428A.raw	P13667|PDIA4_HUMAN
RPRKAFLLLL	11772.4	12894.1	5.68	5179.82	22332.3	3423.4	30.89	1225.8	10	-0.8	409.608	76.87	23695000	26818000	2	F2:22281	MSB60102A.raw	P13667|PDIA4_HUMAN
RPRKAFLLLL	11772.4	12894.1	5.68	5179.82	22332.3	3423.4	36.62	1225.8	10	-0.2	409.608	81.37	6006000	7238200	4	F4:22377	MSB66431A.raw	P13667|PDIA4_HUMAN
RPRKAFLLLL	11772.4	12894.1	5.68	5179.82	22332.3	3423.4	36.62	1225.8	10	-0.2	409.608	81.37	4807600	0	4	F4:22377	MSB66431A.raw	P13667|PDIA4_HUMAN
RQLEAIVRI	5.92	1935.81	25651	10201.6	20751.4	9717.52	13.74	1096.67	9	2.3	549.344	59.72	122600	587200	2	F2:17108	MSB60102A.raw	P33992|MCM5_HUMAN
RQYAKDIGF	254.7	2923.95	18869.6	26013.5	19775.9	6617.44	39.51	1096.57	9	-0.2	549.29	40.94	1901300	1043700	1	F1:11487	MSB60101A.raw	P62273|RS29_HUMAN
RQYAKDIGF	254.7	2923.95	18869.6	26013.5	19775.9	6617.44	40.69	1096.57	9	-1.1	549.29	49.08	1184500		1	F1:13237	MSB66428A.raw	P62273|RS29_HUMAN
RVAPEEHPVL	2273.75	15916.3	2256.3	25821.2	315.4	11411.7	34.95	1145.62	10	0	573.817	32	3813500	1765200	1	F1:8789	MSB60101A.raw	P60709|ACTB_HUMAN:P63261|ACTG_HUMAN:A5A3E0|POTEF_HUMAN
[truncated: 336 more rows]
